# Supplementary material for: Glycidyl alkoxysilane reactivities towards simple nucleophiles in organic media for improved molecular structure definition in hybrid materials
Source: Royal Society of Chemistry journal article supplement (doi:10.1039/c6ra01658h), 2016-01-01

## ELECTRONIC SUPPLEMENTARY INFORMATION FOR:

# Glycidyl Alkoxysilanes Reactivities Towards Simple Nucleophiles in Organic Media for Improved Molecular Structure Definition in Hybrid Materials.

X. Guillory,<sup>a,b</sup> A. Tessier,<sup>\*c</sup> G.-O. Gratien,<sup>a,c</sup> P. Weiss,<sup>d</sup> S. Collic-Jouault,<sup>b</sup> D. Dubreuil,<sup>c</sup> J. Lebreton<sup>c</sup> and J. Le Bideau<sup>a</sup>

<sup>a</sup>Institut des Matériaux Jean Rouxel (IMN), UMR 6502, 2 rue de la Houssinière, 44322 Nantes, France.

<sup>b</sup>IFREMER, Laboratoire EM<sup>2</sup>B, rue de l'île d'Yeu, 44311 Nantes, France.

<sup>c</sup>CEISAM, UMR 6230, équipe Symbiose, 2 rue de la Houssinière, 44322 Nantes, France.

<sup>d</sup>LIOAD, INSERM U791, 1 place Alexis Ricordeau, 44042 Nantes, France

Corresponding author: Arnaud Tessier: [arnaud.tessier@univ-nantes.fr](mailto:arnaud.tessier@univ-nantes.fr)

### TABLE OF CONTENT

|    |                                                                                                 |        |
|----|-------------------------------------------------------------------------------------------------|--------|
| A. | General information                                                                             | SI_2   |
| B. | Loss of material due to purification on silica-gel of alkoxysilanes                             | SI_3   |
| C. | Experimental procedures                                                                         | SI_4   |
| D. | Spectroscopic data ( <sup>1</sup> H, <sup>13</sup> C, 2D NMR & MS)                              | SI_13  |
| E. | Reference <sup>1</sup> H NMR spectra (GPTMS, GPTES, PECS)                                       | SI_143 |
| F. | Complementary spectra cited in the main text                                                    | SI_146 |
| G. | Objections and misinterpretations of the literature                                             | SI_176 |
| H. | BF <sub>3</sub> •Et <sub>2</sub> O for functionalization of glycidylalkoxysilanes in literature | SI_183 |

## A. GENERAL INFORMATION

Solvents were purified and dried by standard methods prior to use; alternatively, the MB SPS-800-dry solvent system was used to dry toluene and diethyl ether. Dry dichloromethane was obtained by refluxing solvent on calcium hydride for an hour and distilled under argon. GPTMS (Merck, 97%, 841807.0100), GPTES (Sigma-Aldrich, >97%) and PECS (Sigma-Aldrich, ≈90%) were used without prior purification and stored under argon atmosphere. Solid Lewis acids  $\text{ZnCl}_2$  and  $\text{Cu}(\text{BF}_4)_2$  were dried by toluene co-evaporation. Glassware used for reaction was either flame dried under vacuum or under argon stream for several minutes. Reactions were carried out under rigorous anhydrous conditions and argon stream/positive pressure of argon.  $^1\text{H}$  and  $^{13}\text{C}$  NMR spectra were recorded on a *Bruker Avance 300* spectrometer fitted with a 5 mm i.d. BBO probe carefully tuned to the recording frequency of 300.13 MHz (for  $^1\text{H}$ ) and 75.47 MHz (for  $^{13}\text{C}$ ), the temperature of the probe was set at room temperature (around 293-294 K), on a *Bruker Avance 400* spectrometer fitted with a 5 mm i.d. BBFO+ probe carefully tuned to the recording frequency of 400.13 MHz (for  $^1\text{H}$ ) and 100.61 MHz (for  $^{13}\text{C}$ ), the temperature of the probe was set at 303 K, and on a *Bruker Avance 500* fitted with a 5 mm i.d.  $^{13}\text{C}/^1\text{H}$  dual cryoprobe carefully tuned to the recording frequency of 500.13 MHz (for  $^1\text{H}$ ) and 125.76 MHz (for  $^{13}\text{C}$ ), the temperature of the probe was set at 303 K. The spectra are referenced to the solvent in which they were run (7.26 ppm for  $^1\text{H}$   $\text{CDCl}_3$  and 77.16 ppm for  $^{13}\text{C}$   $\text{CDCl}_3$ , 4.79 ppm for  $^1\text{H}$   $\text{D}_2\text{O}$ , 3.31 ppm for  $^1\text{H}$   $\text{CD}_3\text{OD}$  and 49.00 ppm for  $^{13}\text{C}$   $\text{CD}_3\text{OD}$ ). Chemical shifts (  $\delta$  ) are given in ppm, and coupling constants ( $J$ ) are given in Hz with the following splitting abbreviations: s = singlet, d = doublet, t = triplet, q = quartet, qt = quintet, sx = sextuplet, sp = septuplet, m = massif and br = broad. All assignments were confirmed with the aid of two-dimensional  $^1\text{H}$ ,  $^1\text{H}$  (COSY), or  $^1\text{H}$ ,  $^{13}\text{C}$  (HSQC, HMBC) experiments using standard pulse programs. All reactions were monitored by TLC on commercially available precoated plates (Kieselgel 60 F254), and the compounds were visualized with  $\text{KMnO}_4$  solution [ $\text{KMnO}_4$  (3 g),  $\text{K}_2\text{CO}_3$  (20 g),  $\text{NaOH}$  (5% aq.; 5 mL),  $\text{H}_2\text{O}$  (300 mL)] and heating or by UV (254 nm) when possible. Flash column chromatography was carried out using high purity grade (Merck grade 9385) pore size 60Å, 230-400 mesh particle size silica gel (Sigma Aldrich). Combi-Flash chromatography was carried out using Reveleris® X2 Flash Chromatography System with ELSD detection and Reveleris® Flash Cartridges (40 & 20  $\mu\text{m}$   $\text{SiO}_2$ ). Mobile phases are reported in relative composition (e.g. 1:1, PE/AcOEt v/v). Solvents used for chromatography were prior distilled on a Buchi rotavapor R-220-SE. Low resolution mass spectrometry (MS) were recorded on a ThermoFinnigan DSQII quadripolar spectrometer (coupled with a TracUltra GC apparatus) for Chemical Ionization (CI), on a ThermoFinnigan LCQ Advantage spectrometer for ElectroSpray Ionisation (ESI). High resolution mass spectrometry (HRMS) were recorded on a ThermoFinnigan MAT95XL spectrometer (for CI) and on a ThermoFisher Scientific LTQ-Orbitrap spectrometer (for ESI+).

### B. LOSS OF MATERIAL DUE TO PURIFICATION ON SILICA-GEL OF ALKOXYSILANES

Firstly, it is worth noting that the reaction crude purification on silica causes a loss of matter due to the hydrolysis and condensation of alkoxy silanes on silica-gel. The less stabilized the silane is, the more material is lost during purification. To support this claim, ideal purifications (*i.e* quick elution, isocratic or gradient) were performed for the pure commercial compounds and the recovery rate was calculated for each (Table 1.).

**Table 1. functional alkoxy silane recovery rates after silica-gel chromatography**

|       | Ratio<br>Crude mixture :SiO <sub>2</sub> | Recovery rate (%) |
|-------|------------------------------------------|-------------------|
| GPTMS | 1:60                                     | 57%               |
|       | 1:100                                    | 18%               |
| GPTES | 1:60                                     | 80%               |
|       | 1:100                                    | 70%               |
| PECS  | 1:100                                    | 77%               |

As seen in Table 1, GPTMS recovery rate drops significantly when the silica-gel quantity increase since it is the most sensitive to hydrolysis. In comparison, GPTES recovery rate is fairly high and is not as much affected by the increase of silica-gel. These results are in accordance with the literature that said steric factors exert the greatest effect on the hydrolytic stability of alkoxy silanes.<sup>1-3</sup> To avoid the loss of one or multiple sub-compounds on silica, the reactions were performed on an unusually high scale to yield sufficient crude quantity in view of the purification. Furthermore, after each purification, the representativeness of the isolated species compared to the crude was verified.

- (1) Brinker, C. J. Hydrolysis and Condensation of Silicates: Effects on Structure. *J. Non-Cryst. Solids* **1988**, *100* (1-3), 31-50.
- (2) Voronkov, M. G.; Yuzhelevskii, Y. A.; Mileshkevich, V. P. The Siloxane Bond and Its Influence on the Structure and Physical Properties of Organosilicon Compounds. *Russ. Chem. Rev.* **1975**, *44* (4), 355.
- (3) Arkles, B.; Steinmetz, J. R.; Zazyczny, J.; Mehta, P. Factors Contributing to the Stability of Alkoxy silanes in Aqueous Solution. *J. Adhes. Sci. Technol.* **1992**, *6* (1), 193-206.

### C. EXPERIMENTAL PROCEDURES

#### Procedure for the reaction of *n*-propylamine with GPTMS in THF-*d*<sub>8</sub> for NMR <sup>1</sup>H monitoring

In a dried vial with a septum cap was introduced GPTMS (10 μL, 0.045 mmol, 0.027M, 1 eq), *n*-propylamine (3.7 μL, 0.045 mmol, 0.027M, 1 eq, dried over 3Å molecular sieves) and THF-*d*<sub>8</sub> (0.6 mL). The mixture was homogenized by manual shaking of the vial and the resulting solution was then removed with a syringe and introduced in a dried NMR tube under argon atmosphere. The NMR tube was then sealed and the reaction monitored by <sup>1</sup>H NMR with acquisition at *t* = 0.5h, 1h, 2h, 3h, 24h.

#### General procedure for the reaction of *n*-butylamine with GPTMS in THF

In a dried 25 mL two-necked round bottom flask equipped with a condenser and under a gentle argon flow was introduced freshly distilled THF (12.5 mL), *n*-butylamine (0.49 mL, 5 mmol, 1 eq, freshly dist. over CaH<sub>2</sub>) and GPTMS (2.21 mL, 10 mmol, 2 eq). Then the reaction was heated at 60 °C under positive argon atmosphere and stirring for 48h. The volatiles were evaporated by rotary-evaporation and the residue was dried under high-vacuum to afford 2.29 g of crude mixture.

#### General procedure for the reaction of *n*-butylamine with GPTMS in solvent-free conditions

In a dried glass tube (20 mm diameter, 150 mm height, magnetic stirring) under a gentle argon flow was introduced *n*-butylamine (0.67 mL, 6.8 mmol, 1 eq, freshly dist. over CaH<sub>2</sub>) and GPTMS (3.00 mL, 13.58 mmol, 2 eq). The tube was sealed under argon atmosphere and heated at 70 °C for 48h. After 24h, the mixture was too viscous to be efficiently stirred. After 48h a gel was obtained, fractioned in smaller parts with a spatula, washed with DCM and methanol, and dried as best as possible under high-vacuum to afford 3.5 g of crude. A small quantity of the crude was solubilized in a 0.1M solution of NaOD/D<sub>2</sub>O and the resulting solution was analyzed by <sup>1</sup>H NMR.

#### Synthesis of 1-(1,4,8,11-tetraazacyclotetradecan-1-yl)-3-(3-(triethoxysilyl)propoxy)propan-2-ol (**3**)

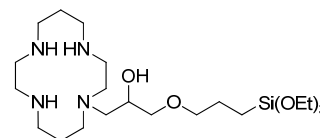

In a dried 25 mL two-necked round bottom flask equipped with a condenser and under a gentle argon flow was introduced cyclam (500 mg, 2.5 mmol, 5 eq) and toluene (6 mL). The suspension was heated at reflux until complete dissolution (clear solution). Then, a solution of GPTES (0.139 mL, 0.5 mmol, 1 eq) in toluene (4 mL) was added dropwise while refluxing. Refluxing was continued for 24 h, after which the reaction mixture was cooled to room temperature and then kept in the freezer overnight. The precipitate of excess cyclam was then removed by filtration and washed with cold toluene. The filtrates were combined and evaporated to dryness by rotary-evaporation and the residue was dried under high-*vacuum* for 2h to afford **3** (257 mg, 0.53 mmol, 106%). The crude purity was satisfactory enough to avoid further purification. <sup>1</sup>H NMR (300.16 MHz, CDCl<sub>3</sub>, 20°C): δ = 3.80(q, *J* = 7.0 Hz, 6H, Si-O-CH<sub>2</sub>-CH<sub>3</sub>); 3.75-3.68(m, 1H, CH<sub>2</sub>-CH-CH<sub>2</sub>); 3.47-3.38(m, 3H, CH-CH<sub>2</sub>-O-CH<sub>2</sub>); 3.31(dd, *J* = 9.6 & 6.3 Hz, CH-CH<sub>2</sub>-O-CH<sub>2</sub>); 2.94-2.47(m, 16H, CH<sub>2</sub>-NH-CH<sub>2</sub> & CH<sub>2</sub>-N-CH<sub>2</sub>), 2.41(dd, *J* = 14.2 & 2.0 Hz, N-CH<sub>2</sub>-CH); 2.06-1.91(m, 1H, N-CH<sub>2</sub>-CH<sub>2</sub>-CH<sub>2</sub>-NH); 1.73-1.62(m, 4H, NH-CH<sub>2</sub>-CH<sub>2</sub>-CH<sub>2</sub>-NH & CH<sub>2</sub>-CH<sub>2</sub>-Si); 1.55(dt, *J* = 14.5 & 3.7 Hz, 1H, N-CH<sub>2</sub>-CH<sub>2</sub>-CH<sub>2</sub>-NH); 1.21(t, *J* = 7.0 Hz, 9H, Si-O-CH<sub>2</sub>-CH<sub>3</sub>); 0.67-0.58(m, 2H, CH<sub>2</sub>-Si) ppm. <sup>13</sup>C NMR (75.47 MHz, CDCl<sub>3</sub>, 20°C): δ = 73.90(CH-CH<sub>2</sub>-O-CH<sub>2</sub>); 73.52(CH-CH<sub>2</sub>-O-CH<sub>2</sub>); 70.26(CH<sub>2</sub>-CH-CH<sub>2</sub>); 59.65(N-CH<sub>2</sub>-CH); 58.48(Si-O-CH<sub>2</sub>-CH<sub>3</sub>); 58.33 & 58.21(CH<sub>2</sub>-N-CH<sub>2</sub>); 51.63, 50.63, 50.41, 49.22, 48.65 & 48.09(CH<sub>2</sub>-NH-CH<sub>2</sub>-CH<sub>2</sub>-NH-CH<sub>2</sub>-CH<sub>2</sub>-CH<sub>2</sub>-NH-CH<sub>2</sub>); 29.07(NH-CH<sub>2</sub>-CH<sub>2</sub>-CH<sub>2</sub>-NH); 26.87(N-CH<sub>2</sub>-CH<sub>2</sub>-CH<sub>2</sub>-NH); 23.07(CH<sub>2</sub>-CH<sub>2</sub>-Si); 18.44(Si-O-CH<sub>2</sub>-CH<sub>3</sub>); 6.61(CH<sub>2</sub>-Si) ppm. MS (CI): *m/z* (%) 479.3 (100) [M+H<sup>+</sup>]



# SI\_5

## General procedure for the reaction of cyclam with GPTMS leading to 1-((2,2-dimethoxy-1,6,2-dioxasilocan-8-yl)methyl)-1,4,8,11-tetraazacyclotetradecane (4) and 1-(1,4,8,11-tetraazacyclotetradecan-1-yl)-3-(3-(trimethoxysilyl)propoxy)propan-2-ol (5)

In a dried 25 mL two-necked round bottom flask equipped with a condenser and under a gentle argon flow was introduced cyclam (500 mg, 2.5 mmol, 5 eq) and toluene (6 mL). The suspension was heated at reflux until complete dissolution (clear solution). Then, a solution of GPTMS (0.110 mL, 0.5 mmol, 1 eq) in toluene (4 mL) was added dropwise while refluxing. Refluxing was continued for 5.5 h, after which the reaction mixture was cooled to room temperature and then kept in the freezer overnight. The precipitate of excess cyclam was then removed by filtration and washed with cold toluene. The filtrates were combined and evaporated to dryness by rotary-evaporation and the residue was dried under high-vacuum to afford 266 mg of a mixture of **4** and **5**. Crude  $^1\text{H}$  &  $^{13}\text{C}$  NMR spectra available in Supporting Information, Figure S9-S10. MS (CI):  $m/z$  (%) 405.3 (100) [ $M+H^+$ ], 437.3 (21) [ $M+H^+$ ]. HRMS (ESI): (**4**)  $m/z$  calcd for  $\text{C}_{18}\text{H}_{41}\text{O}_4\text{N}_4\text{Si}$  [ $M+H^+$ ] 405.2892, found 405.2895, (**5**)  $m/z$  calcd for  $\text{C}_{19}\text{H}_{45}\text{O}_5\text{N}_4\text{Si}$  [ $M+H^+$ ] 437.3154, found 437.3154.

## Synthesis of *N*-[(2,2-diethoxy-1,6-dioxo-2-silacyclooct-8-yl)methyl]-2-phenylethanamine (6) and *N*-[2-hydroxy-3-[3-(triethoxysilyl)propoxy]propyl]-2-phenylethanamine (7)

In a dried 25 mL two-necked round bottom flask equipped with a condenser and under a gentle argon flow was introduced phenethylamine (0.315 mL, 2.5 mmol, 5 eq) and toluene (6 mL). Once at reflux, a solution of GPTES (0.139 mL, 0.5 mmol, 1 eq) in toluene (4 mL) was added dropwise while refluxing. Refluxing was continued for 18 h, after which the reaction mixture was evaporated to dryness by rotary-evaporation and the residue was dried under high-vacuum to afford 493 mg of crude. Purification was performed by flash chromatography on a 40g/40 $\mu\text{m}$   $\text{SiO}_2$  column with liquid injection and gradient elution (100:0-92:8,  $\text{CHCl}_3/\text{MeOH}$ ) and yielded **6** (72 mg, 0.204 mmol, 41%) and **7** (29 mg, 0.072 mmol, 15%) as pure colorless oils.

*N*-[(2,2-diethoxy-1,6-dioxo-2-silacyclooct-8-yl)methyl]-2-phenylethanamine (**6**)

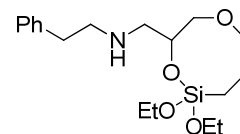

$^1\text{H}$  NMR (300.16 MHz,  $\text{CDCl}_3$ , 20°C):  $\delta$  = 7.31-7.24 & 7.23-7.15 (m, 2 & 3H, *phenyl*); 4.20(m, 1H,  $\text{CH}_2\text{-CH-CH}_2$ ); 3.78(q,  $J$  = 7.0 Hz, 2H, Si-O- $\text{CH}_2\text{-CH}_3$ ); 3.71(q,  $J$  = 7.0 Hz, 2H, Si-O- $\text{CH}_2\text{-CH}_3$ ); 3.75-3.65(m, 1H,  $\text{CH-CH}_2\text{-O-CH}_2$ ); 3.65-3.57 & 3.54-3.45(m,  $\text{CH-CH}_2\text{-O-CH}_2$ ); 3.23(dd,  $J$  = 10.9 & 10.3 Hz, 1H,  $\text{CH-CH}_2\text{-O-CH}_2$ ); 2.95-2.75(m, 4H,  $\text{CH}_2\text{-CH}_2\text{-NH}$ ); 2.63(d,  $J$  = 5.6 Hz, 2H,  $\text{NH-CH}_2\text{-CH}$ ); 1.87-1.62(m, 2H,  $\text{CH}_2\text{-CH}_2\text{-Si}$ ); 1.19(dt,  $J$  = 10.1 & 7.0 Hz, 6H, Si-O- $\text{CH}_2\text{-CH}_3$ ); 0.72(m, 2H,  $\text{CH}_2\text{-Si}$ ) ppm.  $^{13}\text{C}$  NMR (75.47 MHz,  $\text{CDCl}_3$ , 20°C):  $\delta$  = 140.11, 128.82, 128.57 & 126.27(*phenyl*); 73.84( $\text{CH-CH}_2\text{-O-CH}_2$ ); 72.53( $\text{CH-CH}_2\text{-O-CH}_2$ ); 72.19( $\text{CH}_2\text{-CH-CH}_2$ ); 58.50 & 58.32(Si-O- $\text{CH}_2\text{-CH}_3$ ); 51.99( $\text{NH-CH}_2\text{-CH}$ ); 51.41( $\text{CH}_2\text{-CH}_2\text{-NH}$ ); 36.62( $\text{CH}_2\text{-CH}_2\text{-NH}$ ); 24.25( $\text{CH}_2\text{-CH}_2\text{-Si}$ ); 18.49 & 18.43(Si-O- $\text{CH}_2\text{-CH}_3$ ); 8.32( $\text{CH}_2\text{-Si}$ ) ppm. HRMS (ESI):  $m/z$  calcd for  $\text{C}_{18}\text{H}_{32}\text{NO}_4\text{Si}$  [ $M+H^+$ ] 354.2101, found 354.2095.

*N*-[2-hydroxy-3-[3-(triethoxysilyl)propoxy]propyl]-2-phenylethanamine (**7**)

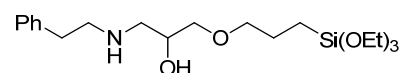

$^1\text{H}$  NMR (300.16 MHz,  $\text{CDCl}_3$ , 20°C):  $\delta$  = 7.32-7.25 & 7.24-7.16 (m, 2 & 3H, *phenyl*); 3.83(m, 1H,  $\text{CH}_2\text{-CH-CH}_2$ ); 3.81(q,  $J$  = 7.0 Hz, 6H, Si-O- $\text{CH}_2\text{-CH}_3$ ); 3.48-3.35(m, 4H,  $\text{CH-CH}_2\text{-O-CH}_2$ ); 2.95-2.76(m, 4H,  $\text{CH}_2\text{-CH}_2\text{-NH}$ ); 2.75(dd,  $J$  = 12.1 & 4.0 Hz, 1H,  $\text{NH-CH}_2\text{-CH}$ ); 2.66 (dd,  $J$  = 12.1 & 7.9 Hz, 1H,  $\text{NH-CH}_2\text{-CH}$ ); 1.69(m, 2H,  $\text{CH}_2\text{-CH}_2\text{-Si}$ ); 1.22(t,  $J$  = 7.0 Hz, 9H, Si-O- $\text{CH}_2\text{-CH}_3$ ); 0.63(m, 2H,  $\text{CH}_2\text{-Si}$ ) ppm.  $^{13}\text{C}$  NMR (75.47 MHz,  $\text{CDCl}_3$ , 20°C):  $\delta$  = 139.95, 128.84, 128.62 & 126.33(*phenyl*); 73.79( $\text{CH-CH}_2\text{-O-CH}_2$ ); 73.43( $\text{CH-CH}_2\text{-O-CH}_2$ ); 68.87( $\text{CH}_2\text{-CH-CH}_2$ ); 58.52(Si-O- $\text{CH}_2\text{-CH}_3$ ); 52.02( $\text{NH-CH}_2\text{-CH}$ ); 51.21( $\text{CH}_2\text{-CH}_2\text{-NH}$ ); 36.48( $\text{CH}_2\text{-CH}_2\text{-NH}$ ); 23.09( $\text{CH}_2\text{-CH}_2\text{-Si}$ ); 18.43(Si-O- $\text{CH}_2\text{-CH}_3$ ); 6.69( $\text{CH}_2\text{-Si}$ ) ppm. HRMS (ESI):  $m/z$  calcd for  $\text{C}_{20}\text{H}_{38}\text{NO}_5\text{Si}$  [ $M+H^+$ ] 400.2519, found 400.2511.

# SI\_6

## General procedure for the reaction of *n*-propanethiol with GPTMS

In a dried 25 mL two-necked round bottom flask equipped with a condenser and under a gentle argon flow was introduced toluene (12.5 mL), *n*-propanethiol (761 mg, 10 mmol, 1 eq) and GPTMS (2.360 g, 10 mmol, 1 eq). The solution was then heated at 60 °C and the reaction monitored by TLC. After 26h and no signs of progression by TLC monitoring, the reaction was stopped and the volatiles removed by rotary-evaporation and dried under high-vacuum to afford 2.42 g of crude mixture. <sup>1</sup>H NMR spectrum of the crude mixture was strictly the same as the starting GPTMS.

## General procedure for the reaction of *n*-dodecanethiol with GPTMS

In a dried 25 mL two-necked round bottom flask equipped with a condenser and under a gentle argon flow was introduced toluene (12.5 mL), *n*-dodecanethiol (2.024 g, 10 mmol, 1 eq) and GPTMS (2.360 g, 10 mmol, 1 eq). The solution was then heated at toluene reflux and the reaction monitored by TLC. After 21h and no signs of progression by TLC monitoring, the reaction was stopped and the volatiles removed by rotary-evaporation and dried under high-vacuum to afford 4.75 g of crude mixture. <sup>1</sup>H NMR spectrum of the crude mixture (Figure S148) was found to be the superposition of the <sup>1</sup>H NMR spectrum of the two starting materials and no change was observed.

## General procedure for the preparation of sodium propylthiolate

In a dried 250 mL round bottom flask under gentle argon flow was degreased NaH (60% in mineral oil, 1.8g, 45 mmol, 0.9 eq) with 5 x 20 mL of hexane (HPLC quality). Toluene (100 mL) was added and the solution was cooled at 0 °C. Then, *n*-propylthiol (4.53 mL, 50 mmol, 1 eq) was very slowly introduced with a syringe. The formation of a white salt was quickly observed. Volatiles (toluene & unreacted *n*-propylthiol) were removed by rotary evaporation to afford sodium propylthiolate as a white salt.

## Synthesis of 1-[[2,2-dimethoxy-1,6-dioxo-2-silacyclooct-8-yl)methyl]thio]propane (**8**) and 3,3-dimethoxy-2,7-dioxa-11-thia-3-silatetradecan-9-ol (**9**)

In a dried 10 mL round bottom flask under gentle argon flow was introduced toluene (6.25 mL), sodium propane-1-thiolate (491 mg, 5 mmol, 1 eq) beforehand prepared from propan-1-thiol and NaH, and GPTMS (1.104 mL, 5 mmol, 1 eq). After 3.5h at room temperature, TLC (80:20, PE/AcOEt) indicates that GPTMS was totally converted. The solution was then concentrated by rotary evaporation and dried under high-vacuum to afford 2.16 g. One gram of residue was purified by flash chromatography on a 40g/40µm SiO<sub>2</sub> column with liquid injection and gradient elution (100:0-53:47, PE/AcOEt) and afforded **8** (42 mg, 6.5%) and **9** (50 mg, 6.9%) as pure, colorless oils.

### 1-[[2,2-dimethoxy-1,6-dioxo-2-silacyclooct-8-yl)methyl]thio]propane (**8**)

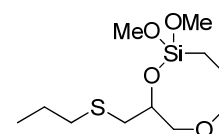

<sup>1</sup>H NMR (400.16 MHz, CDCl<sub>3</sub>, 20°C): δ = 4.17(m, 1H, CH<sub>2</sub>-CH-CH<sub>2</sub>); 3.84(dd, *J* = 10.9 & 2.7 Hz, 1H, CH<sub>2</sub>-CH-CH<sub>2</sub>-O); 3.65(m, 1H, O-CH<sub>2</sub>-CH<sub>2</sub>); 3.58(s, 3H, CH<sub>3</sub>-O-Si); 3.55(s, 3H, CH<sub>3</sub>-O-Si); 3.49(m, 1H, O-CH<sub>2</sub>-CH<sub>2</sub>); 3.21(dd, *J* = 10.8 & 9.9 Hz, 1H, CH<sub>2</sub>-CH-CH<sub>2</sub>-O); 2.65(dd, *J* = 13.4 & 6.3 Hz, 1H, S-CH<sub>2</sub>-CH-CH<sub>2</sub>); 2.55(t, *J* = 7.4 Hz, 2H, CH<sub>3</sub>-CH<sub>2</sub>-CH<sub>2</sub>-S); 2.54(dd, *J* = 13.0 & 6.7 Hz, 1H, S-CH<sub>2</sub>-CH-CH<sub>2</sub>); 1.80(m, 1H, CH<sub>2</sub>-CH<sub>2</sub>-Si); 1.71(m, 1H, CH<sub>2</sub>-CH<sub>2</sub>-Si); 1.60(sx, *J* = 7.3 Hz, 2H, CH<sub>3</sub>-CH<sub>2</sub>-CH<sub>2</sub>-S); 0.96(t, *J* = 7.3 Hz, 3H, CH<sub>3</sub>-CH<sub>2</sub>-CH<sub>2</sub>-S); 0.73(m, 2H, CH<sub>2</sub>-CH<sub>2</sub>-Si) ppm. <sup>13</sup>C NMR (100.61 MHz, CDCl<sub>3</sub>, 20°C): δ = 74.57(CH-CH<sub>2</sub>-O); 72.88(CH<sub>2</sub>-CH-CH<sub>2</sub>); 72.69(CH-CH<sub>2</sub>-O-CH<sub>2</sub>); 50.72(CH<sub>3</sub>-O-Si); 50.54(CH<sub>3</sub>-O-Si); 35.33(CH<sub>3</sub>-CH<sub>2</sub>); 35.09(S-CH<sub>2</sub>-CH); 24.15(CH<sub>2</sub>-CH<sub>2</sub>-Si); 23.13(CH<sub>3</sub>-CH<sub>2</sub>); 13.54(CH<sub>2</sub>-CH<sub>2</sub>-S); 7.41(CH<sub>2</sub>-Si) ppm. HRMS (ESI): *m/z* calcd for C<sub>11</sub>H<sub>24</sub>O<sub>4</sub>NaSi [M+Na<sup>+</sup>] 303.10568, found 303.10492.

### 3,3-dimethoxy-2,7-dioxa-11-thia-3-silatetradecan-9-ol (**9**)

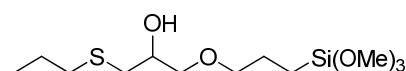

# SI\_7

$^1\text{H}$  NMR (400.16 MHz,  $\text{CDCl}_3$ ,  $20^\circ\text{C}$ ):  $\delta$  = 3.85(m, 1H,  $\text{CH}_2\text{-CH-CH}_2$ ); 3.55(s, 9H,  $\text{CH}_3\text{-O-Si}$ ); 3.55(s, 3H,  $\text{CH}_3\text{-O-Si}$ ); 3.51(dd,  $J$  = 9.6 & 4.0 Hz, 1H,  $\text{CH}_2\text{-CH-CH}_2\text{-O}$ ); 3.48-3.40(m, 3H,  $\text{CH-CH}_2\text{-O-CH}_2\text{-CH}_2$ ); 2.89(d,  $J$  = 4.0 Hz, 1H,  $\text{CH-OH}$ ); 2.68(dd,  $J$  = 13.6 & 5.6 Hz, 1H,  $\text{S-CH}_2\text{-CH-CH}_2$ ); 2.59(dd,  $J$  = 13.6 & 7.0 Hz, 1H,  $\text{S-CH}_2\text{-CH-CH}_2$ ); 2.51(t,  $J$  = 7.2 Hz, 2H,  $\text{CH}_3\text{-CH}_2\text{-CH}_2\text{-S}$ ); 1.69(m, 2H,  $\text{CH}_2\text{-CH}_2\text{-Si}$ ); 1.60(sx,  $J$  = 7.3 Hz, 2H,  $\text{CH}_3\text{-CH}_2\text{-CH}_2\text{-S}$ ); 0.97(t,  $J$  = 7.3 Hz, 3H,  $\text{CH}_3\text{-CH}_2\text{-CH}_2\text{-S}$ ); 0.66(m, 2H,  $\text{CH}_2\text{-CH}_2\text{-Si}$ ) ppm.  $^{13}\text{C}$  NMR (100.61 MHz,  $\text{CDCl}_3$ ,  $20^\circ\text{C}$ ):  $\delta$  = 73.53( $\text{CH-CH}_2\text{-O}$ ); 73.50( $\text{O-CH}_2\text{-CH}_2$ ); 69.40( $\text{CH}_2\text{-CH-CH}_2$ ); 50.65( $\text{CH}_3\text{-O-Si}$ ); 35.88( $\text{S-CH}_2\text{-CH}$ ); 34.83( $\text{CH}_3\text{-CH}_2$ ); 23.14( $\text{CH}_3\text{-CH}_2$ ); 22.93( $\text{CH}_2\text{-CH}_2\text{-Si}$ ); 13.52( $\text{CH}_2\text{-CH}_2\text{-S}$ ); 5.56( $\text{CH}_2\text{-Si}$ ) ppm. HRMS (ESI):  $m/z$  calcd for  $\text{C}_{12}\text{H}_{28}\text{O}_5\text{NaSi}$  [ $M+\text{Na}^+$ ] 335.13189, found 335.13074.

## Synthesis of 1-[[2,2-diethoxy-1,6-dioxo-2-silacyclooct-8-yl)methyl]thio]propane (10) and 4,4-diethoxy-3,8-dioxa-12-thia-4-silapentadecan-10-ol (11)

In a dried 10 mL round bottom flask under gentle argon flow was introduced toluene (6.25 mL), sodium propane-1-thiolate (491 mg, 5 mmol, 1 eq) beforehand prepared from propan-1-thiol and NaH, and GPTES (1.33 mL, 5 mmol, 1 eq). After 20h at room temperature, TLC (80:20, PE/AcOEt) indicates that GPTES was totally converted. The solution was then concentrated by rotary evaporation and dried under vacuum to afford 1.49 g. One gram of residue was purified by flash chromatography on a 40g/40 $\mu\text{m}$   $\text{SiO}_2$  column with liquid deposition and gradient elution (100:0-87:13, PE/AcOEt) and afforded **10** (16 mg, 1.5%) and **11** (248 mg, 21%) as pure colorless oils.

1-[[2,2-diethoxy-1,6-dioxo-2-silacyclooct-8-yl)methyl]thio]propane (**10**)

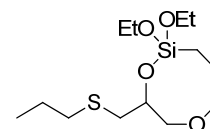

$R_f$  = 0.53 (80:20, PE/AcOEt);  $^1\text{H}$  NMR (400.16 MHz,  $\text{CDCl}_3$ ,  $20^\circ\text{C}$ ):  $\delta$  = 4.17(m, 1H,  $\text{CH}_2\text{-CH-CH}_2$ ); 3.84(q,  $J$  = 7.1 Hz, 4H,  $\text{CH}_3\text{-CH}_2\text{-O-Si}$ ); 3.83(m, 1H,  $\text{CH}_2\text{-CH-CH}_2\text{-O}$ ); 3.65(ddd,  $J$  = 11.6, 8.3 & 3.6 Hz, 1H,  $\text{O-CH}_2\text{-CH}_2$ ); 3.51(ddd,  $J$  = 10.8, 4.8 & 3.8 Hz, 1H,  $\text{O-CH}_2\text{-CH}_2$ ); 3.22(dd,  $J$  = 11.0 & 9.8 Hz, 1H,  $\text{CH}_2\text{-CH-CH}_2\text{-O}$ ); 2.65(dd,  $J$  = 13.5 & 6.2 Hz, 1H,  $\text{S-CH}_2\text{-CH-CH}_2$ ); 2.55(t,  $J$  = 7.3 Hz, 2H,  $\text{CH}_3\text{-CH}_2\text{-CH}_2\text{-S}$ ); 2.54(dd,  $J$  = 13.4 & 6.4 Hz, 1H,  $\text{S-CH}_2\text{-CH-CH}_2$ ); 1.80(m, 1H,  $\text{CH}_2\text{-CH}_2\text{-Si}$ ); 1.71(m, 1H,  $\text{CH}_2\text{-CH}_2\text{-Si}$ ); 1.61(sx,  $J$  = 7.3 Hz, 2H,  $\text{CH}_3\text{-CH}_2\text{-CH}_2\text{-S}$ ); 1.24(t,  $J$  = 7.0 Hz, 3H,  $\text{CH}_3\text{-CH}_2\text{-O-Si}$ ); 1.22(t,  $J$  = 7.0 Hz, 3H,  $\text{CH}_3\text{-CH}_2\text{-O-Si}$ ); 0.99(t,  $J$  = 7.3 Hz, 3H,  $\text{CH}_3\text{-CH}_2\text{-CH}_2\text{-S}$ ); 0.73(m, 2H,  $\text{CH}_2\text{-CH}_2\text{-Si}$ ) ppm.  $^{13}\text{C}$  NMR (100.61 MHz,  $\text{CDCl}_3$ ,  $20^\circ\text{C}$ ):  $\delta$  = 74.72( $\text{CH-CH}_2\text{-O-CH}_2$ ); 72.83( $\text{CH-CH}_2\text{-O-CH}_2$ ); 72.76( $\text{CH}_2\text{-CH-CH}_2$ ); 58.57( $\text{Si-O-CH}_2\text{-CH}_2$ ); 58.44( $\text{Si-O-CH}_2\text{-CH}_2$ ); 35.35( $\text{S-CH}_2\text{-CH}_2$ ); 35.19( $\text{S-CH}_2\text{-CH}$ ); 24.30( $\text{CH}_2\text{-CH}_2\text{-Si}$ ); 23.16( $\text{S-CH}_2\text{-CH}_2$ ); 18.50( $\text{CH}_3\text{-CH}_2\text{-O}$ ); 18.45( $\text{CH}_3\text{-CH}_2\text{-O}$ ); 13.57( $\text{CH}_3\text{-CH}_2\text{-CH}_2\text{-S}$ ); 8.42( $\text{CH}_2\text{-Si}$ ) ppm. HRMS (ESI):  $m/z$  calcd for  $\text{C}_{13}\text{H}_{28}\text{O}_4\text{NaSi}$  [ $M+\text{Na}^+$ ] 331.13698, found 331.13617.

4,4-diethoxy-3,8-dioxa-12-thia-4-silapentadecan-10-ol (**11**)

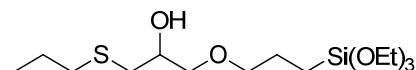

$R_f$  = 0.23 (80:20, PE/AcOEt).  $^1\text{H}$  NMR (400.16 MHz,  $\text{CDCl}_3$ ,  $20^\circ\text{C}$ ):  $\delta$  = 3.83(m, 1H,  $\text{CH}_2\text{-CH-CH}_2$ ); 3.82(t,  $J$  = 7.0 Hz, 6H,  $\text{CH}_3\text{-CH}_2\text{-O-Si}$ ); 3.51(dd,  $J$  = 9.6 & 4.0 Hz, 1H,  $\text{CH}_2\text{-CH-CH}_2\text{-O}$ ); 3.48-3.40(m, 3H,  $\text{CH-CH}_2\text{-O-CH}_2\text{-CH}_2$ ); 2.78(d,  $J$  = 3.9 Hz,  $\text{CH-OH}$ ); 2.65(dd,  $J$  = 13.6 & 5.6 Hz, 1H,  $\text{S-CH}_2\text{-CH-CH}_2$ ); 2.60(dd,  $J$  = 13.6 & 7.1 Hz, 1H,  $\text{S-CH}_2\text{-CH-CH}_2$ ); 2.52(t,  $J$  = 7.3 Hz, 2H,  $\text{CH}_3\text{-CH}_2\text{-CH}_2\text{-S}$ ); 1.70(m, 2H,  $\text{CH}_2\text{-CH}_2\text{-Si}$ ); 1.61(sx,  $J$  = 7.3 Hz, 2H,  $\text{CH}_3\text{-CH}_2\text{-CH}_2\text{-S}$ ); 1.22(t,  $J$  = 7.0 Hz, 6H,  $\text{CH}_3\text{-CH}_2\text{-O-Si}$ ); 0.99(t,  $J$  = 7.3 Hz, 3H,  $\text{CH}_3\text{-CH}_2\text{-CH}_2\text{-S}$ ); 0.73(m, 2H,  $\text{CH}_2\text{-CH}_2\text{-Si}$ ) ppm.  $^{13}\text{C}$  NMR (100.61 MHz,  $\text{CDCl}_3$ ,  $20^\circ\text{C}$ ):  $\delta$  = 73.77( $\text{CH-CH}_2\text{-O-CH}_2$ ); 73.48( $\text{CH-CH}_2\text{-O-CH}_2$ ); 69.39( $\text{CH}_2\text{-CH-CH}_2$ ); 58.53( $\text{CH}_3\text{-CH}_2\text{-O}$ ); 35.97( $\text{S-CH}_2\text{-CH}$ ); 34.83( $\text{CH}_3\text{-CH}_2\text{-O}$ ); 23.15( $\text{CH}_2\text{-CH}_2\text{-Si}$  &  $\text{S-CH}_2\text{-CH}_2$ ); 18.43 ( $\text{CH}_3\text{-CH}_2\text{-O}$ ); 13.54( $\text{CH}_3\text{-CH}_2\text{-CH}_2\text{-S}$ ); 6.78( $\text{CH}_2\text{-Si}$ ) ppm. HRMS (ESI):  $m/z$  calcd for  $\text{C}_{15}\text{H}_{34}\text{O}_5\text{NaSi}$  [ $M+\text{Na}^+$ ] 377.17884, found 377.17783.

# SI\_8

## General procedure for the reaction of sodium azide with glycidyl silanes in methanol

*For  $^1\text{H}$  NMR monitoring and  $^{13}\text{C}$  analysis:*

In a dried 25 mL two-neck round bottom flask equipped with a condenser and under gentle argon flow was introduced deuterated methanol (7 mL),  $\text{NaN}_3$  (0.25 g, 3.85 mmol, 6.7 eq) and the mixture was heated to reflux. Then, a solution of GPTMS (0.136 mL, 0.58 mmol, 1 eq) in deuterated methanol (3 mL) was injected. The mixture was stirred at reflux and the  $^1\text{H}$  NMR kinetic study was realized by directly sampling 0.6 mL of mixture at  $t = 5$  min, 30 min, 1h, 2h, 3h, 5h. The  $^{13}\text{C}$  NMR spectrum was acquired on the 5h sample with a 500 MHz NMR spectrometer fitted with a 5 mm i.d.  $^{13}\text{C}/^1\text{H}$  dual cryoprobe, probe temperature set at 303 K.

*For MS analyses:*

In a dried 25 mL two-neck round bottom flask equipped with a condenser and under gentle argon flow was introduced methanol (7 mL, anhydrous, 99.8%, Sigma-Aldrich, Sure/Seal™),  $\text{NaN}_3$  (0.25 g, 3.85 mmol, 6.7 eq) and the mixture was heated at reflux. Then, a solution of GPTMS (0.136 mL, 0.58 mmol, 1 eq) in methanol (3 mL, anhydrous, 99.8%, Sigma-Aldrich, Sure/Seal™) was injected. The solution was stirred at reflux for 5h and was directly analyzed by Electrospray Mass Spectrometry (ESI-MS).

## General procedure for the reaction of sodium azide with glycidyl silanes in DMF

In a dried 25 mL two-neck round bottom flask equipped with a condenser and under gentle argon flow was introduced DMF (10 mL, anhydrous, 99.8%, Sigma-Aldrich, Sure/Seal™),  $\text{NaN}_3$  (0.25 g, 3.85 mmol, 6.7 eq) and the mixture was heated at 70 °C. Then, GPTMS (0.136 mL, 0.58 mmol, 1 eq) was added. The solution was stirred at 70 °C and the  $^1\text{H}$  NMR kinetic study was realized by directly sampling 0.6 mL of mixture at  $t = 0$  min, 5 min, 30 min, 1h, 2h, 3h, 4h, 5h, 6h and the MS analyses were performed on the 6h sample.

## General procedures for the reactions of sodium alkoxide on glycidyl alkoxysilanes in THF and under mild conditions

*Sodium ethoxide with GPTMS:*

In a dried 50 mL round bottom flask under gentle argon flow was introduced freshly distilled THF (16 mL), sodium ethoxide (0.340 g, 5 mmol, 1 eq) and GPTES (1.392 g, 5 mmol, 1 eq). The reaction was left to stir at room temperature under positive argon atmosphere and followed by TLC (60:40, PE/AcOEt). The reaction was stopped after 5 h, the salts were eliminated by filtration under  $\text{N}_2$  atmosphere and the solution was concentrated off to afford 714 mg of crude mixture.

*Sodium methoxide with GPTES:*

In a dried 50 mL round bottom flask under gentle argon flow was introduced freshly distilled THF (16 mL), sodium methoxide (0.270 g, 5 mmol, 1 eq) and GPTMS (1.182 g, 5 mmol, 1 eq). The reaction was left to stir at room temperature under positive argon atmosphere and followed by TLC (60:40, PE/AcOEt). The reaction was stopped after 8 h, the salts were eliminated by filtration under  $\text{N}_2$  atmosphere and the solution was concentrated off to afford 992 mg of crude mixture.

## Reaction of sodium methoxide with GPTMS in refluxing methanol

In a dried 25 mL two-neck round bottom flask equipped with a condenser and under gentle argon flow was introduced freshly distilled methanol (8.1 mL) and a freshly prepared 0.1M solution of sodium methoxide in methanol (9.05 mL, 0.905 mmol, 1 eq). Then GPTMS (0.200 mL, 0.905 mmol, 1 eq) was injected and the reaction was left refluxing under positive argon atmosphere for 3.5h. The reaction

# SI\_9

was then stopped, the salts were eliminated by filtration under N<sub>2</sub> atmosphere and the solution concentrated off to afford 227 mg of crude mixture.

**General procedures for the activated reactions of *tert*-butylglycidylether in presence of *n*-propanol leading to 1-(*tert*-butoxy)-3-propoxypropan-2-ol (12a), 3-(*tert*-butoxy)-2-propoxypropan-1-ol (12b) and 1-(*tert*-butoxy)-3-chloropropan-2-ol (12c).**

*Copper(II) tetrafluoroborate:*

In a dried round bottom flask under gentle argon flow was introduced toluene, *tert*-butylglycidylether, propan-1-ol, and then was quickly added dry copper(II) tetrafluoroborate. The reaction was left to stir under positive argon atmosphere and followed by TLC (65:35, PE/AcOEt). After 6h, two compounds ( $R_f = 0.61, 0.52$ ) began to appear and the reaction was left over-night. The reaction was quenched by addition of water (30 mL), the layers were separated and the aqueous layer extracted with petroleum ether (10 mL x 3). The combined organic layers were washed with brine (20 mL), dried over MgSO<sub>4</sub>, concentrated by rotary evaporation and dried under high-*vacuum*. The crude was purified by flash chromatography with silica gel, solid loading, and gradient elution (90:10-80:20, PE/Et<sub>2</sub>O).

*Boron trifluoride diethyl etherate:*

In a dried round bottom flask under a gentle argon flow was introduced freshly distilled DCM, *tert*-butylglycidylether, propan-1-ol and then was quickly injected BF<sub>3</sub>•Et<sub>2</sub>O. The reaction was left to stir under positive argon atmosphere and followed by TLC (65:35, PE/AcOEt). After 4h, *tert*-butylglycidylether ( $R_f = 0.70$ ) was converted into two compounds ( $R_f = 0.61$  &  $0.52$  respectively). The reaction was thus quenched by addition of water (30 mL), the layers were separated and the aqueous layer extracted with DCM (10 mL x 3). The combined organic layers were dried over MgSO<sub>4</sub>, concentrated by rotary evaporation and dried under high-*vacuum*. The crude was purified by combi-flash chromatography with solid loading and gradient elution (96:4-80:20, PE/AcOEt).

*Zinc(II) Chloride:*

In a dried round bottom flask under a gentle argon flow was introduced freshly distilled DCM, *tert*-butylglycidylether, propan-1-ol, and then was quickly added dry zinc(II) chloride. The reaction was left to stir under positive argon atmosphere and followed by TLC (65:35, PE/AcOEt). After 24h, only traces amount of *tert*-butylglycidylether ( $R_f = 0.70$ ) was visible on TLC. The reaction was thus quenched by addition of brine (10 mL). The layers were separated and the organic layers were washed with brine (10 mL), water (10 mL), dried over MgSO<sub>4</sub>, concentrated by rotary evaporation and dried under high-*vacuum*. The crude was purified by combi-flash chromatography with solid loading and isocratic elution (88:12, PE/AcOEt).

1-(*tert*-butoxy)-3-propoxypropan-2-ol (**12a**)

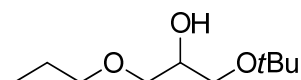

$R_f = 0.61$  (65:35, PE/AcOEt). <sup>1</sup>H NMR (300.16 MHz, CDCl<sub>3</sub>, 20°C):  $\delta = 3.86$ (m, 1H, CH<sub>2</sub>-CH-CH<sub>2</sub>); 3.51-3.33(m, 6H, CH<sub>2</sub>-O-CH<sub>2</sub>-CH-CH<sub>2</sub>-O); 2.53(d,  $J = 4.3$  Hz, 1H, CH-OH); 1.59(sx,  $J = 7.2$  Hz, 2H, CH<sub>3</sub>-CH<sub>2</sub>); 1.19(s, 9H, CH<sub>3</sub>-C); 0.91(t,  $J = 7.4$  Hz, 3H, CH<sub>3</sub>-CH<sub>2</sub>) ppm. <sup>13</sup>C NMR (75.47 MHz, CDCl<sub>3</sub>, 20°C):  $\delta = 73.33$ (CH<sub>2</sub>-O-CH<sub>2</sub>-CH); 73.27(CH<sub>3</sub>-C); 72.00(CH<sub>2</sub>-O-CH<sub>2</sub>-CH); 69.94(CH-OH); 63.03(CH<sub>2</sub>-O-CH<sub>2</sub>-CH-CH<sub>2</sub>-O); 27.63(CH<sub>3</sub>-C); 22.95(CH<sub>3</sub>-CH<sub>2</sub>); 10.65(CH<sub>3</sub>-CH<sub>2</sub>) ppm. HRMS (ESI):  $m/z$  calcd for C<sub>10</sub>H<sub>22</sub>O<sub>3</sub>Na [ $M+Na^+$ ] 213.1467, found 213.1476.

# SI\_10

## 3-(tert-butoxy)-2-propoxypropan-1-ol (**12b**)

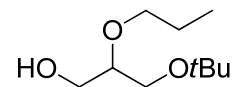

$R_f = 0.52$  (65:35, PE/AcOEt).  $^1\text{H NMR}$  (300.16 MHz,  $\text{CDCl}_3$ ,  $20^\circ\text{C}$ ):  $\delta = 3.76\text{--}3.35$ (m, 7H,  $\text{CH}_2\text{-O-CH}_2\text{-CH-CH}_2\text{-O}$ ); 2.40(t,  $J = 6.2$  Hz, 1H, CH-OH); 1.59(sx,  $J = 7.3$  Hz, 2H,  $\text{CH}_3\text{-CH}_2$ ); 1.18(s, 9H,  $\text{CH}_3\text{-C}$ ); 0.92(t,  $J = 7.4$  Hz, 3H,  $\text{CH}_3\text{-CH}_2$ ) ppm.  $^{13}\text{C NMR}$  (75.47 MHz,  $\text{CDCl}_3$ ,  $20^\circ\text{C}$ ):  $\delta = 78.52$ (CH-OH); 73.47( $\text{CH}_3\text{-C}$ ); 72.11( $\text{CH}_2\text{-CH}_2\text{-O}$ ); 63.62( $\text{CH}_2\text{-OH}$ ); 62.43( $\text{CH}_2\text{-OtBu}$ ); 27.50( $\text{CH}_3\text{-C}$ ); 23.40( $\text{CH}_3\text{-CH}_2$ ); 10.66( $\text{CH}_3\text{-CH}_2$ ) ppm. HRMS (ESI):  $m/z$  calcd for  $\text{C}_{10}\text{H}_{22}\text{O}_3\text{Na}$  [ $M+\text{Na}^+$ ] 213.14612, found 213.14557.

## 1-(tert-butoxy)-3-chloropropan-2-ol (**12c**)

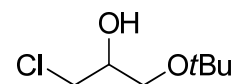

$R_f = 0.65$  (60:40, PE/AcOEt).  $^1\text{H NMR}$  (300.16 MHz,  $\text{CDCl}_3$ ,  $20^\circ\text{C}$ ):  $\delta = 3.89$ (m, 1H,  $\text{CH}_2\text{-CH-CH}_2$ ); 3.60(ddd,  $J = 17.9, 11.0$  &  $5.7$  Hz, 2H, Cl- $\text{CH}_2\text{-CH}$ ); 3.46(d,  $J = 5.0$  Hz, 2H, CH- $\text{CH}_2\text{-O}$ ); 2.60(d,  $J = 6.0$  Hz, CH-OH); 1.20(s, 9H,  $\text{CH}_3\text{-C}$ ) ppm.  $^{13}\text{C NMR}$  (75.47 MHz,  $\text{CDCl}_3$ ,  $20^\circ\text{C}$ ):  $\delta = 73.61$ ( $\text{CH}_3\text{-C}$ ); 70.70(CH-OH); 62.31(CH- $\text{CH}_2\text{-O}$ ); 46.00(Cl- $\text{CH}_2\text{-CH}$ ); 27.60( $\text{CH}_3\text{-C}$ ) ppm. HRMS (ESI):  $m/z$  calcd for  $\text{C}_7\text{H}_{15}\text{O}_2\text{ClNa}$  [ $M+\text{Na}^+$ ] 189.0658, found 189.0656.

## Synthesis of (3-glycidyloxypropyl)tripropoxysilane (**13a**), (3-glycidyloxypropyl)methoxydipropoxysilane (**13b**) & (3-glycidyloxypropyl)dimethoxypropoxysilane (**13c**)

In a dried 50 mL round bottom flask under gentle argon flow was introduced freshly distilled DCM (20 mL), propan-1-ol (3.74 mL, 50 mmol, 5 eq) and GPTMS (2.21 mL, 10 mmol, 1 eq). Then  $\text{BF}_3 \cdot \text{Et}_2\text{O}$  (37  $\mu\text{L}$ , 0.3 mmol, 0.03eq) was added and the reaction monitored by TLC (80:20, PE/AcOEt). After 1.5h at room temperature, TLC indicate that GPTMS ( $R_f = 0.31$ ) was totally converted into three compounds ( $R_f = 0.42$ ; 0.57 & 0.69 respectively). The solution was then concentrated by rotary evaporation and dried under high-*vacuum* to afford 2.76g. One gram of crude was purified by flash chromatography with silica gel as follow: 40 g  $\text{SiO}_2$ , liquid deposition, isocratic elution (92:8, PE/AcOEt) and afforded five fractions: **13a** (41 mg, pure, colorless oil, 3.5%), mix 11a/11b (154mg, colorless oil), **13b** (107mg, pure, colorless oil, 10.1%), mix 11b/11c (308mg, colorless oil), **13c** (176mg, pure, colorless oil, 18.4%).

## (3-glycidyloxypropyl)tripropoxysilane (**13a**)

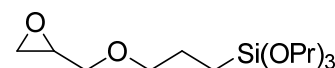

$R_f = 0.69$  (80:20, PE/AcOEt).  $^1\text{H NMR}$  (400.16 MHz,  $\text{CDCl}_3$ ,  $20^\circ\text{C}$ ):  $\delta = 3.69$ (t,  $J = 6.6$  Hz, 6H, Si-O- $\text{CH}_2\text{-CH}_2$ ); 3.68(dd,  $J = 11.1$  &  $3.3$  Hz, 1H, CH- $\text{CH}_2\text{-O}$ ); 3.46(m, 2H,  $\text{CH}_2\text{-O-CH}_2\text{-CH}_2$ ); 3.39(dd,  $J = 11.5$  &  $5.6$  Hz, 1H, CH- $\text{CH}_2\text{-O}$ ); 3.13(m, 1H,  $\text{CH}_2\text{-CH-CH}_2\text{-O}$ ); 2.78(dd,  $J = 5.0$  &  $4.3$  Hz, 1H,  $\text{CH}_2\text{-CH-CH}_2\text{-O}$ ); 2.60(dd,  $J = 5.0$  &  $2.7$  Hz, 1H,  $\text{CH}_2\text{-CH-CH}_2\text{-O}$ ); 1.70(m, 2H,  $\text{CH}_2\text{-CH}_2\text{-Si}$ ); 1.57(sx,  $J = 7.0$  Hz, 6H, O- $\text{CH}_2\text{-CH}_2\text{-CH}_3$ ); 0.90(t,  $J = 7.4$  Hz, 9H, - $\text{CH}_2\text{-CH}_3$ ); 0.64(m, 2H,  $\text{CH}_2\text{-CH}_2\text{-Si}$ ) ppm.  $^{13}\text{C NMR}$  (100.61 MHz,  $\text{CDCl}_3$ ,  $20^\circ\text{C}$ ):  $\delta = 73.99$ ( $\text{CH}_2\text{-O-CH}_2\text{-CH}_2$ ); 71.53(CH- $\text{CH}_2\text{-O}$ ); 64.56(Si-O- $\text{CH}_2\text{-CH}_2$ ); 51.01( $\text{CH}_2\text{-CH-CH}_2\text{-O}$ ); 44.51( $\text{CH}_2\text{-CH-CH}_2\text{-O}$ ); 25.85(O- $\text{CH}_2\text{-CH}_2\text{-CH}_3$ ); 23.21( $\text{CH}_2\text{-CH}_2\text{-Si}$ ); 10.36( $\text{CH}_2\text{-CH}_3$ ); 6.54( $\text{CH}_2\text{-CH}_2\text{-Si}$ ) ppm. HRMS (ESI):  $m/z$  calcd for  $\text{C}_{15}\text{H}_{32}\text{O}_5\text{NaSi}$  [ $M+\text{Na}^+$ ] 343.1917, found 343.1922.

## (3-glycidyloxypropyl)methoxydipropoxysilane (**13b**)

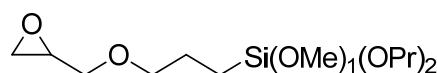

$R_f = 0.57$  (80:20, PE/AcOEt).  $^1\text{H NMR}$  (400.16 MHz,  $\text{CDCl}_3$ ,  $20^\circ\text{C}$ ):  $\delta = 3.69$ (t,  $J = 6.7$  Hz, 4H, Si-O- $\text{CH}_2\text{-CH}_2$ ); 3.68(dd,  $J = 11.4$  &  $3.6$  Hz, 1H, CH- $\text{CH}_2\text{-O}$ ); 3.53(s, 3H, Si-O- $\text{CH}_3$ ); 3.45(m, 2H,  $\text{CH}_2\text{-O-CH}_2\text{-CH}_2$ ); 3.38(dd,  $J = 11.6$  &  $5.8$  Hz, 1H, CH- $\text{CH}_2\text{-O}$ ); 3.13(m, 1H,  $\text{CH}_2\text{-CH-CH}_2\text{-O}$ ); 2.77(dd,  $J = 5.0$  &  $4.2$  Hz, 1H,  $\text{CH}_2\text{-CH-CH}_2\text{-O}$ ); 2.60(dd,  $J = 4.7$  &  $2.6$  Hz, 1H,  $\text{CH}_2\text{-CH-CH}_2\text{-O}$ ); 1.69(m, 2H,  $\text{CH}_2\text{-CH}_2\text{-Si}$ ); 1.57(sx,  $J = 7.3$  Hz, 6H, O- $\text{CH}_2\text{-CH}_2\text{-CH}_3$ ); 0.90(t,  $J = 7.4$  Hz, 9H, - $\text{CH}_2\text{-CH}_3$ ) ppm.  $^{13}\text{C NMR}$  (100.61 MHz,  $\text{CDCl}_3$ ,  $20^\circ\text{C}$ ):  $\delta = 73.99$ ( $\text{CH}_2\text{-O-CH}_2\text{-CH}_2$ ); 71.53(CH- $\text{CH}_2\text{-O}$ ); 64.56(Si-O- $\text{CH}_2\text{-CH}_2$ ); 51.01( $\text{CH}_2\text{-CH-CH}_2\text{-O}$ ); 44.51( $\text{CH}_2\text{-CH-CH}_2\text{-O}$ ); 25.85(O- $\text{CH}_2\text{-CH}_2\text{-CH}_3$ ); 23.21( $\text{CH}_2\text{-CH}_2\text{-Si}$ ); 10.36( $\text{CH}_2\text{-CH}_3$ ); 6.54( $\text{CH}_2\text{-CH}_2\text{-Si}$ ) ppm. HRMS (ESI):  $m/z$  calcd for  $\text{C}_{16}\text{H}_{34}\text{O}_6\text{NaSi}$  [ $M+\text{Na}^+$ ] 359.2067, found 359.2067.

# SI\_11

$\text{CH}_2\text{-CH}_3$ ); 0.90(t,  $J = 7.4$  Hz, 9H,  $\text{CH}_2\text{-CH}_3$ ); 0.64(m, 2H,  $\text{CH}_2\text{-CH}_2\text{-Si}$ ) ppm.  $^{13}\text{C}$  NMR (100.61 MHz,  $\text{CDCl}_3$ , 20°C):  $\delta = 73.85(\text{CH}_2\text{-O-CH}_2\text{-CH}_2)$ ; 71.50( $\text{CH-CH}_2\text{-O}$ ); 64.58( $\text{Si-O-CH}_2\text{-CH}_2$ ); 50.98( $\text{CH}_2\text{-CH-CH}_2\text{-O}$ ); 50.53( $\text{Si-O-CH}_3$ ); 44.45( $\text{CH}_2\text{-CH-CH}_2\text{-O}$ ); 25.82( $\text{O-CH}_2\text{-CH}_2\text{-CH}_3$ ); 23.10( $\text{CH}_2\text{-CH}_2\text{-Si}$ ); 10.31( $\text{CH}_2\text{-CH}_3$ ); 6.11( $\text{CH}_2\text{-CH}_2\text{-Si}$ ) ppm. HRMS (ESI):  $m/z$  calcd for  $\text{C}_{13}\text{H}_{28}\text{O}_5\text{NaSi}$  [ $M+\text{Na}^+$ ] 315.1604, found 315.1606.

(3-glycidyloxypropyl)dimethoxypropoxysilane (**13c**)

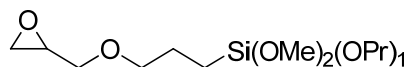

$R_f = 0.42$  (80:20, PE/AcOEt).  $^1\text{H}$  NMR (400.16 MHz,  $\text{CDCl}_3$ , 20°C):  $\delta = 3.69$ (t,  $J = 6.7$  Hz, 2H,  $\text{Si-O-CH}_2\text{-CH}_2$ ); 3.68(dd,  $J = 8.3$  & 3.2 Hz, 1H,  $\text{CH-CH}_2\text{-O}$ ); 3.54(s, 6H,  $\text{Si-O-CH}_3$ ); 3.45(m, 2H,  $\text{CH}_2\text{-O-CH}_2\text{-CH}_2$ ); 3.38(dd,  $J = 11.4$  & 5.7 Hz, 1H,  $\text{CH-CH}_2\text{-O}$ ); 3.13(m, 1H,  $\text{CH}_2\text{-CH-CH}_2\text{-O}$ ); 2.78(dd,  $J = 5.0$  & 4.3 Hz, 1H,  $\text{CH}_2\text{-CH-CH}_2\text{-O}$ ); 2.59(dd,  $J = 4.9$  & 2.7 Hz, 1H,  $\text{CH}_2\text{-CH-CH}_2\text{-O}$ ); 1.69(m, 2H,  $\text{CH}_2\text{-CH}_2\text{-Si}$ ); 1.57(sx,  $J = 7.3$  Hz, 2H,  $\text{O-CH}_2\text{-CH}_2\text{-CH}_3$ ); 0.90(t,  $J = 7.43$  Hz, 3H,  $\text{CH}_2\text{-CH}_3$ ); 0.64(m, 2H,  $\text{CH}_2\text{-CH}_2\text{-Si}$ ) ppm.  $^{13}\text{C}$  NMR (100.61 MHz,  $\text{CDCl}_3$ , 20°C):  $\delta = 73.75(\text{CH}_2\text{-O-CH}_2\text{-CH}_2)$ ; 71.50( $\text{CH-CH}_2\text{-O}$ ); 64.62( $\text{Si-O-CH}_2\text{-CH}_2$ ); 50.99( $\text{CH}_2\text{-CH-CH}_2\text{-O}$ ); 50.60( $\text{Si-O-CH}_3$ ); 44.45( $\text{CH}_2\text{-CH-CH}_2\text{-O}$ ); 25.79( $\text{O-CH}_2\text{-CH}_2\text{-CH}_3$ ); 22.99( $\text{CH}_2\text{-CH}_2\text{-Si}$ ); 10.31( $\text{CH}_2\text{-CH}_3$ ); 5.70( $\text{CH}_2\text{-CH}_2\text{-Si}$ ) ppm. HRMS (ESI):  $m/z$  calcd for  $\text{C}_{11}\text{H}_{24}\text{O}_5\text{NaSi}$  [ $M+\text{Na}^+$ ] 287.1291, found 287.1302.

**Synthesis of (3-glycidyloxypropyl)tripropoxysilane (13a), (3-glycidyloxypropyl)ethoxydipropoxysilane (14a) & (3-glycidyloxypropyl)diethoxypropoxysilane (14b)**

In a dried 50 mL round bottom flask under gentle argon flow was introduced freshly distilled DCM (16 mL), propan-1-ol (1.87 mL, 25 mmol, 5 eq) and GPTES (1.39 mL, 5 mmol, 1 eq). Then  $\text{BF}_3 \cdot \text{Et}_2\text{O}$  (60  $\mu\text{L}$ , 0.5 mmol, 0.1 eq) was added and the reaction monitored by TLC (90:10, PE/AcOEt). After 22h at room temperature, TLC indicates that GPTES was totally converted into three compounds ( $R_f = 0.48$ , 0.38 & 0.32 respectively). The mixture was then washed with brine (2x10 mL) and water (10 mL). The combined aqueous layers were extracted with DCM (10 mL). The combined organic layers were dried over  $\text{MgSO}_4$ , concentrated by rotary evaporation and dried under high-vacuum to afford 1.72 g. The residue was purified by combi-flash chromatography on a 120g/40 $\mu\text{m}$   $\text{SiO}_2$  column with liquid injection and gradient elution (96:4-90:10, PE/AcOEt) and afforded four fractions: **13a** (61 mg, pure, colorless oil, 4%), **14a** (453 mg, pure, colorless oil, 30%), mix 14a/14b (16mg, mix), **14b** (125 mg, pure, colorless oil, 9%).

(3-glycidyloxypropyl)ethoxydipropoxysilane (**14a**)

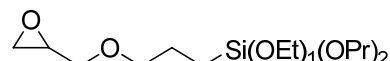

$R_f = 0.38$  (90:10, PE/AcOEt).  $^1\text{H}$  NMR (300.13 MHz,  $\text{CDCl}_3$ , 20°C):  $\delta = 3.81$ (q,  $J = 7.0$  Hz, 2H,  $\text{Si-O-CH}_2\text{-CH}_3$ ); 3.71(dd,  $J = 8.3$  & 3.0 Hz, 1H,  $\text{CH-CH}_2\text{-O-CH}_2$ ); 3.70(t,  $J = 6.7$  Hz, 4H,  $\text{Si-O-CH}_2\text{-CH}_2$ ); 3.47(ddd,  $J = 14.7$ , 9.2 & 6.9 Hz, 2H,  $\text{CH-CH}_2\text{-O-CH}_2$ ); 3.38(dd,  $J = 11.4$  & 5.7 Hz, 1H,  $\text{CH-CH}_2\text{-O-CH}_2$ ); 3.15(m, 1H,  $\text{CH}_2\text{-CH-CH}_2$ ); 2.80(dd,  $J = 5.0$  & 4.2 Hz, 1H,  $\text{CH}_2\text{-CH-CH}_2\text{-O}$ ); 2.61(dd,  $J = 5.0$  & 2.7 Hz, 1H,  $\text{CH}_2\text{-CH-CH}_2\text{-O}$ ); 1.71(m, 2H,  $\text{CH}_2\text{-CH}_2\text{-Si}$ ); 1.57(sx,  $J = 7.0$  Hz, 4H,  $\text{CH}_2\text{-CH}_2\text{-CH}_3$ ); 1.22(t,  $J = 7$  Hz, 3H,  $\text{CH}_2\text{-CH}_2\text{-CH}_3$ ); 0.90(t,  $J = 7.4$  Hz, 6H,  $\text{O-CH}_2\text{-CH}_3$ ); 0.64(m, 2H,  $\text{CH}_2\text{-Si}$ ) ppm.  $^{13}\text{C}$  NMR (75.47 MHz,  $\text{CDCl}_3$ , 20°C):  $\delta = 73.97(\text{CH-CH}_2\text{-O-CH}_2)$ ; 71.53( $\text{CH-CH}_2\text{-O-CH}_2$ ); 64.56( $\text{Si-O-CH}_2\text{-CH}_2$ ); 58.52( $\text{Si-O-CH}_2\text{-CH}_3$ ); 51.01( $\text{CH}_2\text{-CH-CH}_2$ ); 44.52( $\text{CH}_2\text{-CH-CH}_2\text{-O}$ ); 25.84( $\text{CH}_2\text{-CH}_2\text{-CH}_3$ ); 23.20( $\text{CH}_2\text{-CH}_2\text{-Si}$ ); 18.45( $\text{O-CH}_2\text{-CH}_3$ ); 10.36( $\text{CH}_2\text{-CH}_2\text{-CH}_3$ ); 6.58( $\text{CH}_2\text{-Si}$ ) ppm. HRMS (ESI):  $m/z$  calcd for  $\text{C}_{14}\text{H}_{30}\text{O}_5\text{NaSi}$  [ $M+\text{Na}^+$ ] 329.1760, found 329.1746.

(3-glycidyloxypropyl)diethoxypropoxysilane (**14b**)

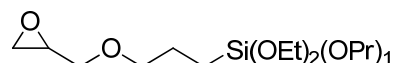

$R_f = 0.32$  (90:10, PE/AcOEt).  $^1\text{H}$  NMR (300.13 MHz,  $\text{CDCl}_3$ , 20°C):  $\delta = 3.81$ (q,  $J = 7.0$  Hz, 4H,  $\text{Si-O-CH}_2\text{-CH}_3$ ); 3.70(t,  $J = 6.7$  Hz, 2H,  $\text{Si-O-CH}_2\text{-CH}_2$ ); 3.69(dd,  $J = 11.5$  & 3.7 Hz, 1H,  $\text{CH-CH}_2\text{-O-CH}_2$ ); 3.47(ddd,  $J = 17.3$ , 9.3 & 6.9 Hz, 2H,  $\text{CH-CH}_2\text{-O-CH}_2$ ); 3.38(dd,  $J = 11.5$  & 5.7 Hz, 1H,  $\text{CH-CH}_2\text{-O-CH}_2$ ); 3.14(m, 1H,  $\text{CH}_2\text{-CH-CH}_2$ ); 2.80(dd,  $J = 5.0$  & 4.2 Hz, 1H,  $\text{CH}_2\text{-CH-CH}_2\text{-O}$ ); 2.61(dd,  $J = 5.0$  & 2.7 Hz, 1H,  $\text{CH}_2\text{-CH-CH}_2\text{-O}$ ); 1.71(m, 2H,  $\text{CH}_2\text{-CH}_2\text{-Si}$ ); 1.57(sx,  $J = 7.0$  Hz, 4H,  $\text{CH}_2\text{-CH}_2\text{-CH}_3$ ); 1.22(t,  $J = 7$  Hz, 3H,  $\text{CH}_2\text{-CH}_2\text{-CH}_3$ ); 0.90(t,  $J = 7.4$  Hz, 6H,  $\text{O-CH}_2\text{-CH}_3$ ); 0.64(m, 2H,  $\text{CH}_2\text{-Si}$ ) ppm.  $^{13}\text{C}$  NMR (75.47 MHz,  $\text{CDCl}_3$ , 20°C):  $\delta = 73.97(\text{CH-CH}_2\text{-O-CH}_2)$ ; 71.53( $\text{CH-CH}_2\text{-O-CH}_2$ ); 64.56( $\text{Si-O-CH}_2\text{-CH}_2$ ); 58.52( $\text{Si-O-CH}_2\text{-CH}_3$ ); 51.01( $\text{CH}_2\text{-CH-CH}_2$ ); 44.52( $\text{CH}_2\text{-CH-CH}_2\text{-O}$ ); 25.84( $\text{CH}_2\text{-CH}_2\text{-CH}_3$ ); 23.20( $\text{CH}_2\text{-CH}_2\text{-Si}$ ); 18.45( $\text{O-CH}_2\text{-CH}_3$ ); 10.36( $\text{CH}_2\text{-CH}_2\text{-CH}_3$ ); 6.58( $\text{CH}_2\text{-Si}$ ) ppm. HRMS (ESI):  $m/z$  calcd for  $\text{C}_{14}\text{H}_{30}\text{O}_5\text{NaSi}$  [ $M+\text{Na}^+$ ] 329.1760, found 329.1746.

# SI\_12

$CH-CH_2$ ); 2.79(dd,  $J = 5.0$  &  $4.2$  Hz, 1H,  $CH_2-CH-CH_2-O$ ); 2.61(dd,  $J = 5.0$  &  $2.7$  Hz, 1H,  $CH_2-CH-CH_2-O$ ); 1.70(m, 2H,  $CH_2-CH_2-Si$ ); 1.57(sx,  $J = 7.1$  Hz, 2H,  $CH_2-CH_2-CH_3$ ); 1.22(t,  $J = 7$  Hz, 6H,  $CH_2-CH_2-CH_3$ ); 0.90(t,  $J = 7.4$  Hz, 3H,  $O-CH_2-CH_3$ ); 0.64(m, 2H,  $CH_2-Si$ ) ppm.  $^{13}C$  NMR (75.47 MHz,  $CDCl_3$ ,  $20^\circ C$ ):  $\delta = 73.95(CH-CH_2-O-CH_2)$ ;  $71.53(CH-CH_2-O-CH_2)$ ;  $64.56(Si-O-CH_2-CH_2)$ ;  $58.52(Si-O-CH_2-CH_3)$ ;  $51.02(CH_2-CH-CH_2)$ ;  $44.51(CH_2-CH-CH_2-O)$ ;  $25.84(CH_2-CH_2-CH_3)$ ;  $23.18(CH_2-CH_2-Si)$ ;  $18.44(O-CH_2-CH_3)$ ;  $10.36(CH_2-CH_2-CH_3)$ ;  $6.61(CH_2-Si)$  ppm. HRMS (ESI):  $m/z$  calcd for  $C_{13}H_{28}O_5NaSi$  [ $M+Na^+$ ] 315.1604, found 315.1616.

## Synthesis of tetrakis(*n*-propoxypropan-2-ol)cyclomethylsiloxane (**15**)

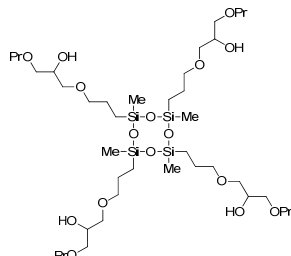

In a dried 50 mL round bottom flask under gentle argon flow was introduced freshly distilled DCM (16 mL), propan-1-ol (1.87 mL, 25 mmol, 5 eq) and PECS (1.39 mL, 5 mmol, 1 eq). Then  $BF_3 \cdot Et_2O$  (60  $\mu L$ , 0.5 mmol, 0.1 eq) was added and the reaction monitored by TLC (98:02,  $CHCl_3/MeOH$ ). After 3h at room temperature, TLC indicates that PECS ( $R_f = 0.7$ ) was totally converted into two compounds ( $R_f = 0.26$  &  $0.09$  respectively). The solution was then concentrated by rotary evaporation and was dried under high-*vacuum* to afford 1.17 g. The residue was purified by combi-flash chromatography on a 40g/40 $\mu m$   $SiO_2$  column with liquid injection and gradient elution (98:2-94:06,  $CHCl_3/MeOH$ ) and afforded the tetra substituted cyclosiloxane **15** (1.10 g, 94%) as a pure viscous colorless oil.

$R_f = 0.26$  (98:02,  $CHCl_3/MeOH$ ).  $^1H$  NMR (400.16 MHz,  $CDCl_3$ ,  $20^\circ C$ ): GG1-12F1:  $\delta = 3.95(m, 4H, CH(OH))$ ;  $3.60-3.35(m, 32H, CH_2-O-CH_2-CH(OH)-CH_2-O-CH_2)$ ;  $2.95-2.45(m, 4H, CH(OH))$ ;  $1.7-1.5(m, 8H, CH_2-CH_2-Si)$ ;  $1.59(sx, J = 7.1$  Hz, 8H,  $CH_3-CH_2-CH_2-O$ );  $0.91(t, J = 7.4$  Hz, 12H,  $CH_3-CH_2-CH_2-O$ );  $0.65(m, 8H, CH_2-Si)$ ;  $0.08(s, 12H, CH_3-Si)$  ppm.  $^{13}C$  NMR (100.61 MHz,  $CDCl_3$ ,  $20^\circ C$ ):  $\delta = 74.11, 73.37, 72.11$  &  $72.02(CH_2-O-CH_2-CH(OH)-CH_2-O-CH_2)$ ,  $69.65(CH(OH))$ ;  $23.23(CH_2-CH_2-Si)$ ;  $22.95(CH_3-CH_2-CH_2-O)$ ;  $13.23(CH_2-Si)$ ;  $10.64(CH_3-CH_2-CH_2-O)$ ;  $-0.56(CH_3-Si)$  ppm. HRMS (ESI):  $m/z$  calcd for  $C_{40}H_{88}O_{16}NaSi_4$  [ $M+Na^+$ ] 959.5042, found 959.5043.



## D. SPECTROSCOPIC DATA

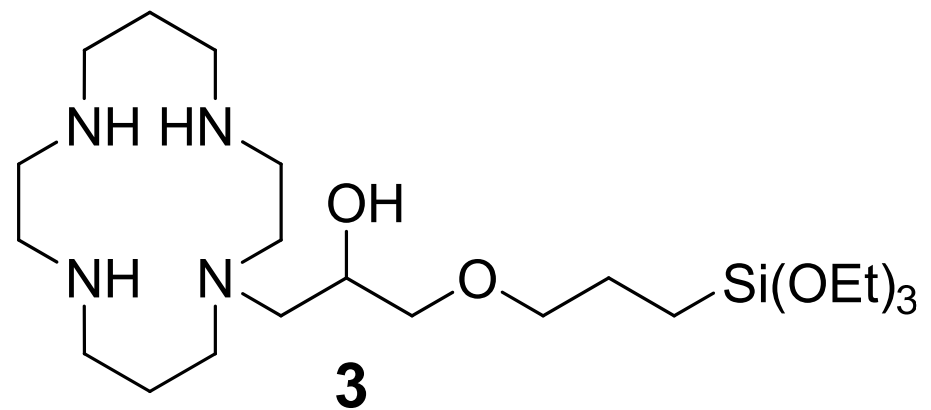

# SI\_14

XG2-141b 1H CDC13

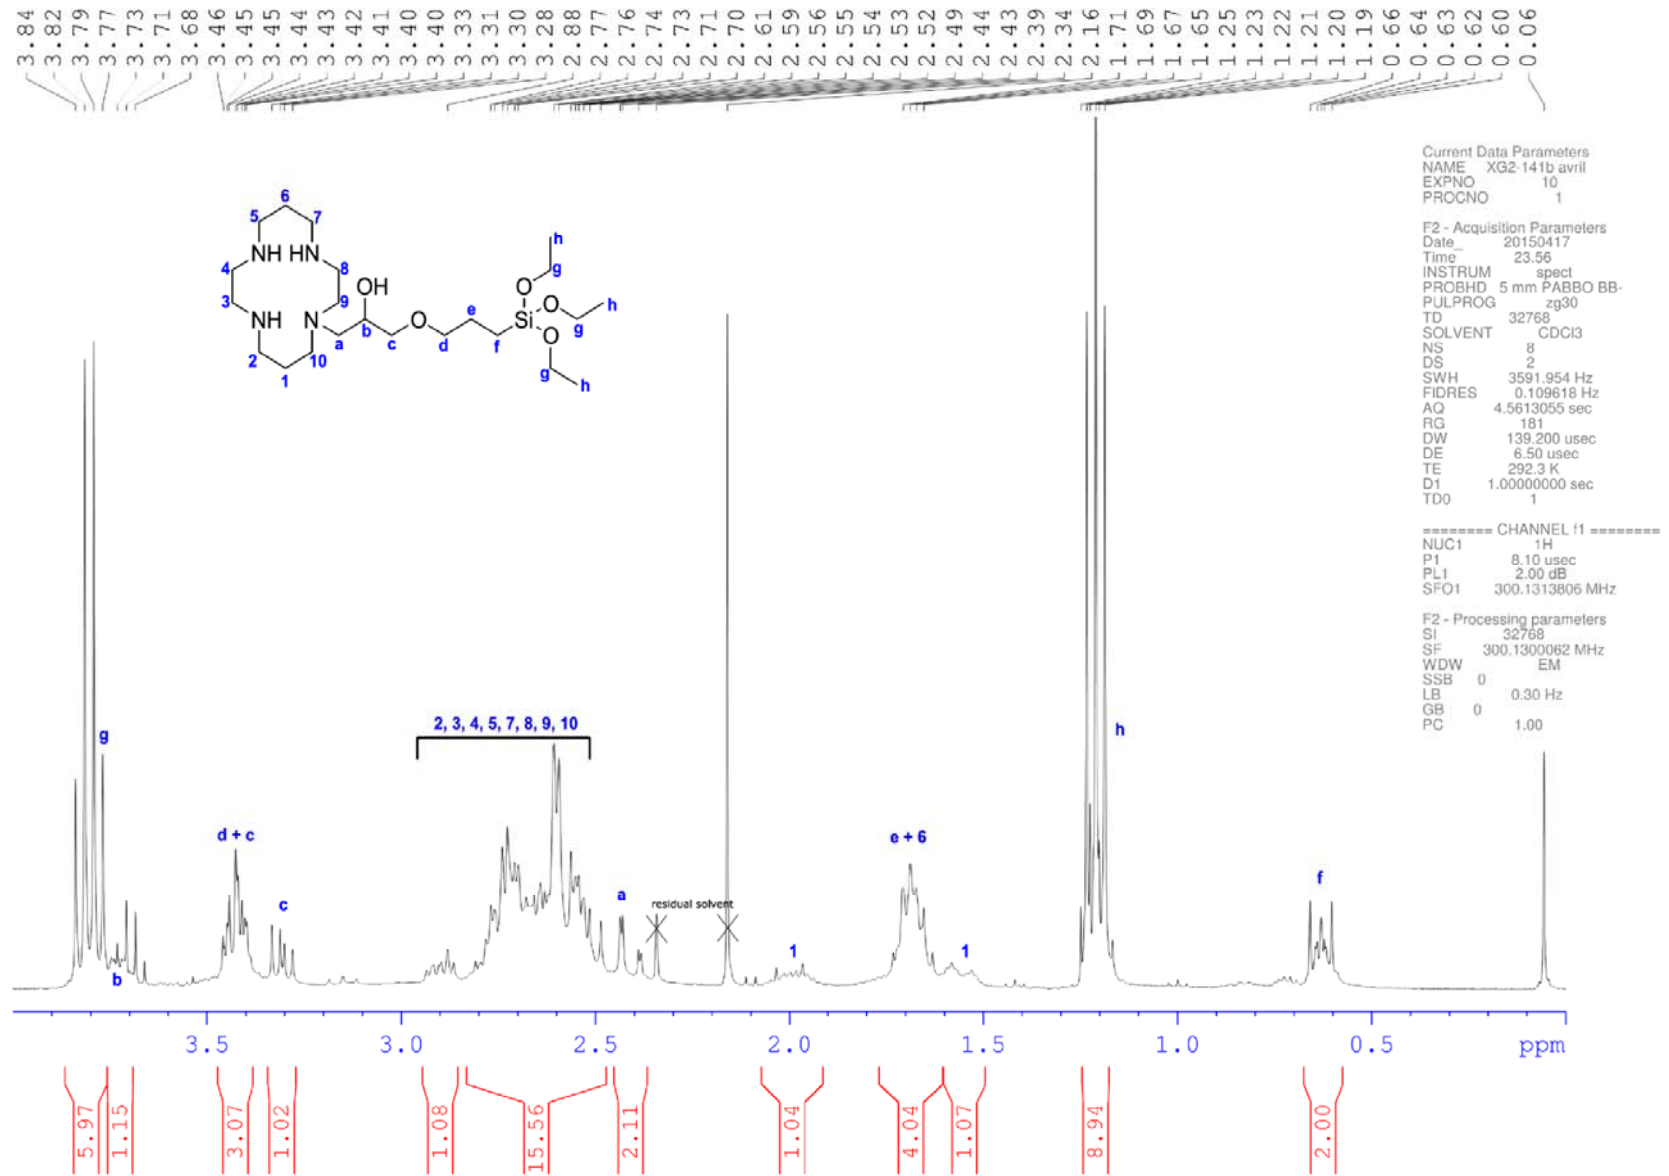

Figure SI\_14: <sup>1</sup>H NMR spectrum of compound 3

# SI\_15

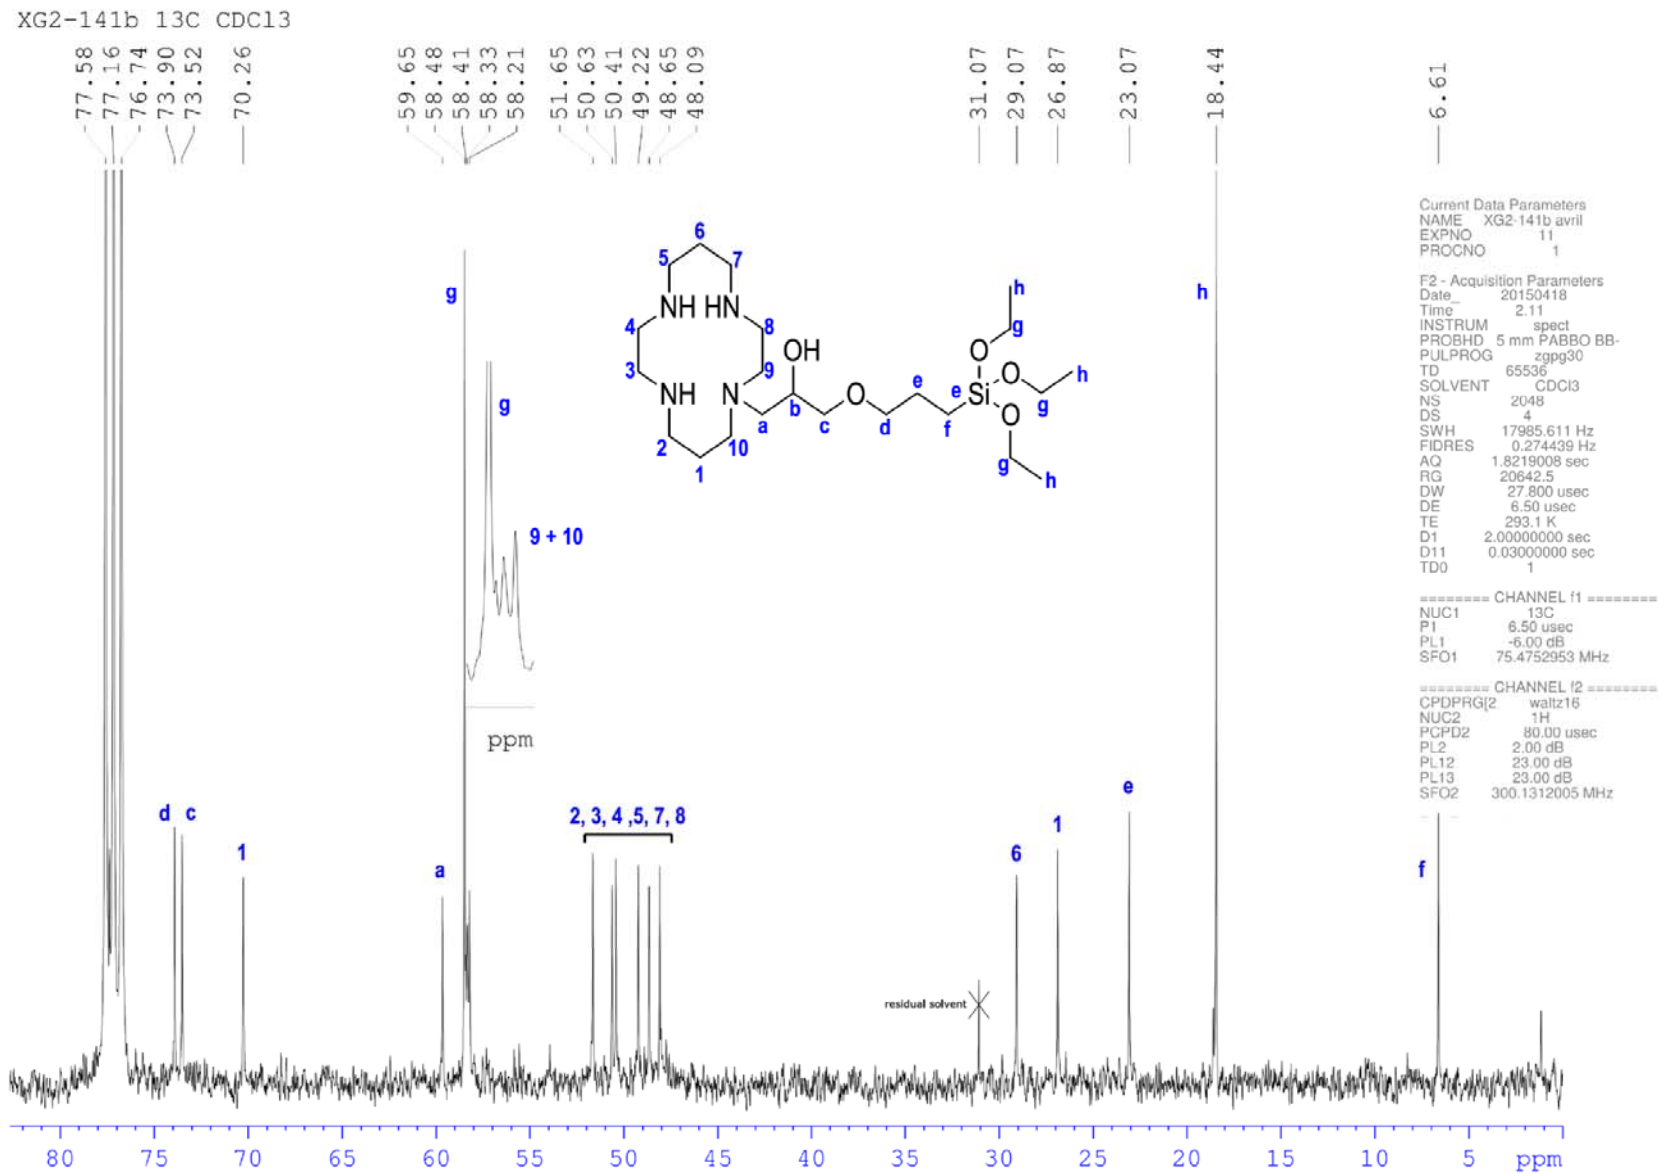

Figure SI\_15: <sup>13</sup>C NMR spectrum of compound 3

# SI\_16

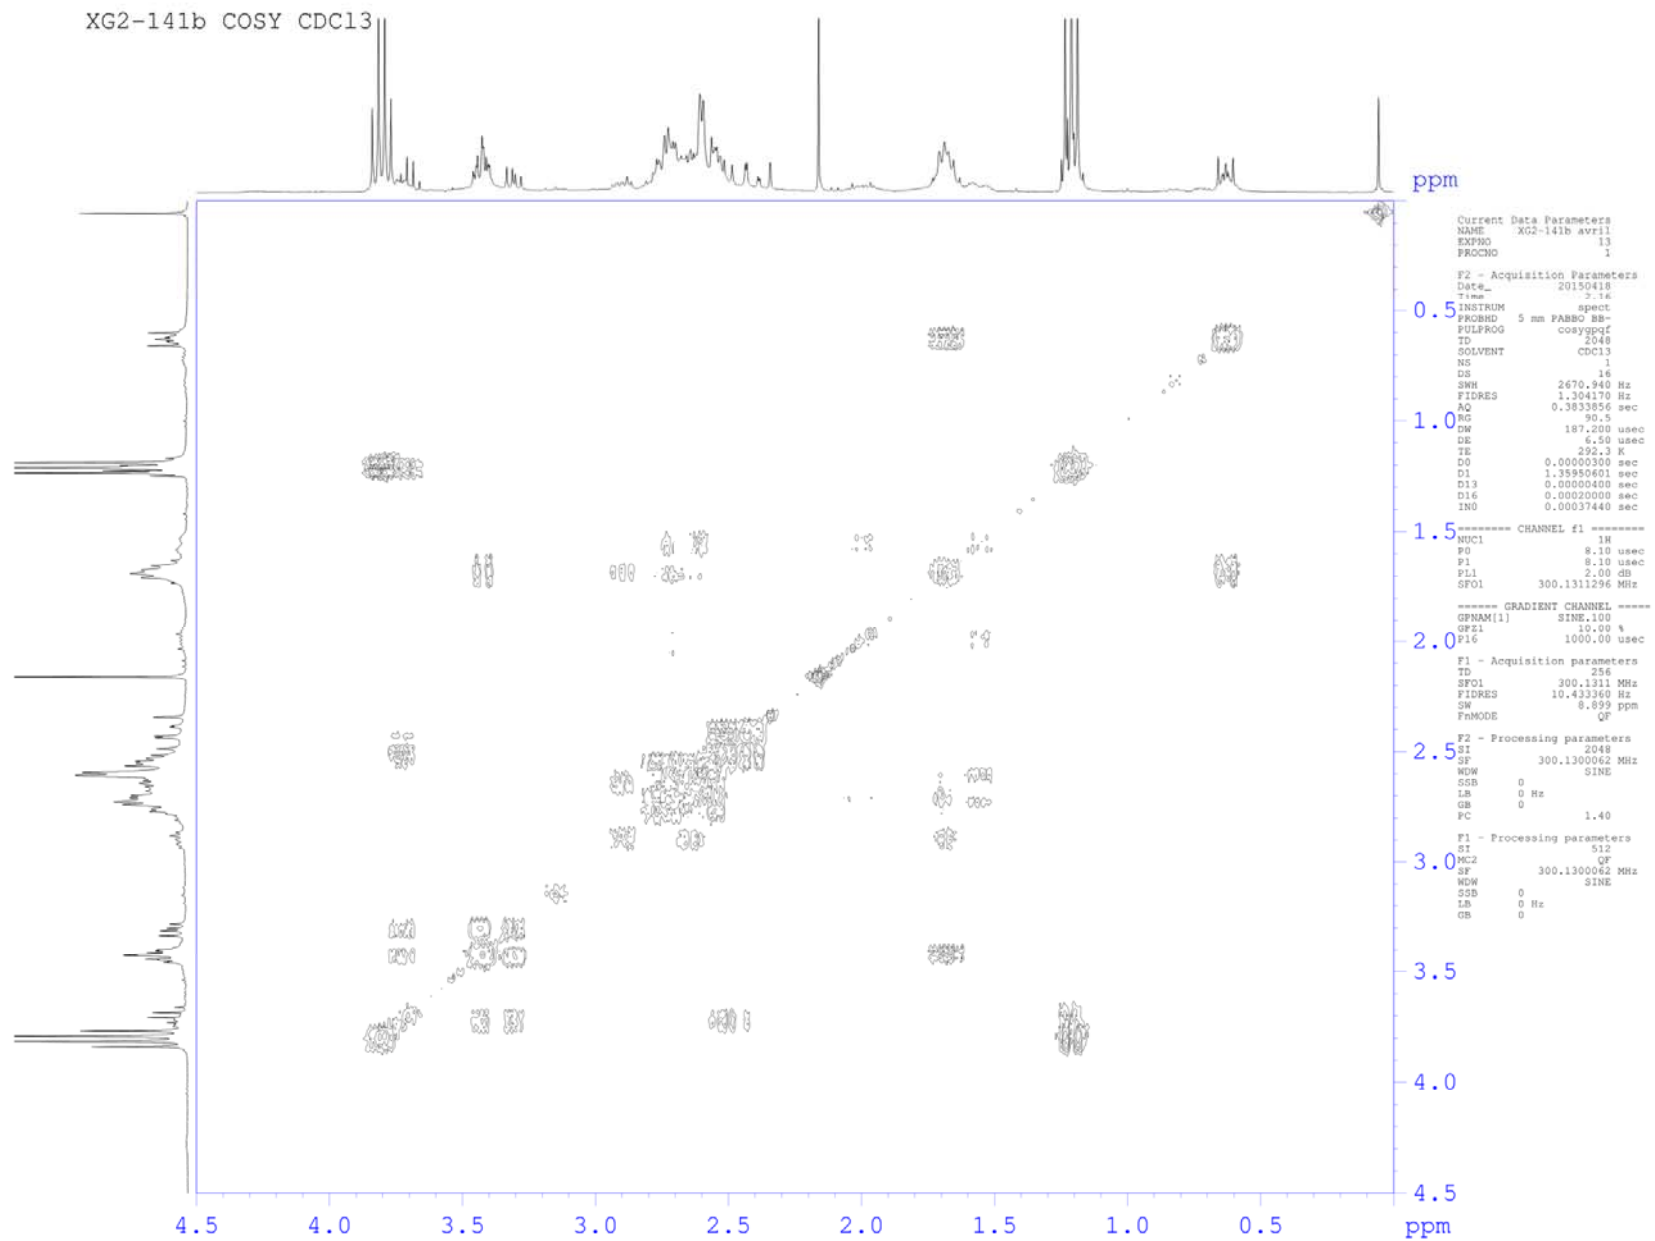

Figure SI\_16:  $^1\text{H}$  -  $^1\text{H}$  COSY of compound 3

# SI\_17

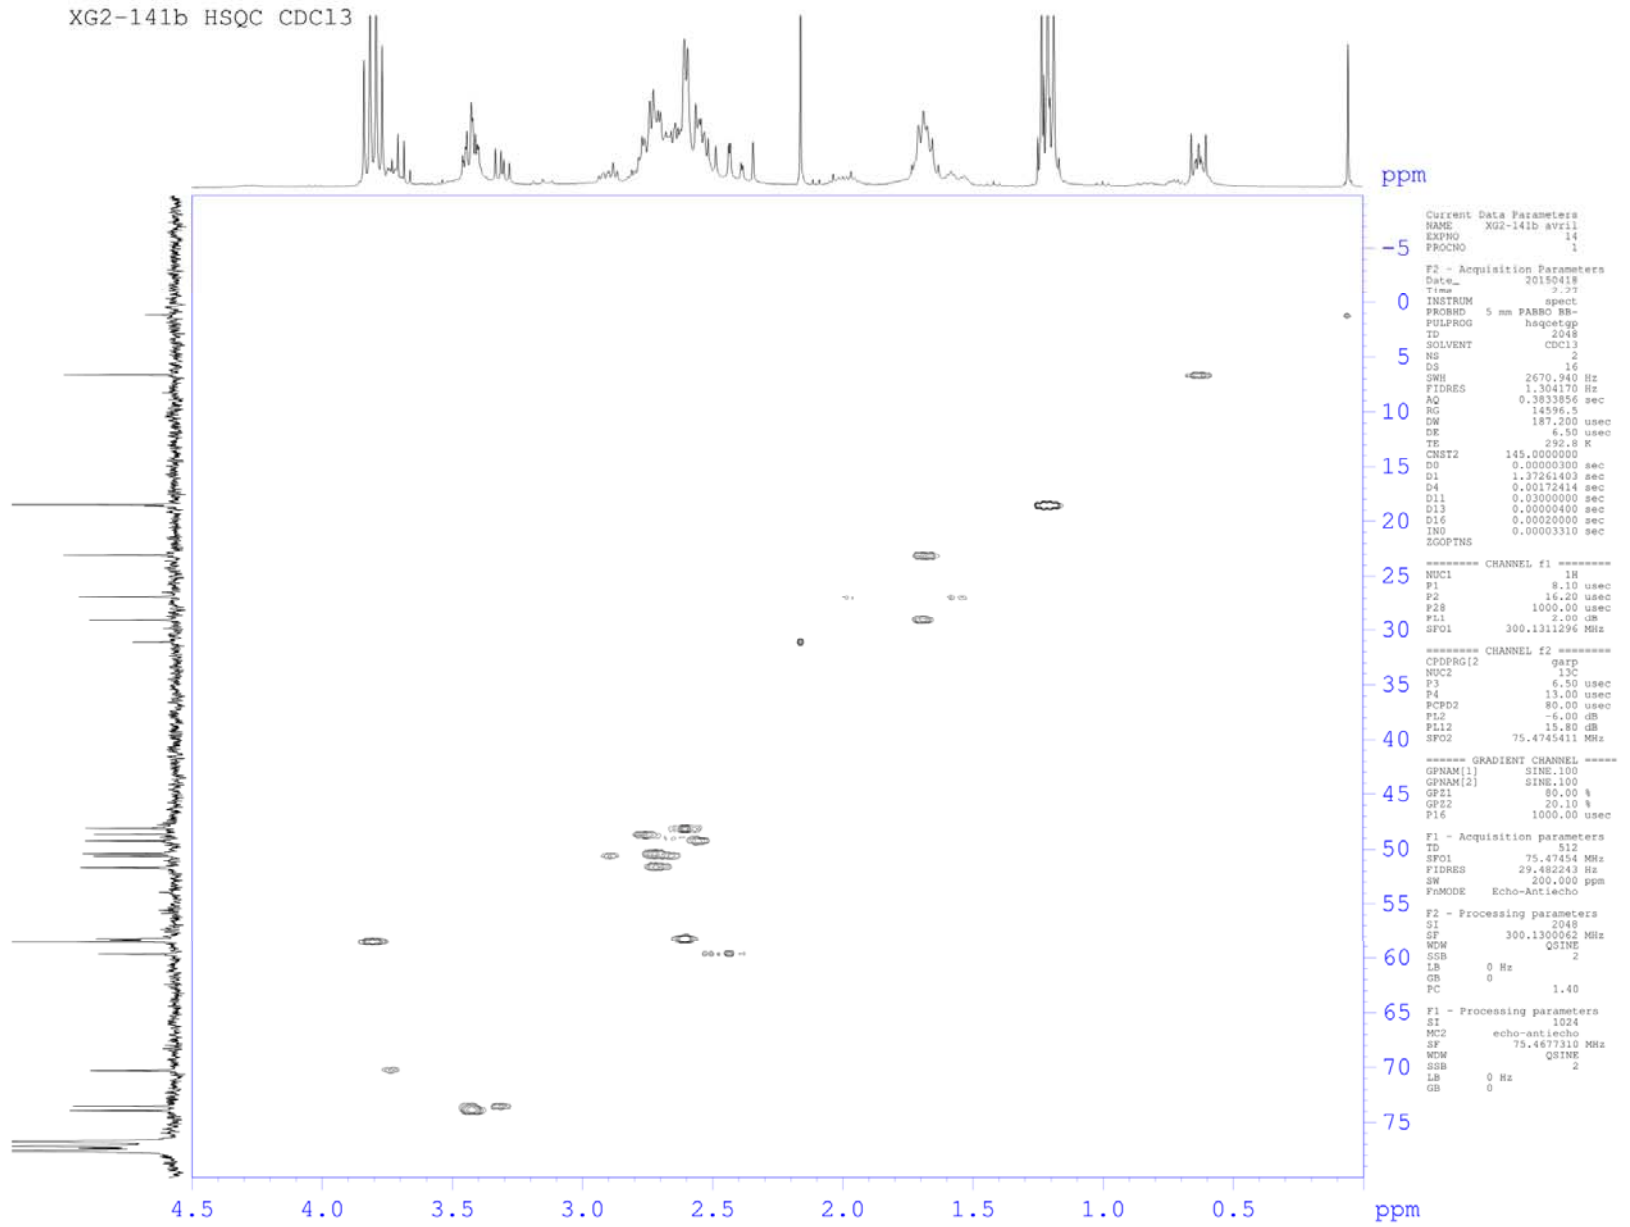

Figure SI\_17: HSQC spectrum of compound 3

# SI\_18

C:\Xcalibur\data\iso310-JLB\vg2141b  
ci nh3

2/18/2015 9:35:45 AM

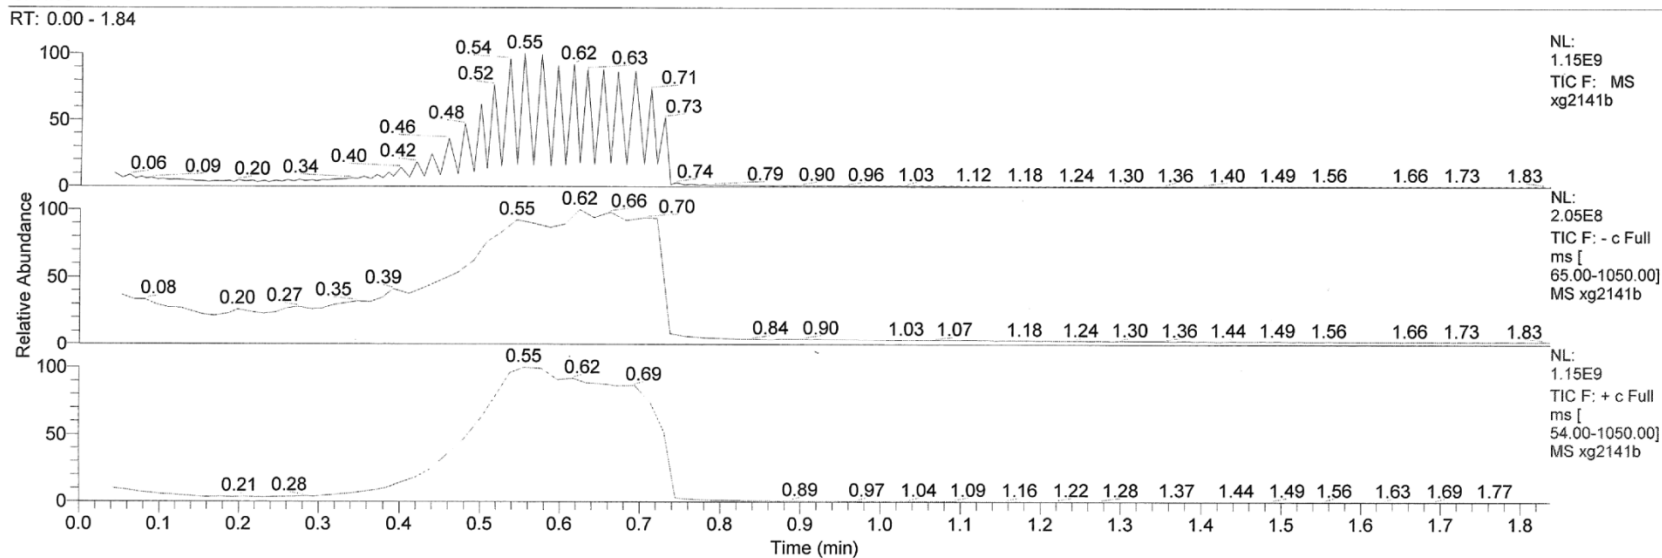

vg2141b #63-80 RT: 0.54-0.69 AV: 9 NL: 5.04E8  
F: + c Full ms [ 54.00-1050.00]

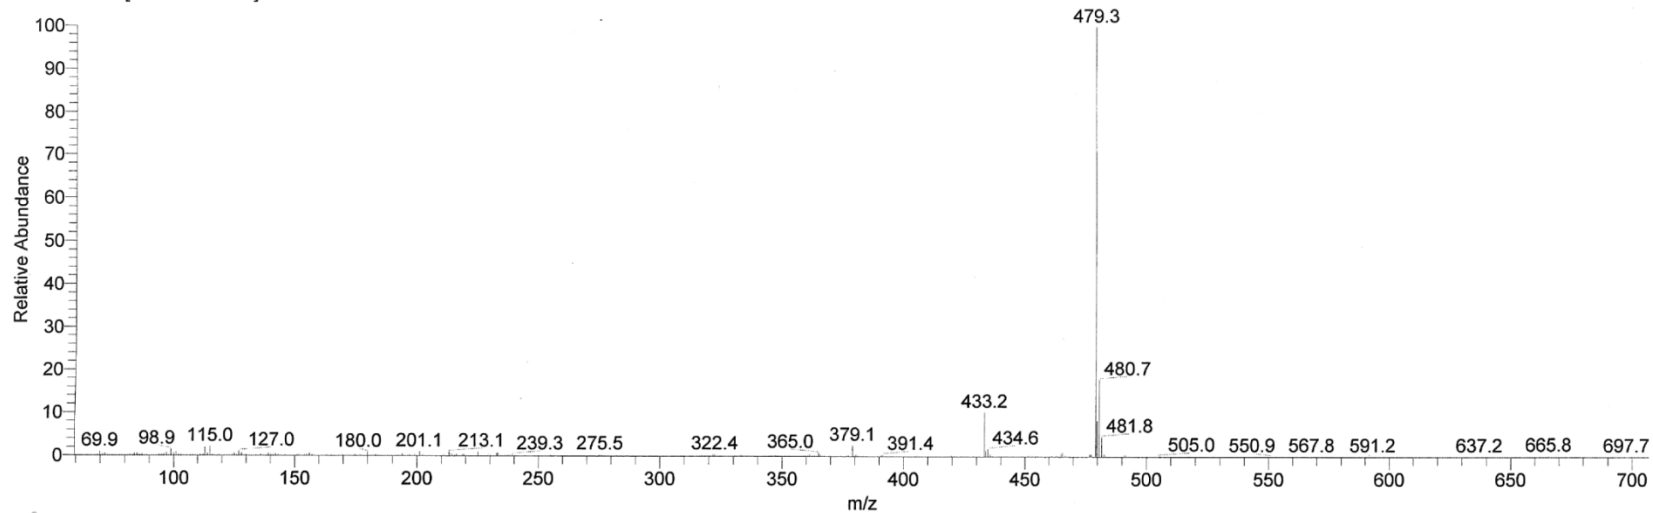

Figure SI\_18: CI-MS spectrum of compound 3

SI\_19

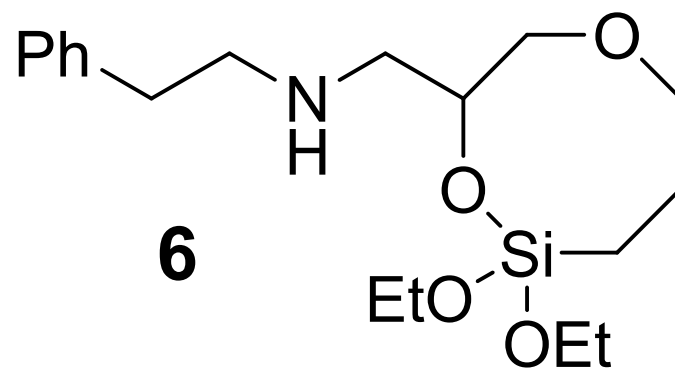

# SI\_20

XG2-149F3 1H CDC13

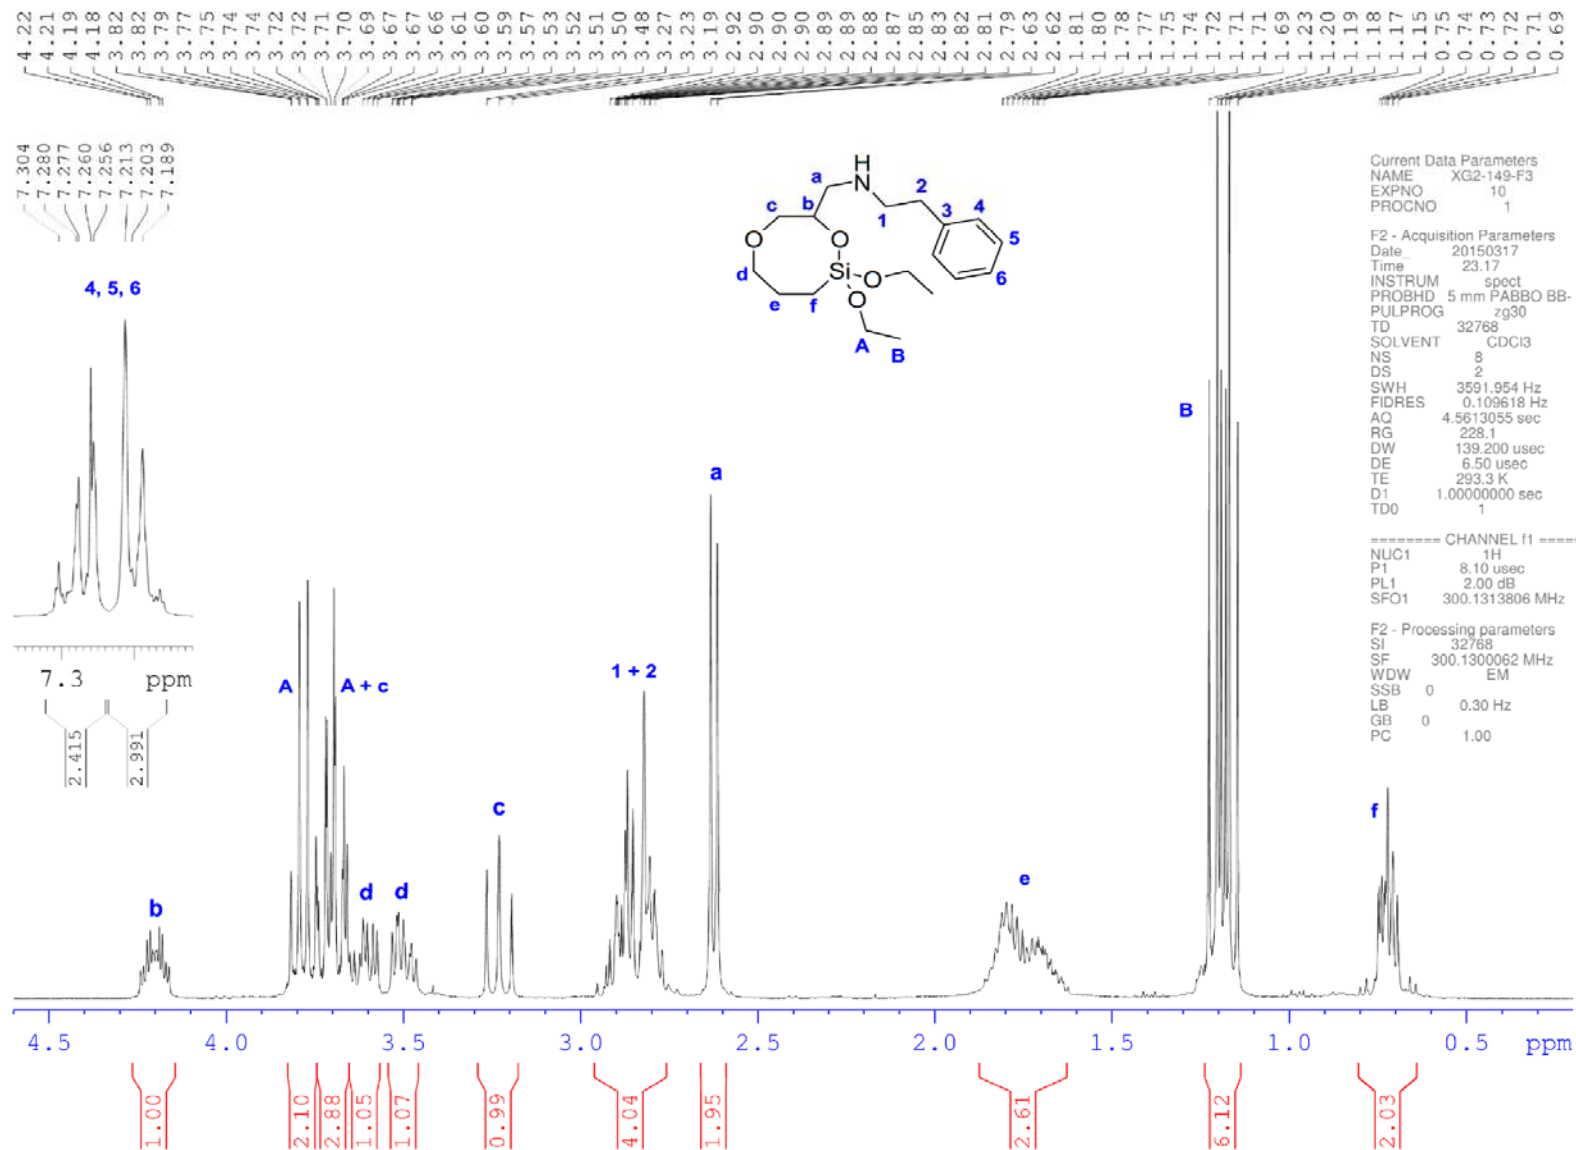

Figure SI\_20: <sup>1</sup>H NMR spectrum of compound 6



# SI\_21

XG2-149F3 13C CDC13

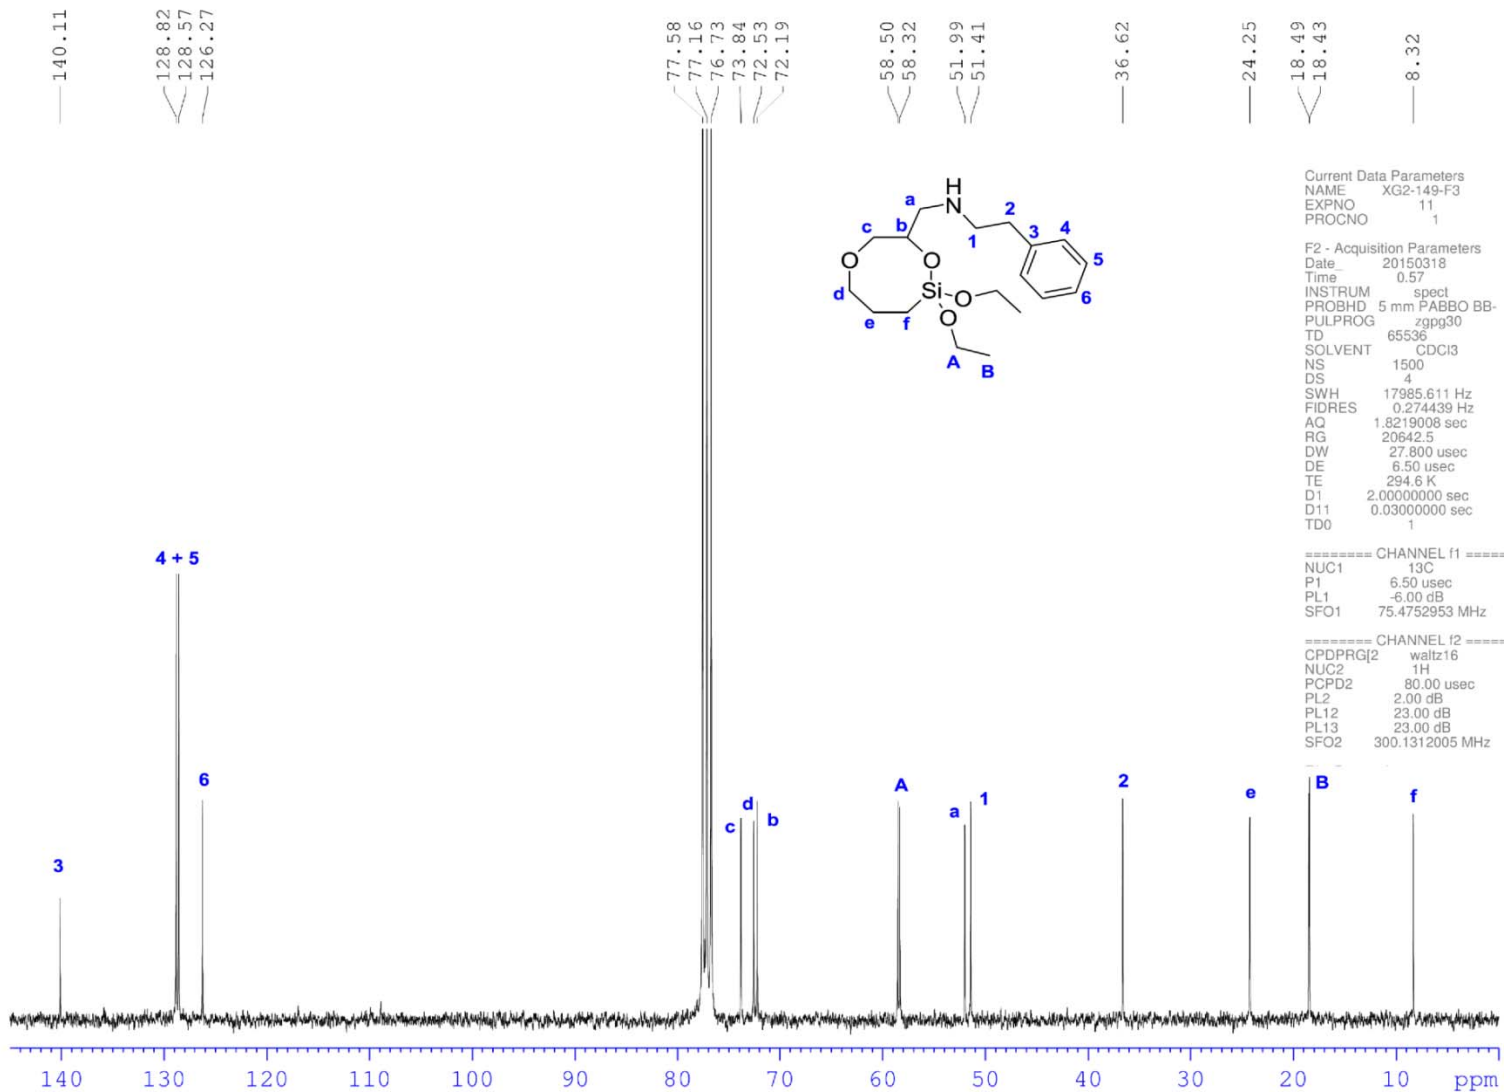

Figure SI\_21: <sup>13</sup>C NMR spectrum of compound 6

# SI\_22

XG2-149F3 DEPT135 CDC13

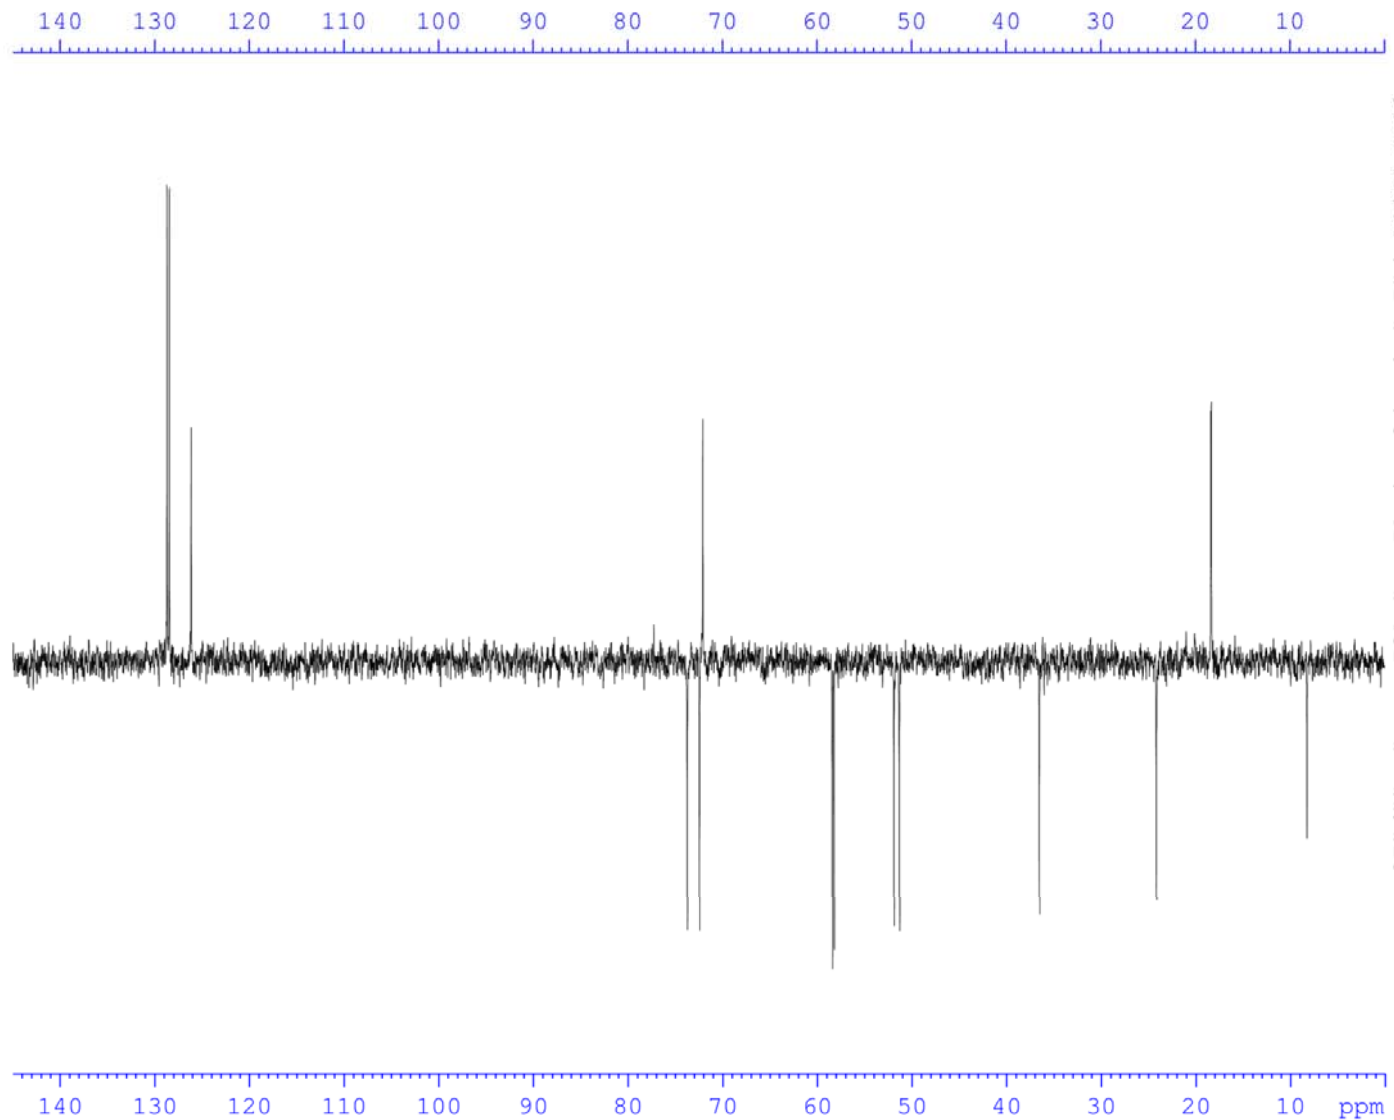

Current Data Parameters  
NAME XG2-149-F3  
EXPNO 12  
PROCNO 1

F2 - Acquisition Parameters  
Date\_ 20150318  
Time 1.15  
INSTRUM spect  
PROBHD 5 mm PABBO BB-  
PULPROG dept135  
TD 65536  
SOLVENT CDC13  
NS 128  
DS 8  
SWH 17985.611 Hz  
FIDRES 0.274439 Hz  
AQ 1.8219008 sec  
RG 18390.4  
DW 27.800 usec  
DE 6.50 usec  
TE 293.8 K  
CNST2 145.0000000  
D1 5.0000000 sec  
D2 0.00344828 sec  
D12 0.00002000 sec  
TD0 1

----- CHANNEL f1 -----  
NUC1 13C  
P1 6.50 usec  
P2 13.00 usec  
PL1 -6.00 dB  
SFO1 75.4752953 MHz

----- CHANNEL f2 -----  
CPDPRG[2] waltz16  
NUC2 1H  
P3 7.50 usec  
P4 15.00 usec  
PCPD2 80.00 usec  
PL2 2.00 dB  
PL12 23.00 dB  
SFO2 300.1312005 MHz

F2 - Processing parameters  
SI 65536  
SF 75.4677490 MHz  
WDW EM  
SSB 0  
LB 2.00 Hz  
GB 0  
PC 1.40

Figure SI\_22: DEPT-135 NMR spectrum of compound 6

# SI\_23

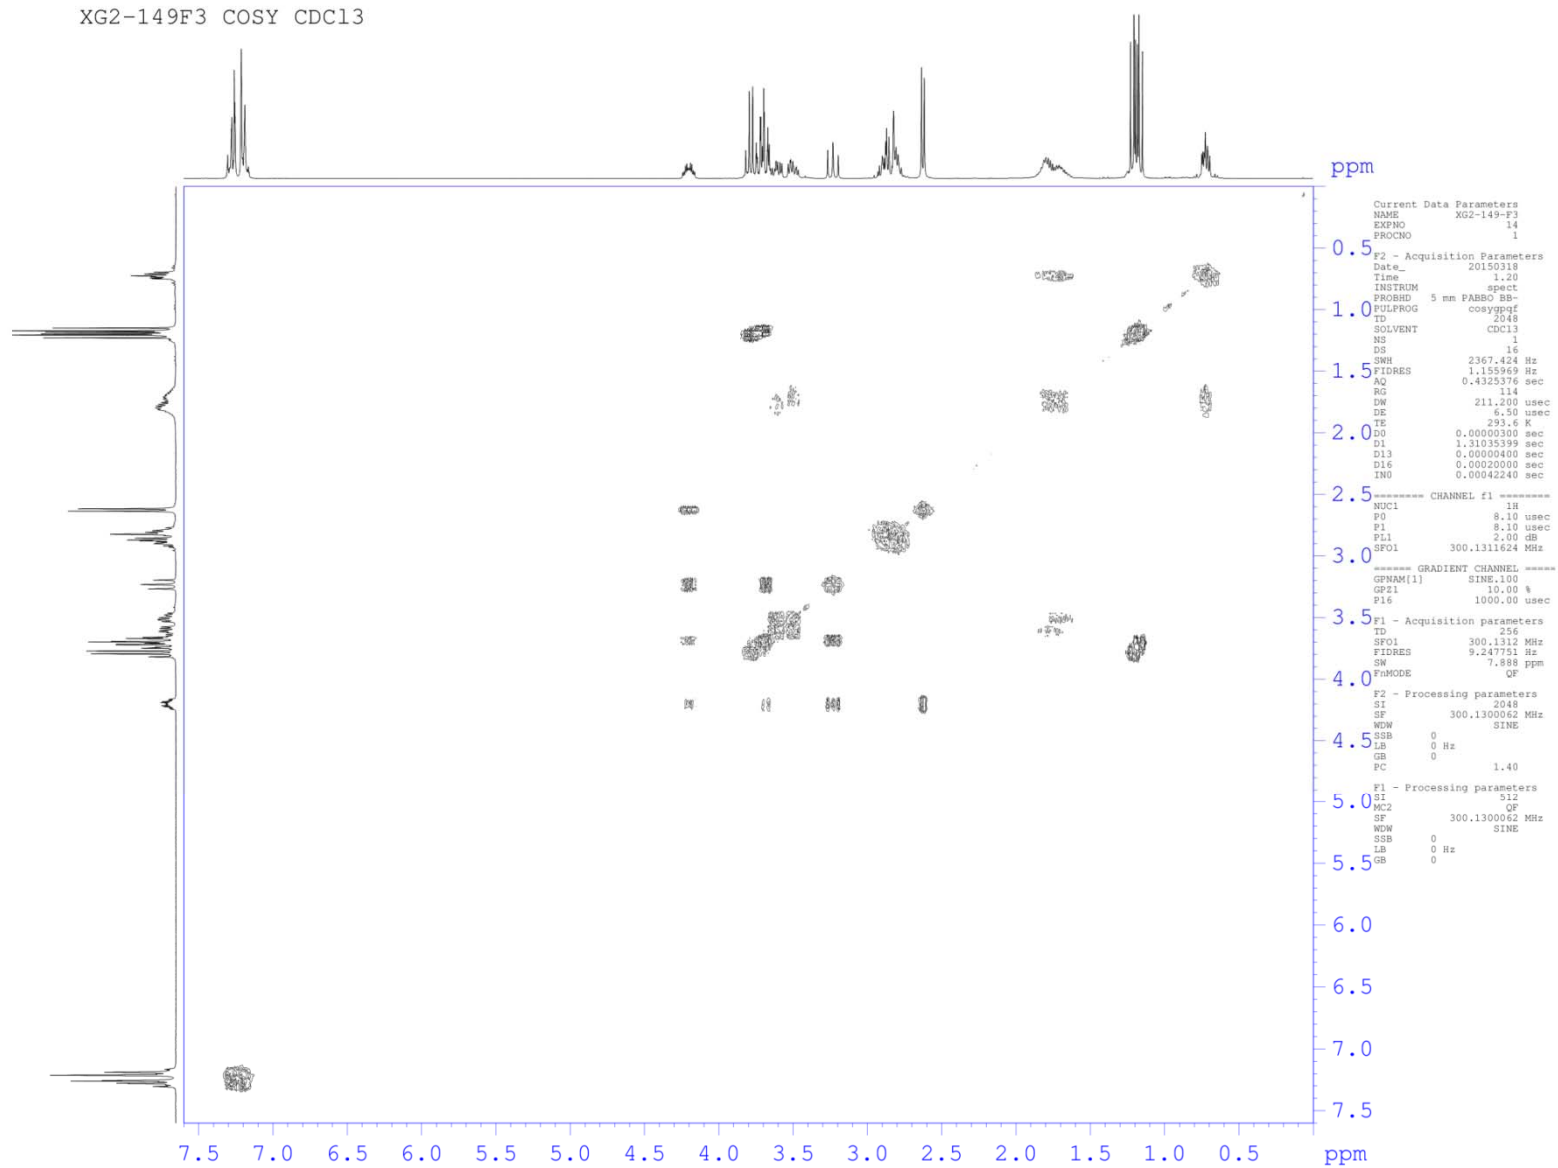

Figure SI\_23:  $^1\text{H}$ - $^1\text{H}$  COSY of compound 6

# SI\_24

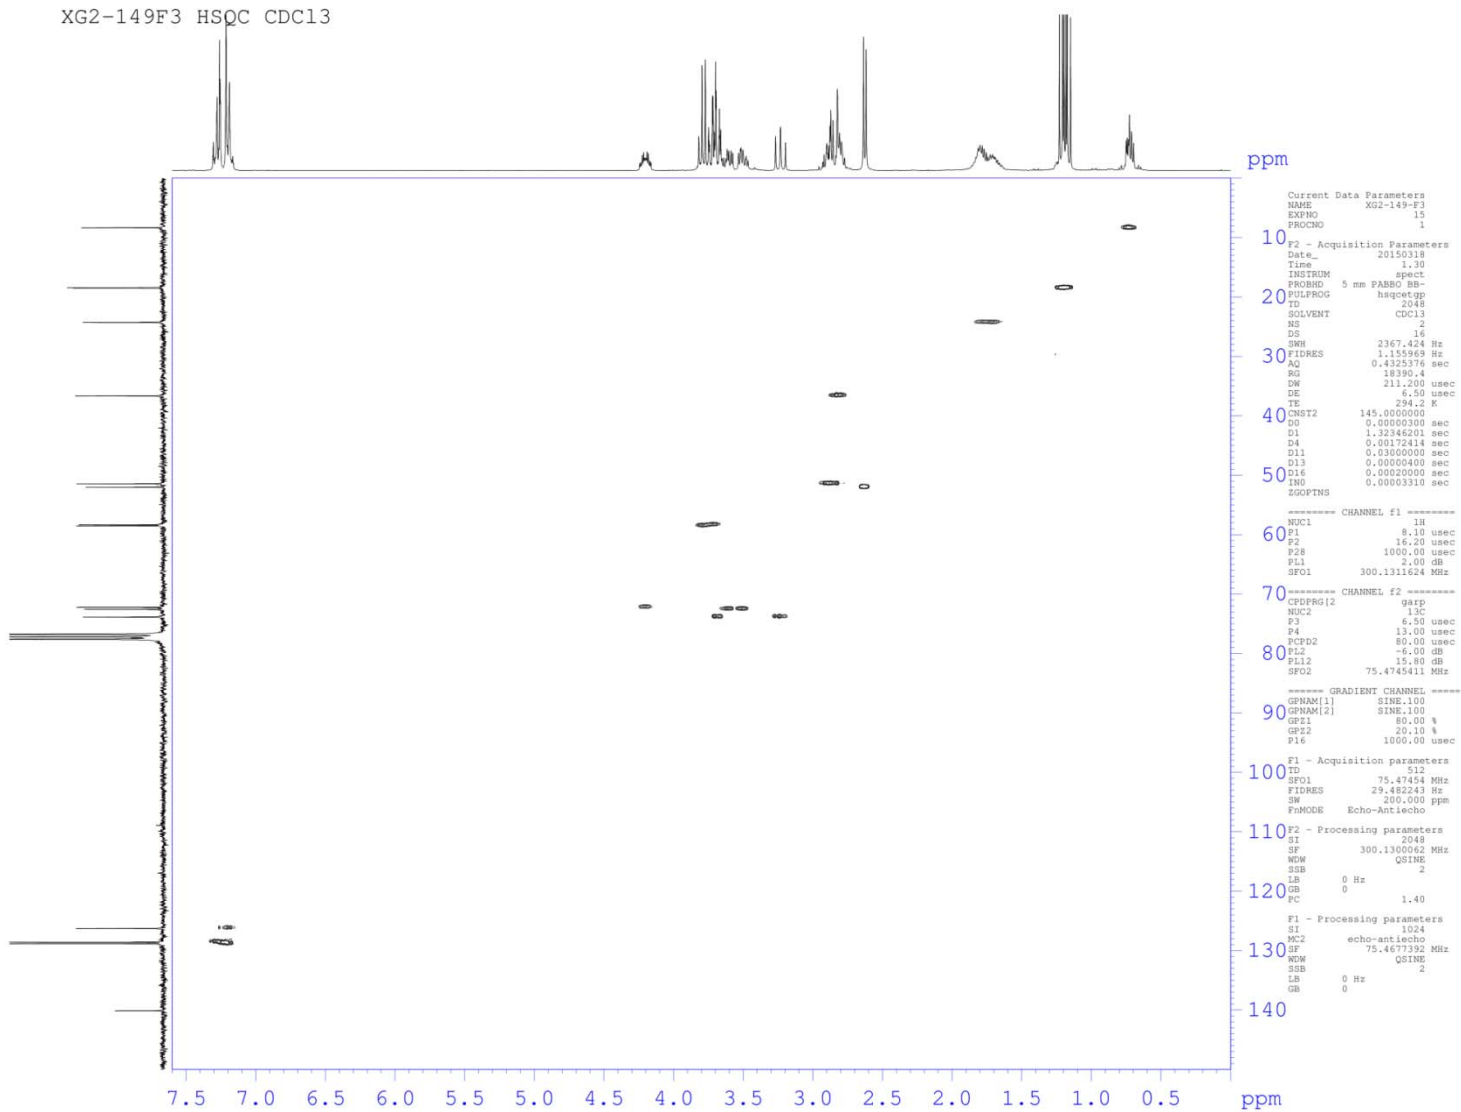

Figure SI\_24: HSQC spectrum of compound 6

# SI\_25

XG2-149F3 HMBC CDC13

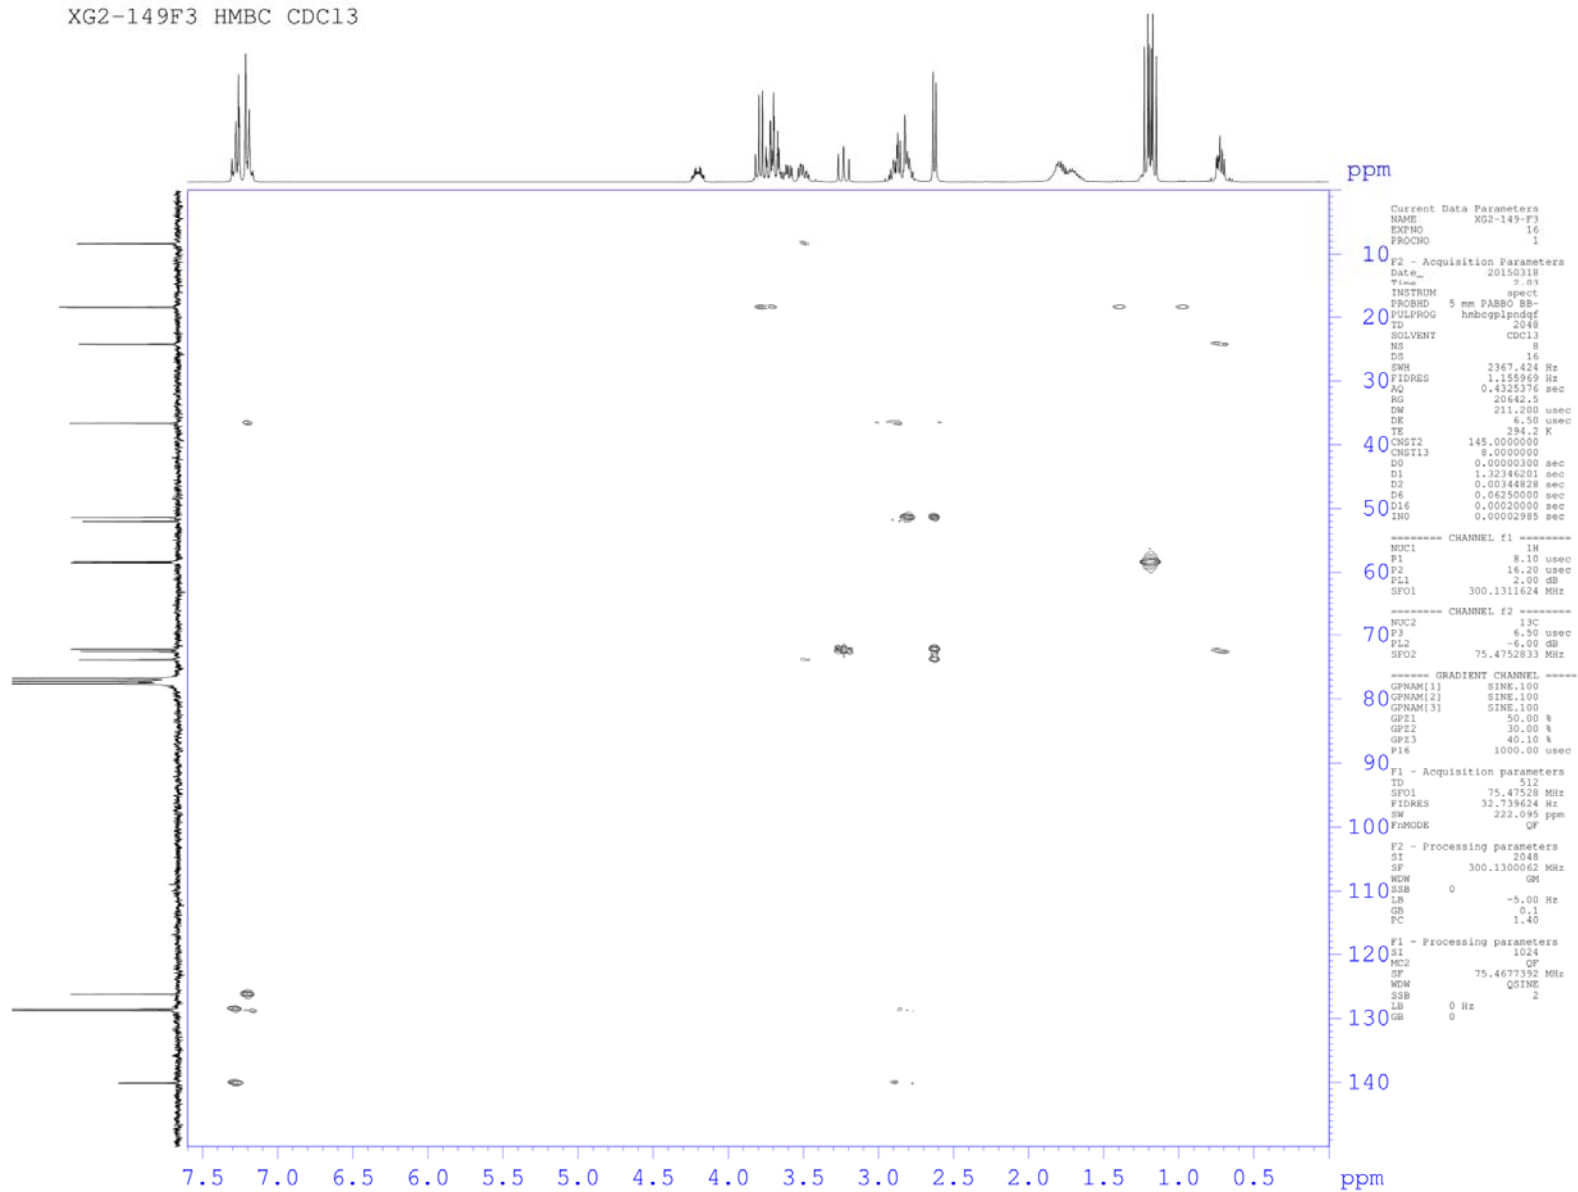

Figure SI\_25: HMBC spectrum of compound 6

XG2-149F3 / CH<sub>2</sub>Cl<sub>2</sub>+MeOH / ESI+

20150428\_XG2-149F3-b 31 (0.636) Cm (22:37)

LCT  
28-Apr-2015  
1: TOF MS ES+  
2.30e4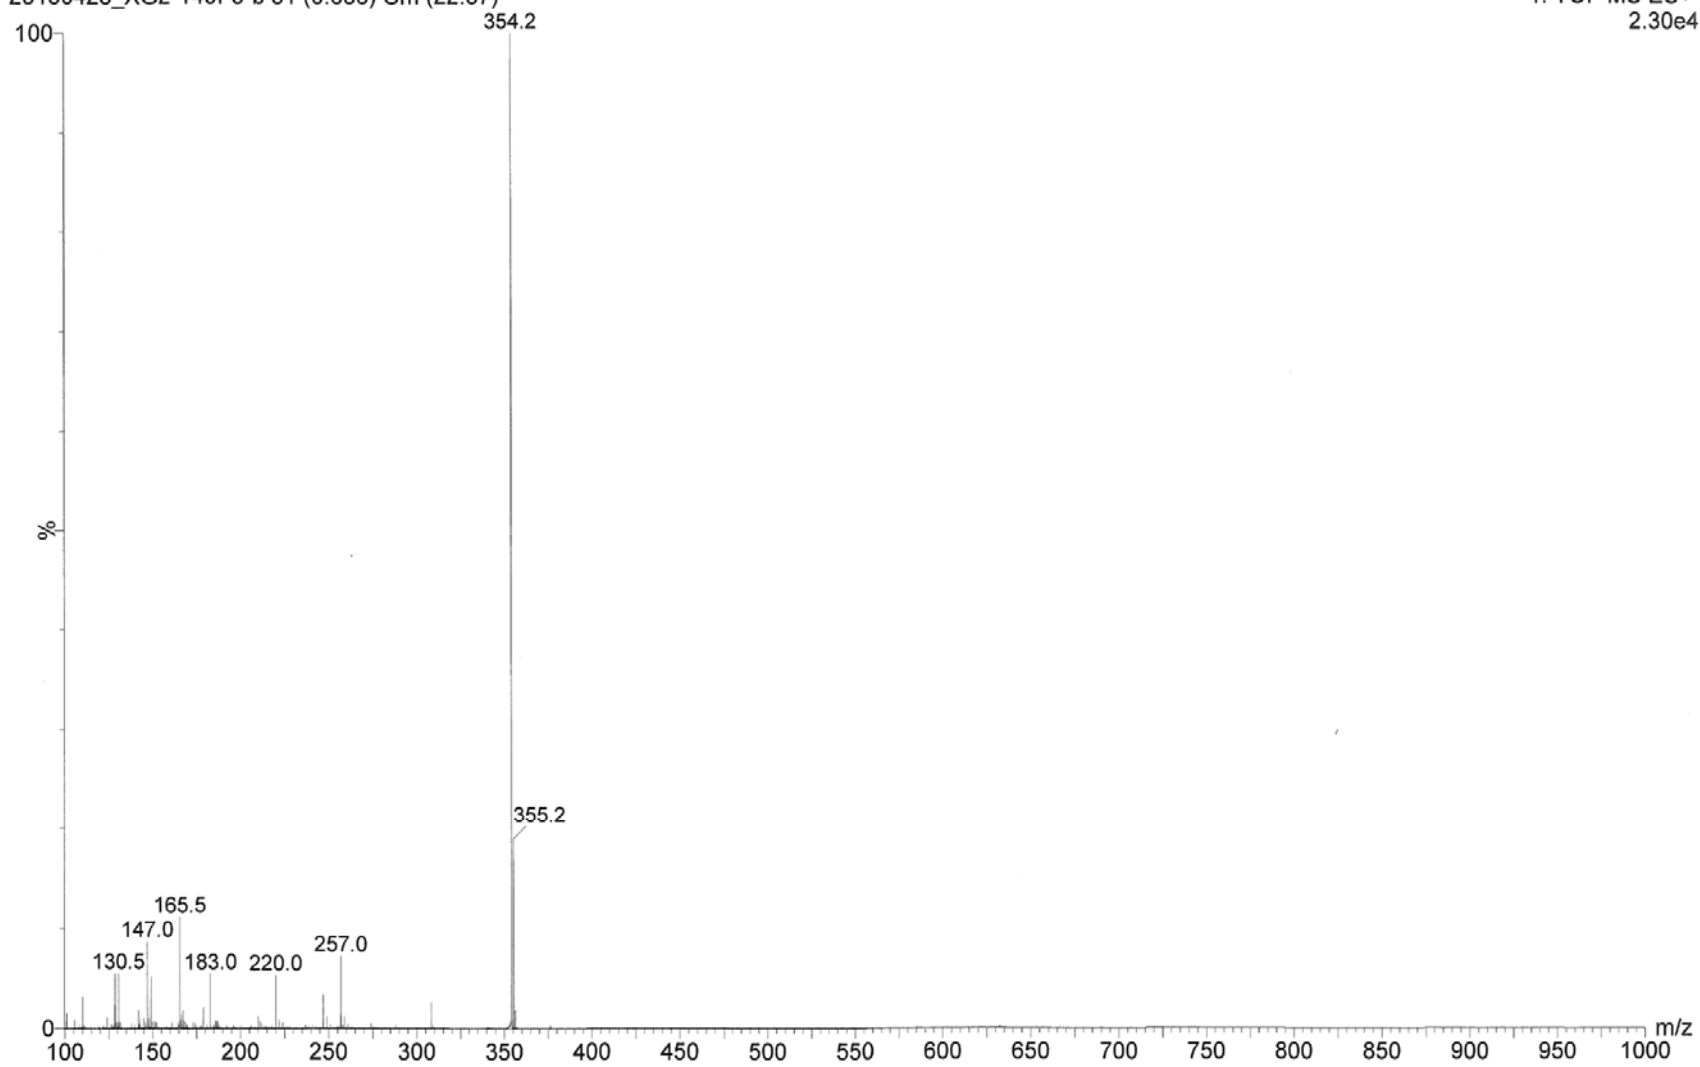

Figure SI\_26: HRMS spectrum of compound 6

## Elemental Composition Report

Page 1

## Single Mass Analysis

Tolerance = 5.0 PPM / DBE: min = -1.5, max = 100.0

Element prediction: Off

Number of isotope peaks used for i-FIT = 4

Monoisotopic Mass, Even Electron Ions

179 formula(e) evaluated with 1 results within limits (up to 50 closest results for each mass)

Elements Used:

C: 0-100 H: 0-100 N: 0-6 O: 0-5 Si: 1-1

LCT

XG2-149F3 / CH2Cl2+MeOH / ESI+

1: TOF MS ES+

20150428\_XG2-149F3 14 (0.285) AM (Cen,13, 80.00, Ar,4100.0,556.28,0.00,LS 10); Cm (6:15)  
28-Apr-2015

2.79e+004

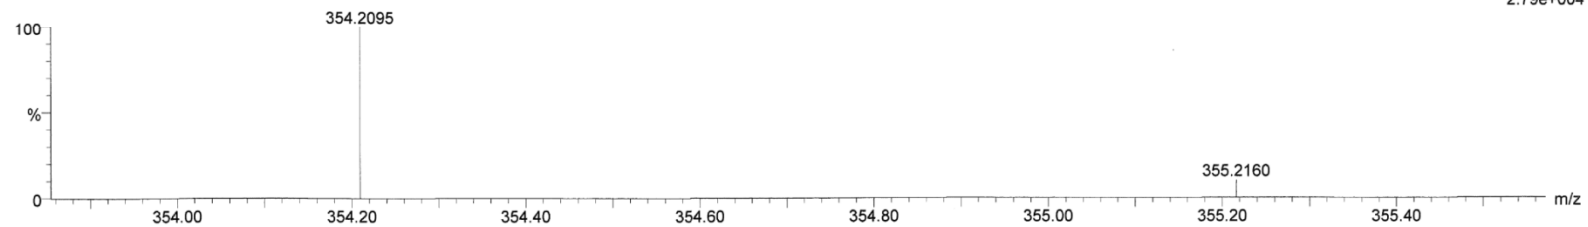

Minimum: -1.5  
Maximum: 5.0 5.0 100.0

| Mass     | Calc. Mass | mDa  | PPM  | DBE | i-FIT | Formula         |
|----------|------------|------|------|-----|-------|-----------------|
| 354.2095 | 354.2101   | -0.6 | -1.7 | 4.5 | n/a   | C18 H32 N O4 Si |

Figure SI\_27: HRMS spectrum of compound 6

SI\_28

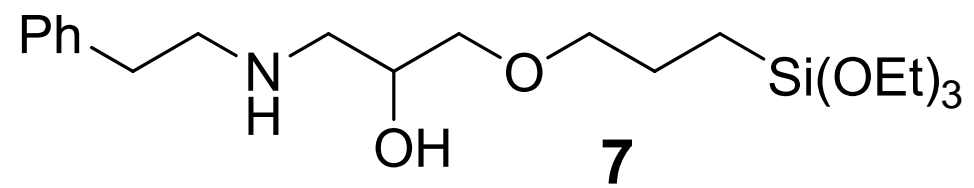



# SI\_29

XG2-149F4 1H CDCl3

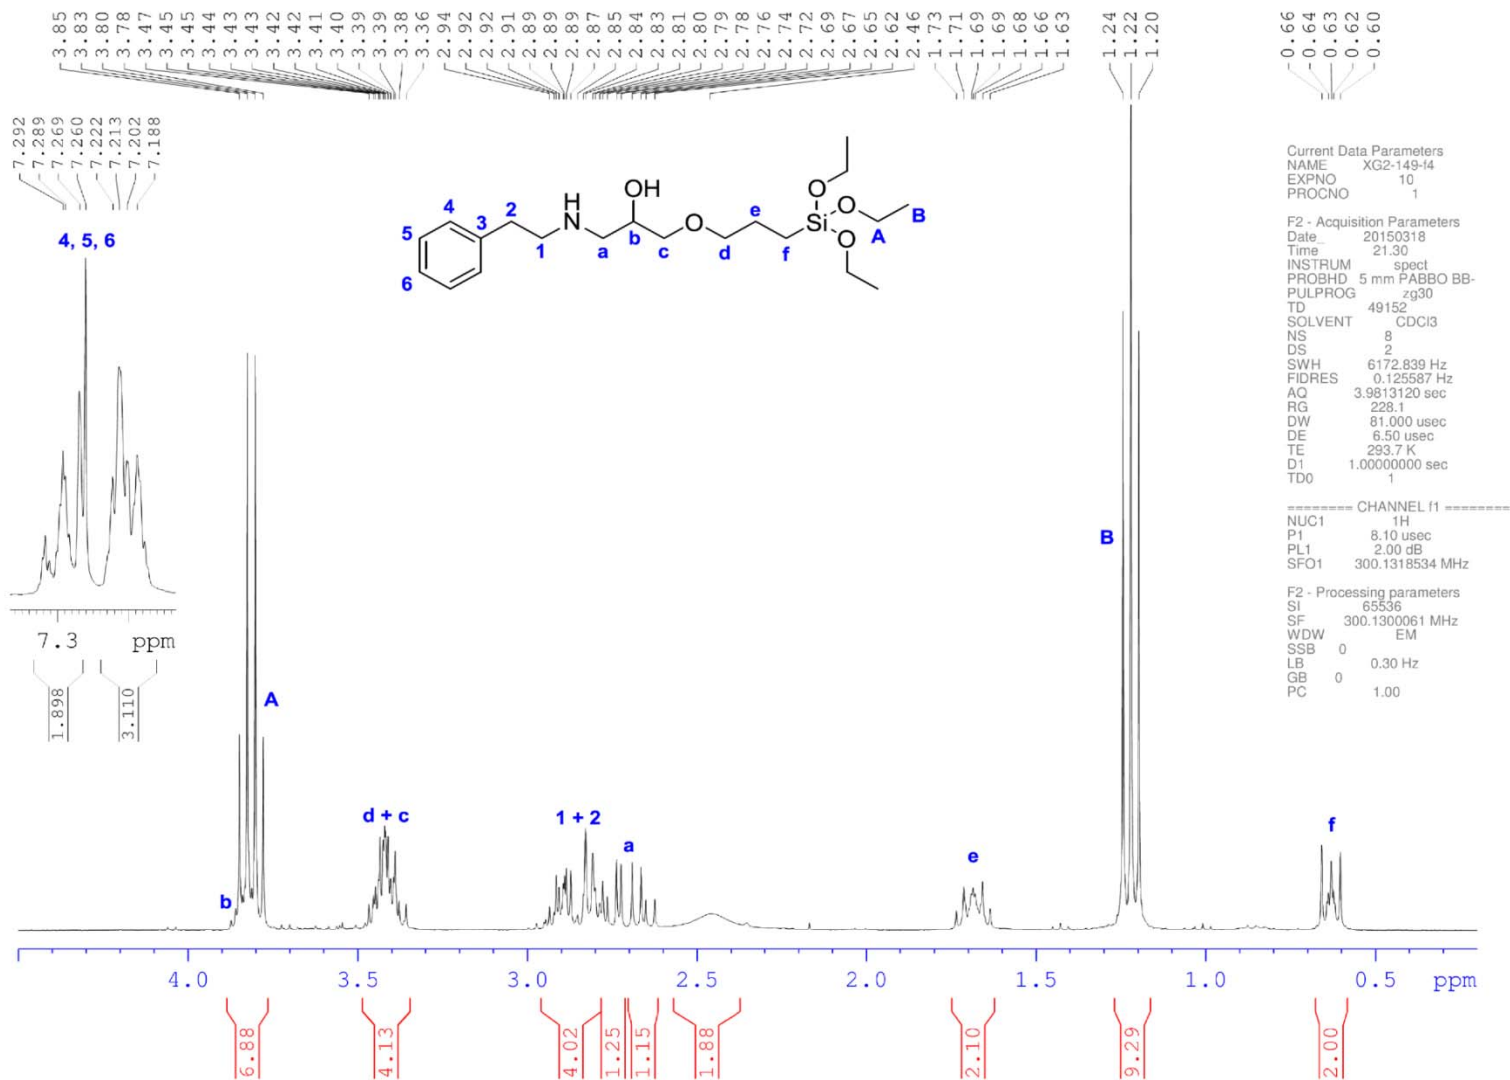

Figure SI\_29: <sup>1</sup>H NMR spectrum of compound 7

# SI\_30

XG2-149F4 13C CDC13

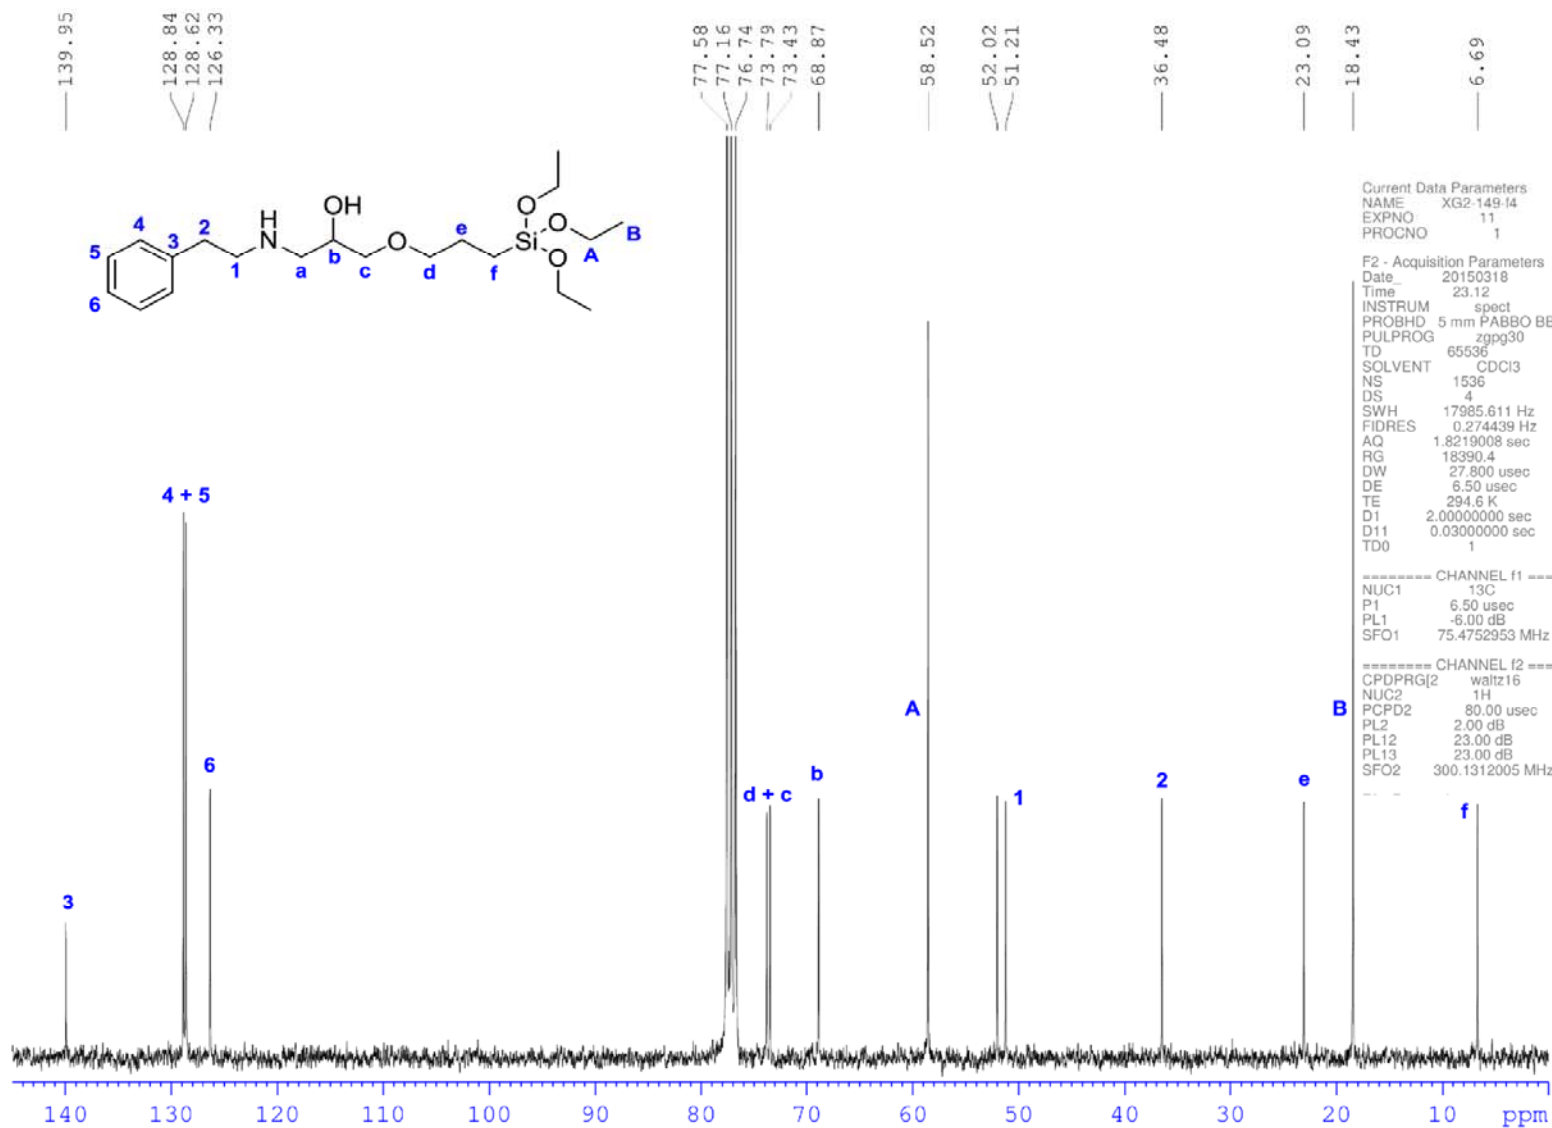

Figure SI\_30: <sup>13</sup>C NMR spectrum of compound 7

# SI\_31

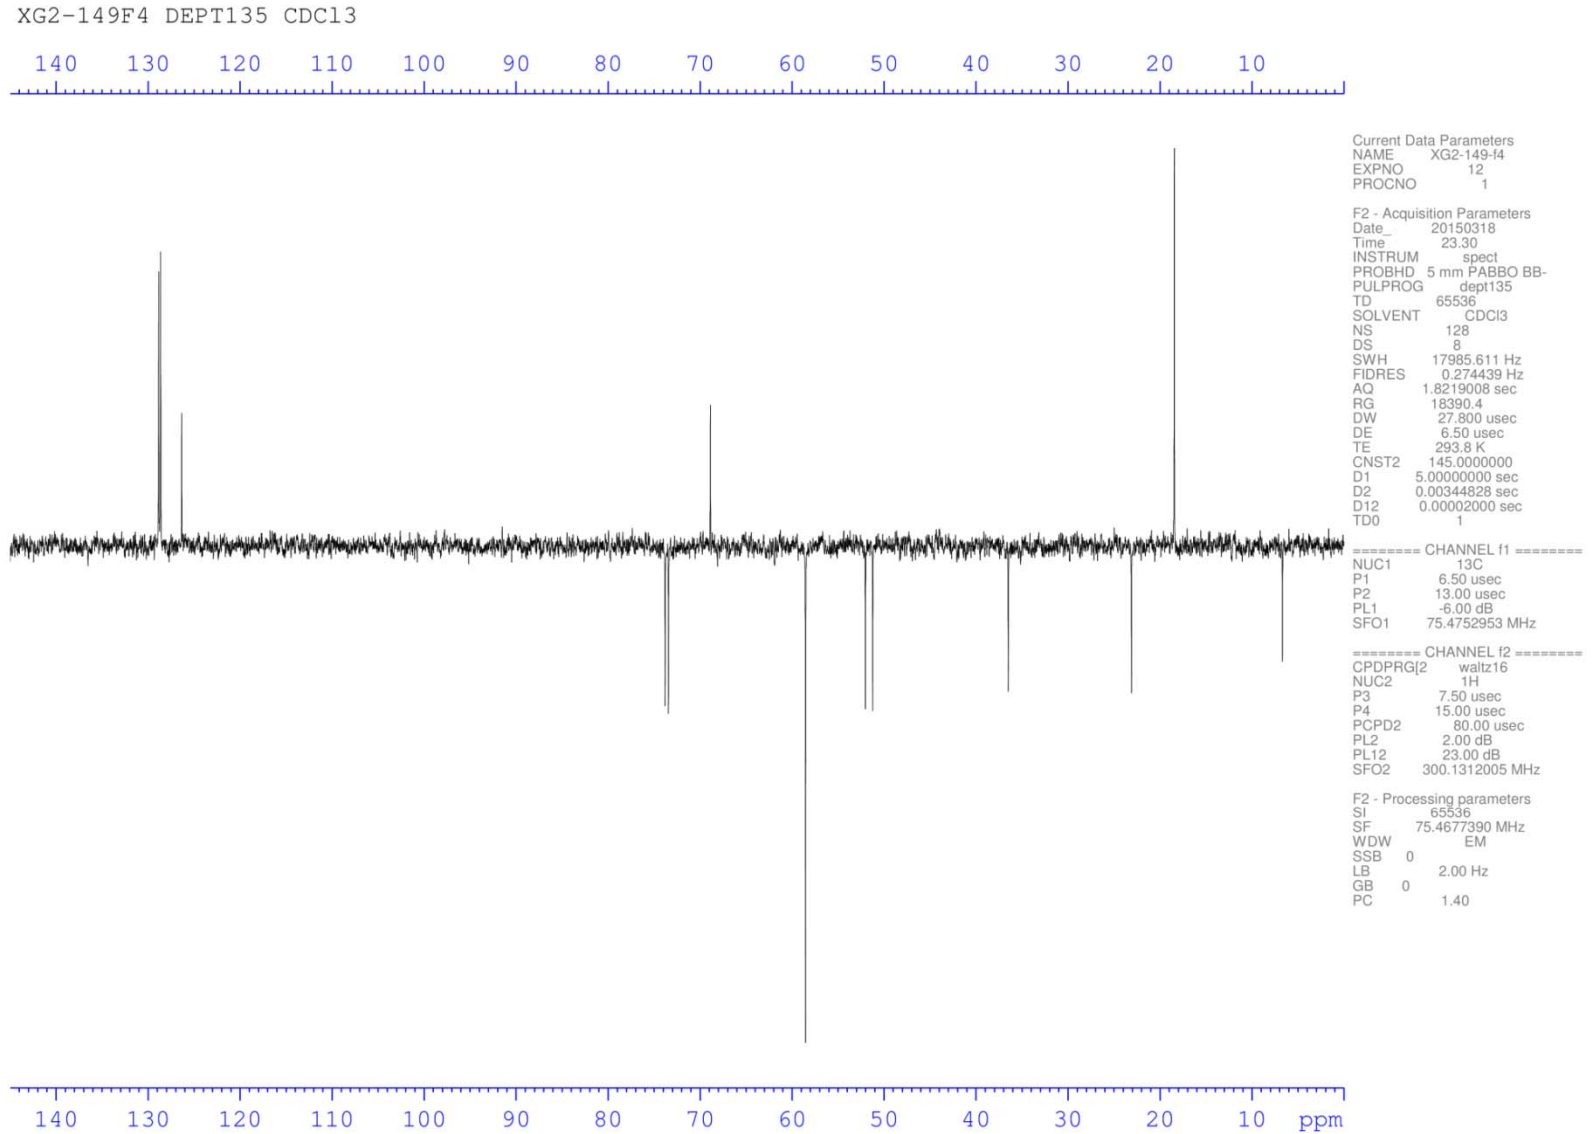

Figure SI\_31: DEPT 135 spectrum of compound 7

# SI\_32

XG2-149F4 COSY CDC13

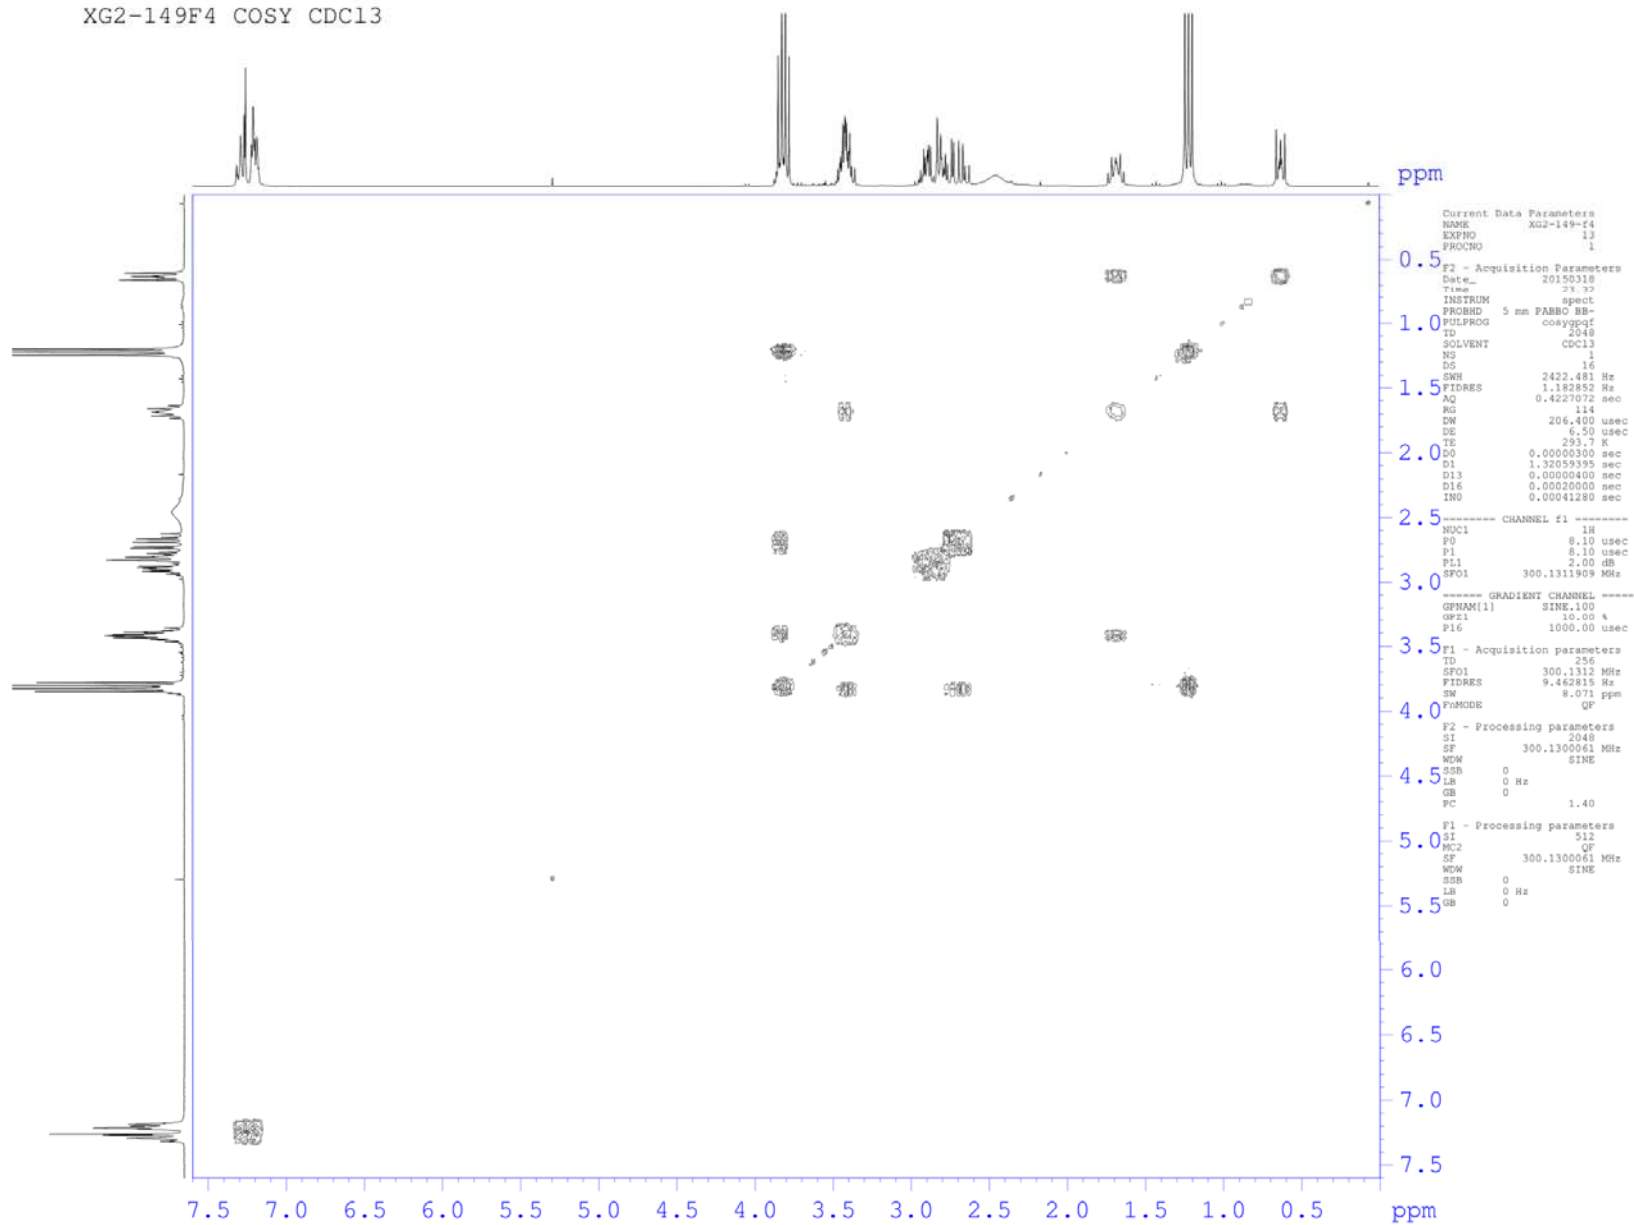

Figure SI\_32:  $^1\text{H}$   $^1\text{H}$  COSY spectrum of compound 7

# SI\_33

XG2-149F4 HSQC CDC13

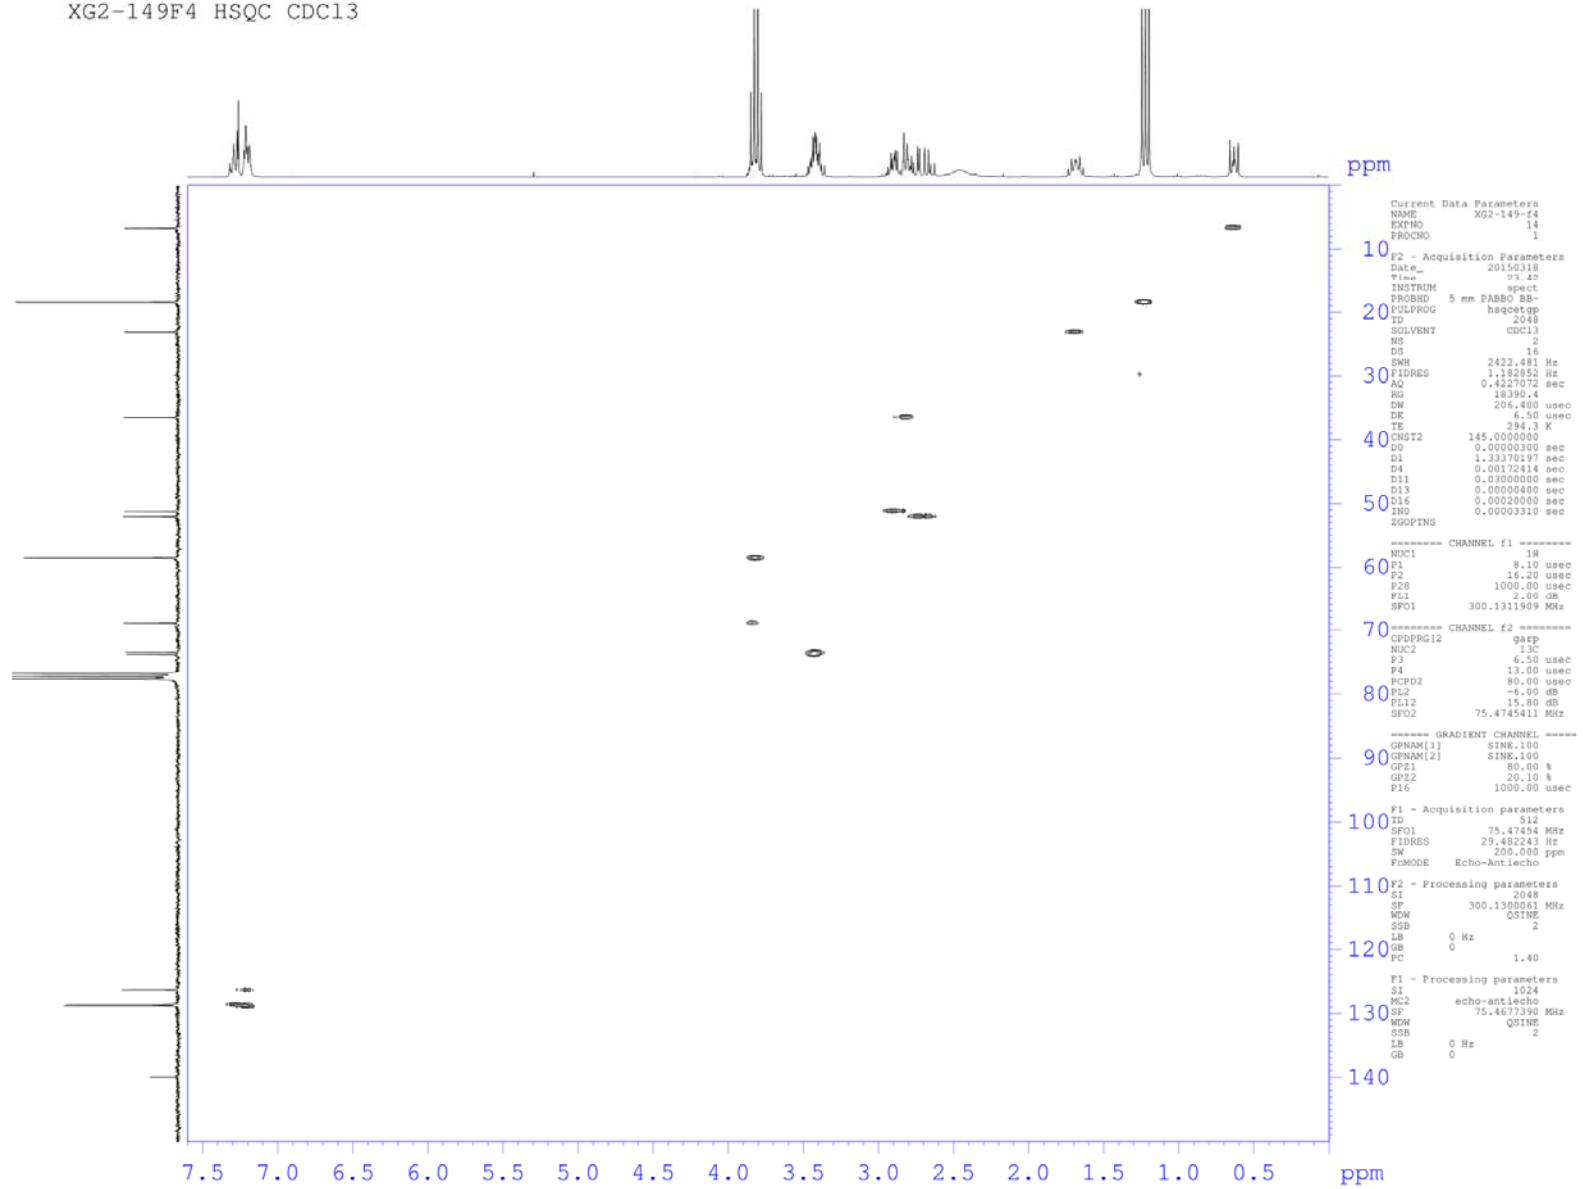

Figure SI\_33: HSQC spectrum of compound 7

# SI\_34

XG2-149F4 HMBC CDC13

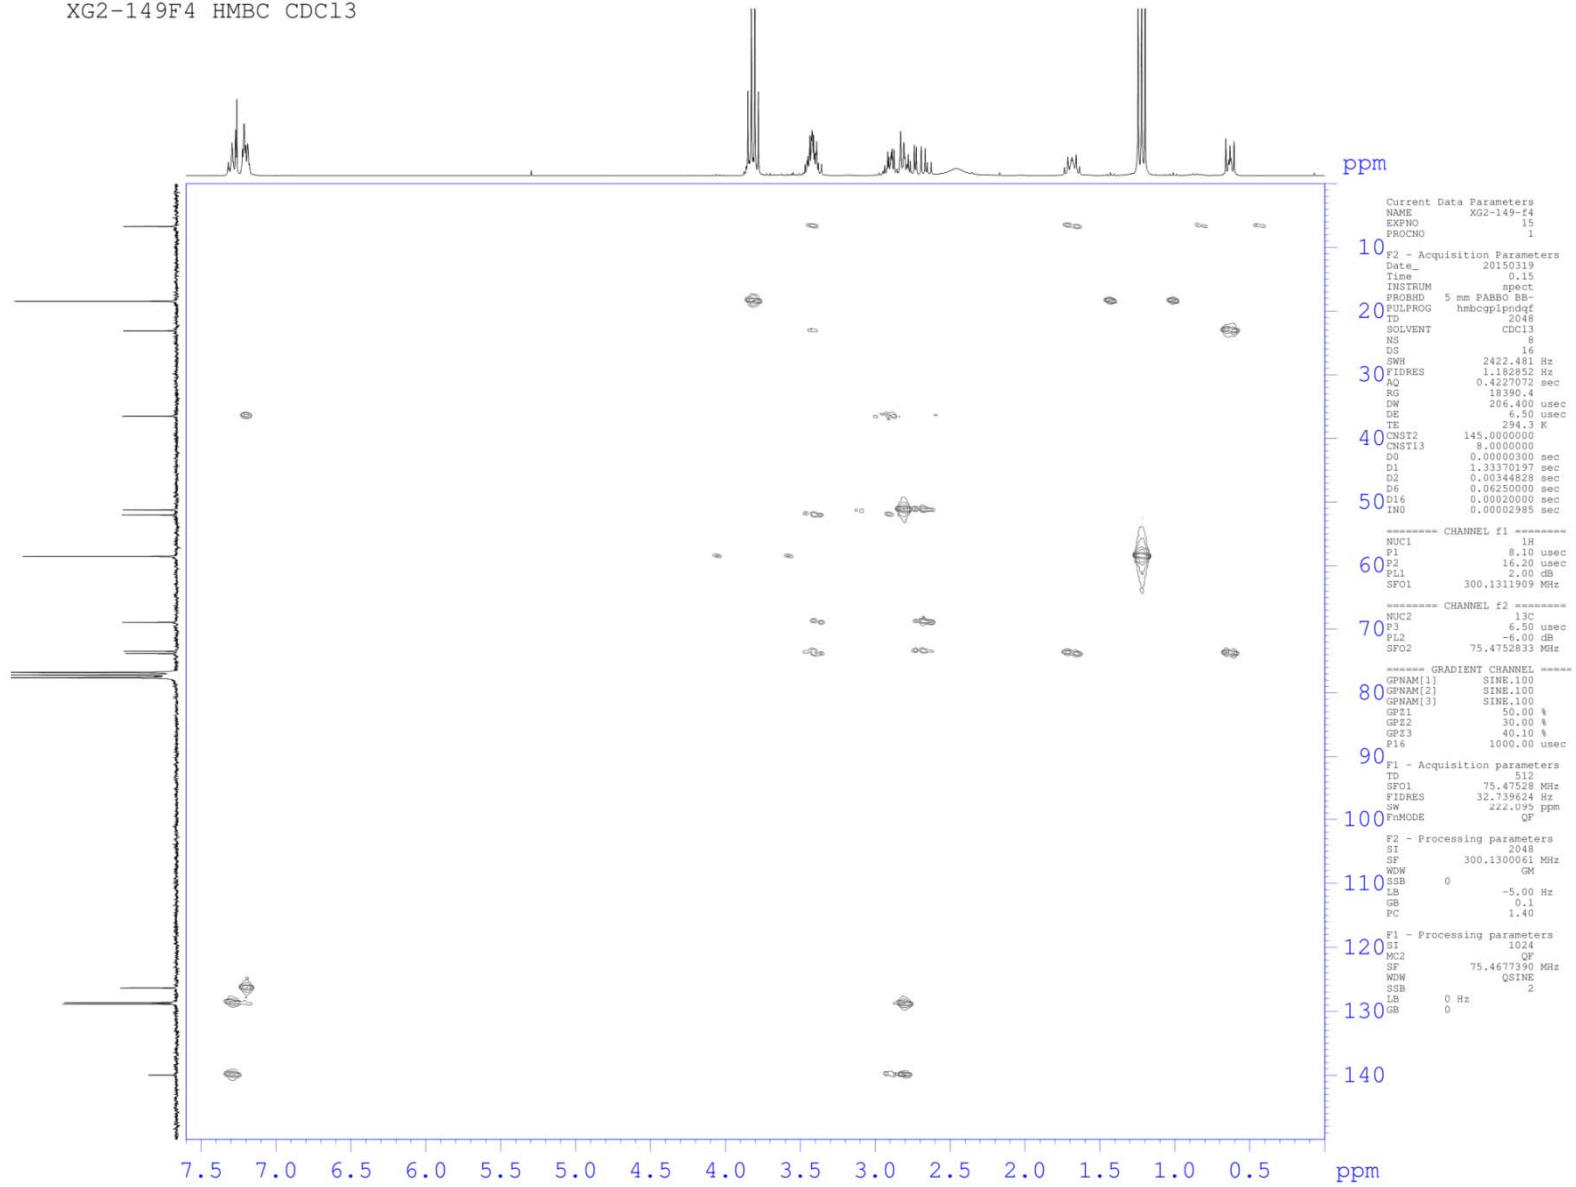

Figure SI\_34: HMBC spectrum of compound 7

XG2-149F4 / CH<sub>2</sub>Cl<sub>2</sub>+MeOH / ESI+  
20150428\_XG2-149F4-b 6 (0.135) Cm (6:29)

LCT  
28-Apr-2015  
1: TOF MS ES+  
4.54e3

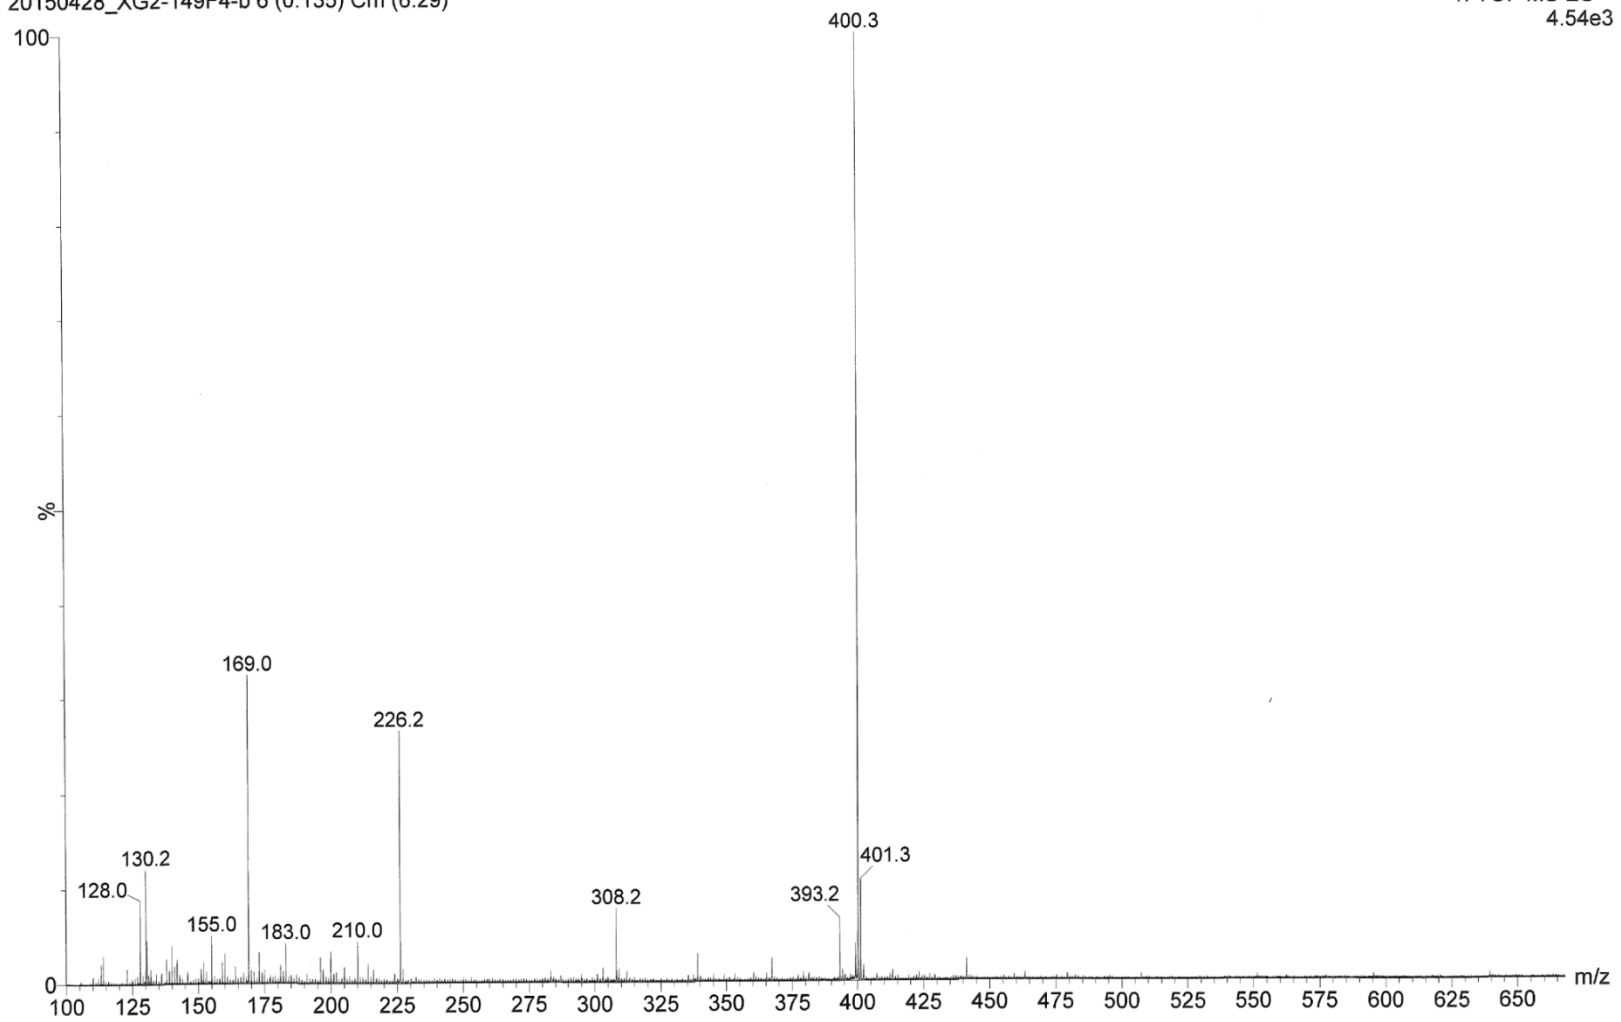

Figure SI\_35: ESI-MS spectrum of compound 7

## Elemental Composition Report

## Single Mass Analysis

Tolerance = 5.0 PPM / DBE: min = -1.5, max = 100.0

Element prediction: Off

Number of isotope peaks used for i-FIT = 4

Monoisotopic Mass, Even Electron Ions

202 formula(e) evaluated with 1 results within limits (up to 50 closest results for each mass)

Elements Used:

C: 0-100 H: 0-100 N: 0-6 O: 0-5 Si: 1-1

LCT

XG2-149F4 / CH2Cl2+MeOH / ESI+

1: TOF MS ES+

20150428\_XG2-149F4 25 (0.502) AM (Cen,13, 80.00, Ar,4100.0,556.28,0.00,LS 10); Cm (9:30)  
28-Apr-2015

2.65e+004

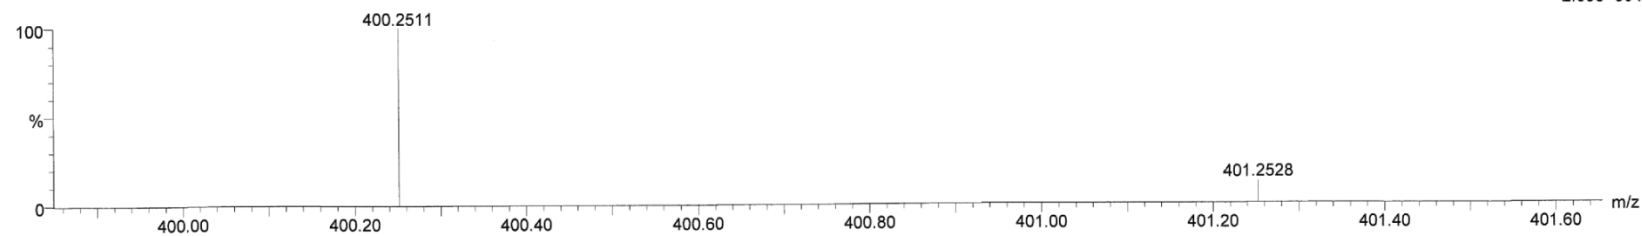

Minimum:

Maximum: 5.0 5.0 -1.5

100.0

| Mass     | Calc. Mass | mDa  | PPM  | DBE | i-FIT | Formula         |
|----------|------------|------|------|-----|-------|-----------------|
| 400.2511 | 400.2519   | -0.8 | -2.0 | 3.5 | n/a   | C20 H38 N O5 Si |

Figure SI\_36: HRMS spectrum of compound 7



SI\_37

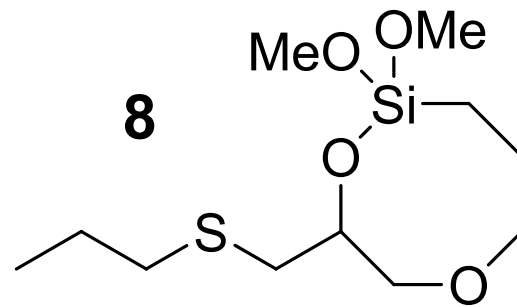

# SI\_38

XG2-143F1 1H CDC13

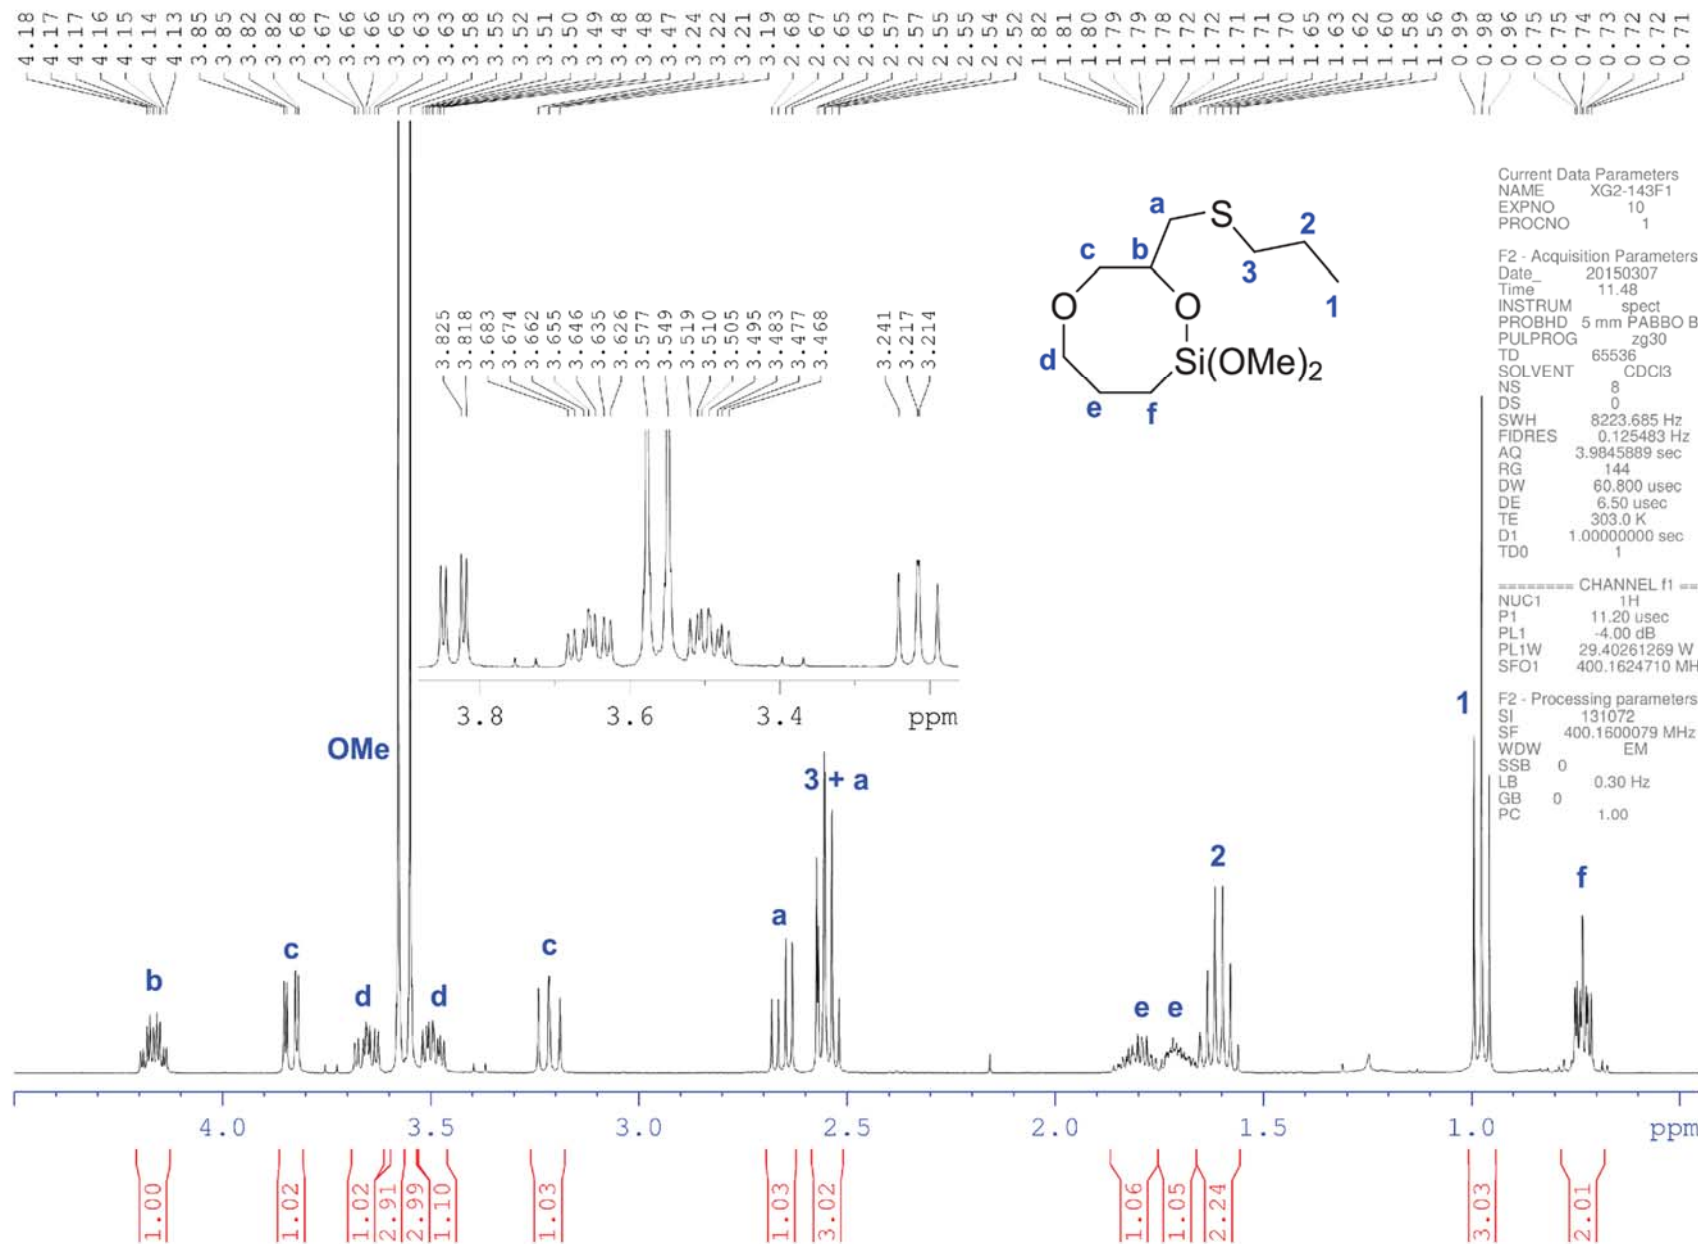

Figure SI\_38: <sup>1</sup>H NMR spectrum of compound 8

# SI\_39

XG2-143F1 13C CDC13

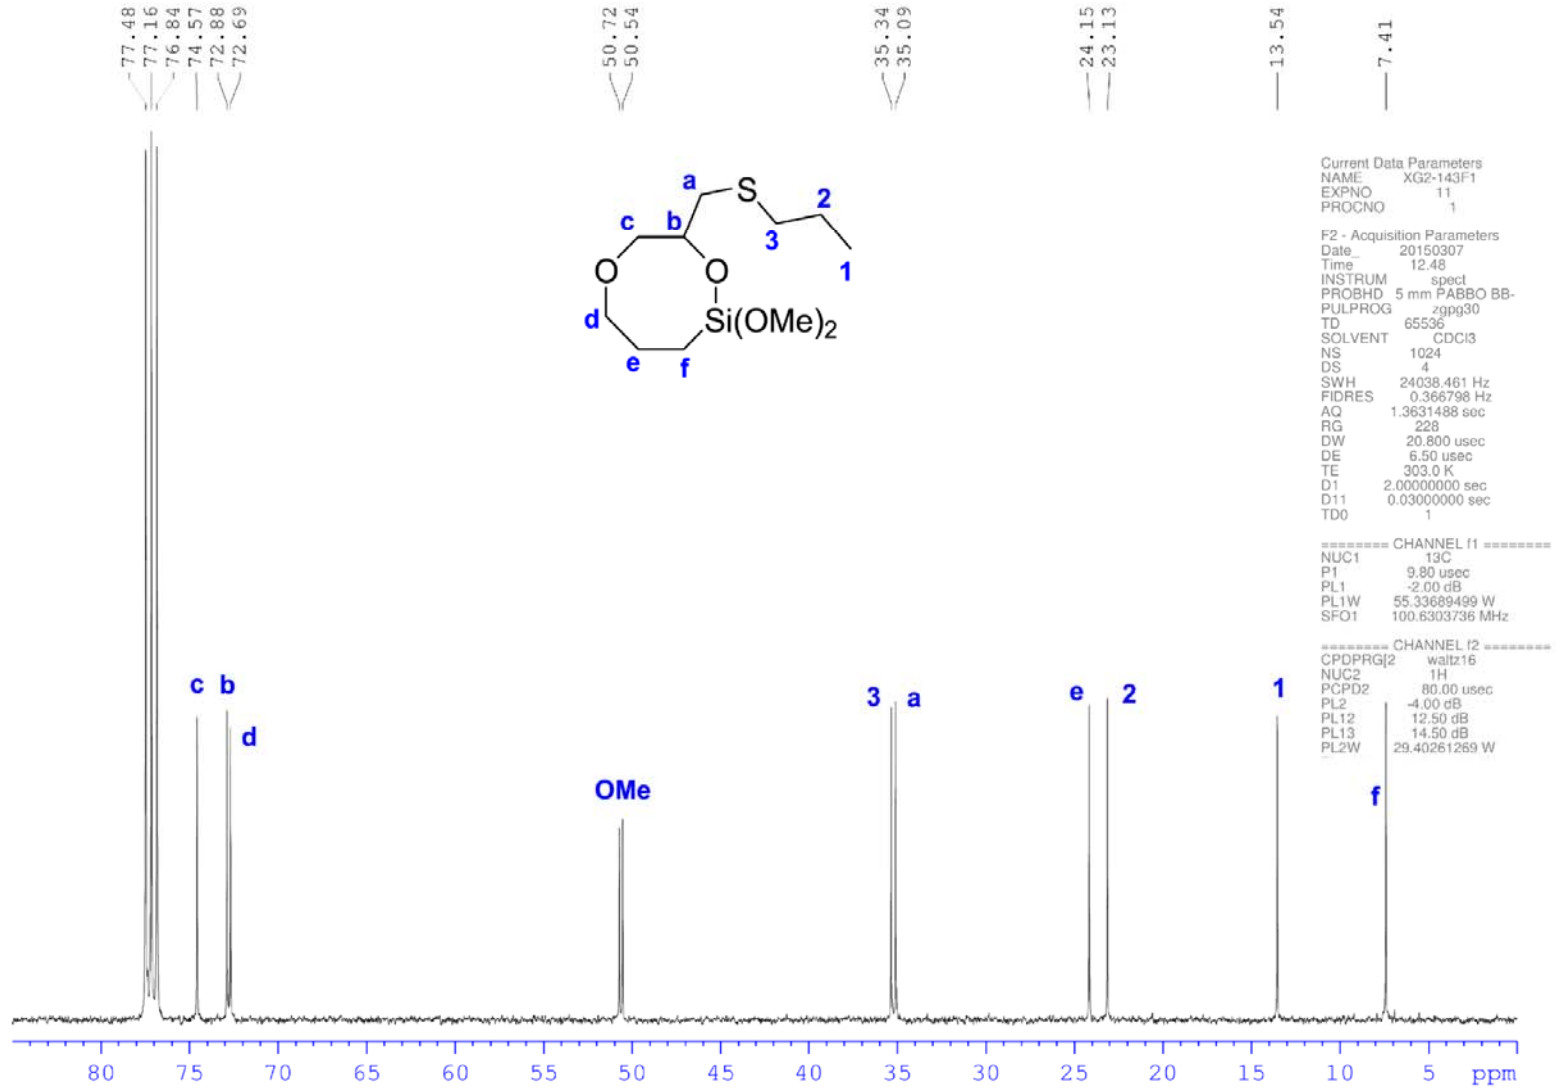

Figure SI\_39: <sup>13</sup>C NMR spectrum of compound 8

# SI\_40

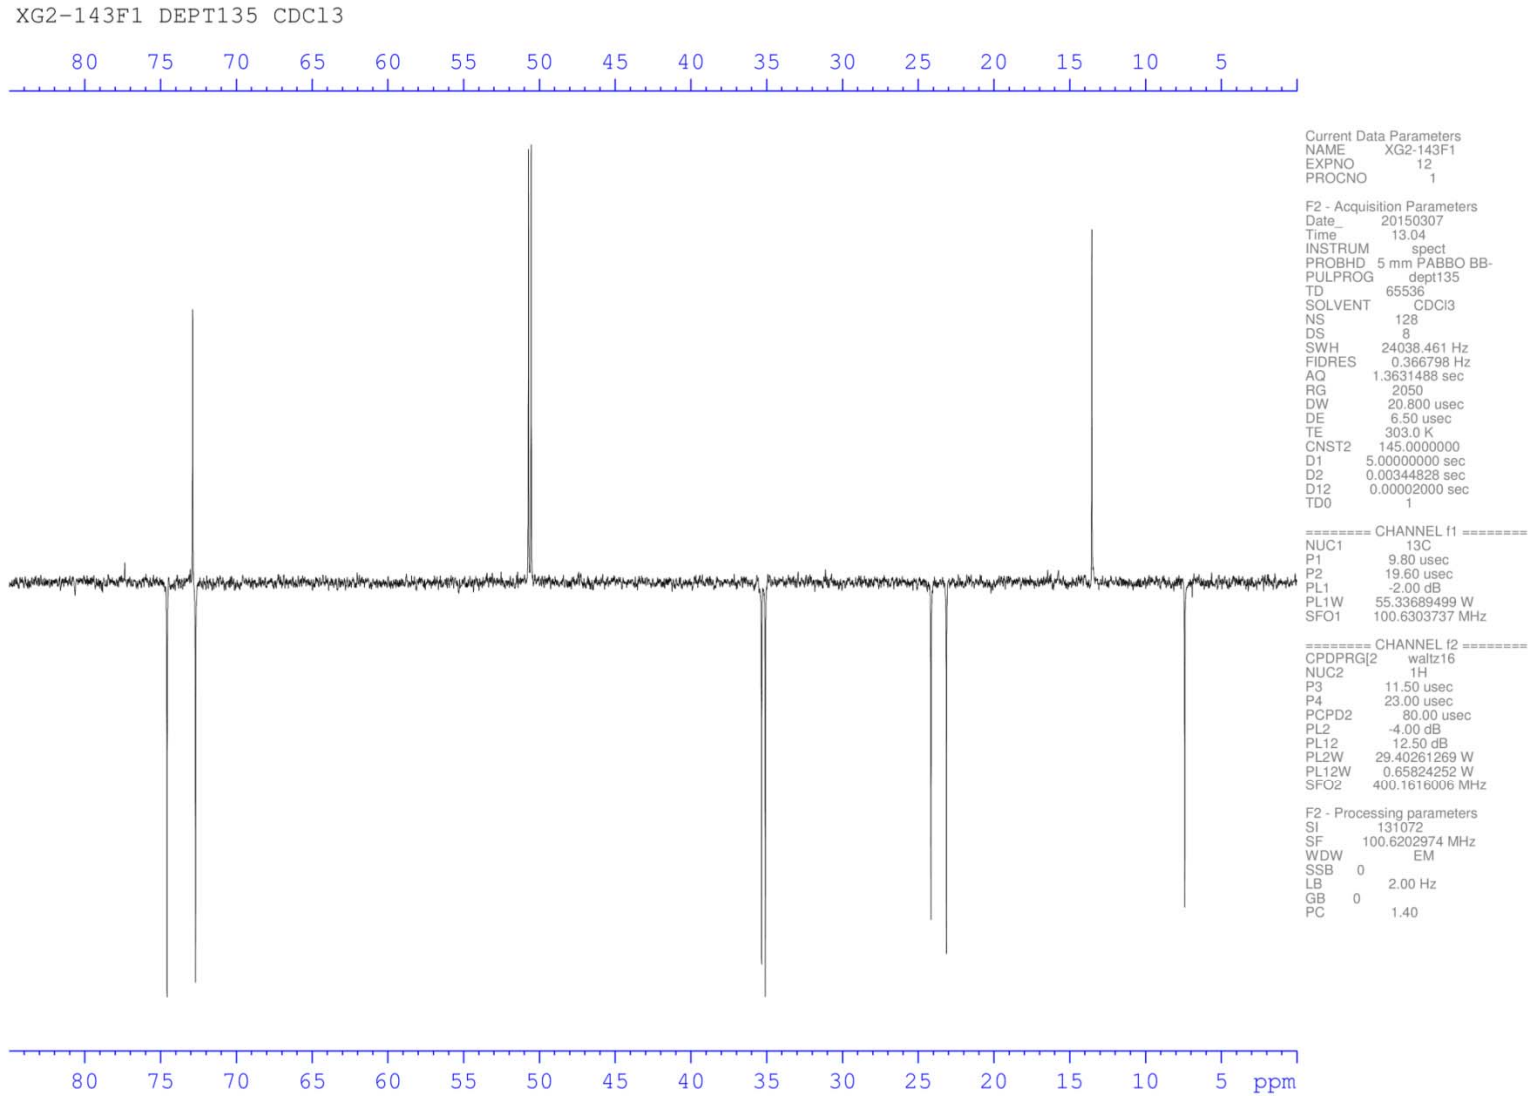

Figure SI\_40: DEPT135 spectrum of compound 8

# SI\_41

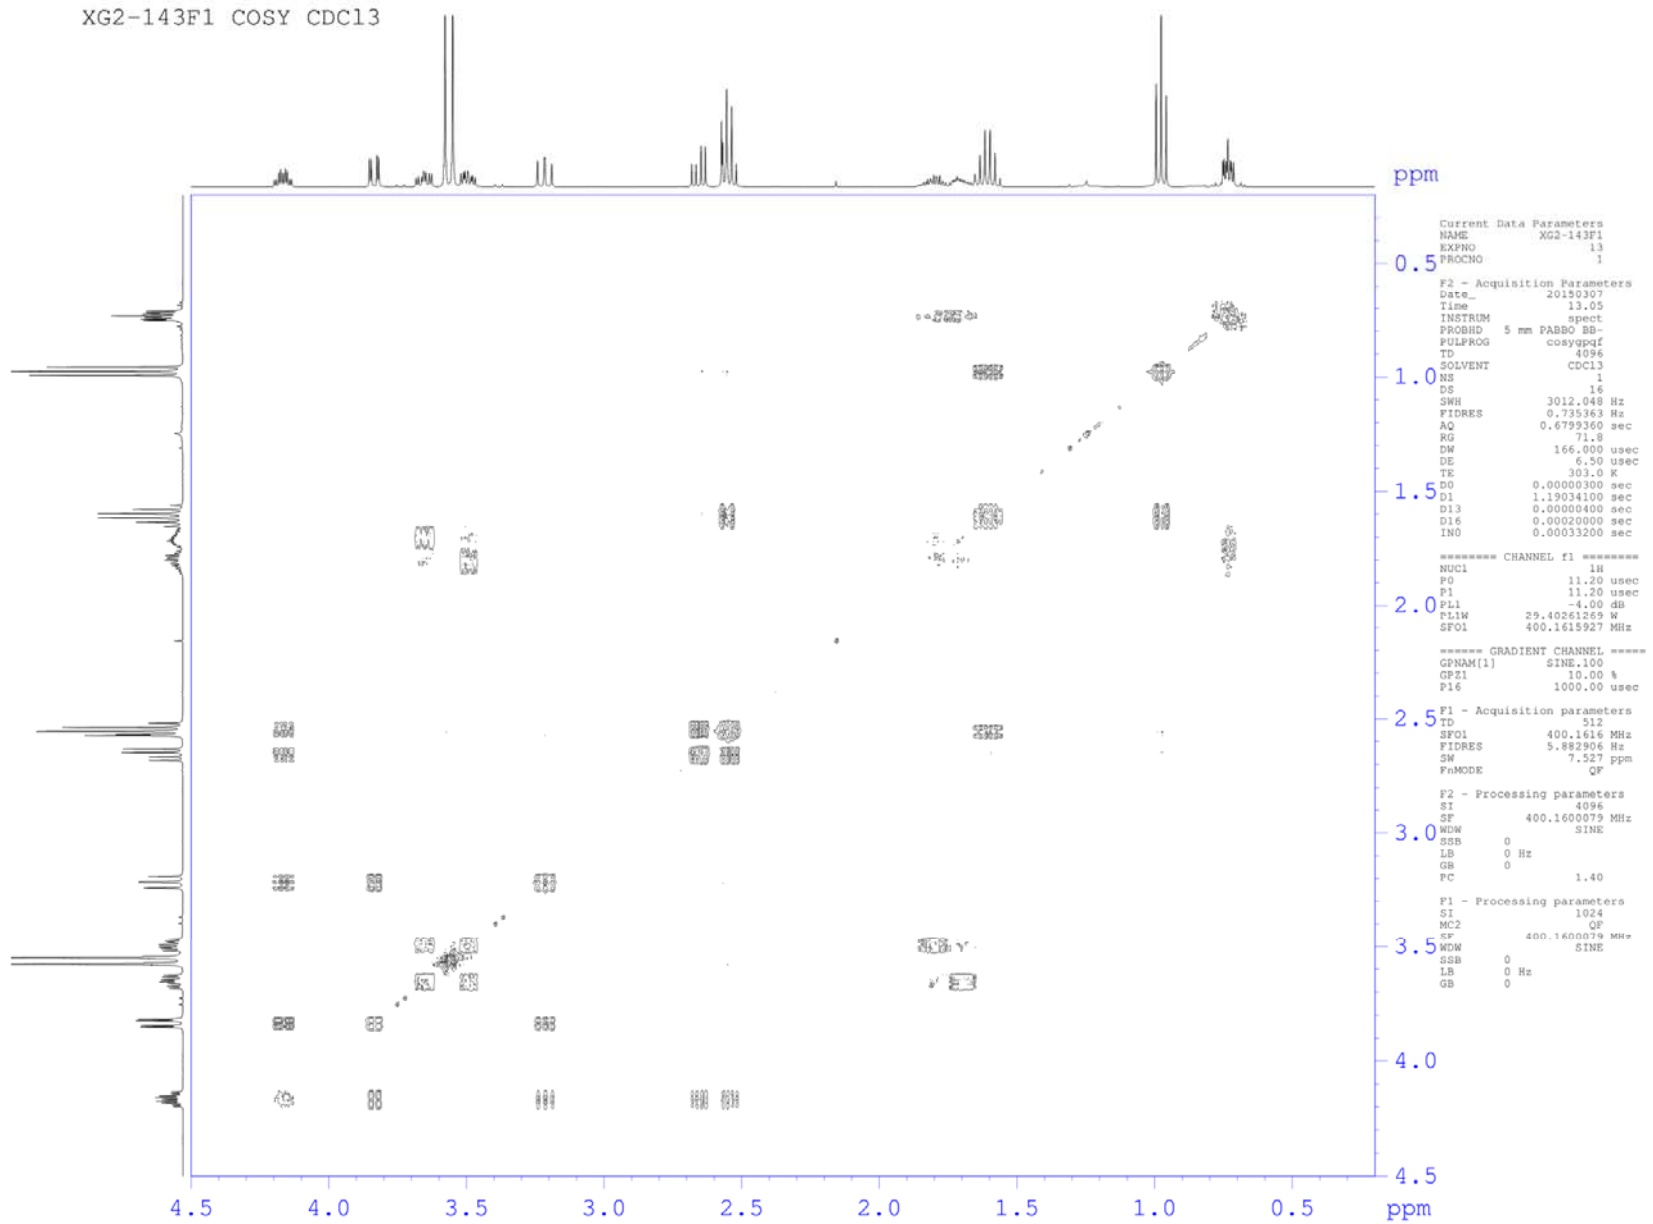

Figure SI\_41:  $^1\text{H}$ - $^1\text{H}$  COSY spectrum of compound 8

# SI\_42

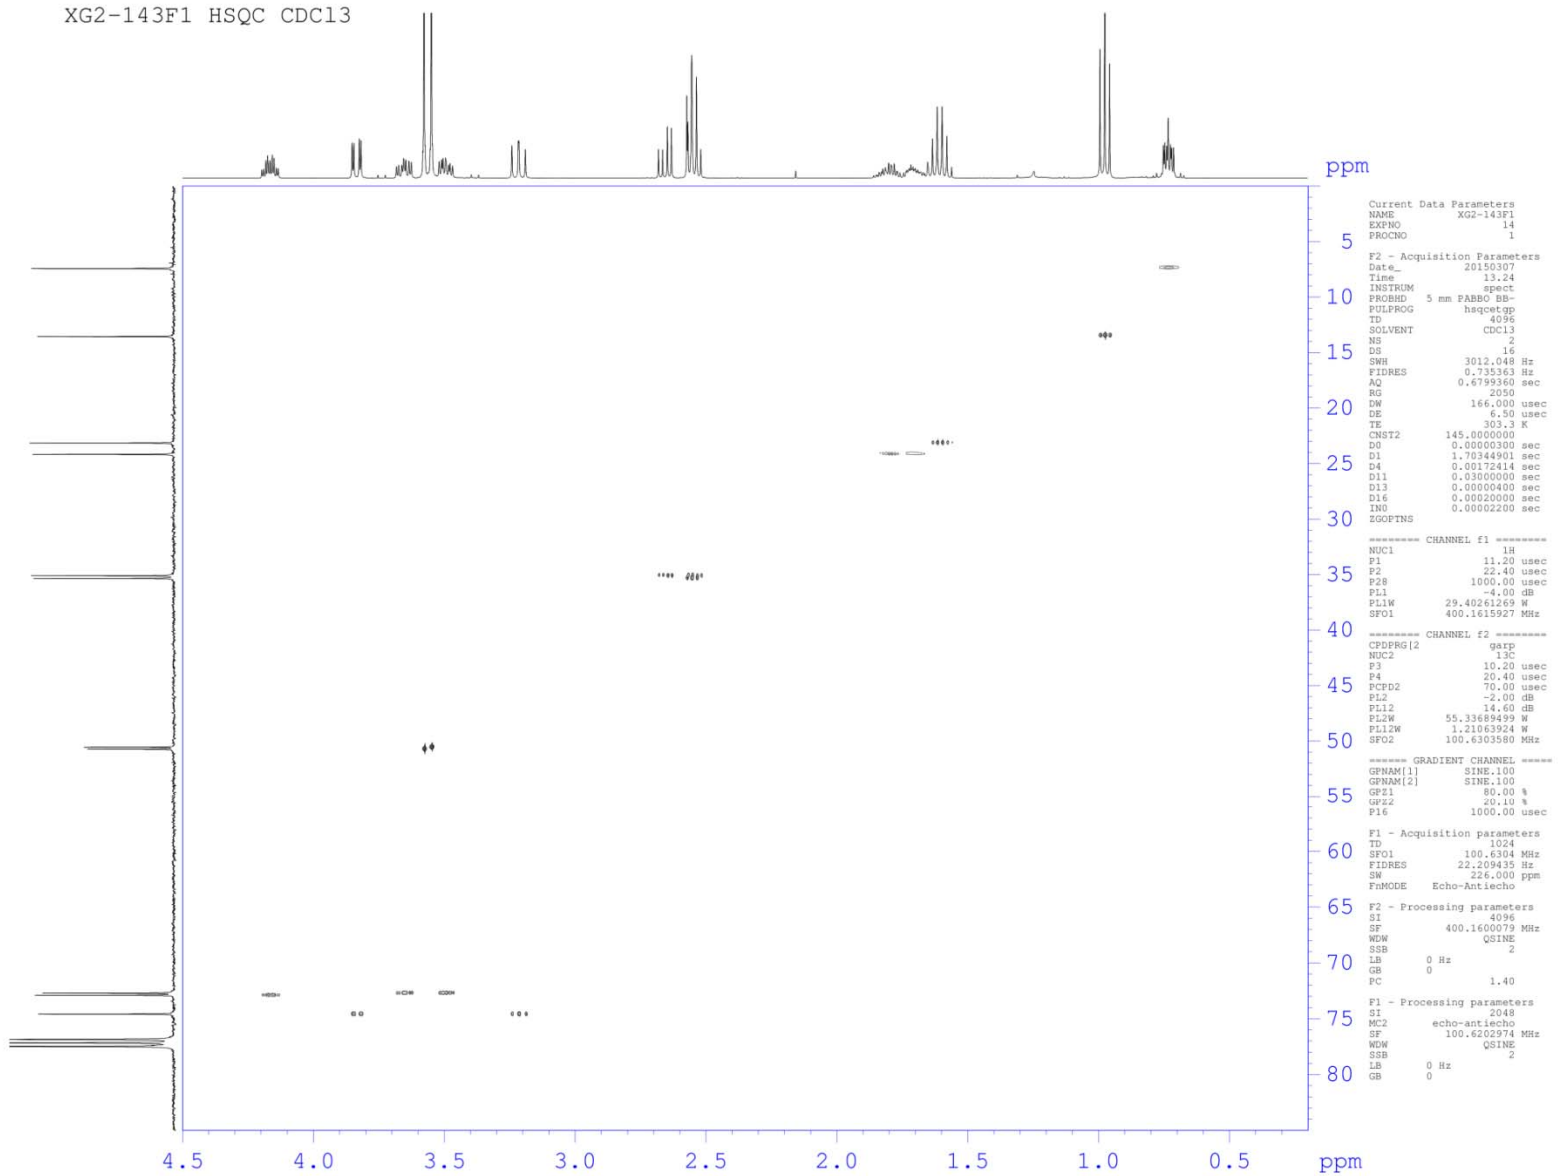

Figure SI\_42: HSQC spectrum of compound 8

# SI\_43

XG2-143F1 HMBC CDC13

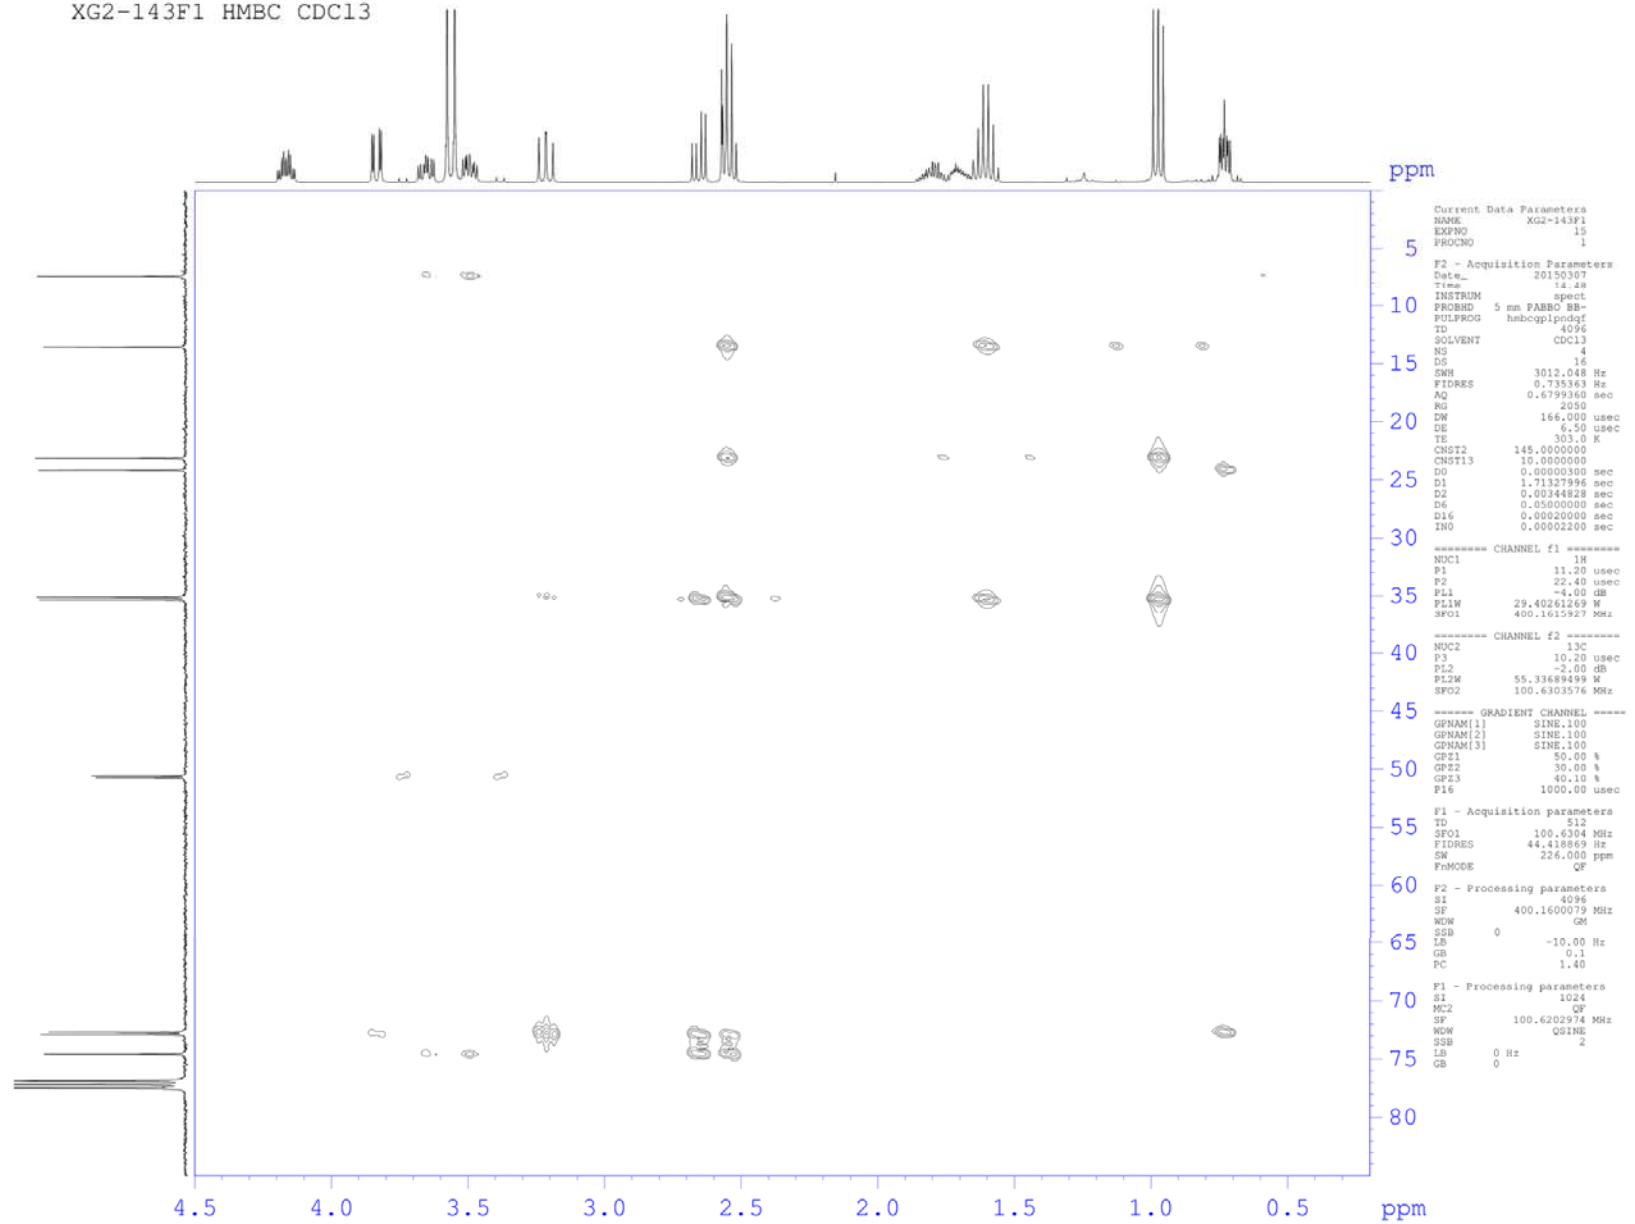

Figure SI\_43: HMBC spectrum of compound 8

# SI\_44

C:\Xcalibur\Data\Iso310-JLB\Xg2143f1  
ci nh3

3/9/2015 10:08:15 AM

Xg2143f1 #11 RT: 0.12 AV: 1 NL: 7.80E8  
F: + c Full ms [ 54.00-1050.00]

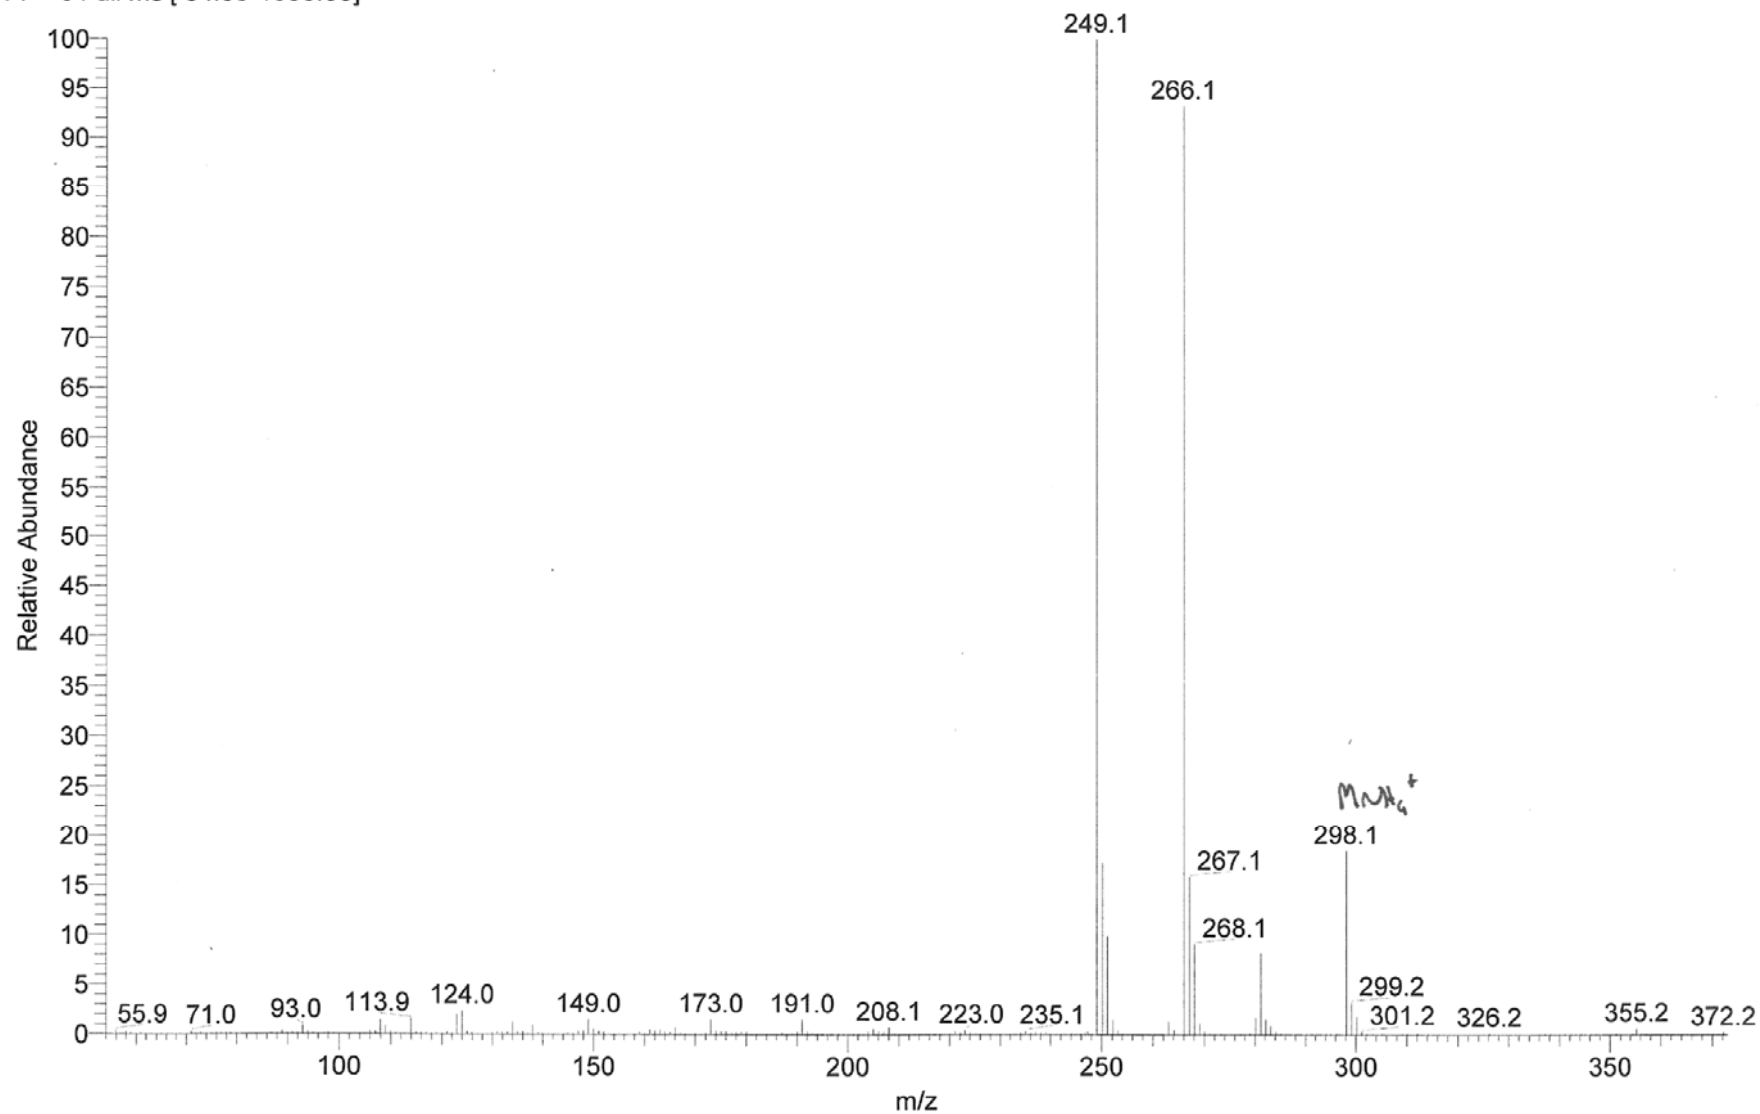

Figure SI\_44: CI-MS of compound 8



# SI\_45

20150323\_XG2-143F1\_b#16 RT: 0.12 AV: 1 NL: 9.12E7  
T: FTMS + p ESI Full ms [150.00-1000.00]

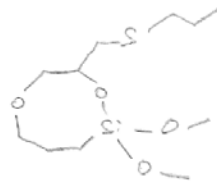

*EM = 280, 12, 5, 10*

**XG2-143F1 – ESI+**  
MeOH+CH<sub>2</sub>Cl<sub>2</sub>

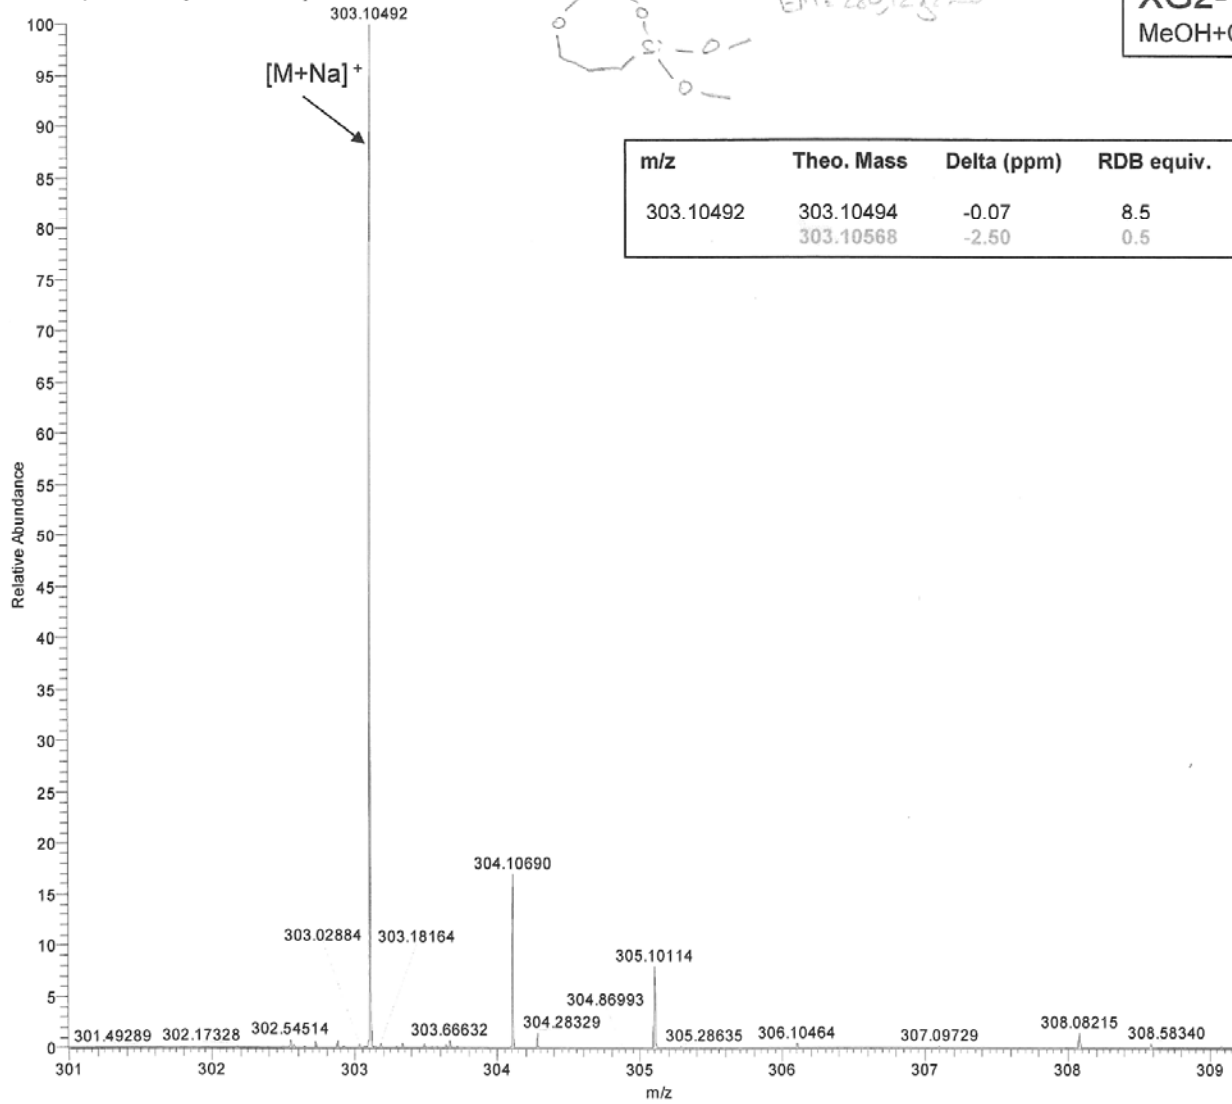

| m/z       | Theo. Mass | Delta (ppm) | RDB equiv. | Composition        |
|-----------|------------|-------------|------------|--------------------|
| 303.10492 | 303.10494  | -0.07       | 8.5        | C17 H19 O3 S       |
|           | 303.10568  | -2.50       | 0.5        | C11 H24 O4 Na S Si |

Figure SI\_45: HRMS of compound 8

SI\_46

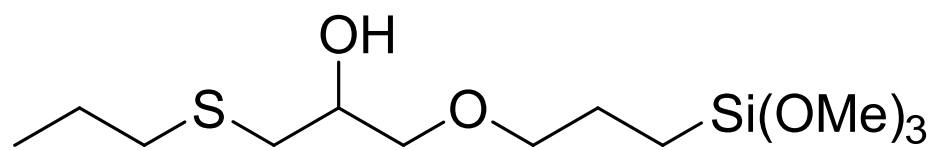

**9**

# SI\_47

XG2-143F4 1H CDC13

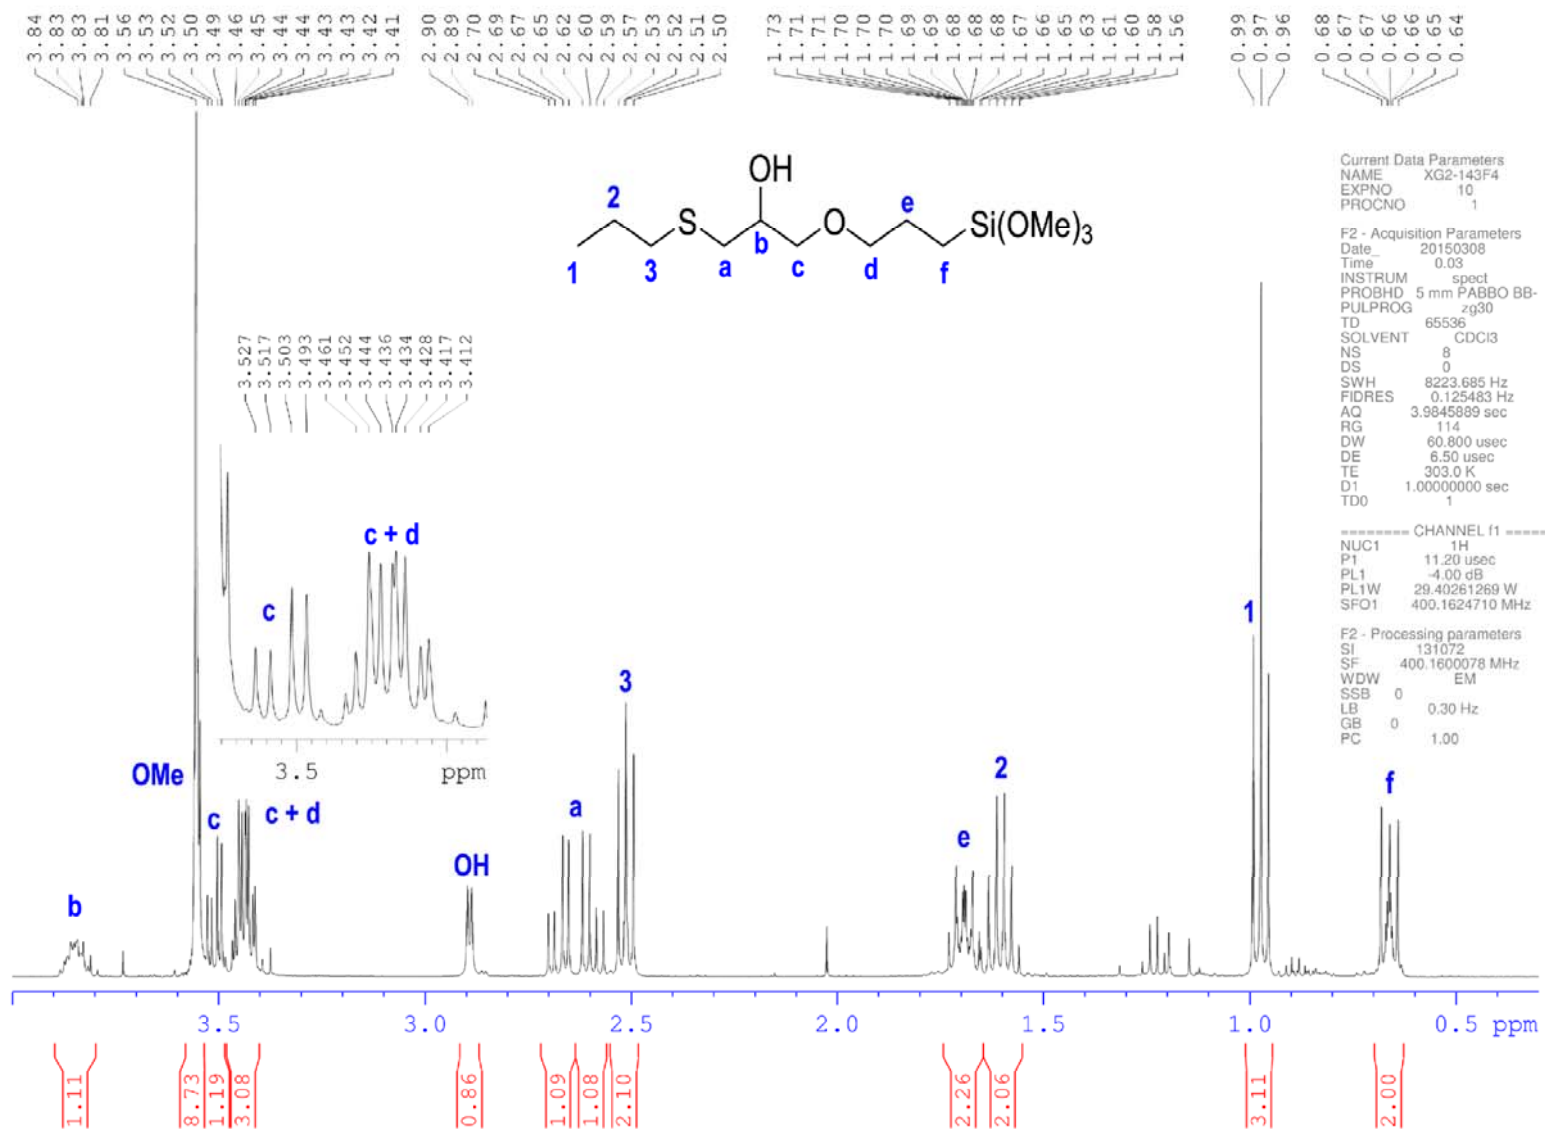

Figure SI\_47: <sup>1</sup>H NMR spectrum of compound 9

# SI\_48

XG2-143F4 13C CDC13

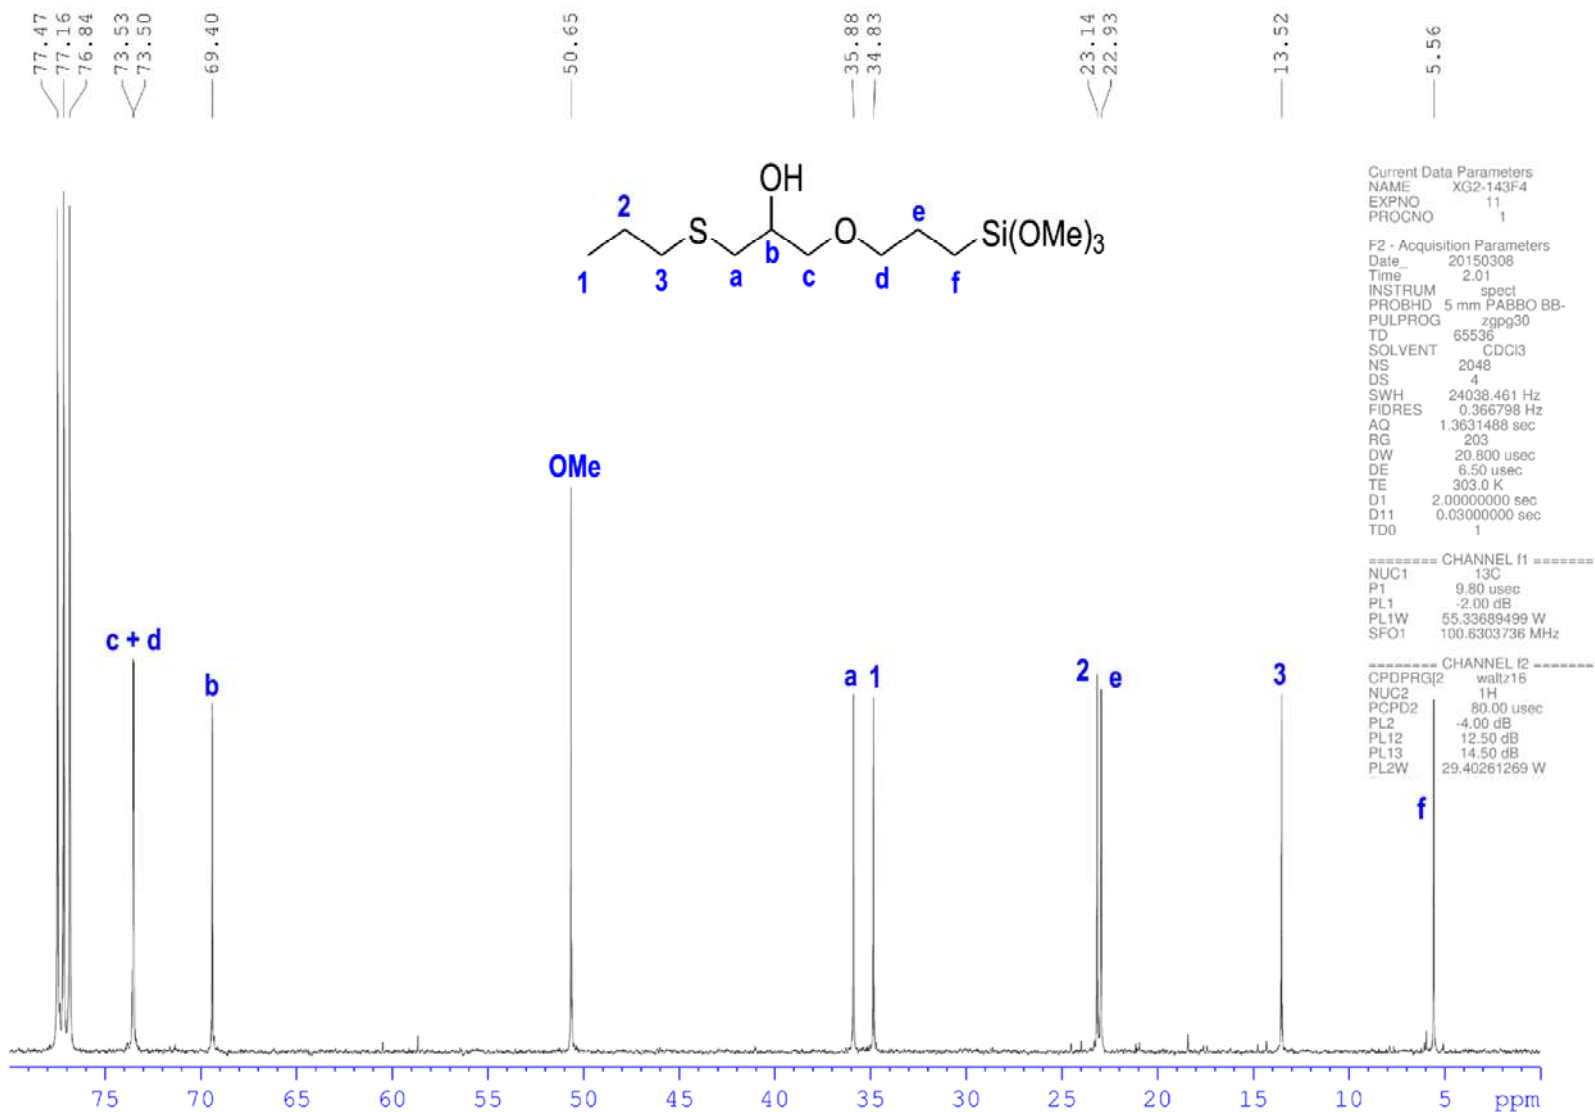

Figure SI\_48: <sup>13</sup>C NMR spectrum of compound 9

# SI\_49

XG2-143F4 CDC13 DEPT135

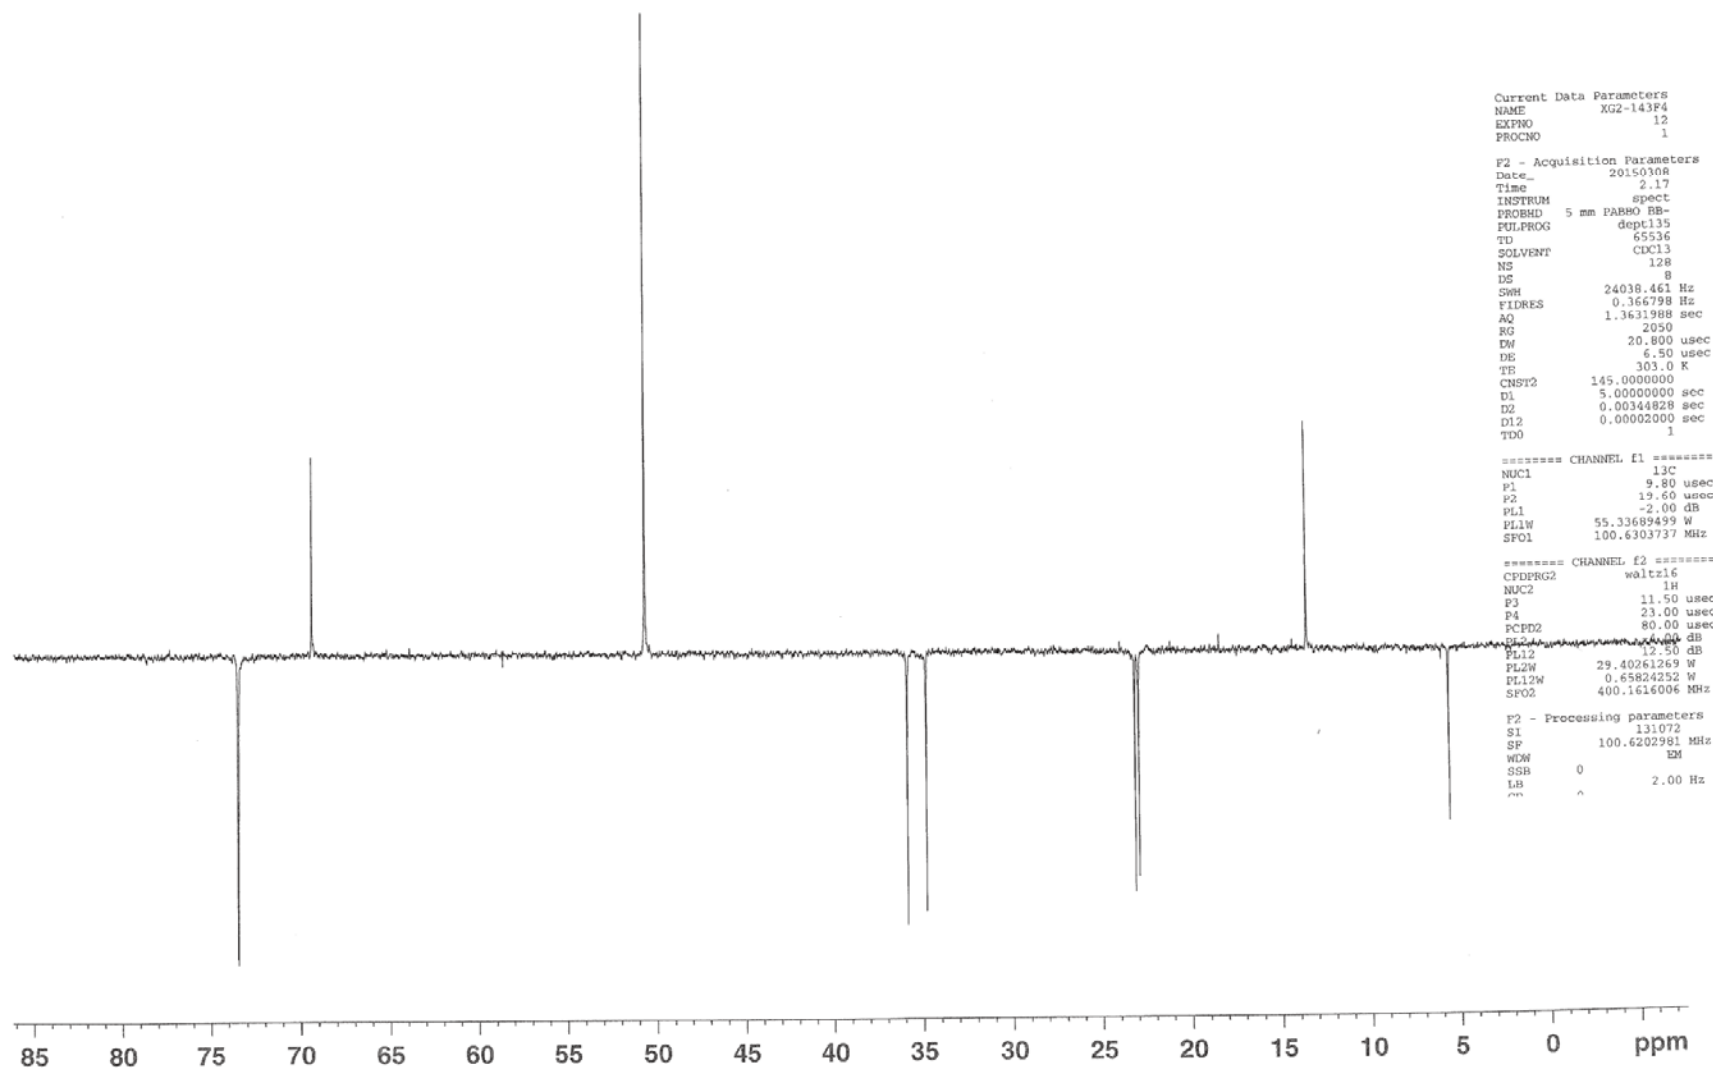

Figure SI\_49: DEPT 135 spectrum of compound 9

# SI\_50

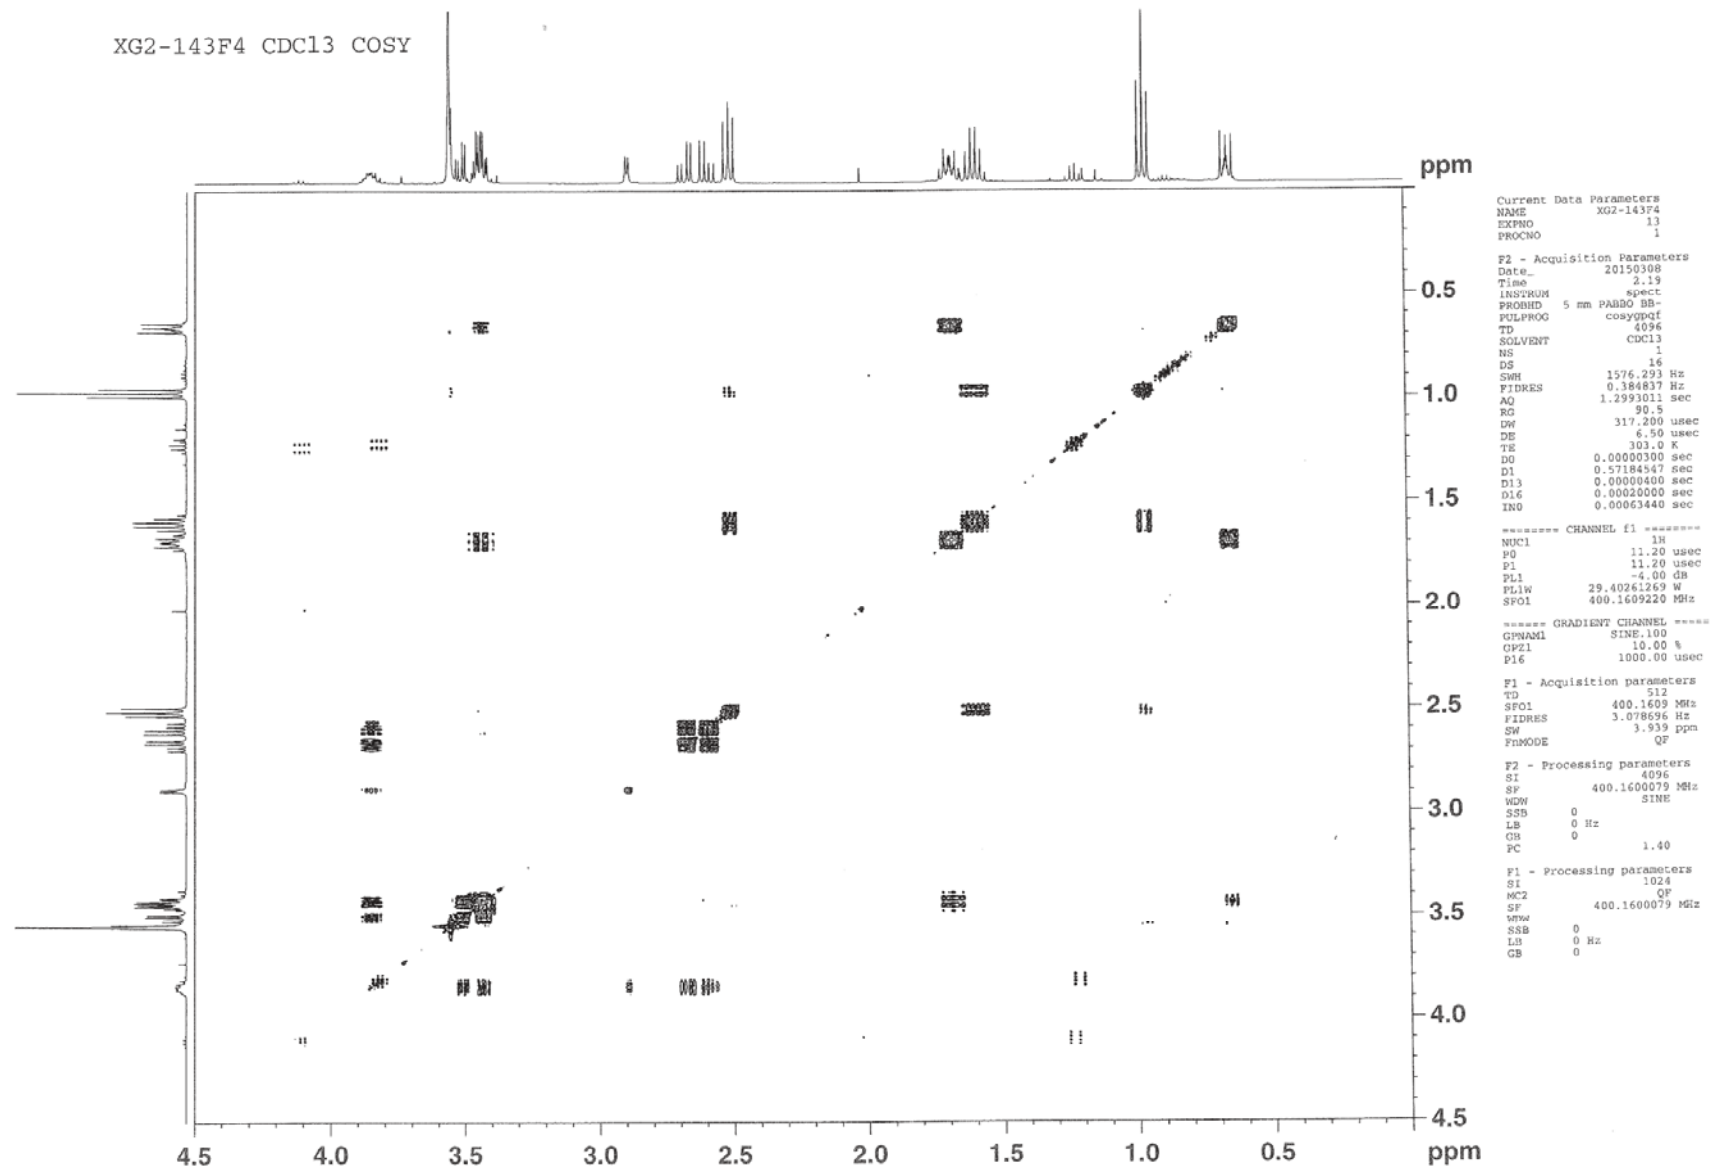

Figure SI\_50:  $^1\text{H}$ - $^1\text{H}$  COSY spectrum of compound 9

# SI\_51

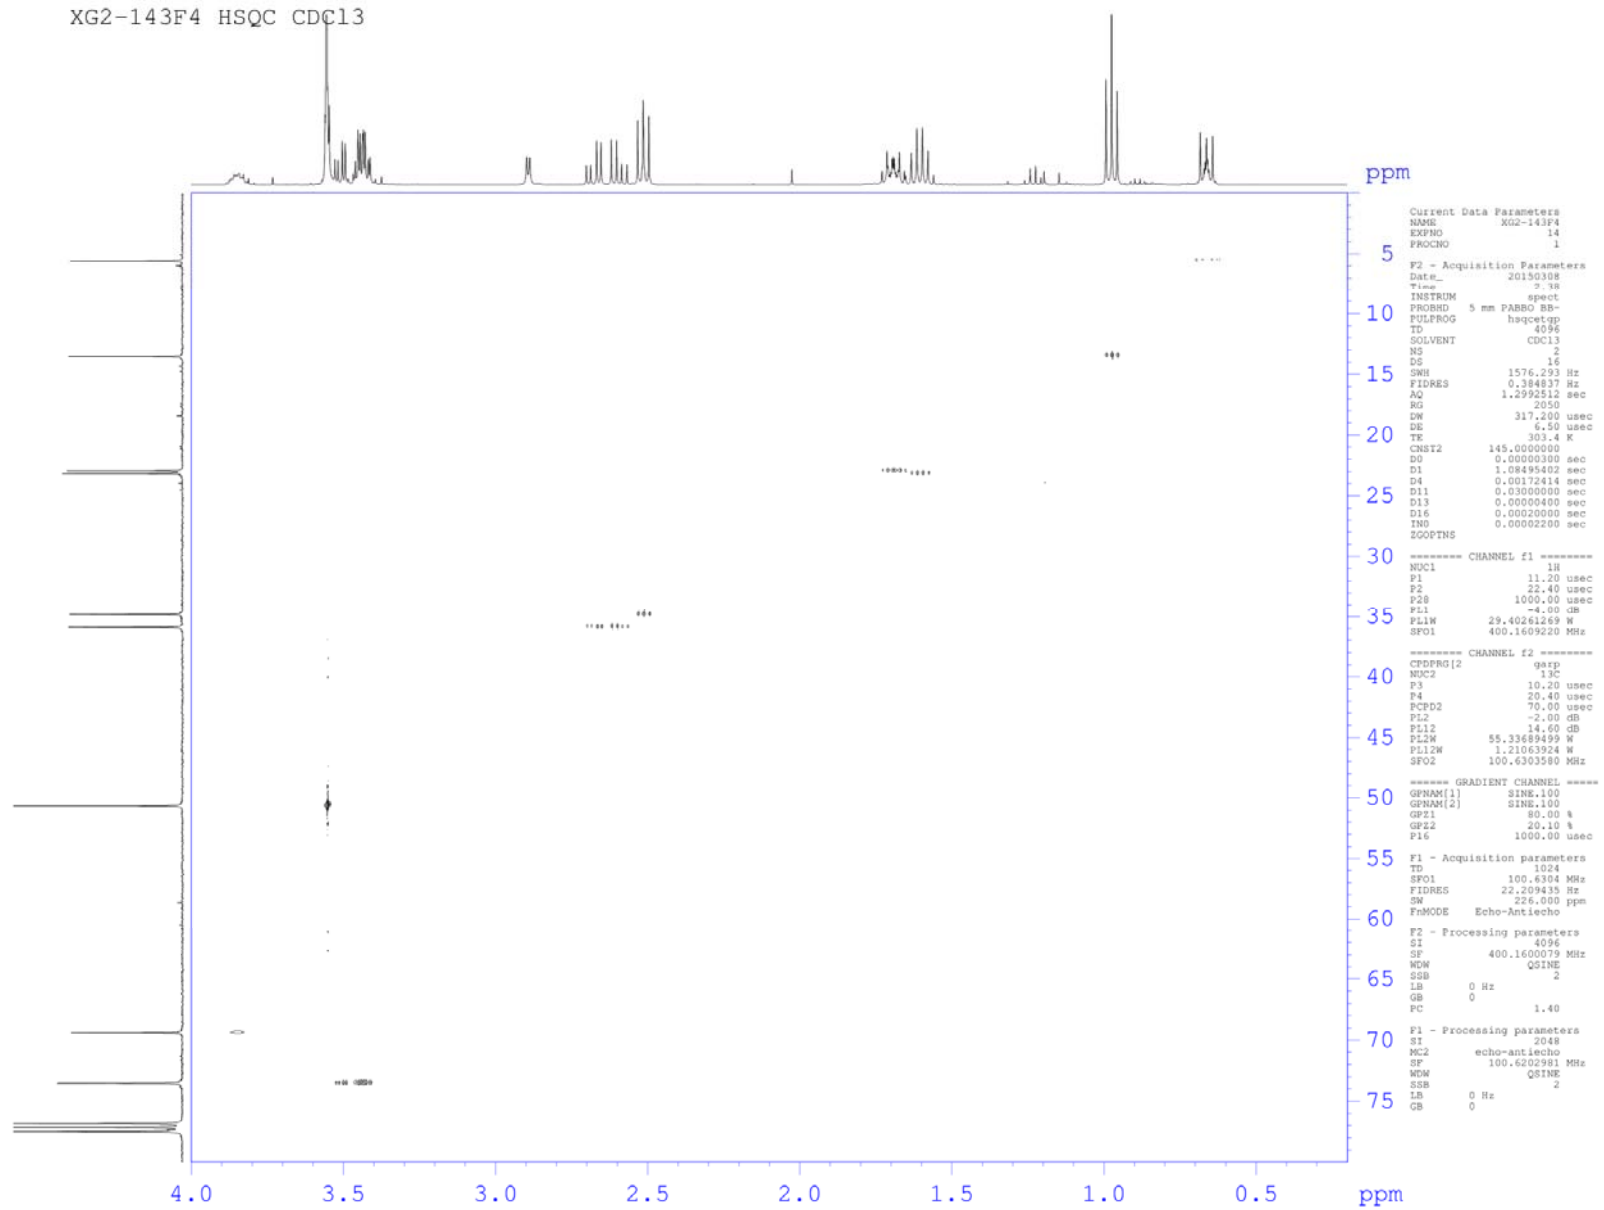

Figure SI\_51: HSQC spectrum of compound 9

# SI\_52

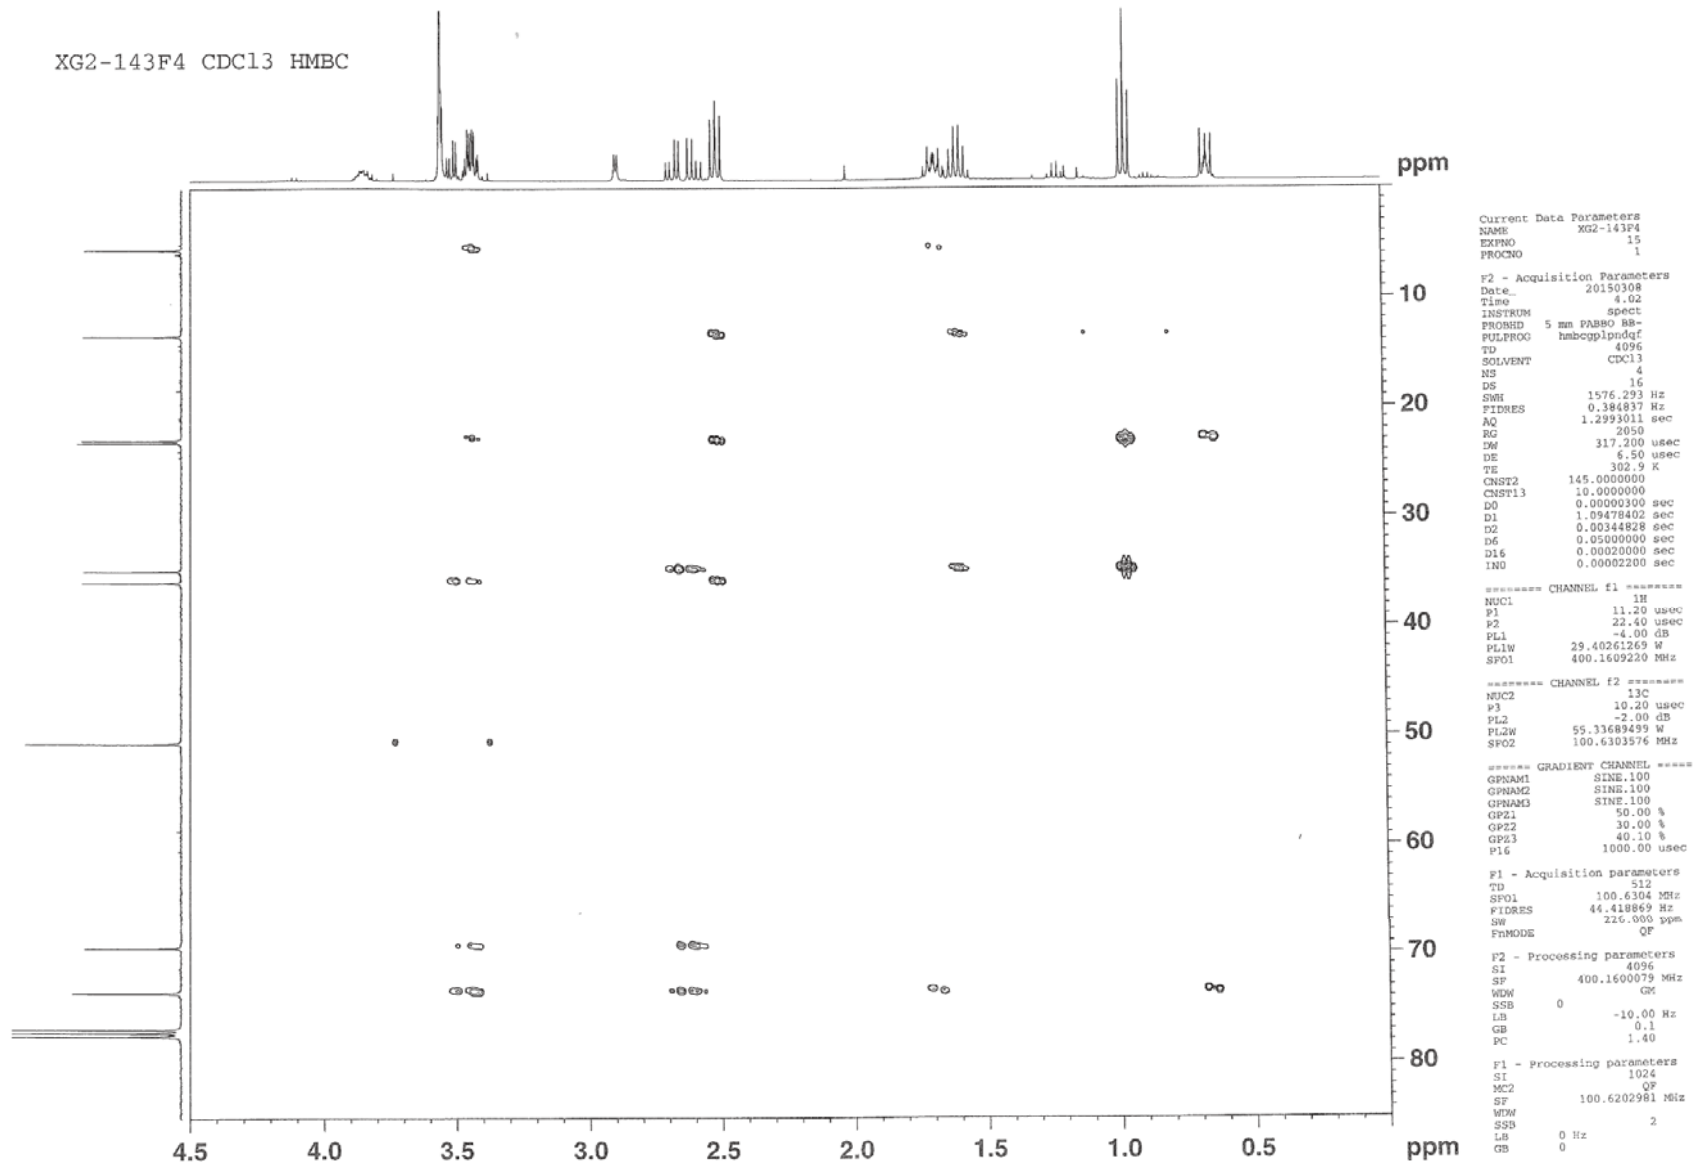

Figure SI\_52: HMBC spectrum of compound 9



# SI\_53

C:\Xcalibur\Data\Iso310-JLB\Xg2143f4

3/9/2015 10:34:42 AM

ci nh3

Xg2143f4 #19 RT: 0.17 AV: 1 NL: 4.06E8

F: + c Full ms [ 54.00-1050.00]

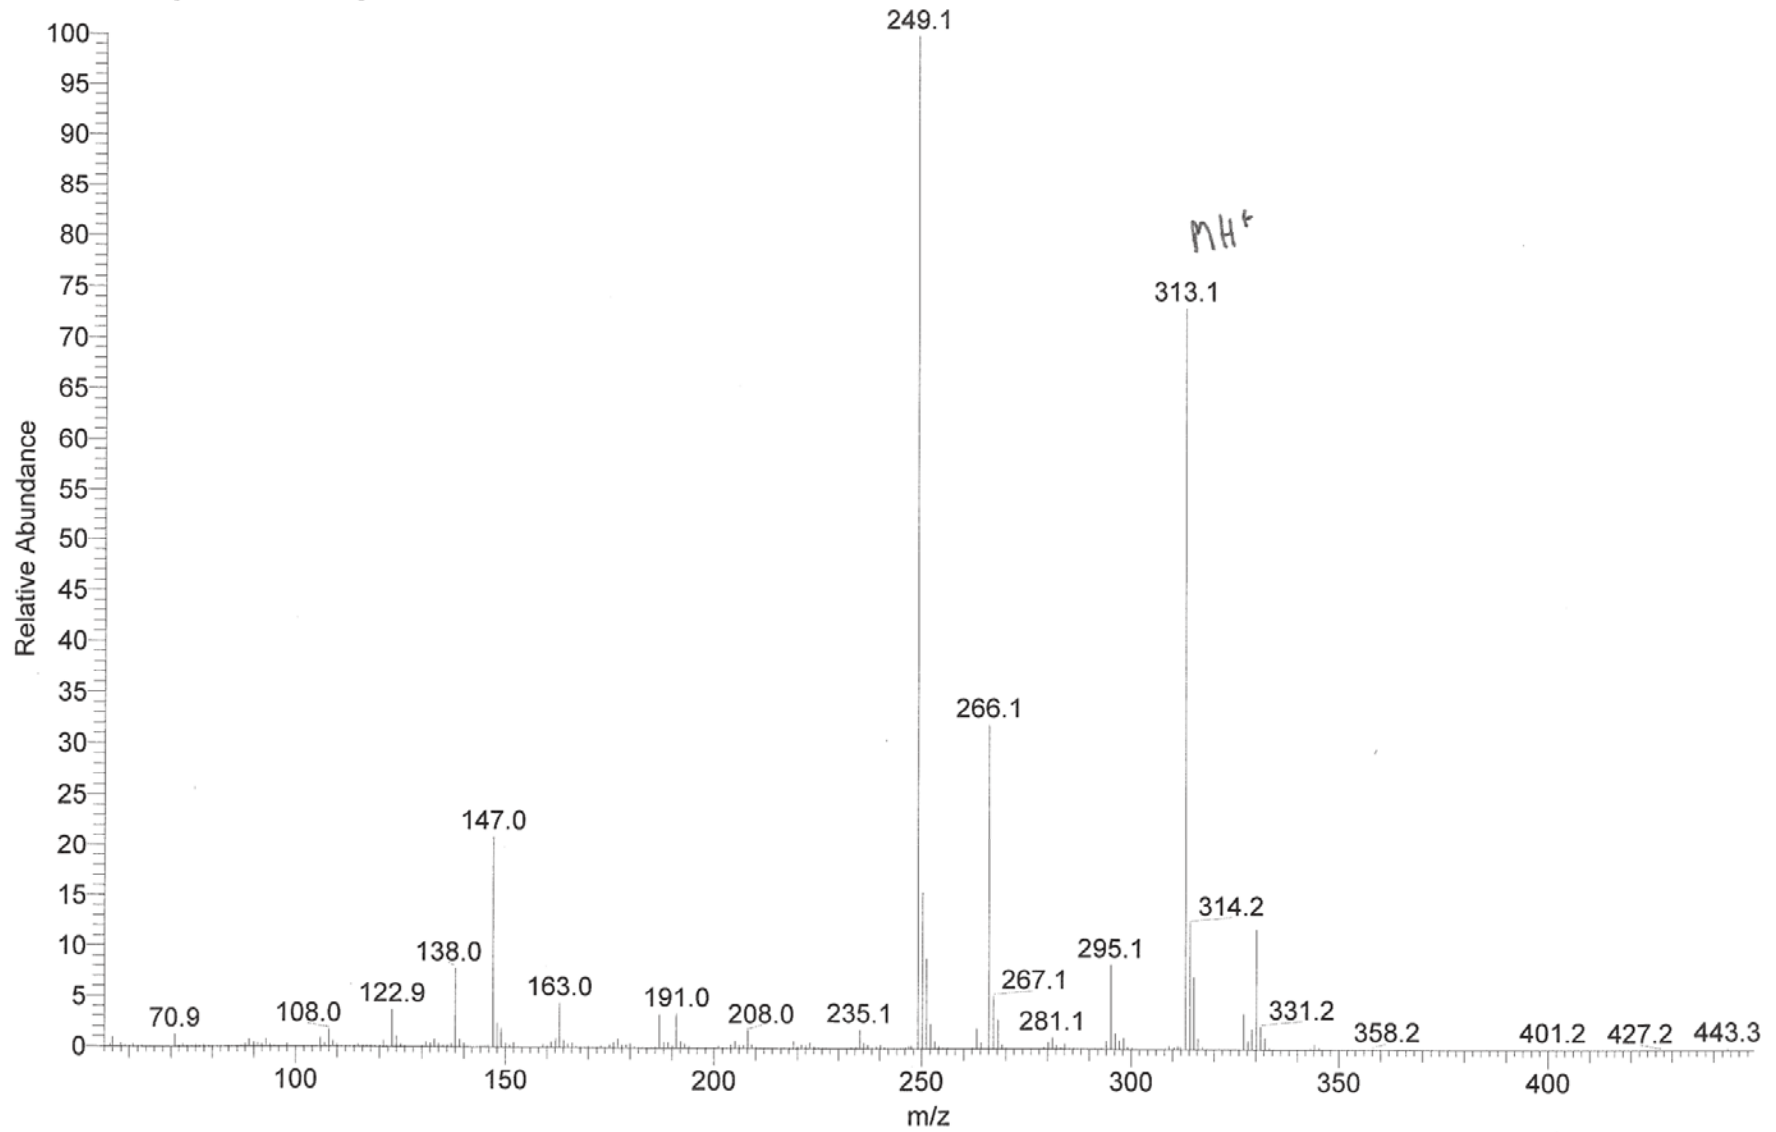

Figure SI\_53: CI-MS spectrum of compound 9

# SI\_54

20150323\_XG2-143F4 #26 RT: 0.20 AV: 1 NL: 9.89E7  
T: FTMS + p ESI Full ms [150.00-1000.00]

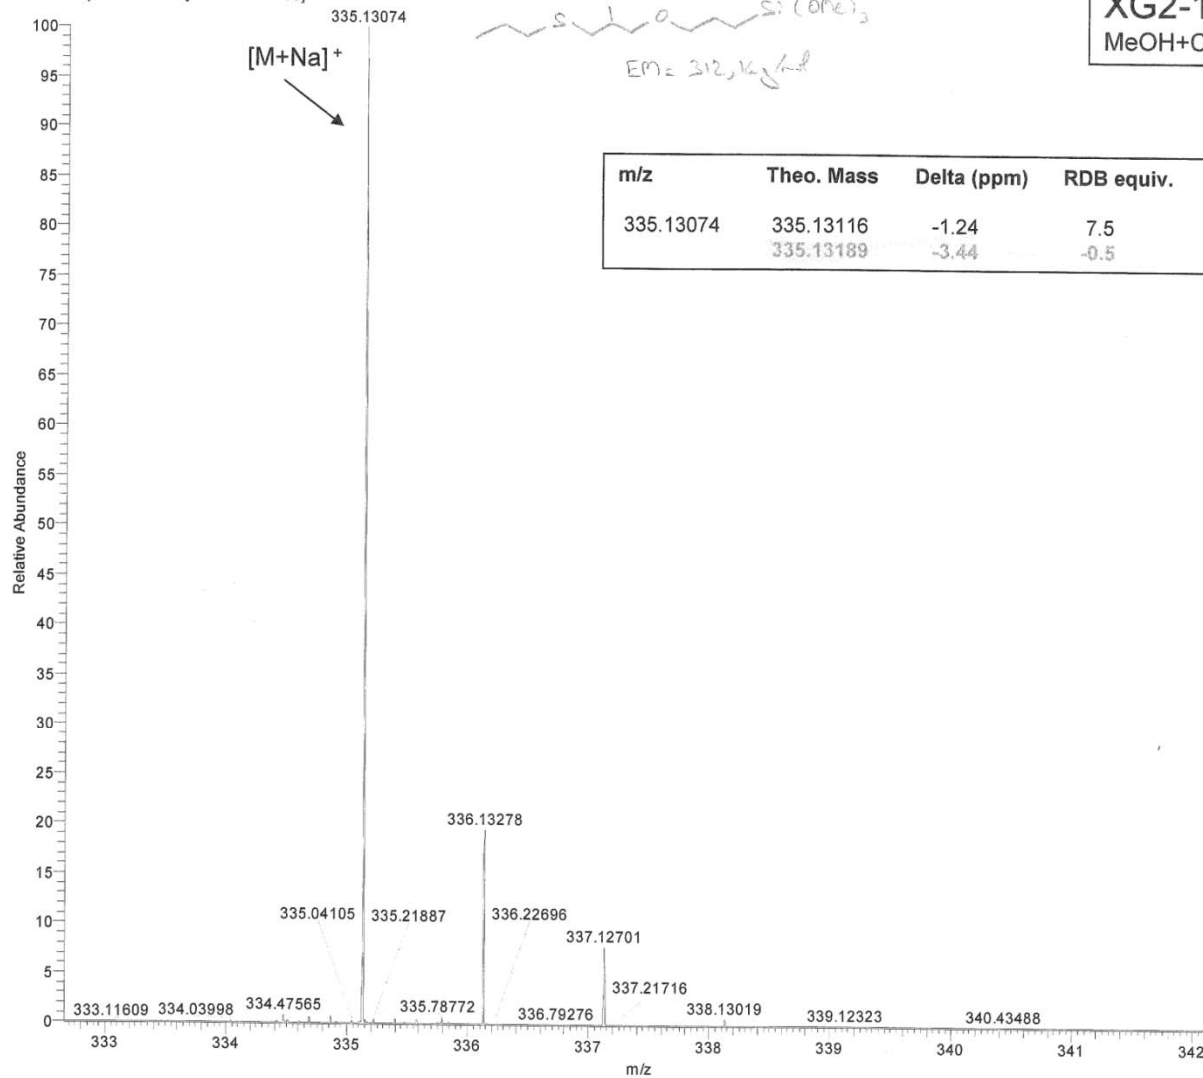

XG2-143F4 – ESI+  
MeOH+CH<sub>2</sub>Cl<sub>2</sub>

Figure SI\_54: HRMS of compound 9

SI\_55

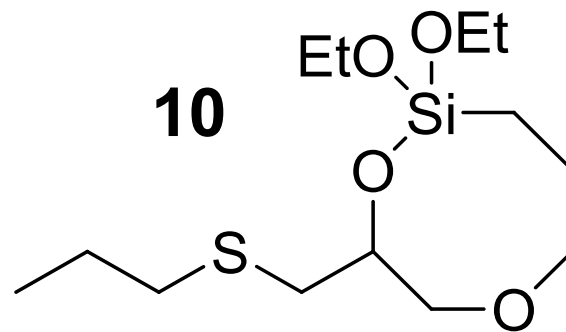

# SI\_56

XG2-145F1 1H CDC13

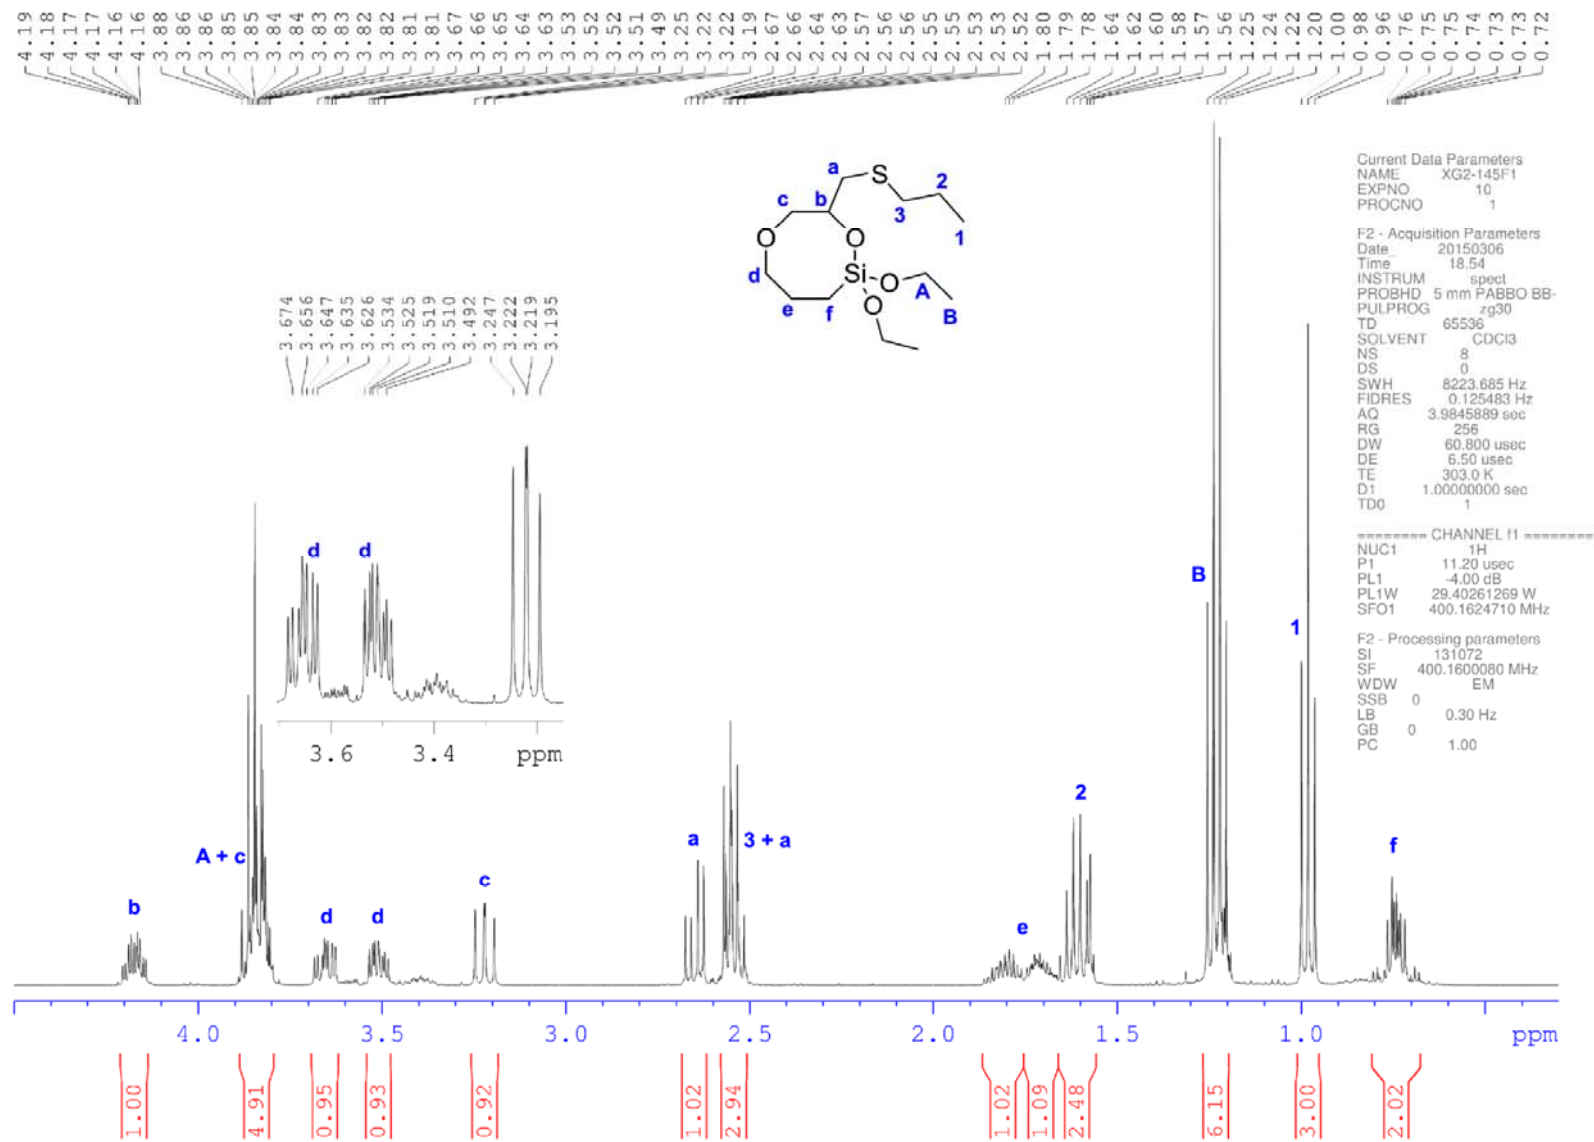

Figure SI\_56: <sup>1</sup>H NMR spectrum of compound 10

# SI\_57

XG2-145F1 13C CDC13

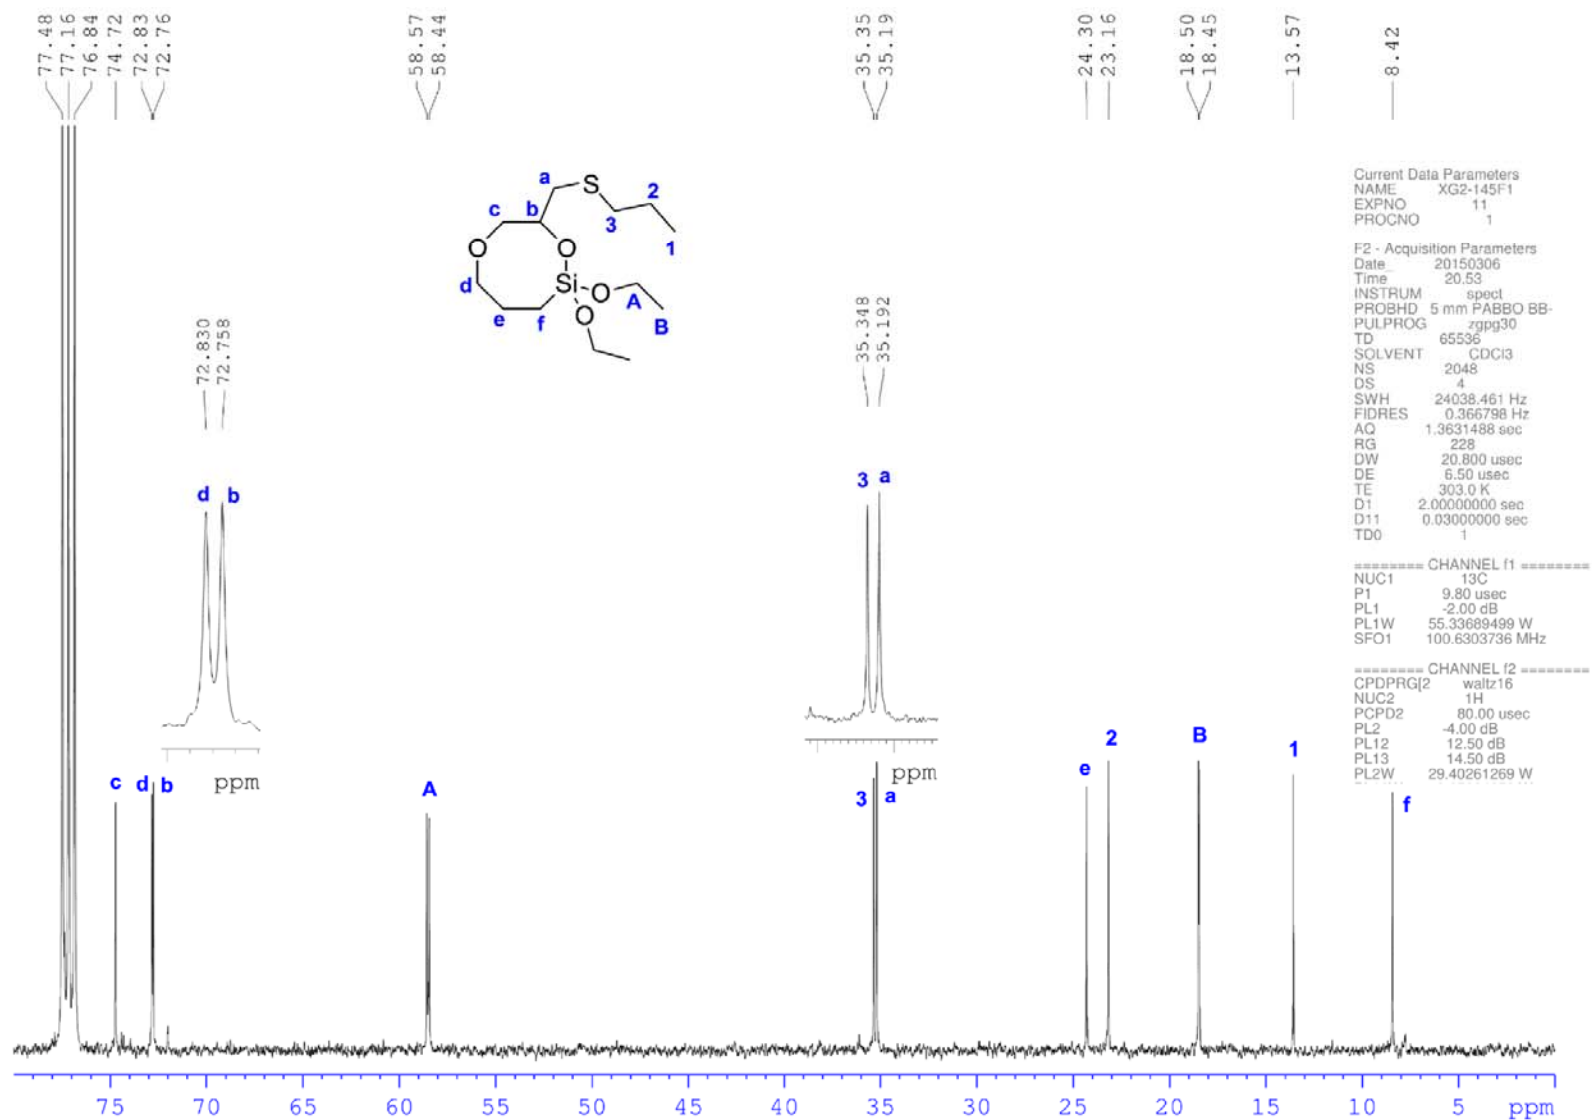

Figure SI\_57: <sup>13</sup>C NMR spectrum of compound 10

# SI\_58

XG2-145F1 DEPT135 CDC13

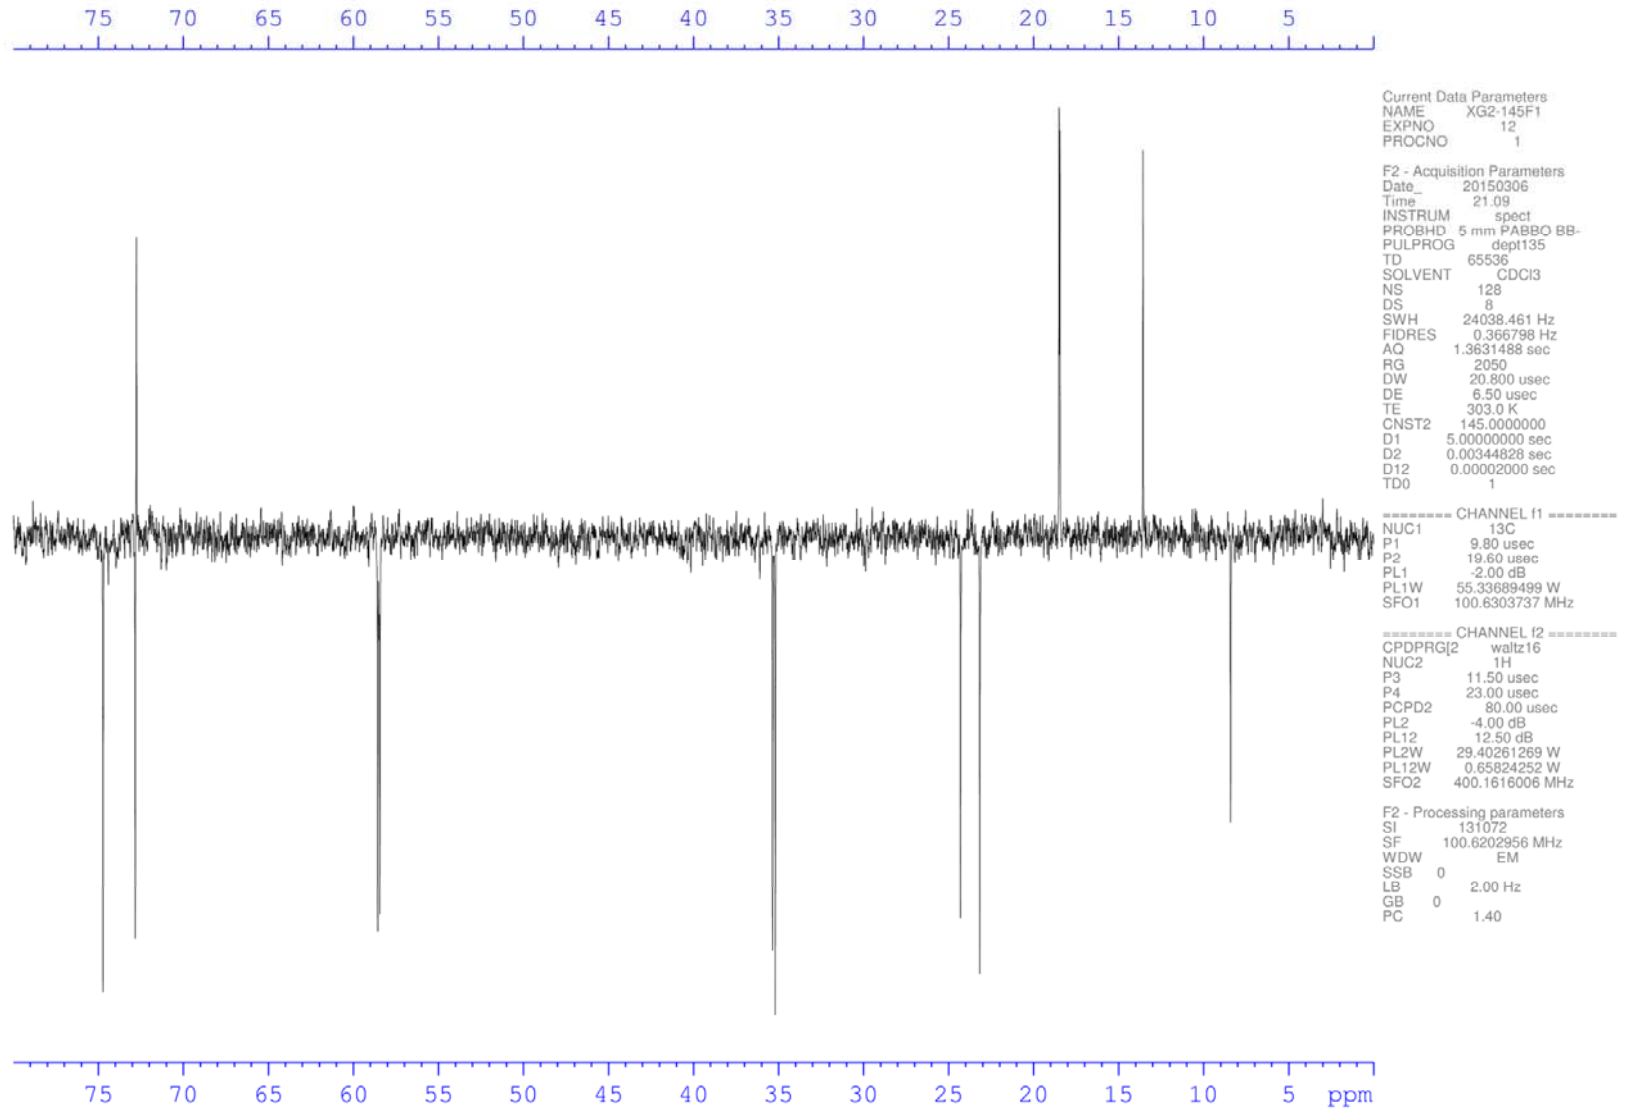

Figure SI\_58: DEPT 135 spectrum of compound 10

# SI\_59

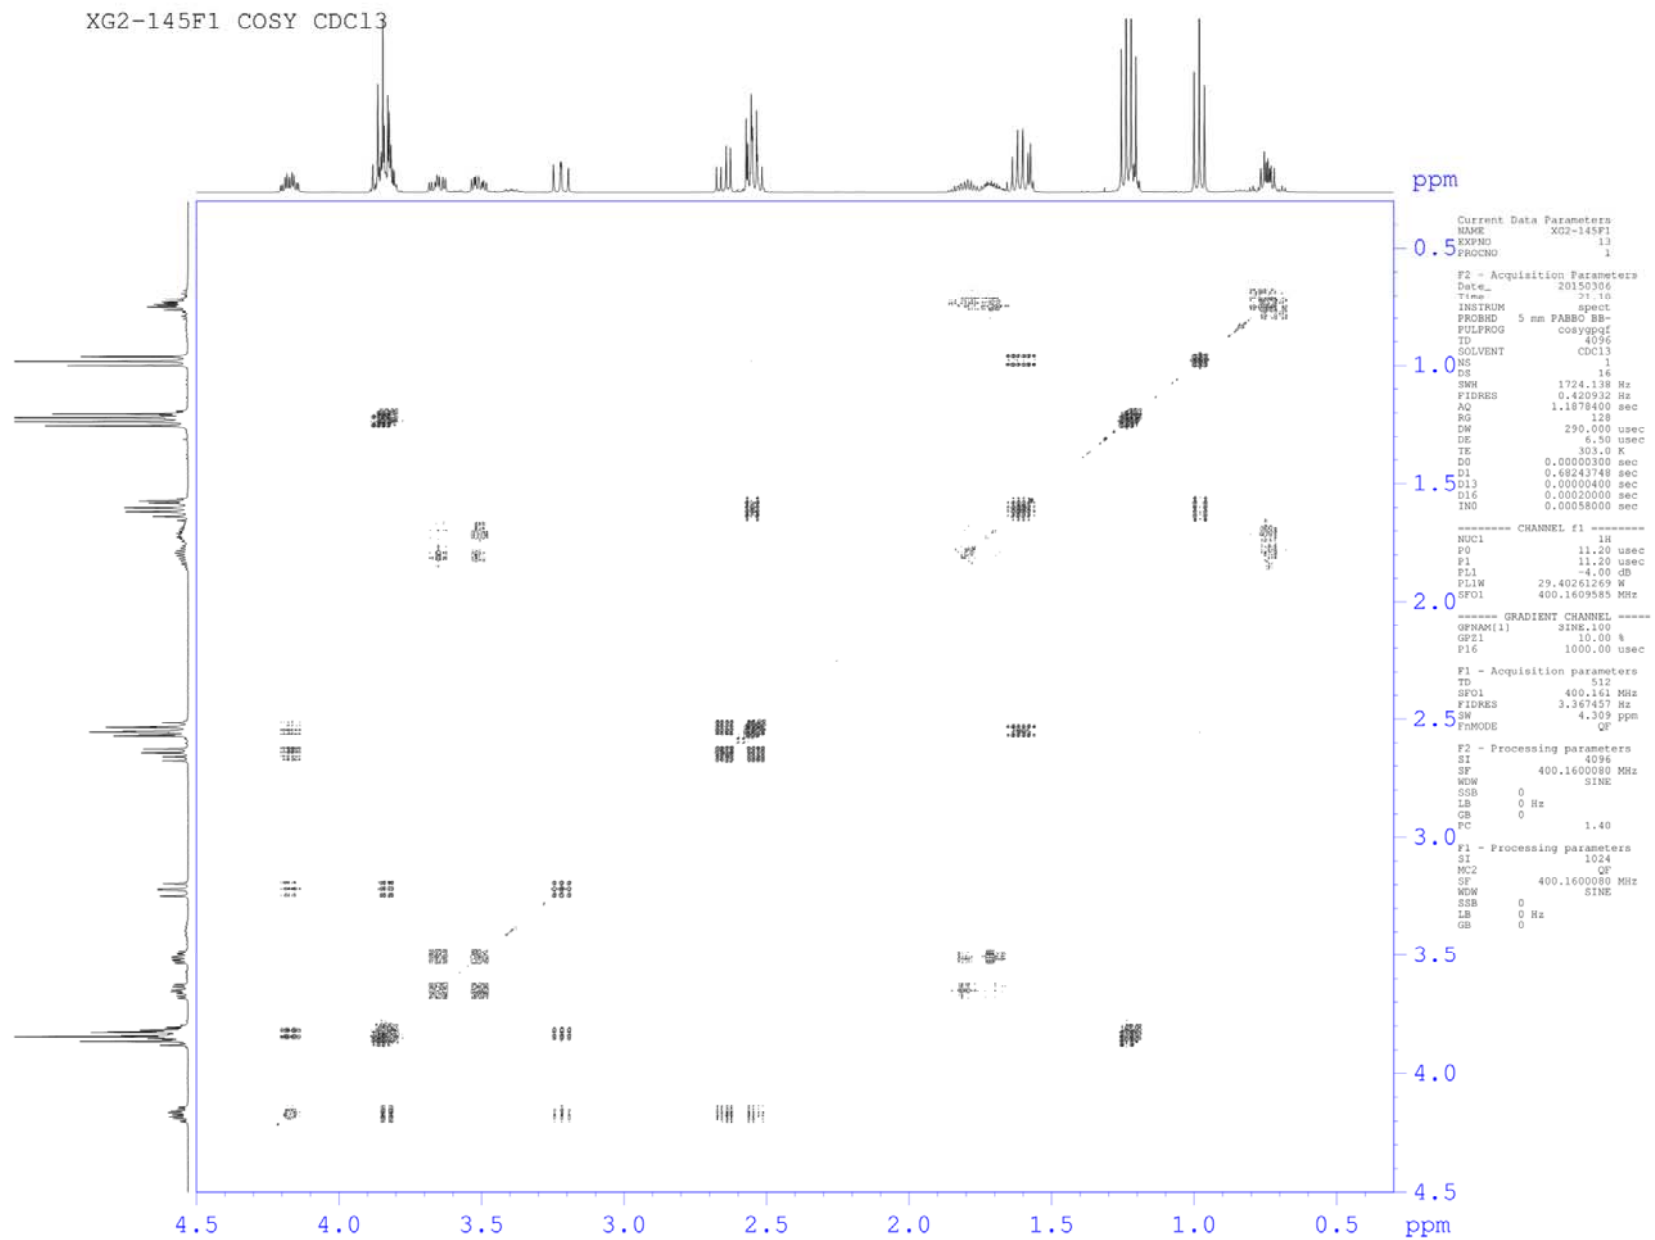

Figure SI\_59:  $^1\text{H}$ - $^1\text{H}$  NMR spectrum of compound 10

# SI\_60

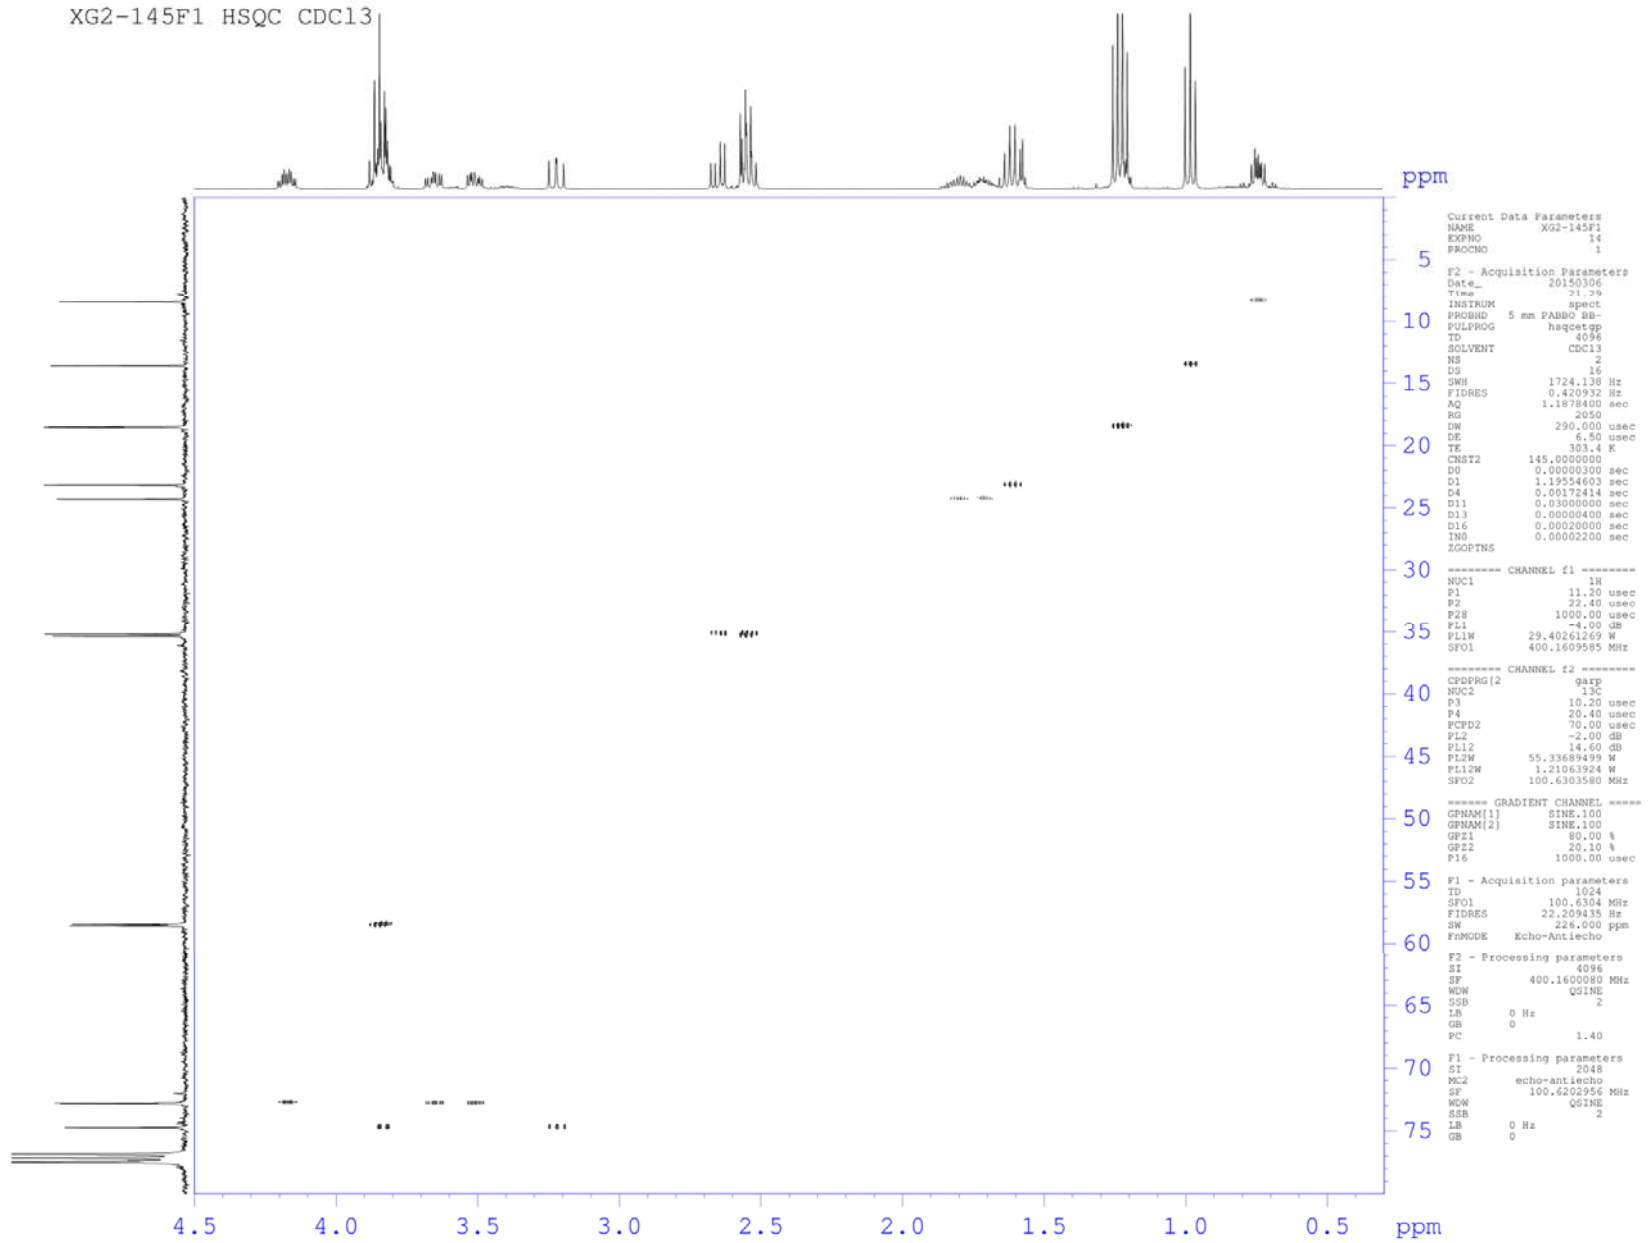

Figure SI\_60: HSQC spectrum of compound 10



# SI\_61

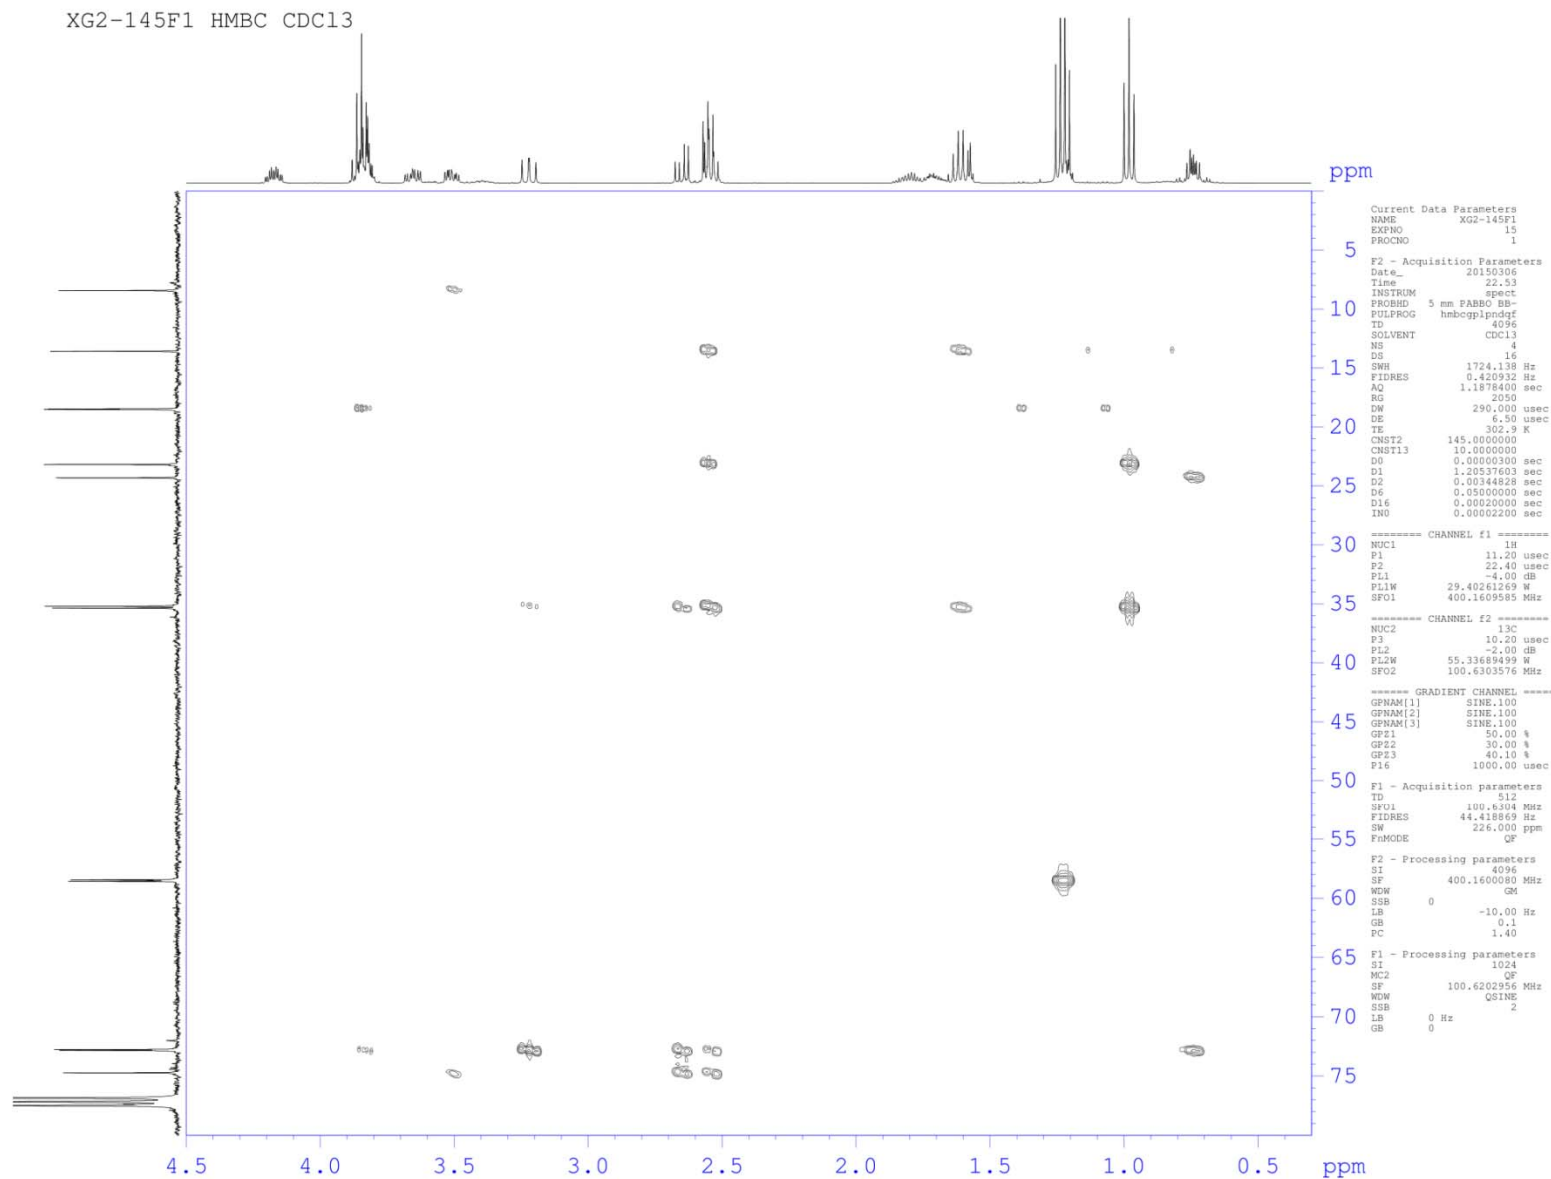

Figure SI\_61: HMBC  $^1\text{H}$  NMR spectrum of compound 10

# SI\_62

C:\Xcalibur\...xg2145f1\_150309111341  
ci nh3

3/9/2015 11:13:41 AM

xg2145f1\_150309111341 #7 RT: 0.07 AV: 1 NL: 1.86E7  
F: + c Full ms [ 54.00-1050.00]

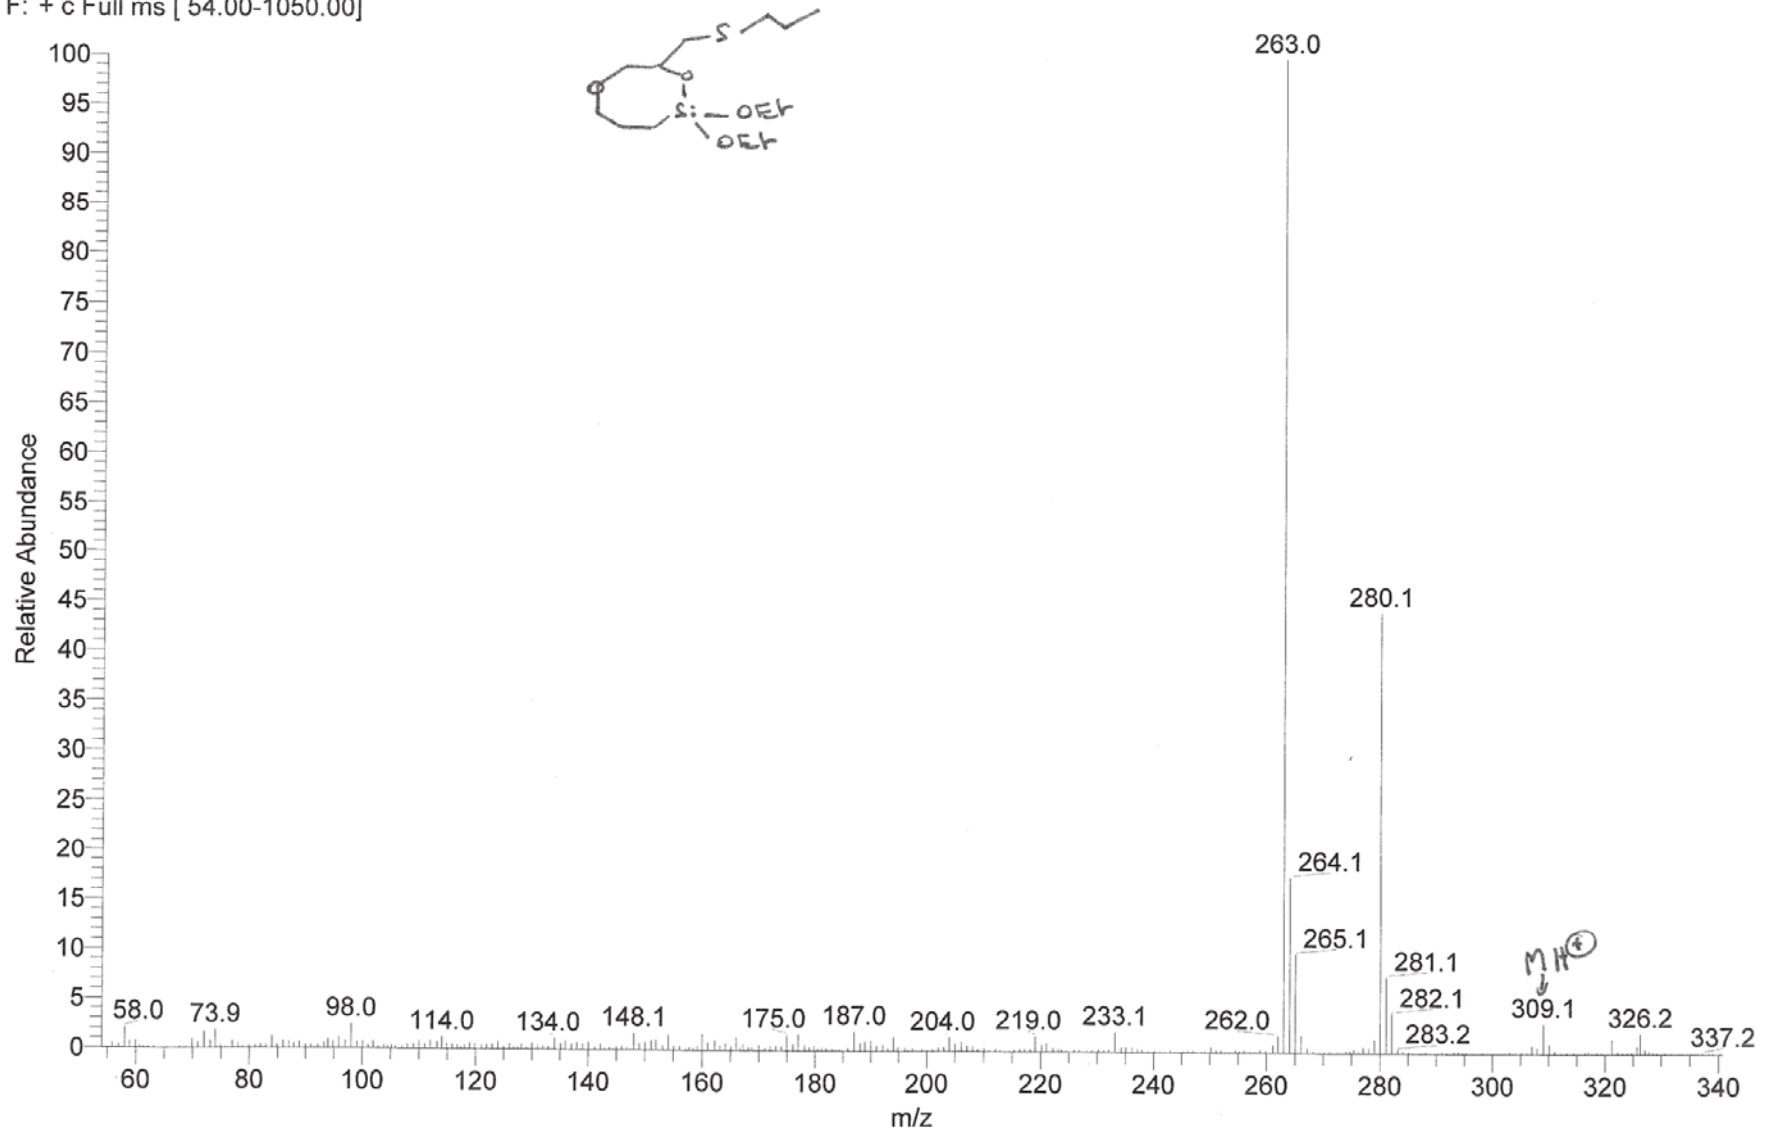

Figure SI\_62: CI-MS spectrum of compound 10

# SI\_63

20150323\_XG2-145F1 #13 RT: 0.10 AV: 1 NL: 1.67E7  
T: FTMS + p ESI Full ms [150.00-1000.00]

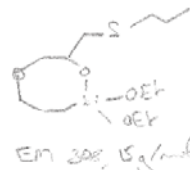

**XG2-145F1 – ESI+**  
MeOH+CH<sub>2</sub>Cl<sub>2</sub>

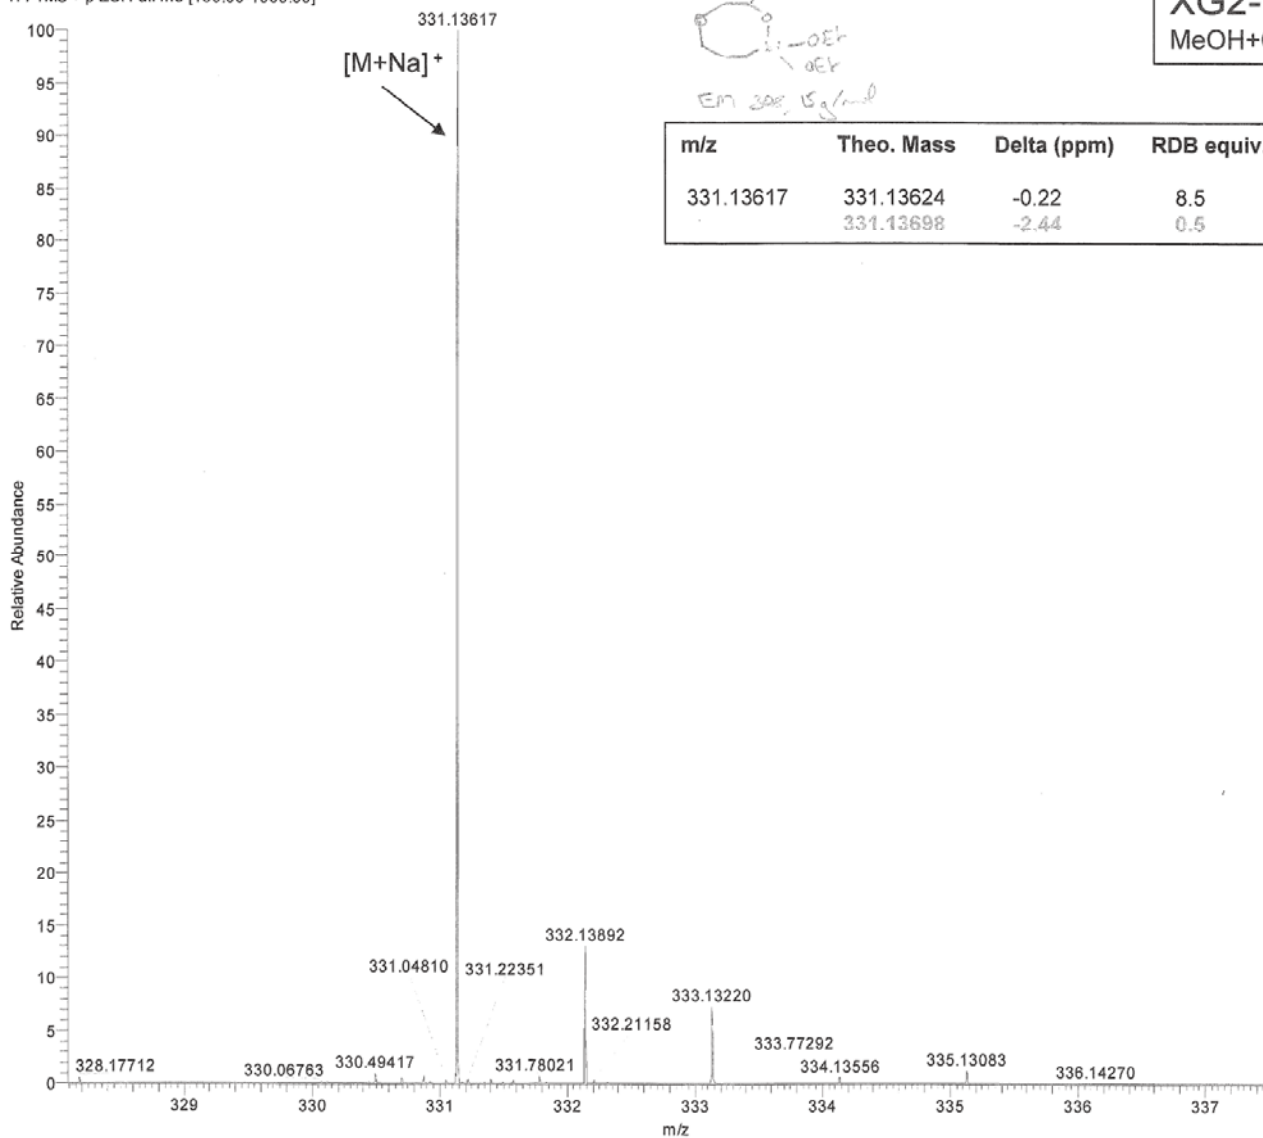

Figure SI\_63: HRMS spectrum of compound 10

SI\_64

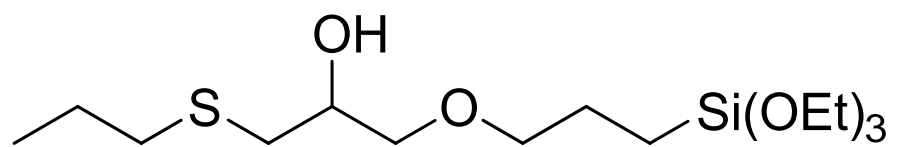

**11**

# SI\_65

XG2-145F2 1H CDC13

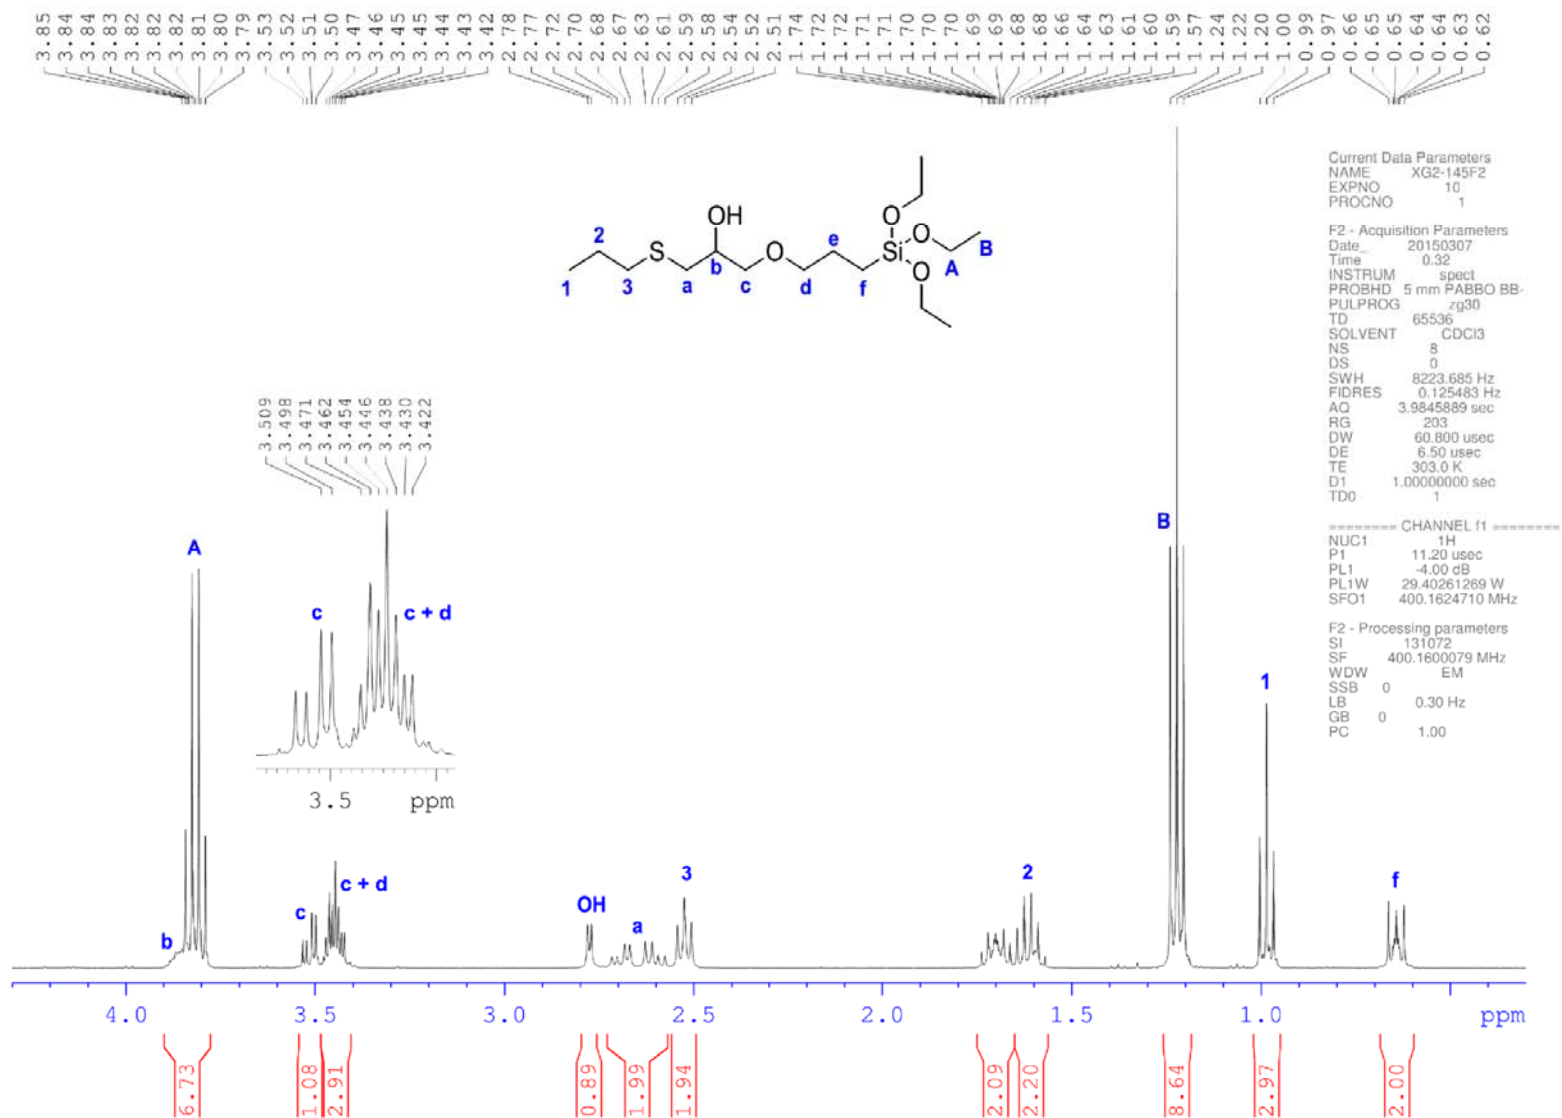

Figure SI\_65: <sup>1</sup>H NMR spectrum of compound 11

# SI\_66

XG2-145F2 13C CDC13

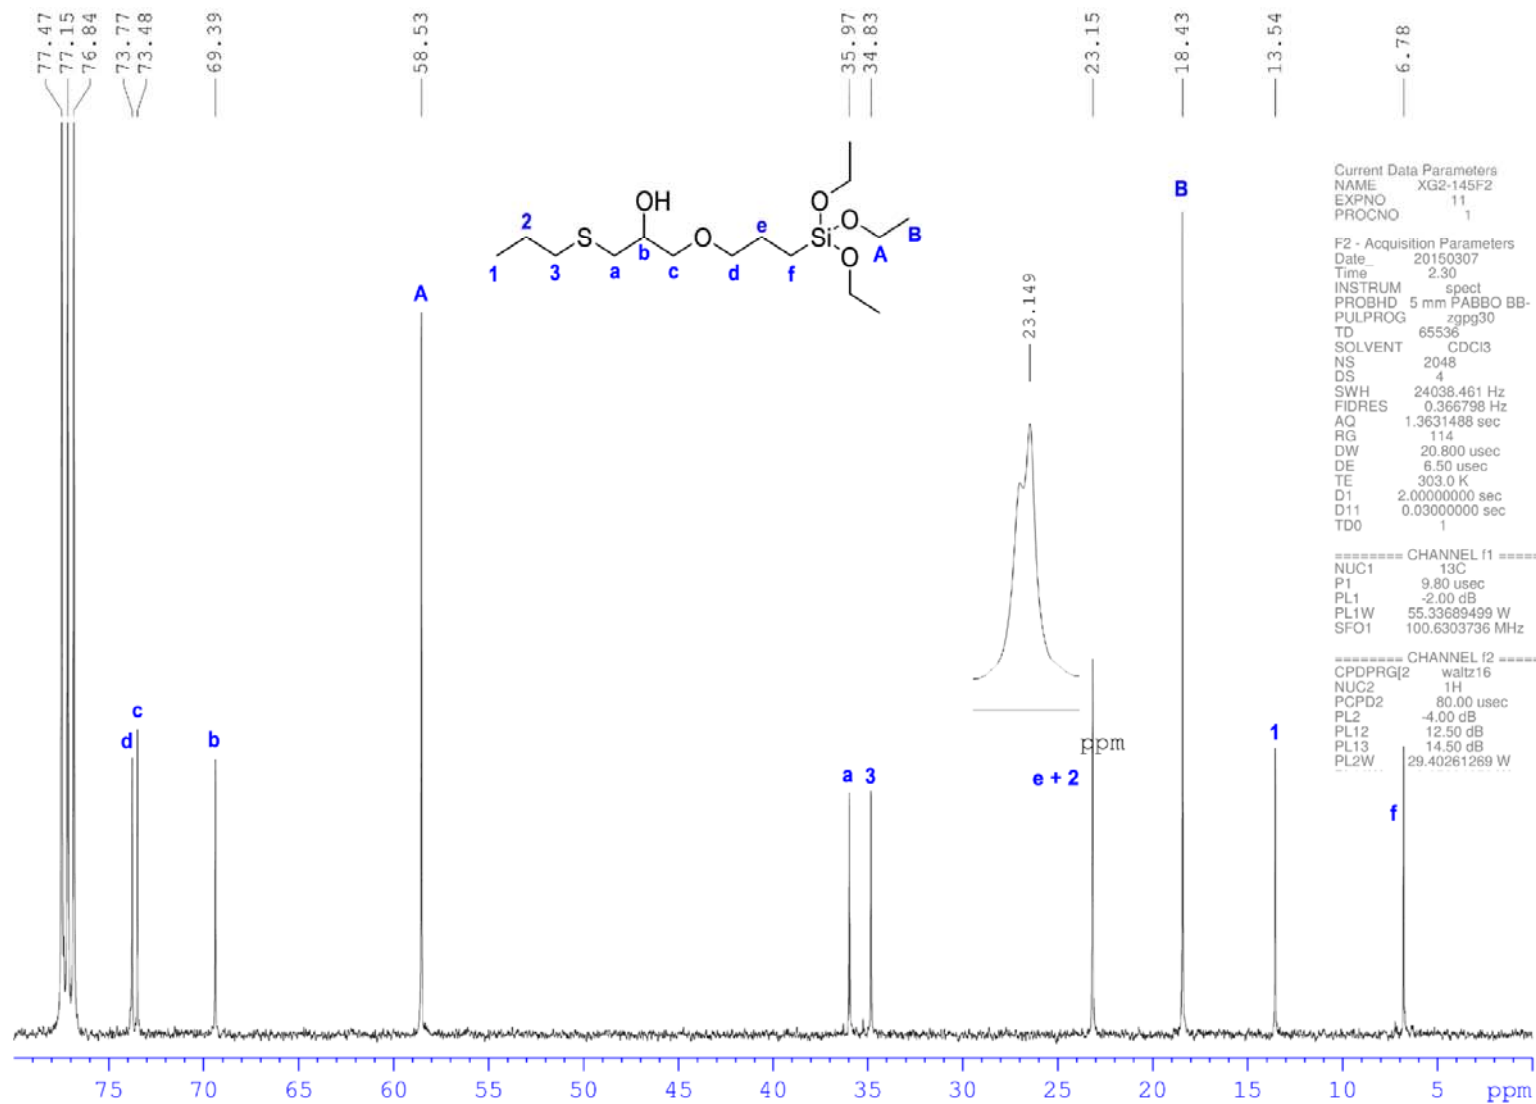

Figure SI\_66: <sup>13</sup>C NMR spectrum of compound 11

# SI\_67

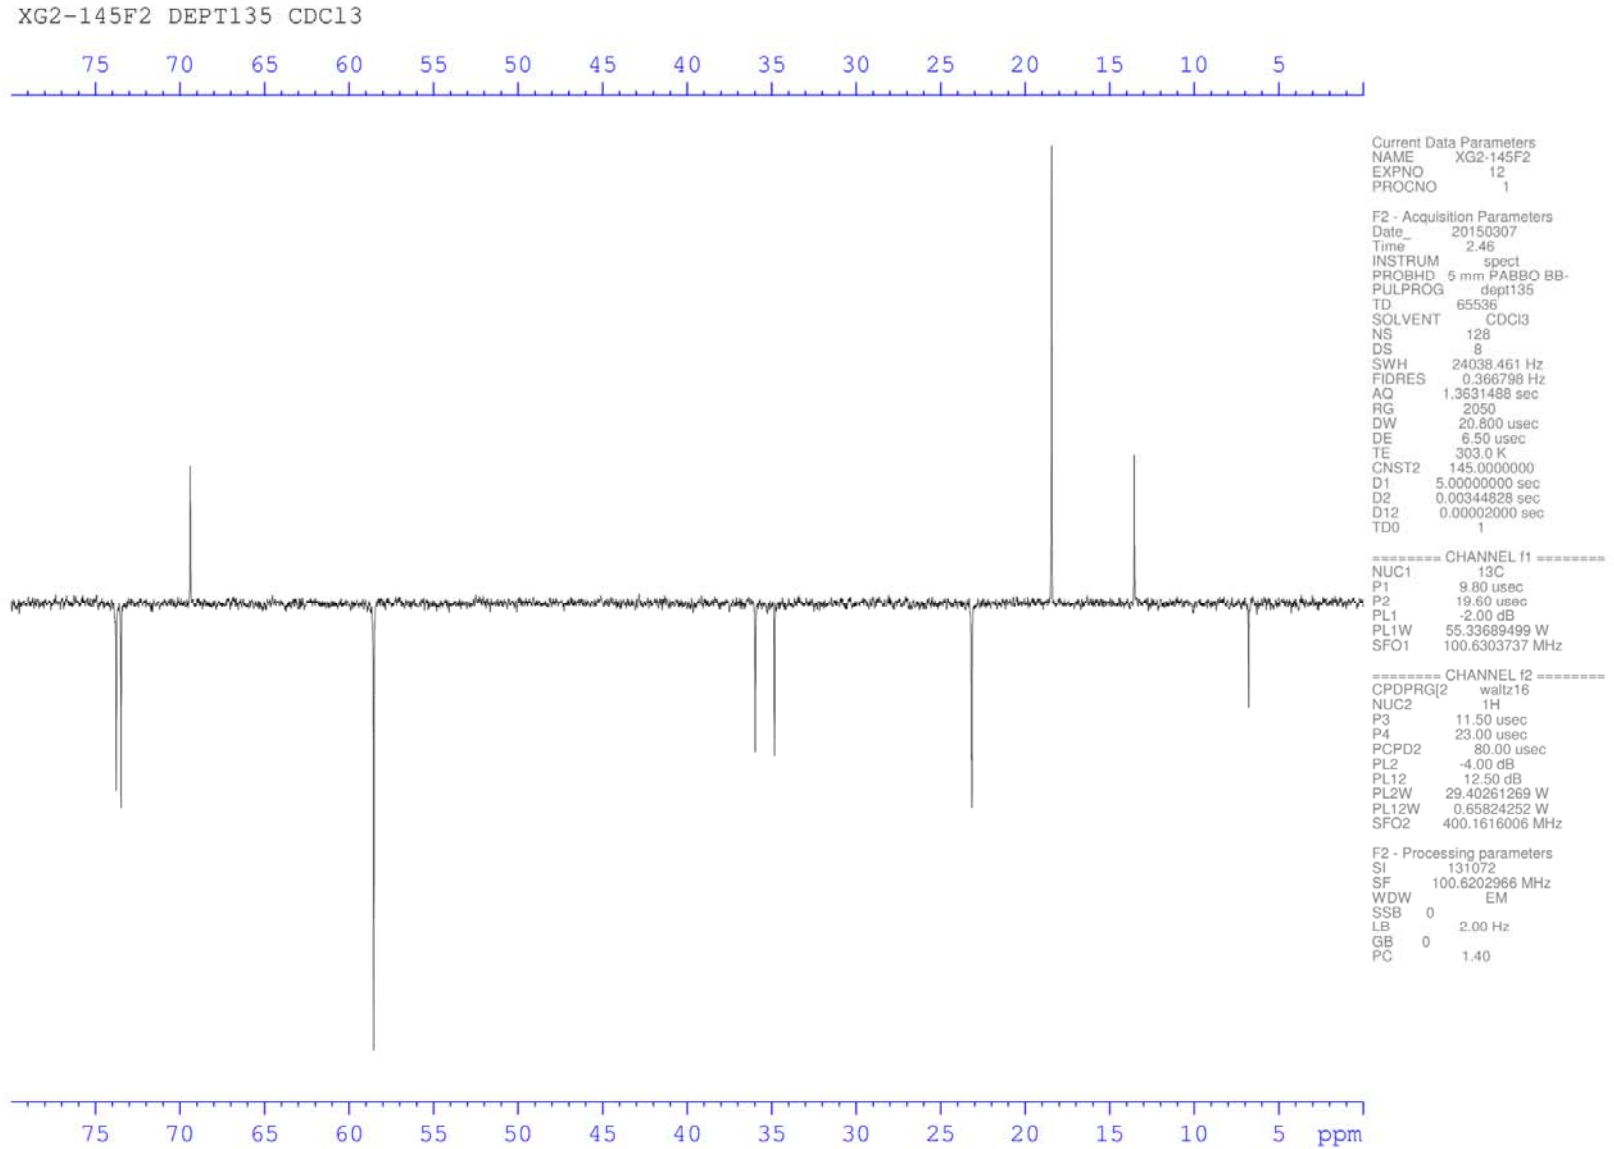

Figure SI\_67: DEPT 135 spectrum of compound 11

# SI\_68

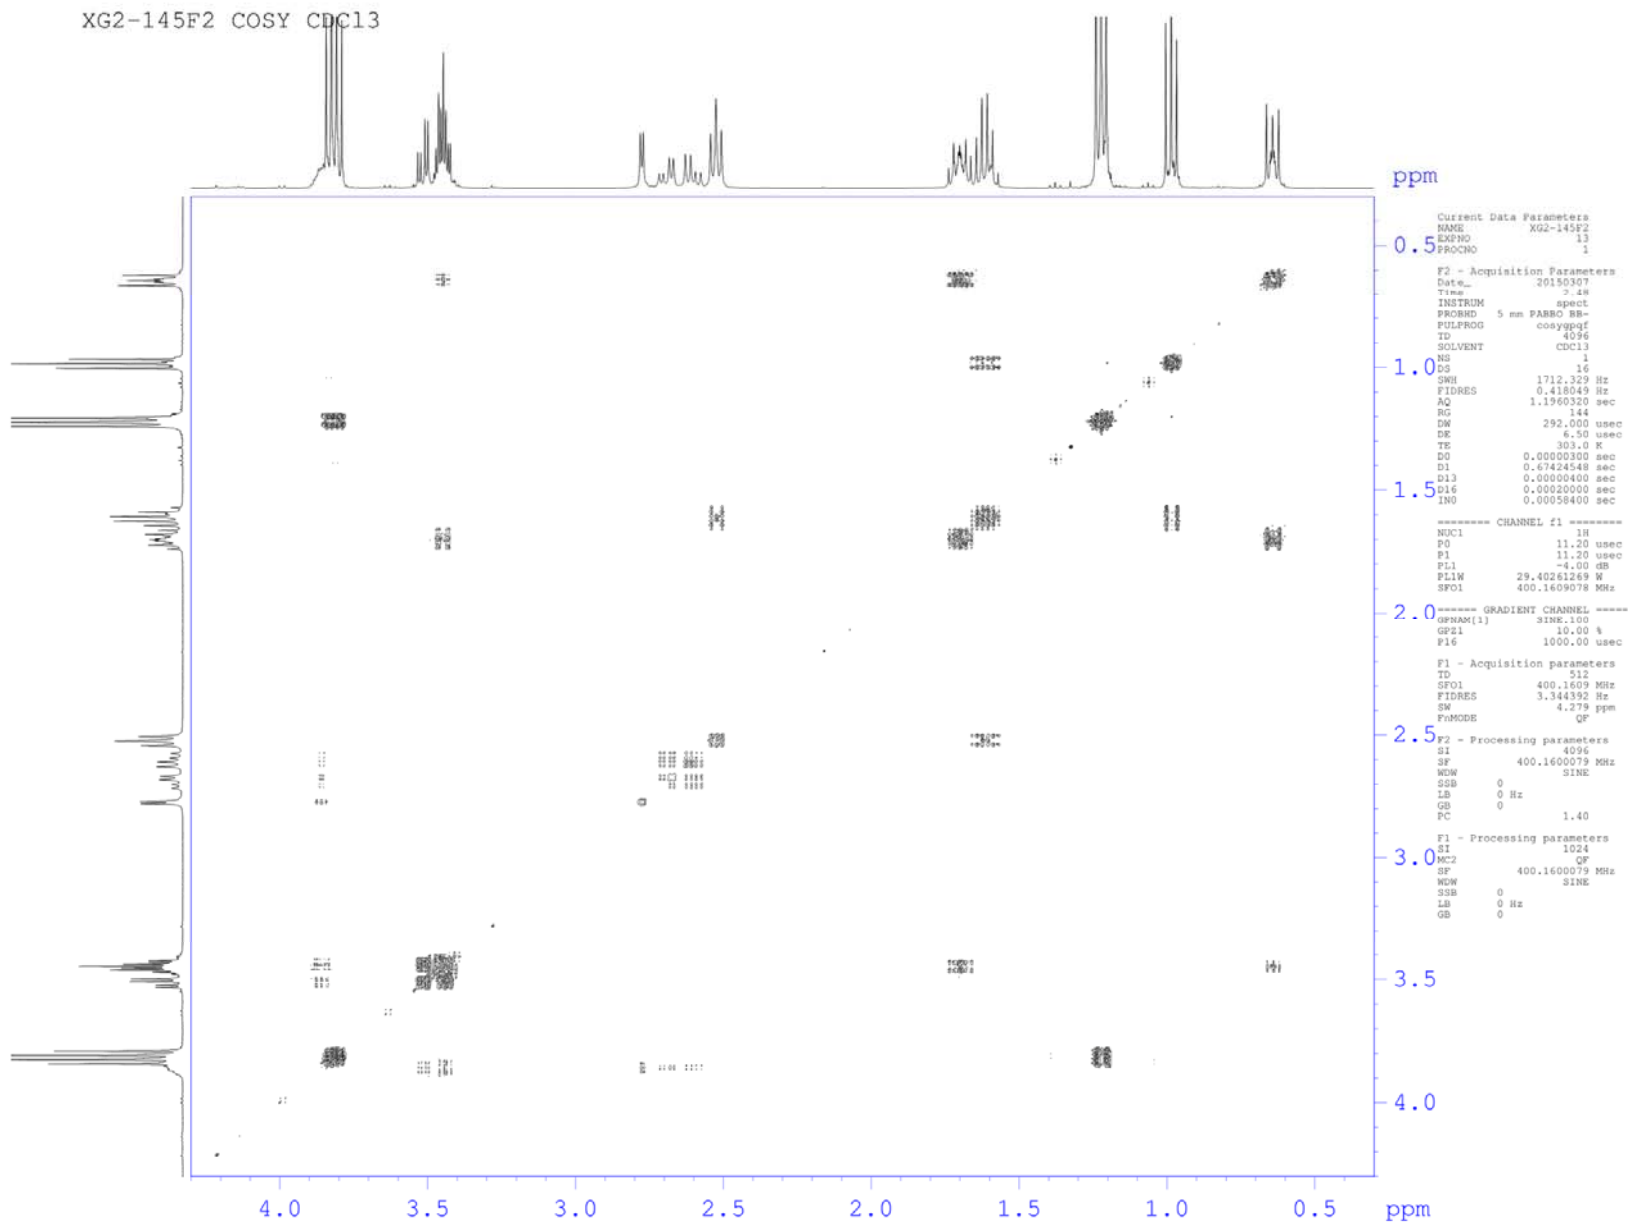

Figure SI\_68:  $^1\text{H}$   $^1\text{H}$  COSY spectrum of compound 11



# SI\_69

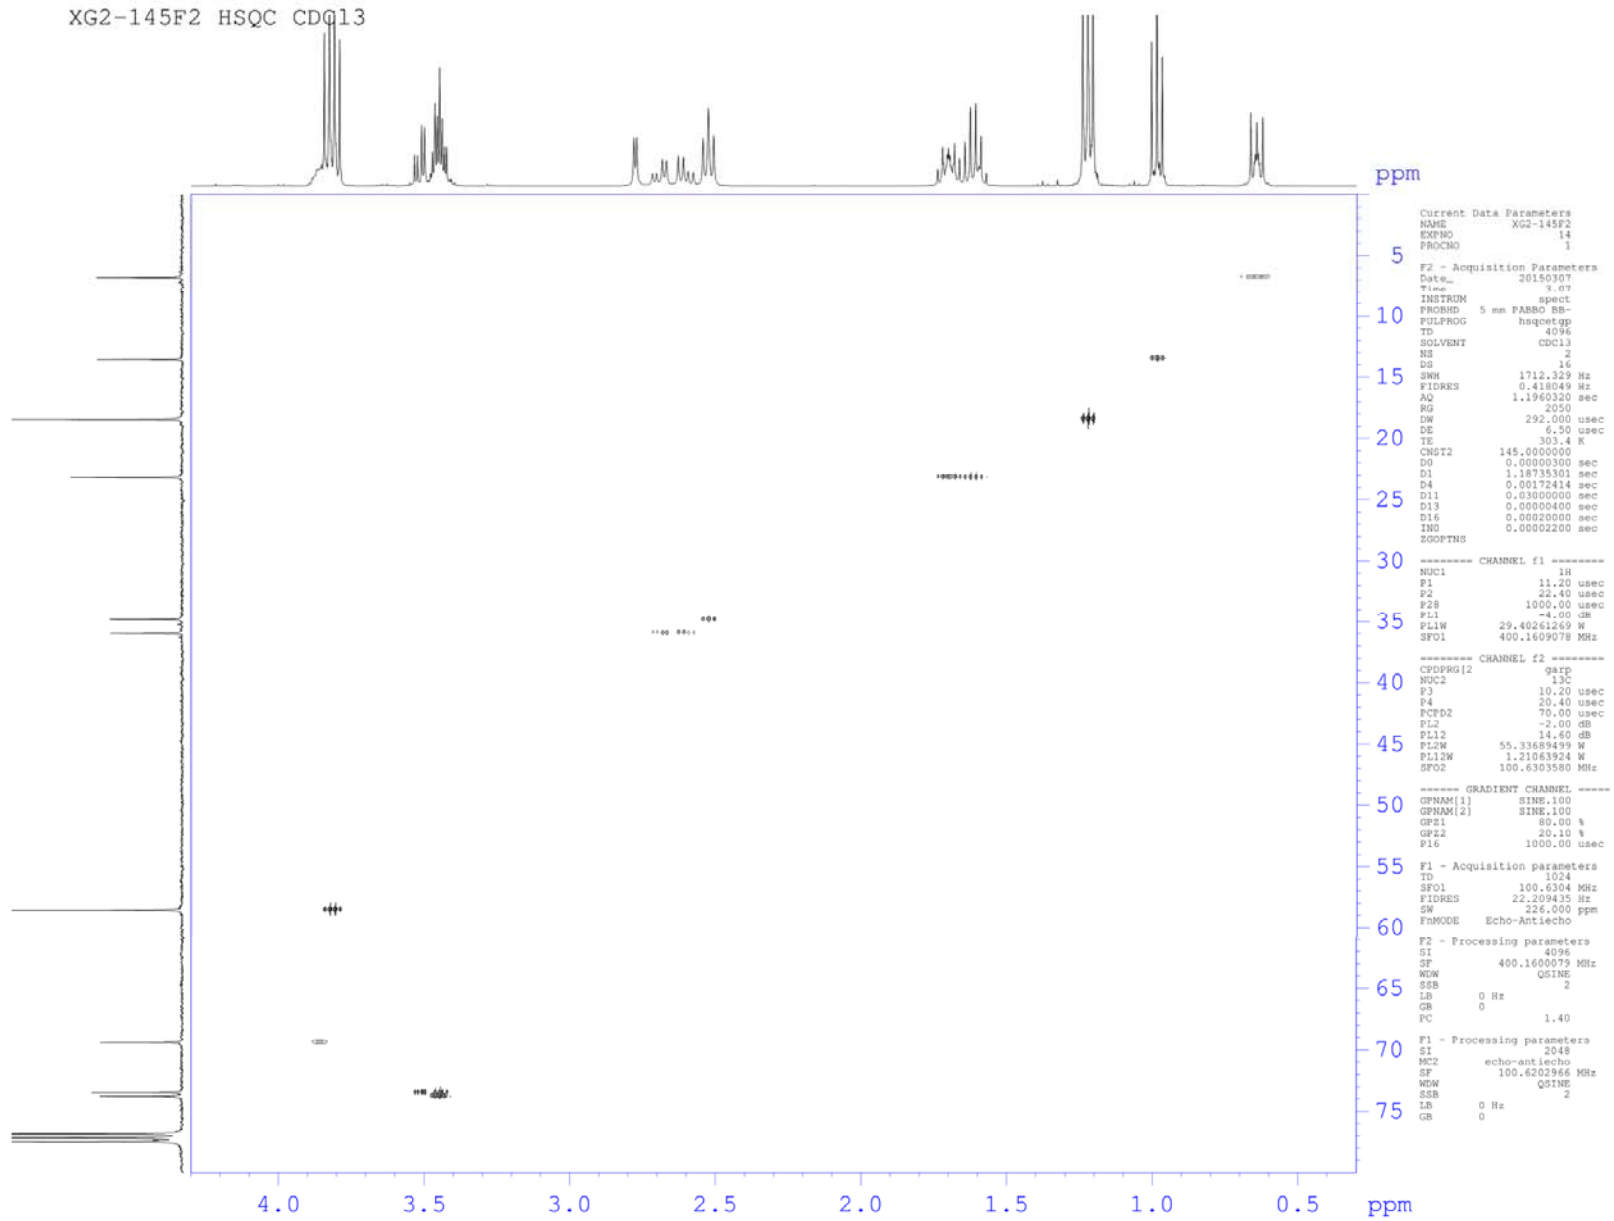

Figure SI\_69: HSQC spectrum of compound 11

# SI\_70

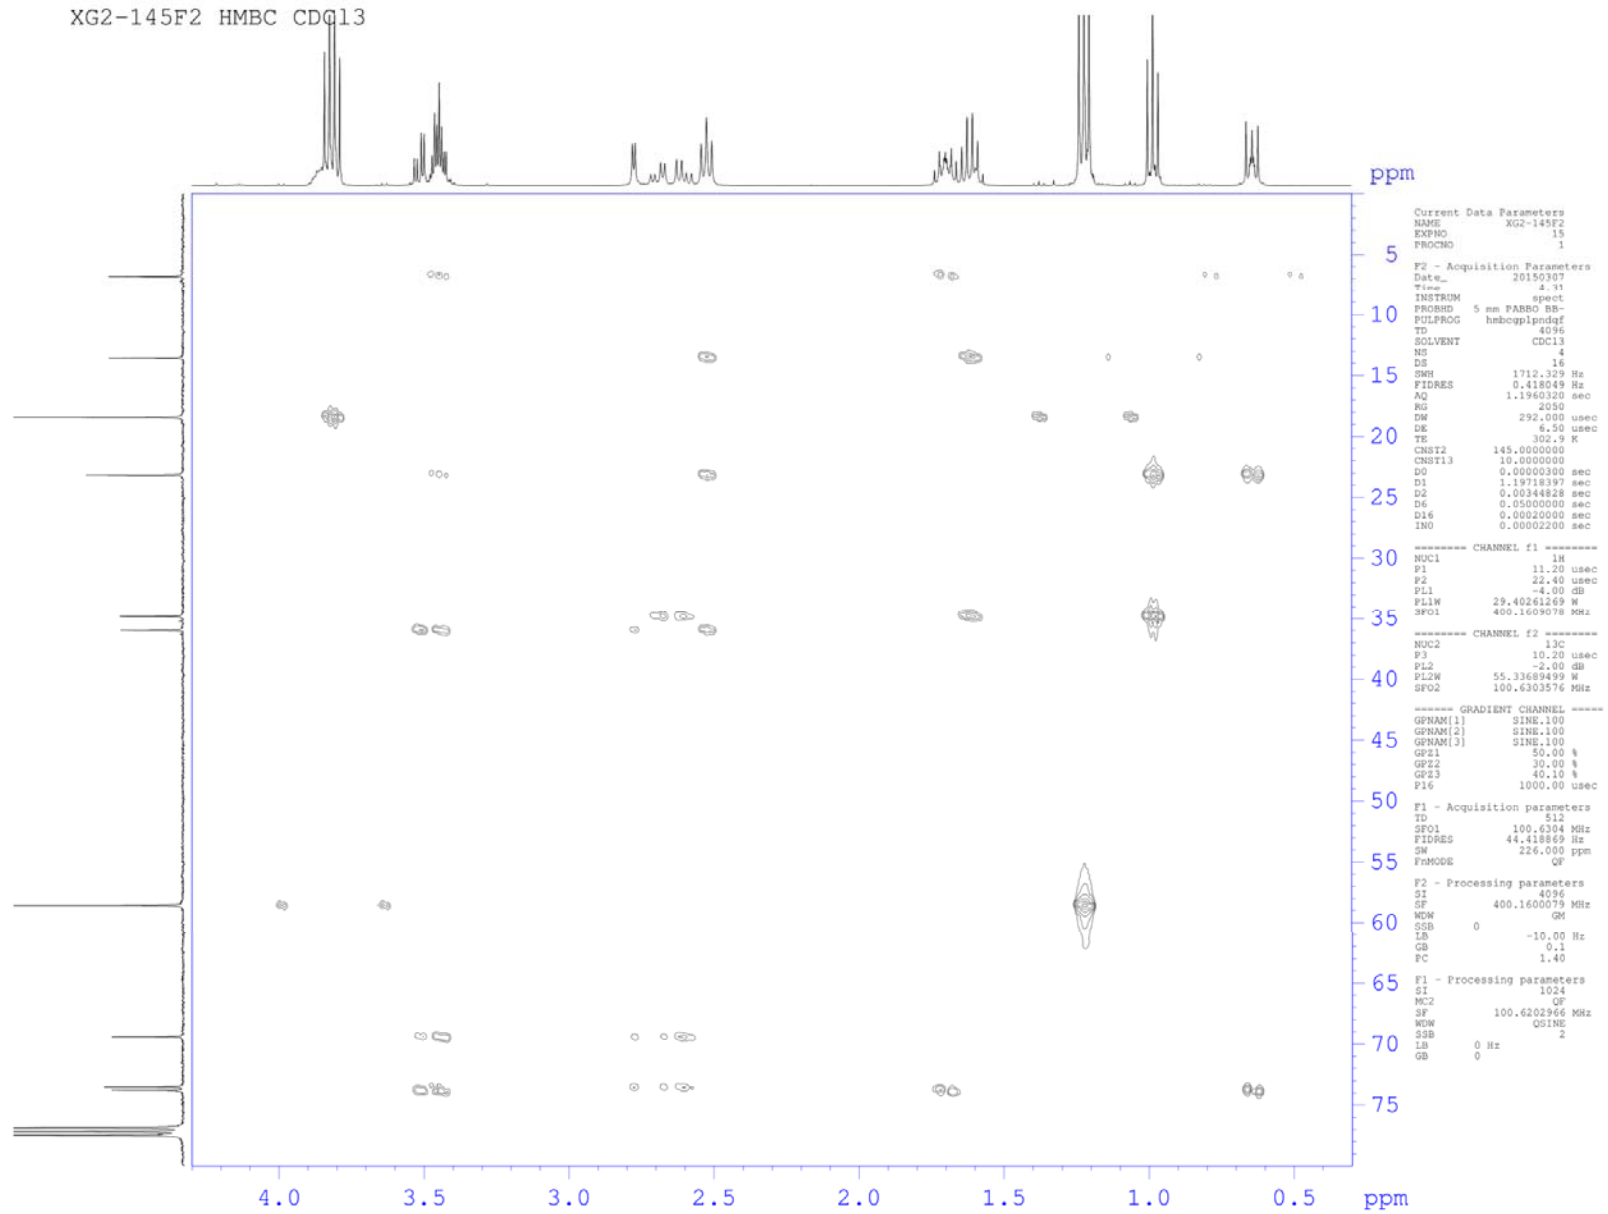

Figure SI\_70: HMBC spectrum of compound 11

# SI\_71

20150323\_XG2-145F2 #20 RT: 0.27 AV: 1 NL: 1.74E6  
T: FTMS + p ESI Full ms [150.00-1000.00]

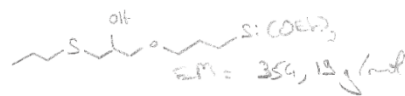

**XG2-145F2 – ESI+**  
MeOH+CH<sub>2</sub>Cl<sub>2</sub>

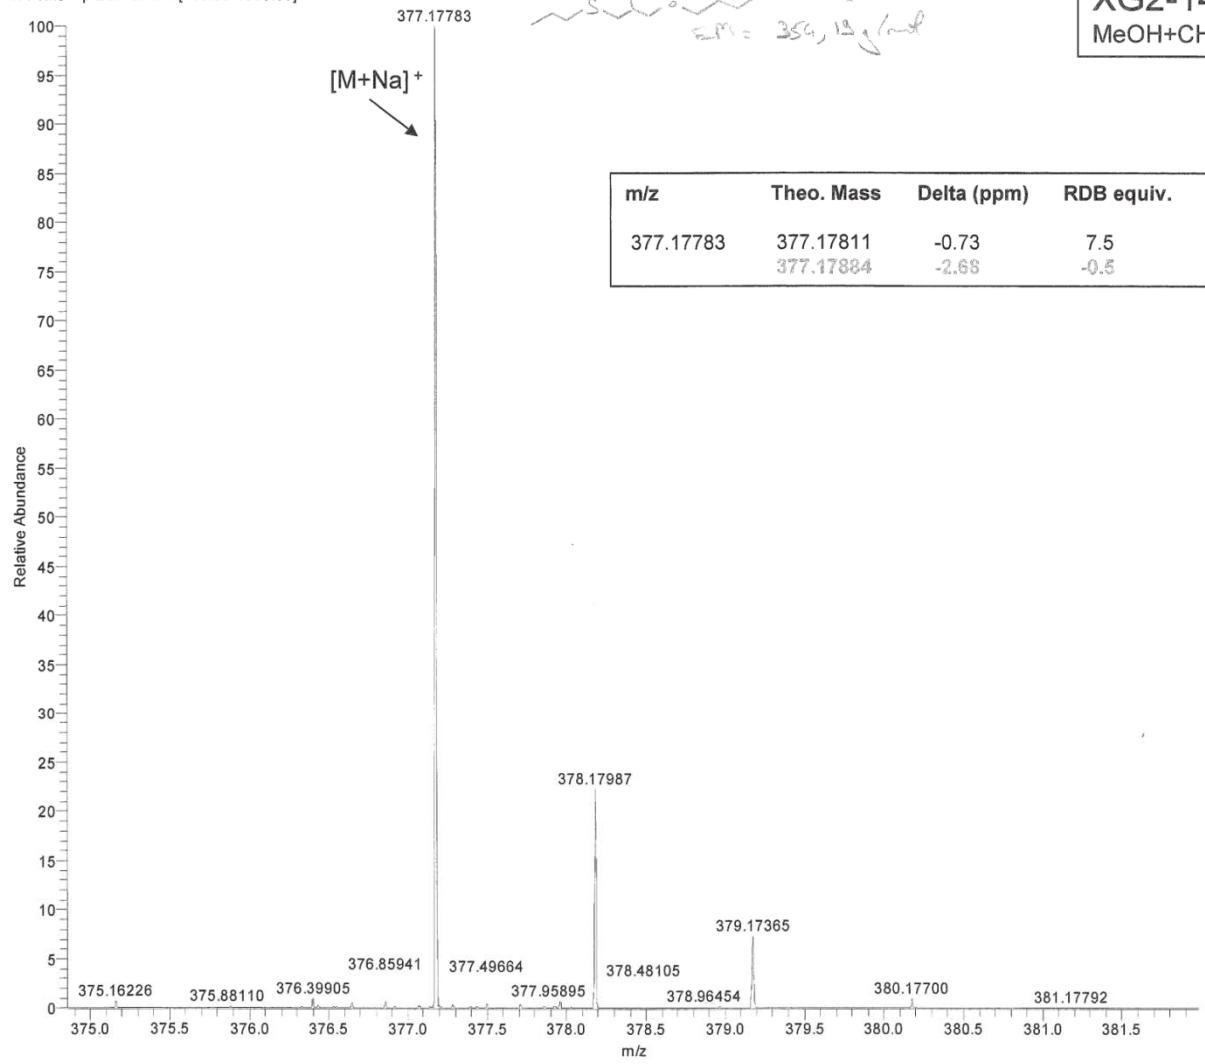

| m/z       | Theo. Mass | Delta (ppm) | RDB equiv. | Composition                                            |
|-----------|------------|-------------|------------|--------------------------------------------------------|
| 377.17783 | 377.17811  | -0.73       | 7.5        | C <sub>21</sub> H <sub>29</sub> O <sub>4</sub> S       |
|           | 377.17884  | -2.68       | -0.5       | C <sub>15</sub> H <sub>34</sub> O <sub>5</sub> Na S Si |

Figure SI\_71: HRMS spectrum of compound 11

SI\_72

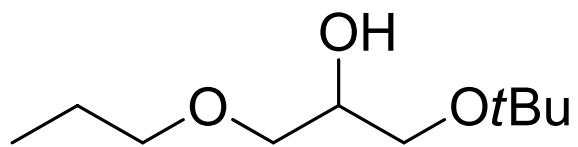

**12a**

# SI\_73

XG2-118F1 1H CDCl3

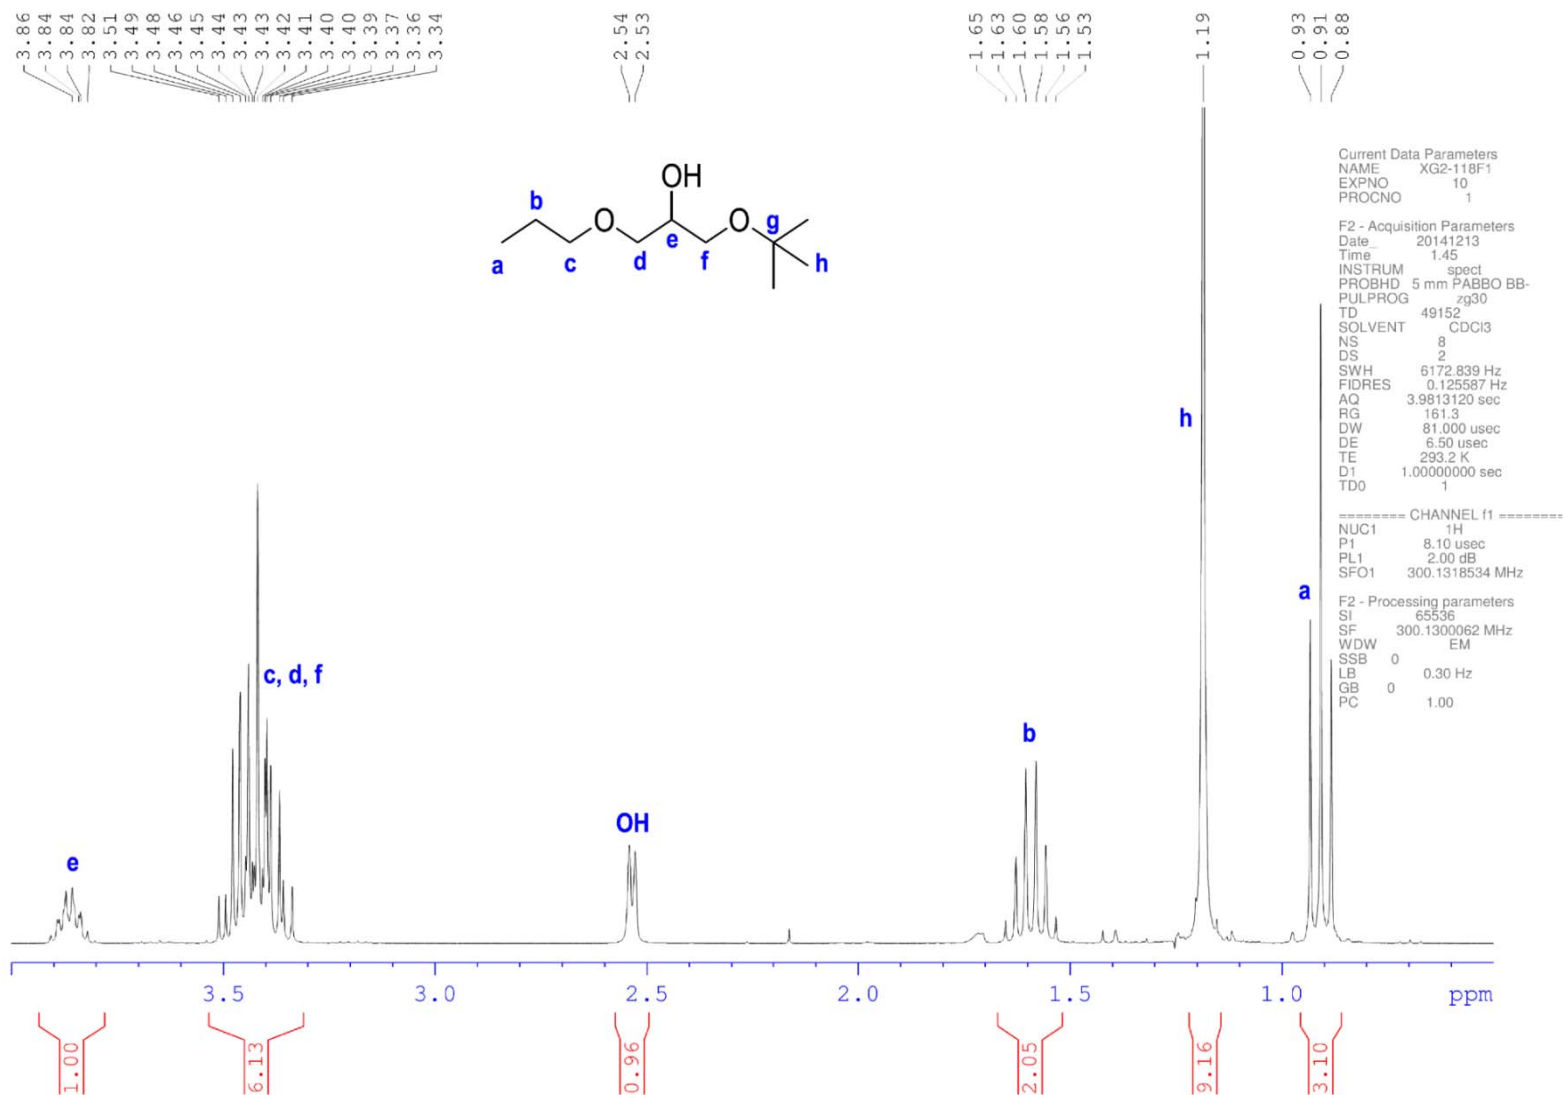

Figure SI\_73: <sup>1</sup>H NMR spectrum of compound 12a

# SI\_74

XG2-118F1 13C CDC13

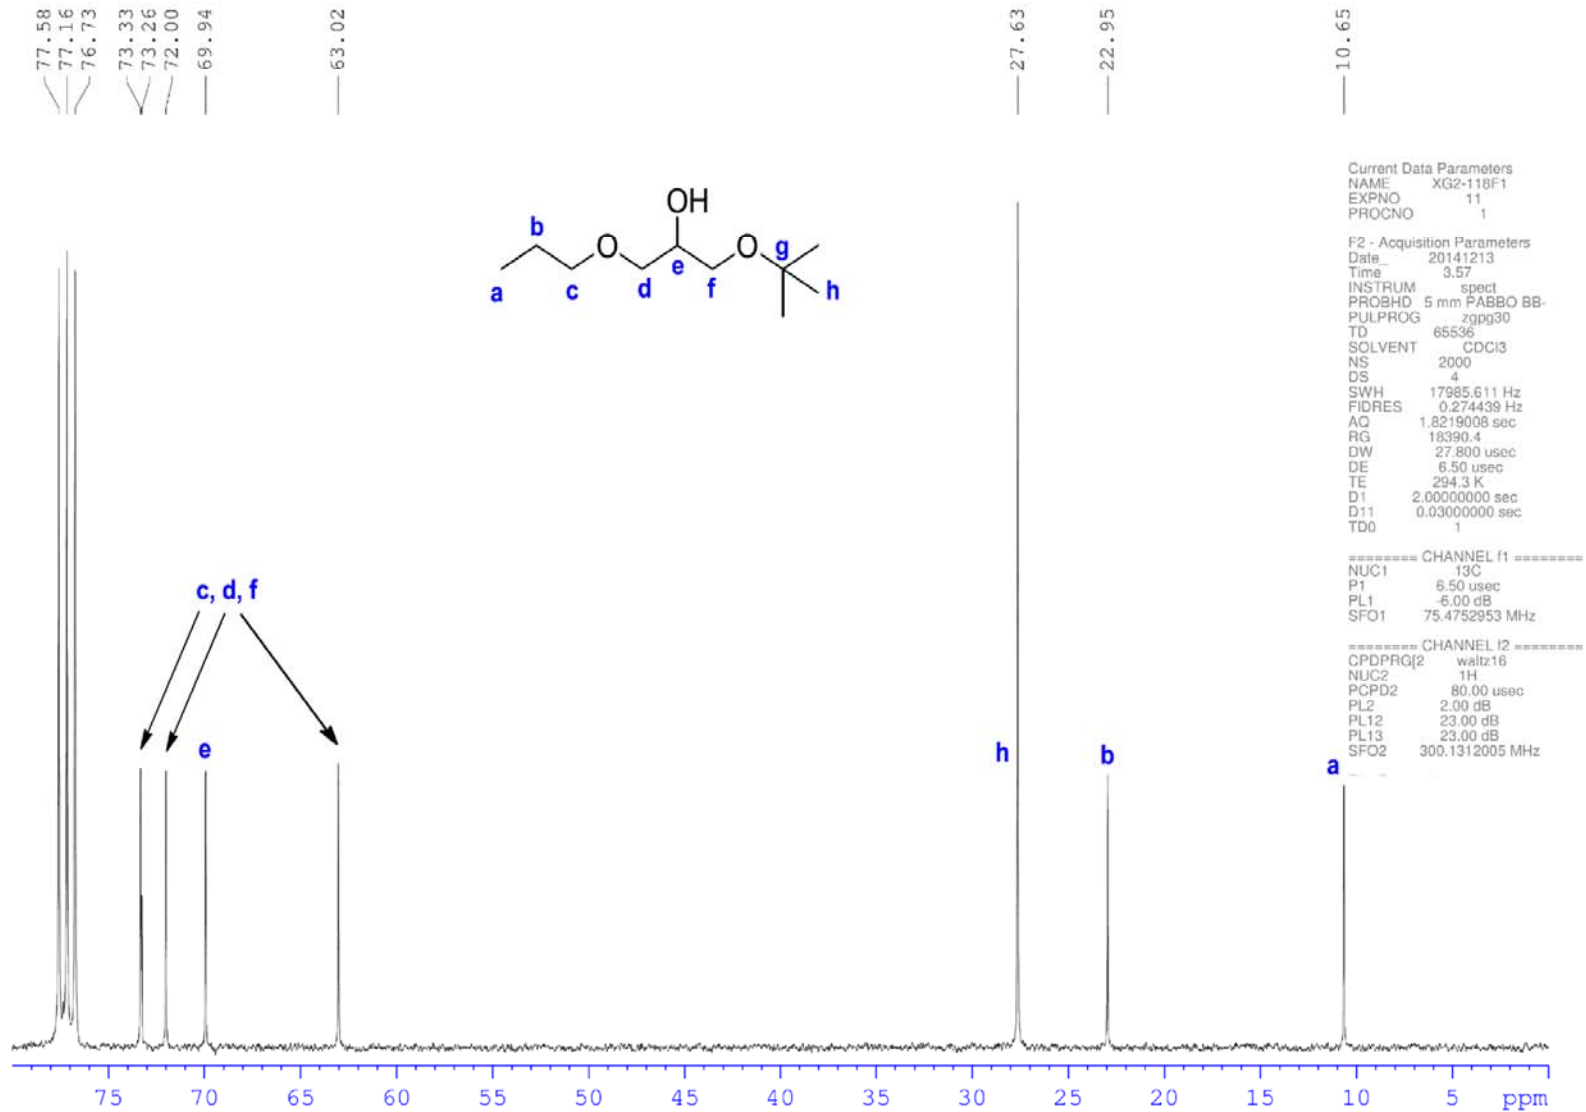

Figure SI\_74: <sup>13</sup>C NMR spectrum of compound 12a

# SI\_75

XG2-118F1 DEPT135 CDC13

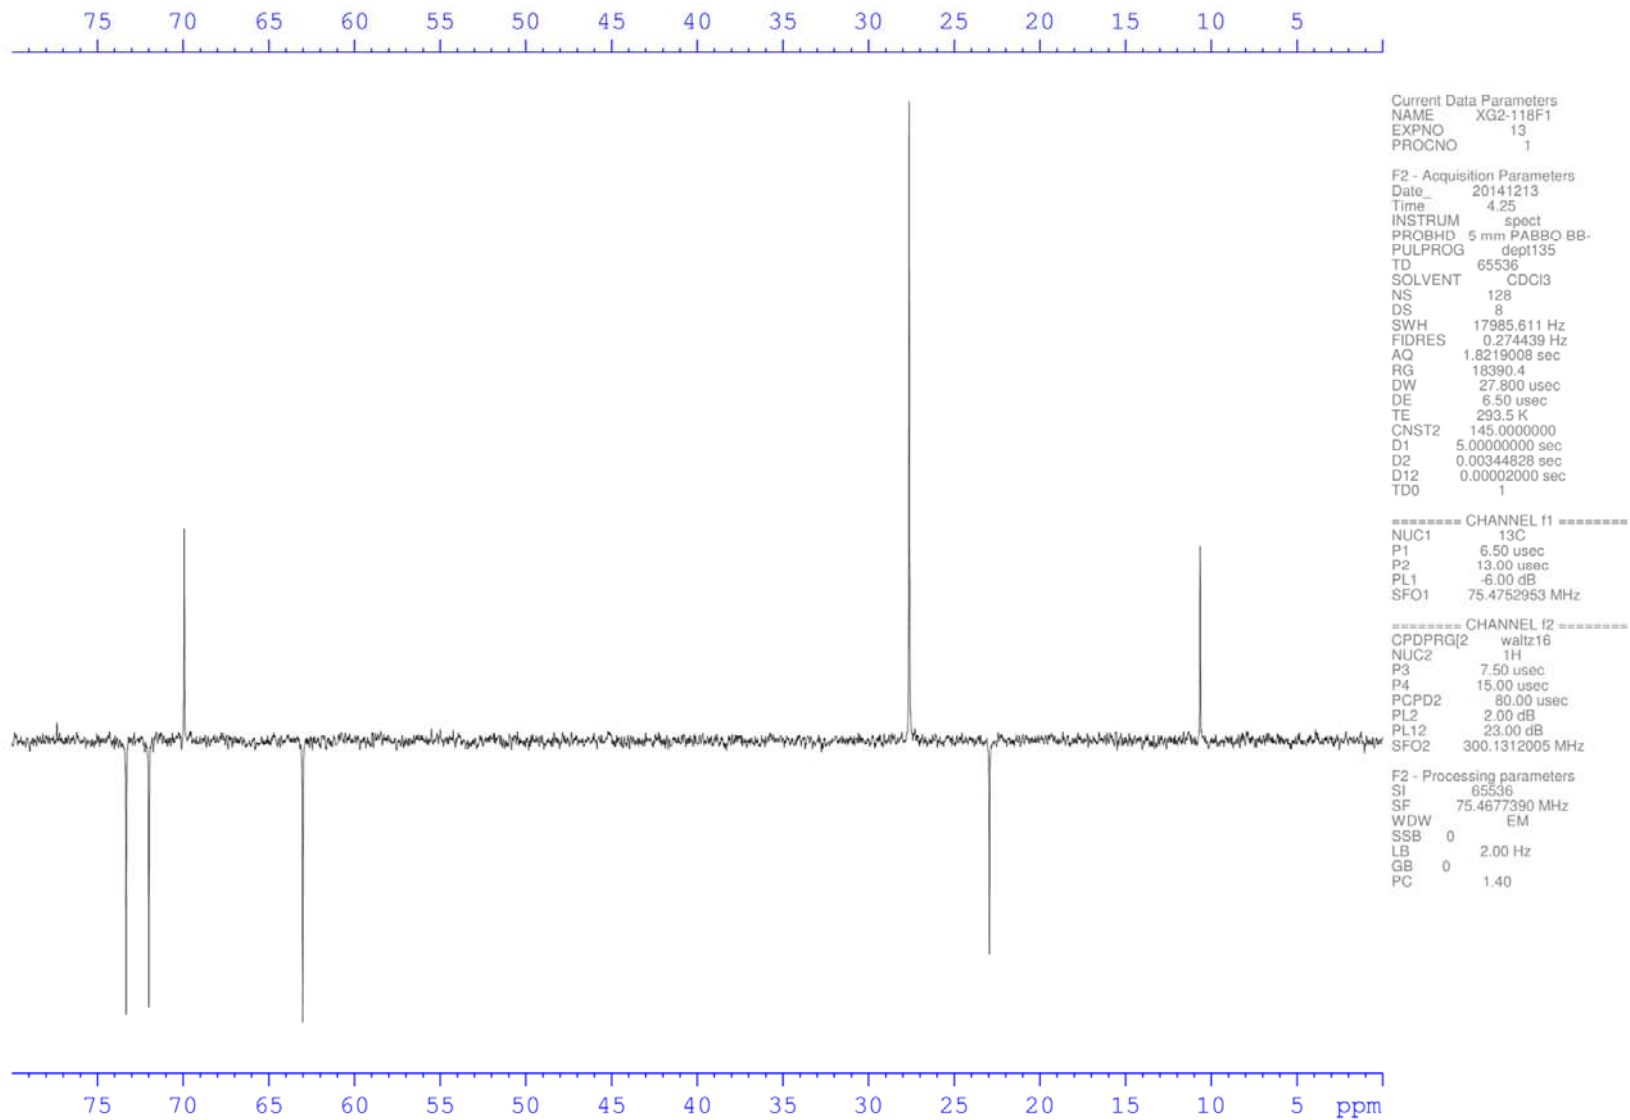

Figure SI\_75: DEPT 135 NMR spectrum of compound 12a

# SI\_76

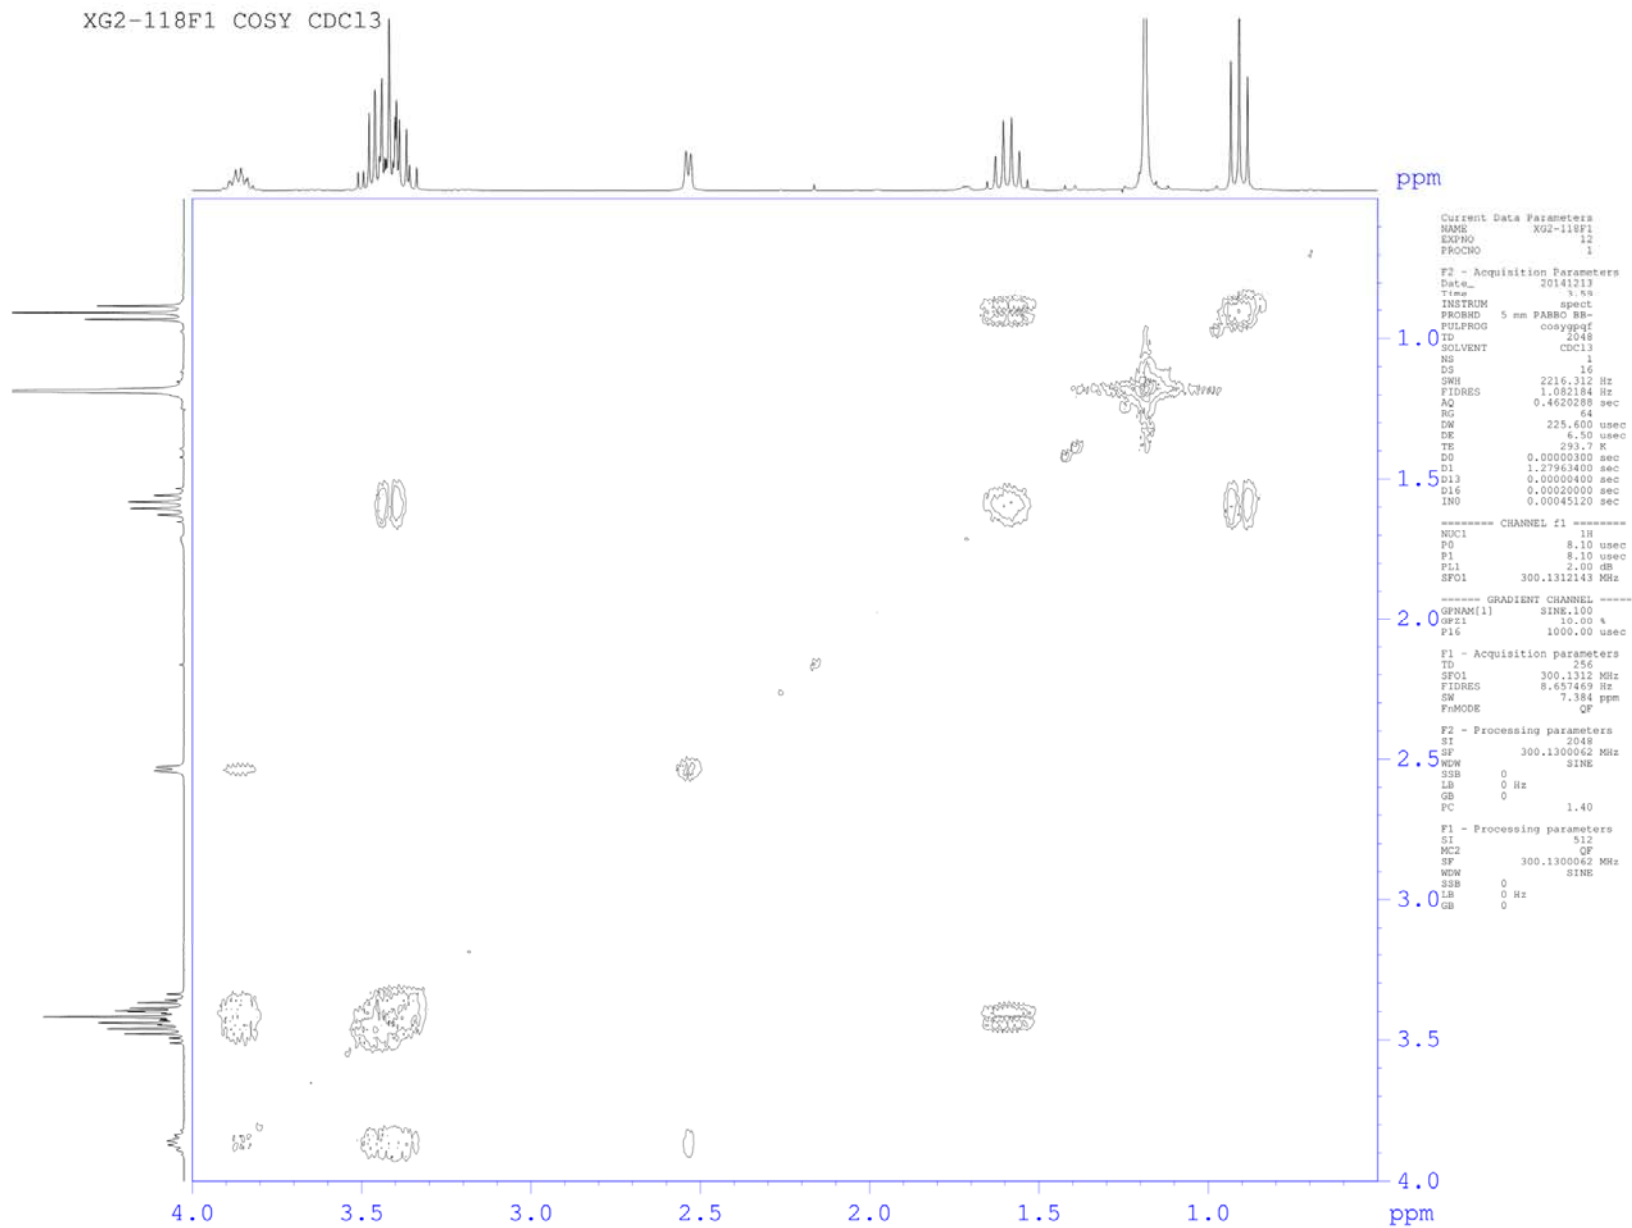

Figure SI\_76: H-1H COSY NMR spectrum of compound 12a



# SI\_77

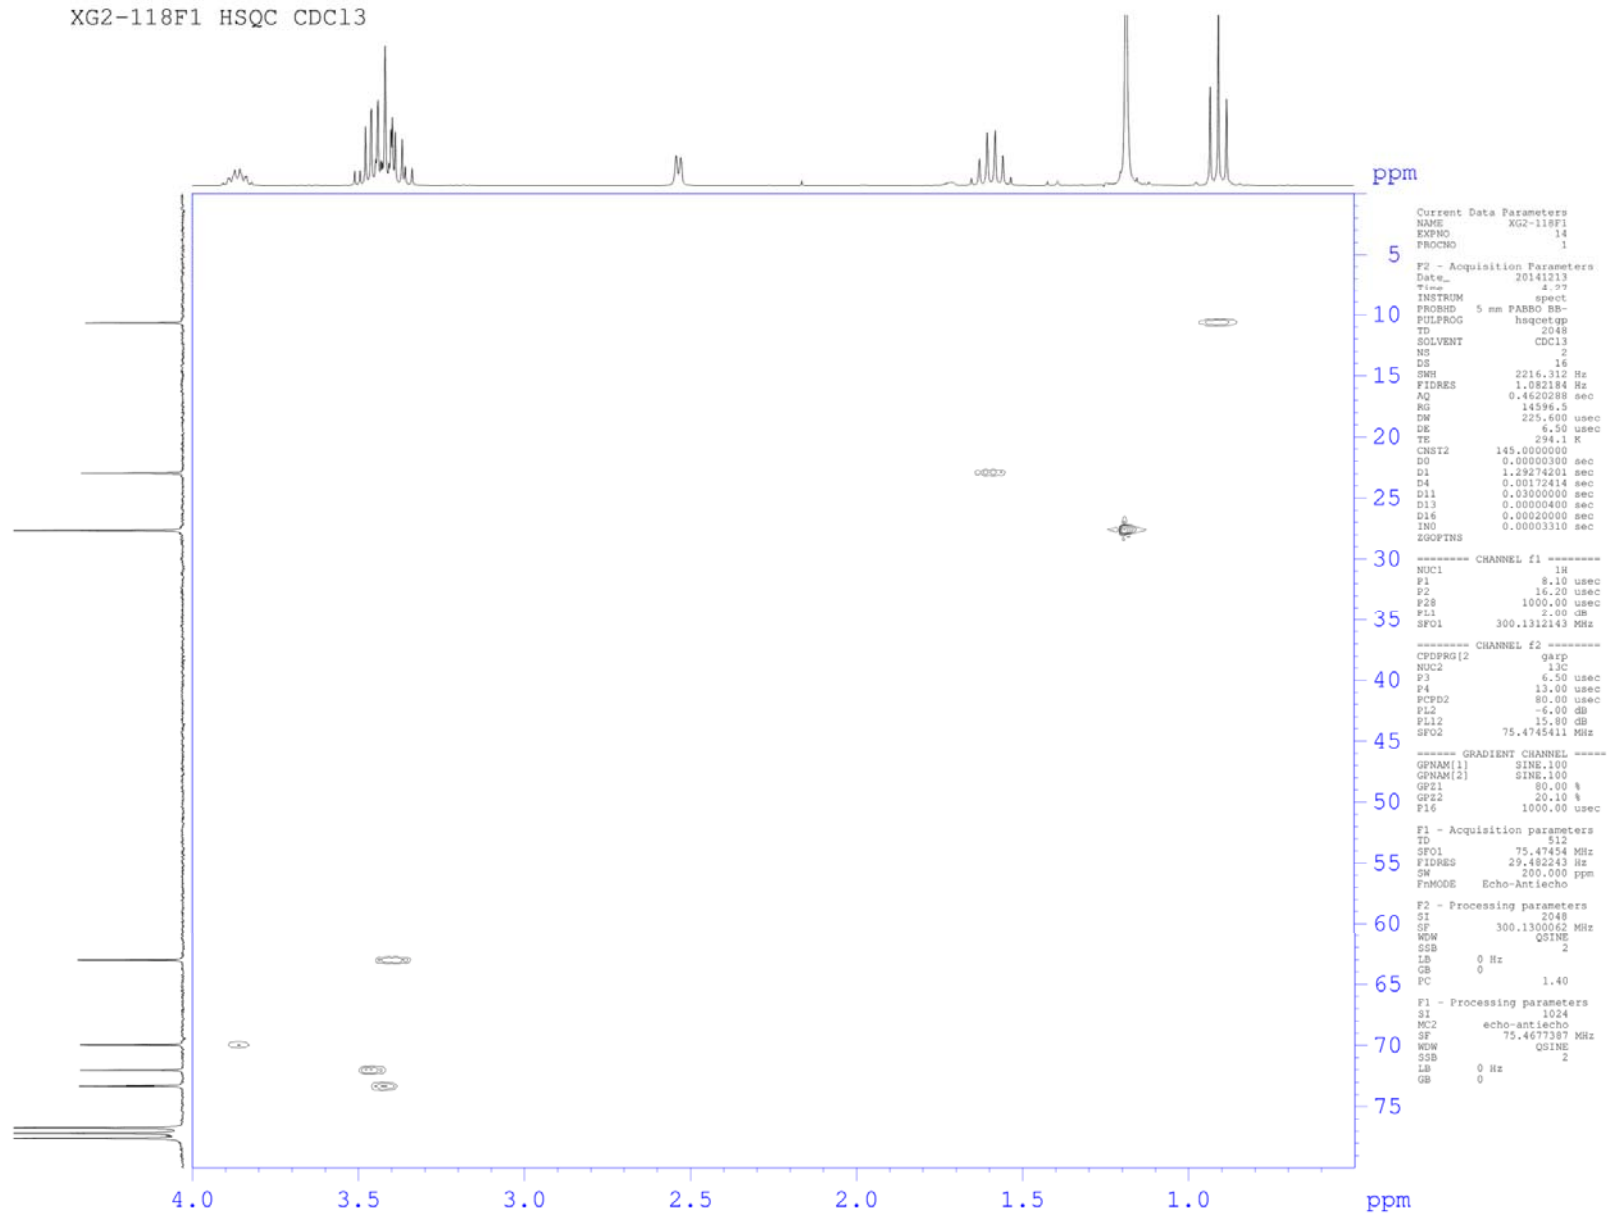

Figure SI\_77: HSQC spectrum of compound 12a

# SI\_78

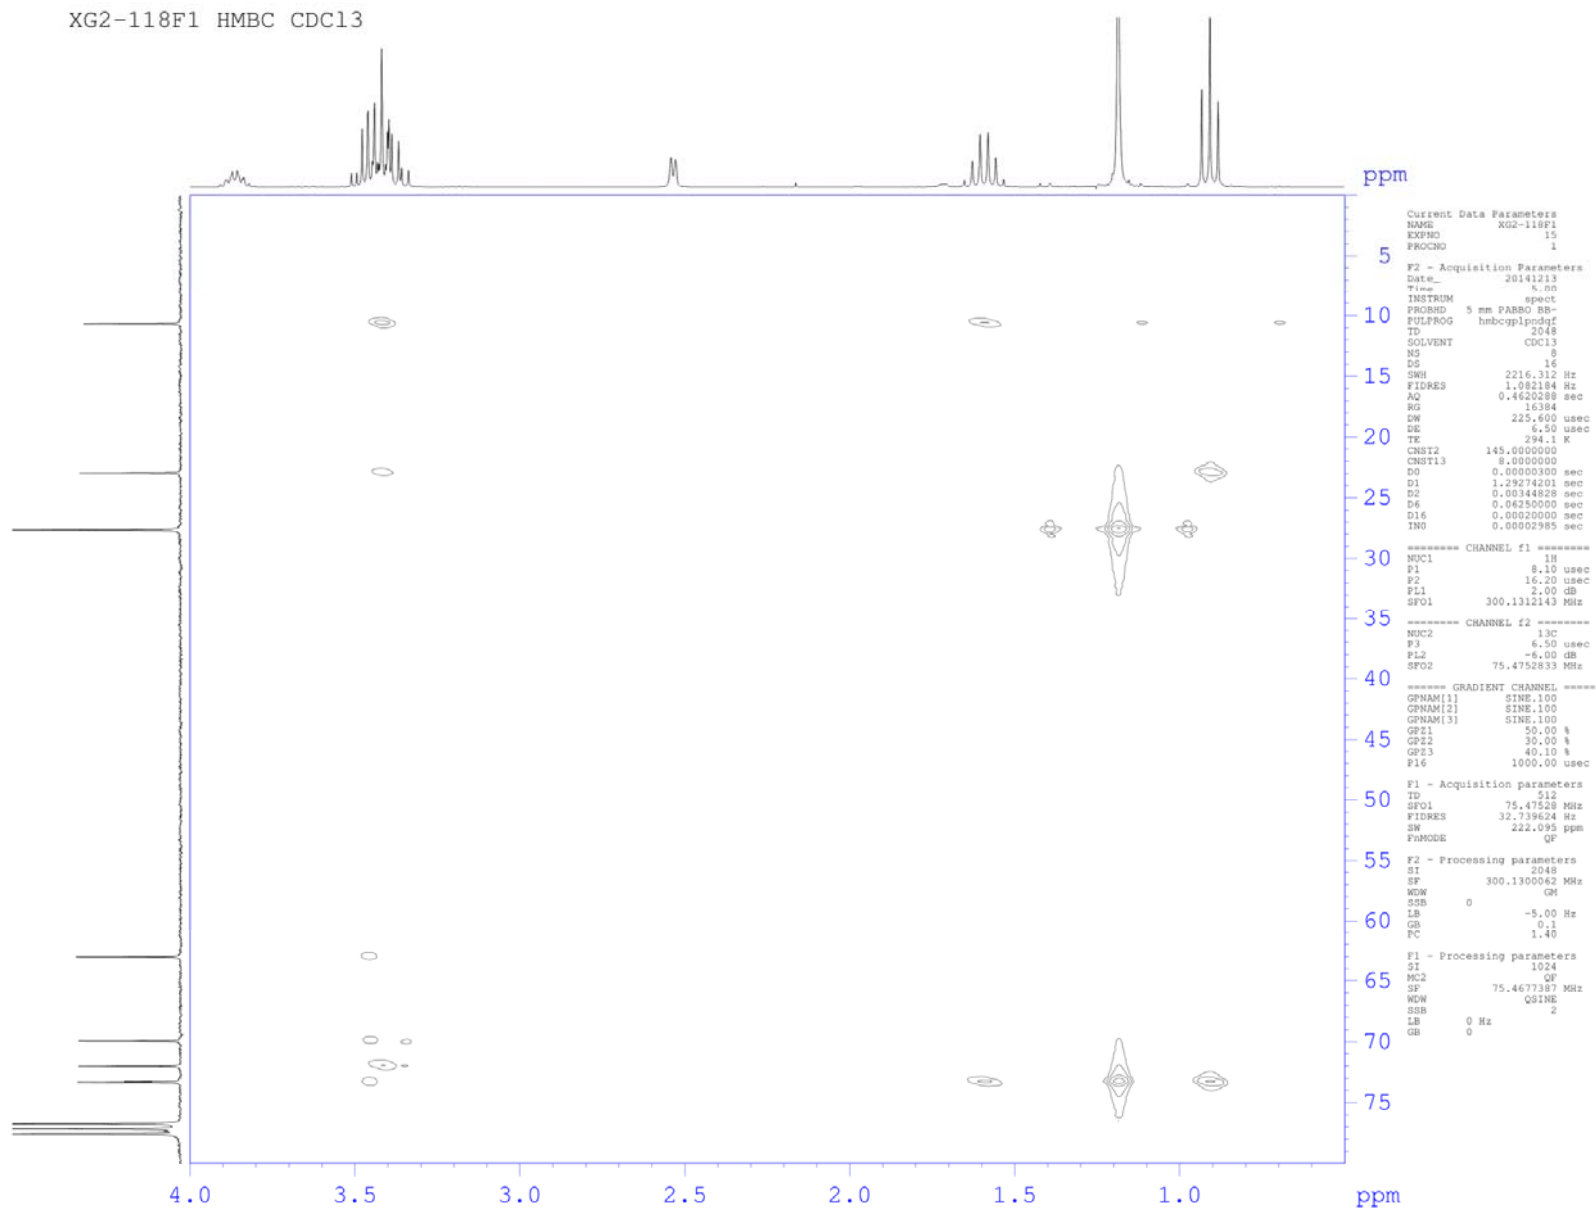

Figure SI\_78: HMBC spectrum of compound 12a

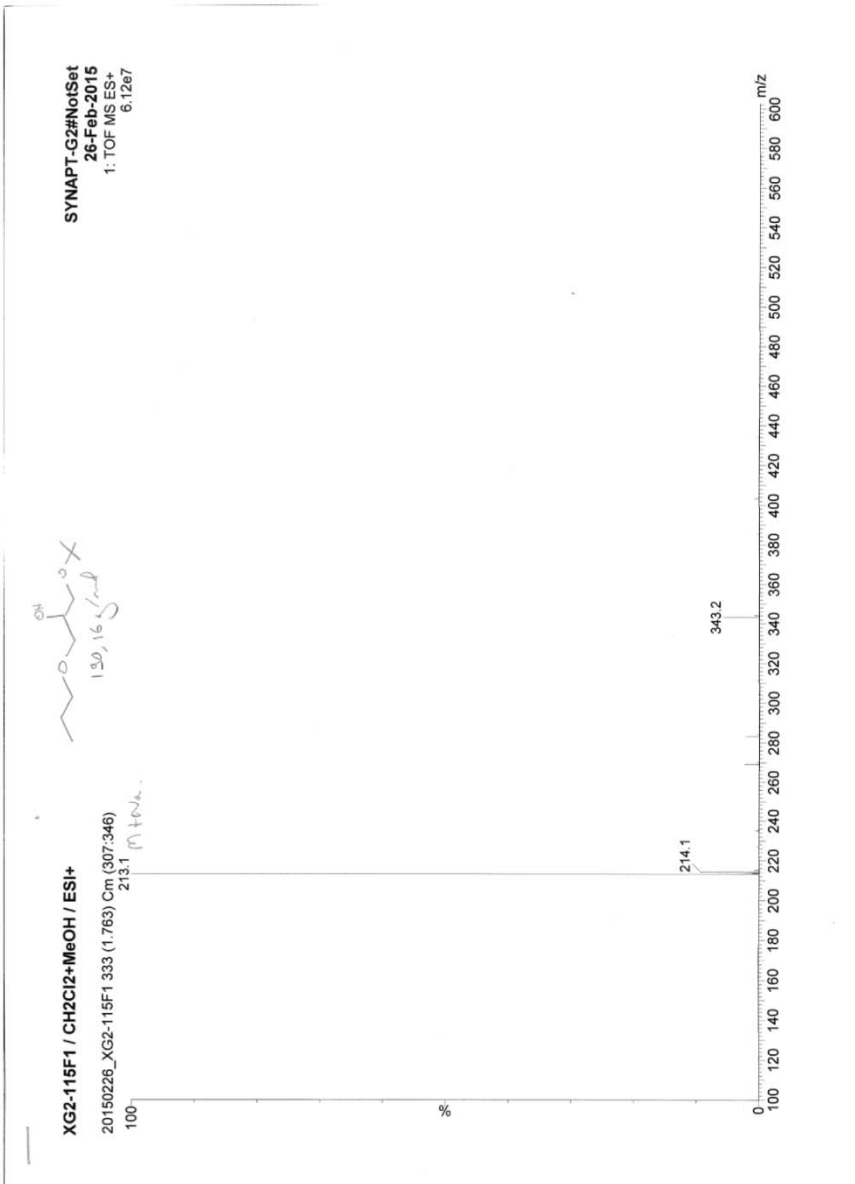

Elemental Composition Report

**Single Mass Analysis**  
 Tolerance = 5.0 PPM / DBE: min = -1.5, max = 100.0  
 Element prediction: Off  
 Number of isotope peaks used for i-FIT = 4

Monoisotopic Mass: Even Electron Ions  
 17 formula(e) evaluated with 1 results within limits (up to 50 closest results for each mass)

Elements Used:  
 C: 0-70 H: 0-120 O: 0-6 Na: 1-1

20150226\_XG2-115F1\_333 (1.763) AM2 (Av: 20000.0, 0.00, 0.00); Cm (307.346)  
 XG2-115F1 / CH2Cl2+MeOH / ESI+  
 1.31e+008

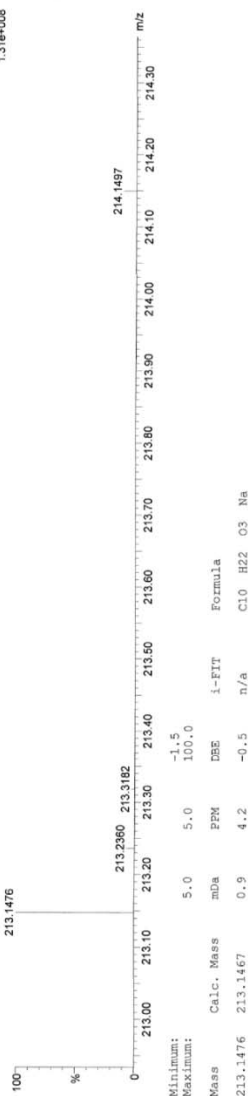

| Mass     | Calc. Mass | mDa | PPM | DBE  | i-FIT | Formula       |
|----------|------------|-----|-----|------|-------|---------------|
| 213.1476 | 213.1467   | 0.9 | 4.2 | -0.5 | n/a   | C10 H22 O3 Na |

Figure SI\_79: ESI-HRMS spectrum of compound 12a

SI\_80

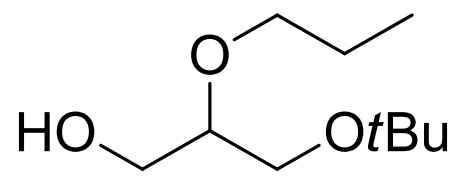

**12b**

# SI\_81

XG2-126F3 1H CDC13

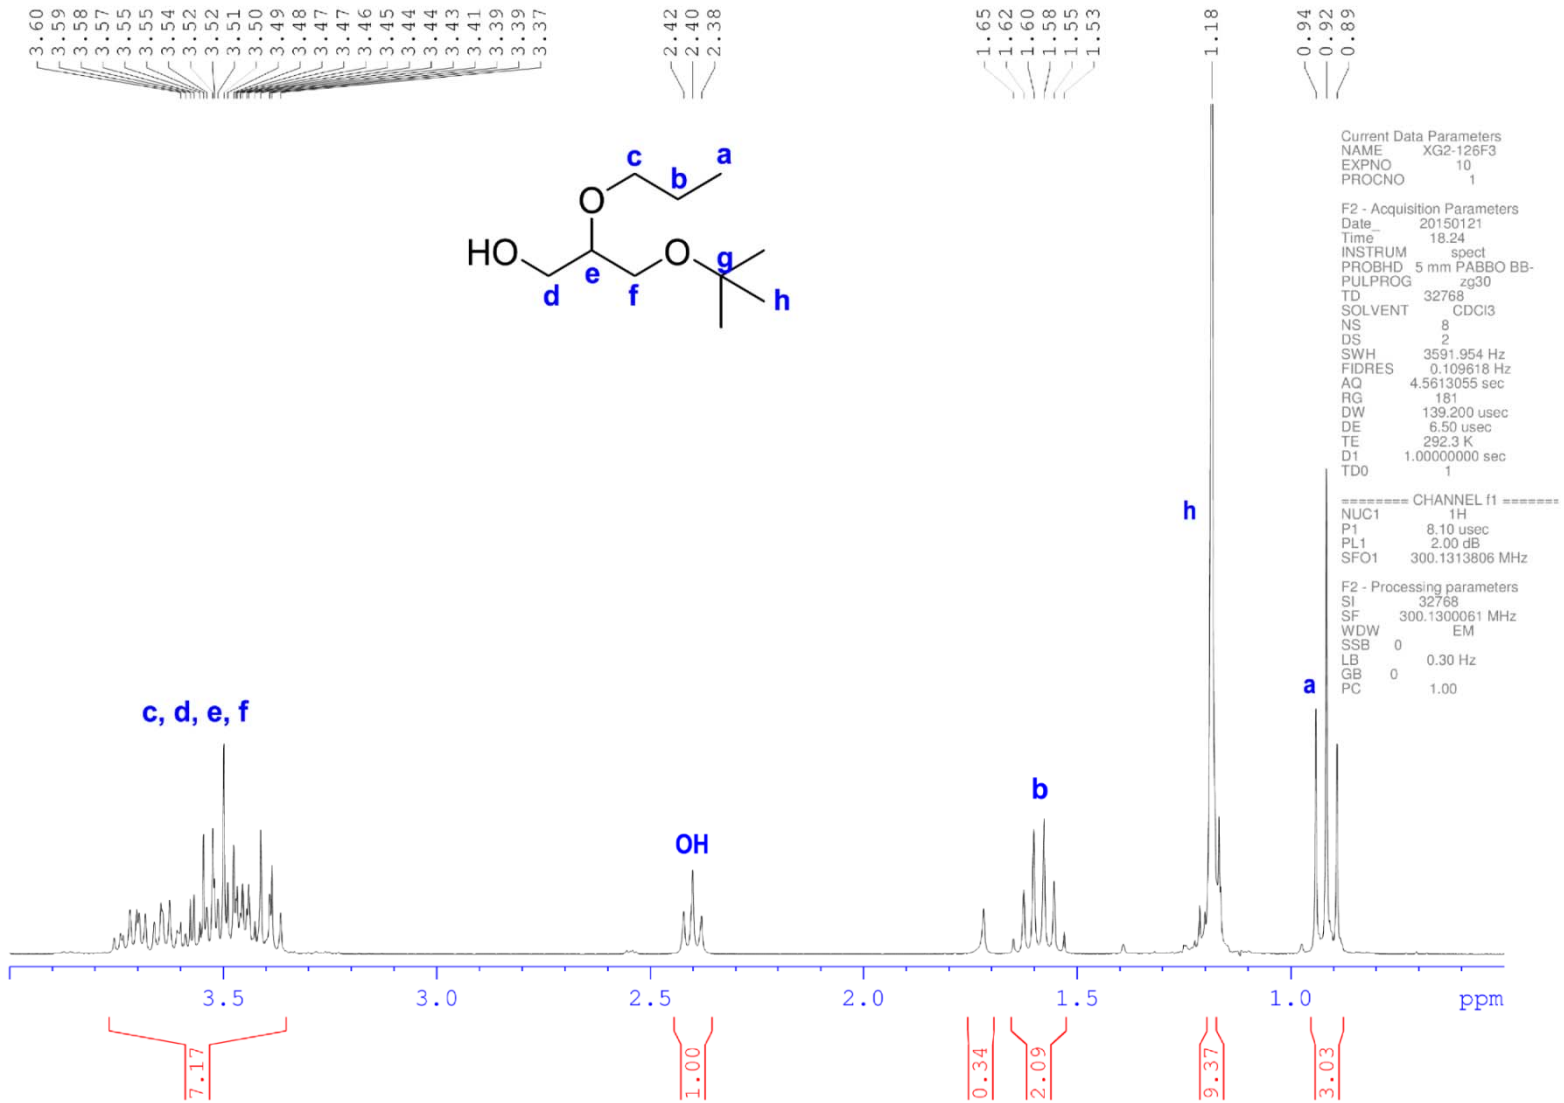

Figure SI\_81: <sup>1</sup>H NMR spectrum of compound 12b

# SI\_82

XG2-118F3 13C CDC13

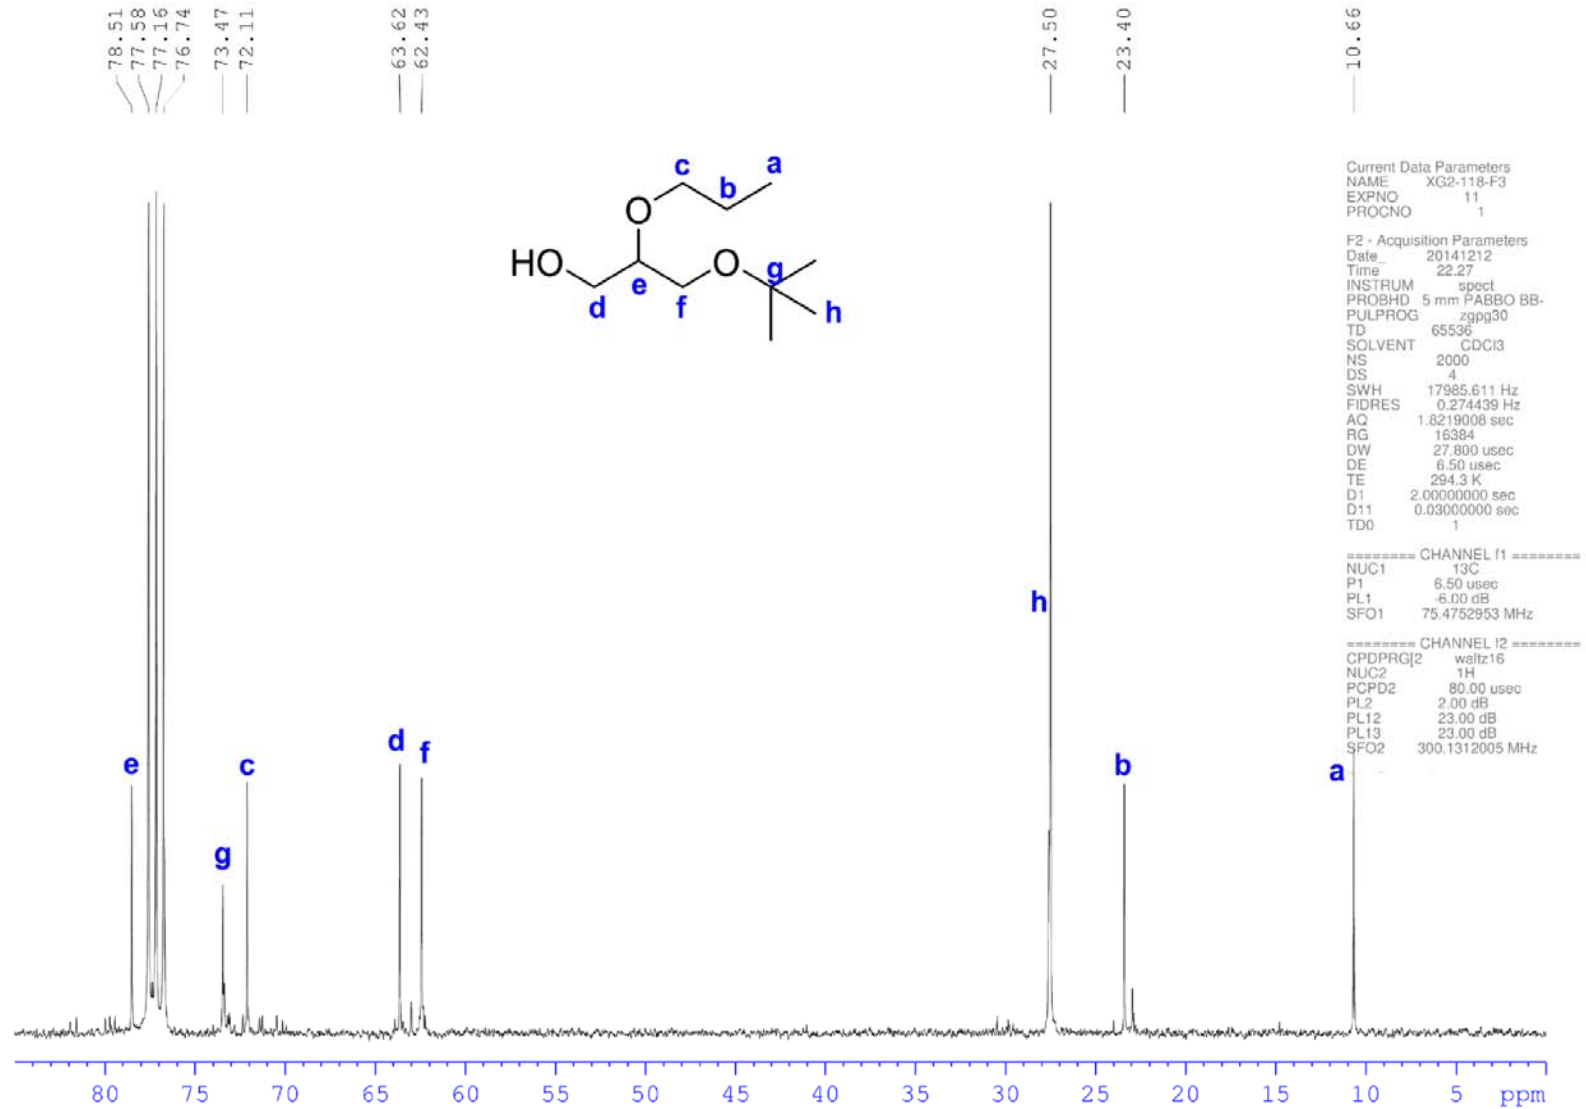

Figure SI\_82: <sup>13</sup>C NMR spectrum of compound 12b

# SI\_83

XG2-118F3 DEPT135 CDCl3

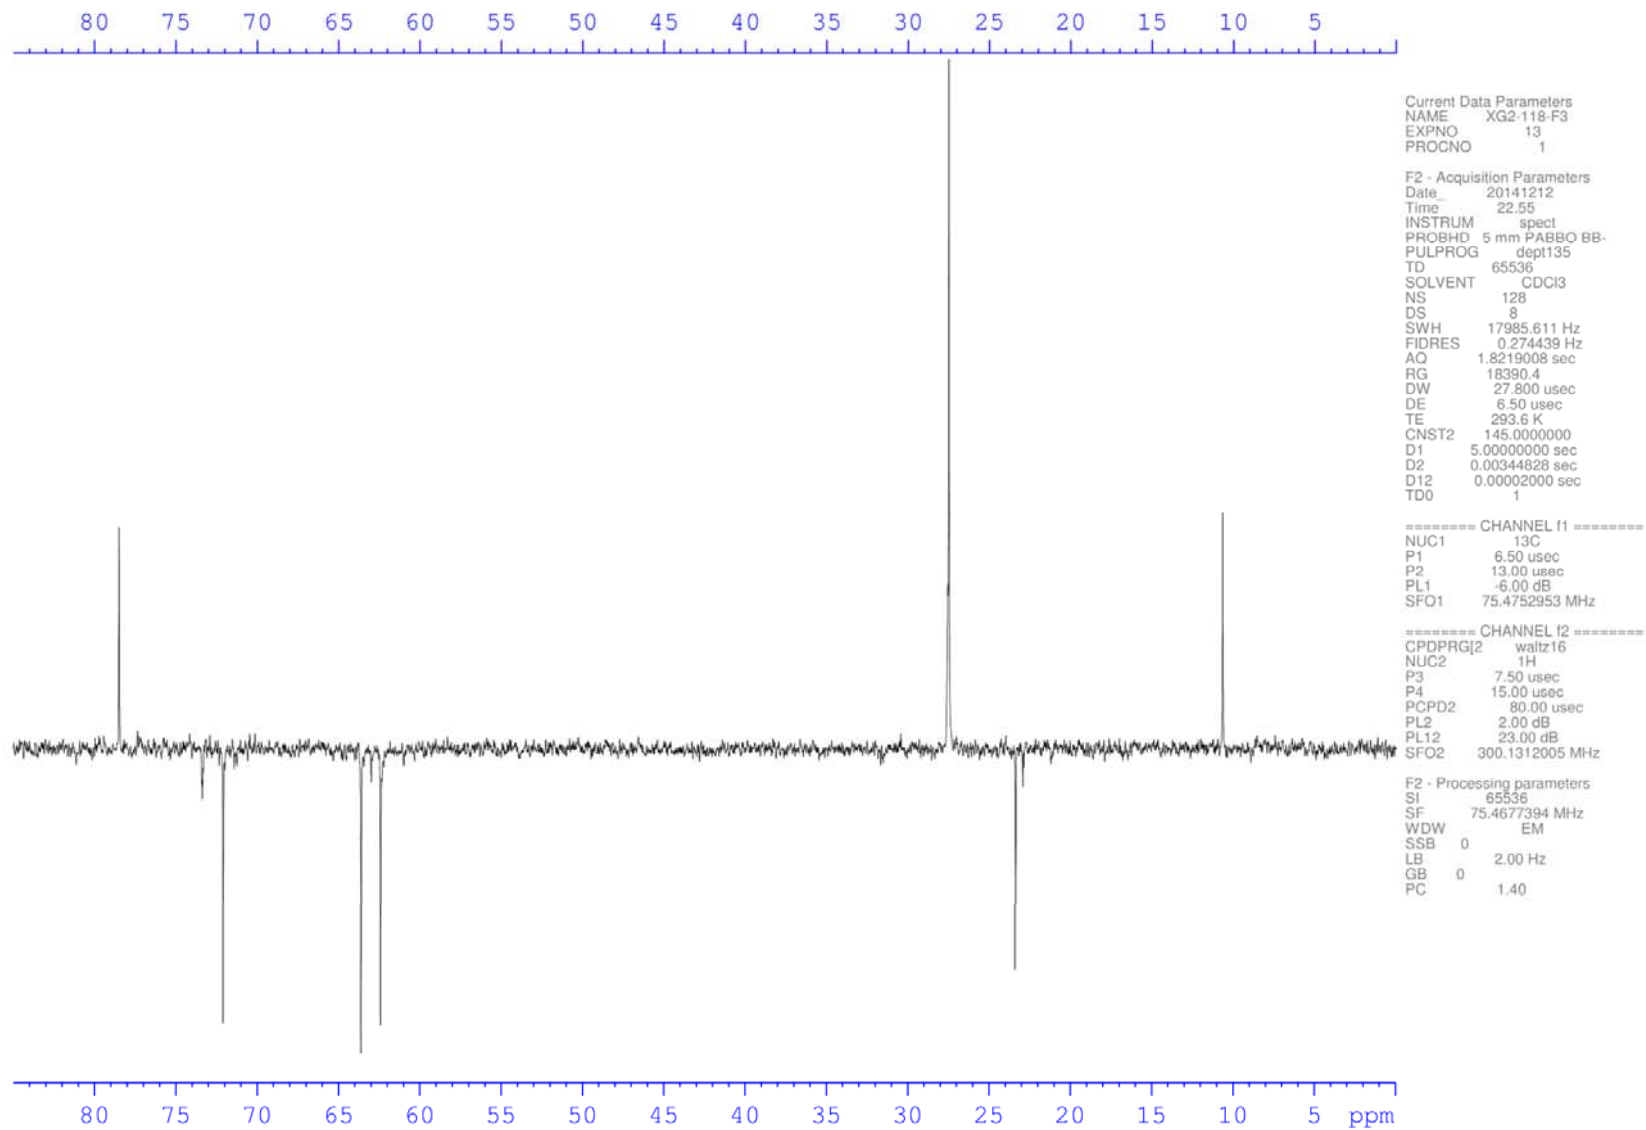

Figure SI\_83: DEPT135 NMR spectrum of compound 12b

# SI\_84

XG2-118F3 COSY CDC13

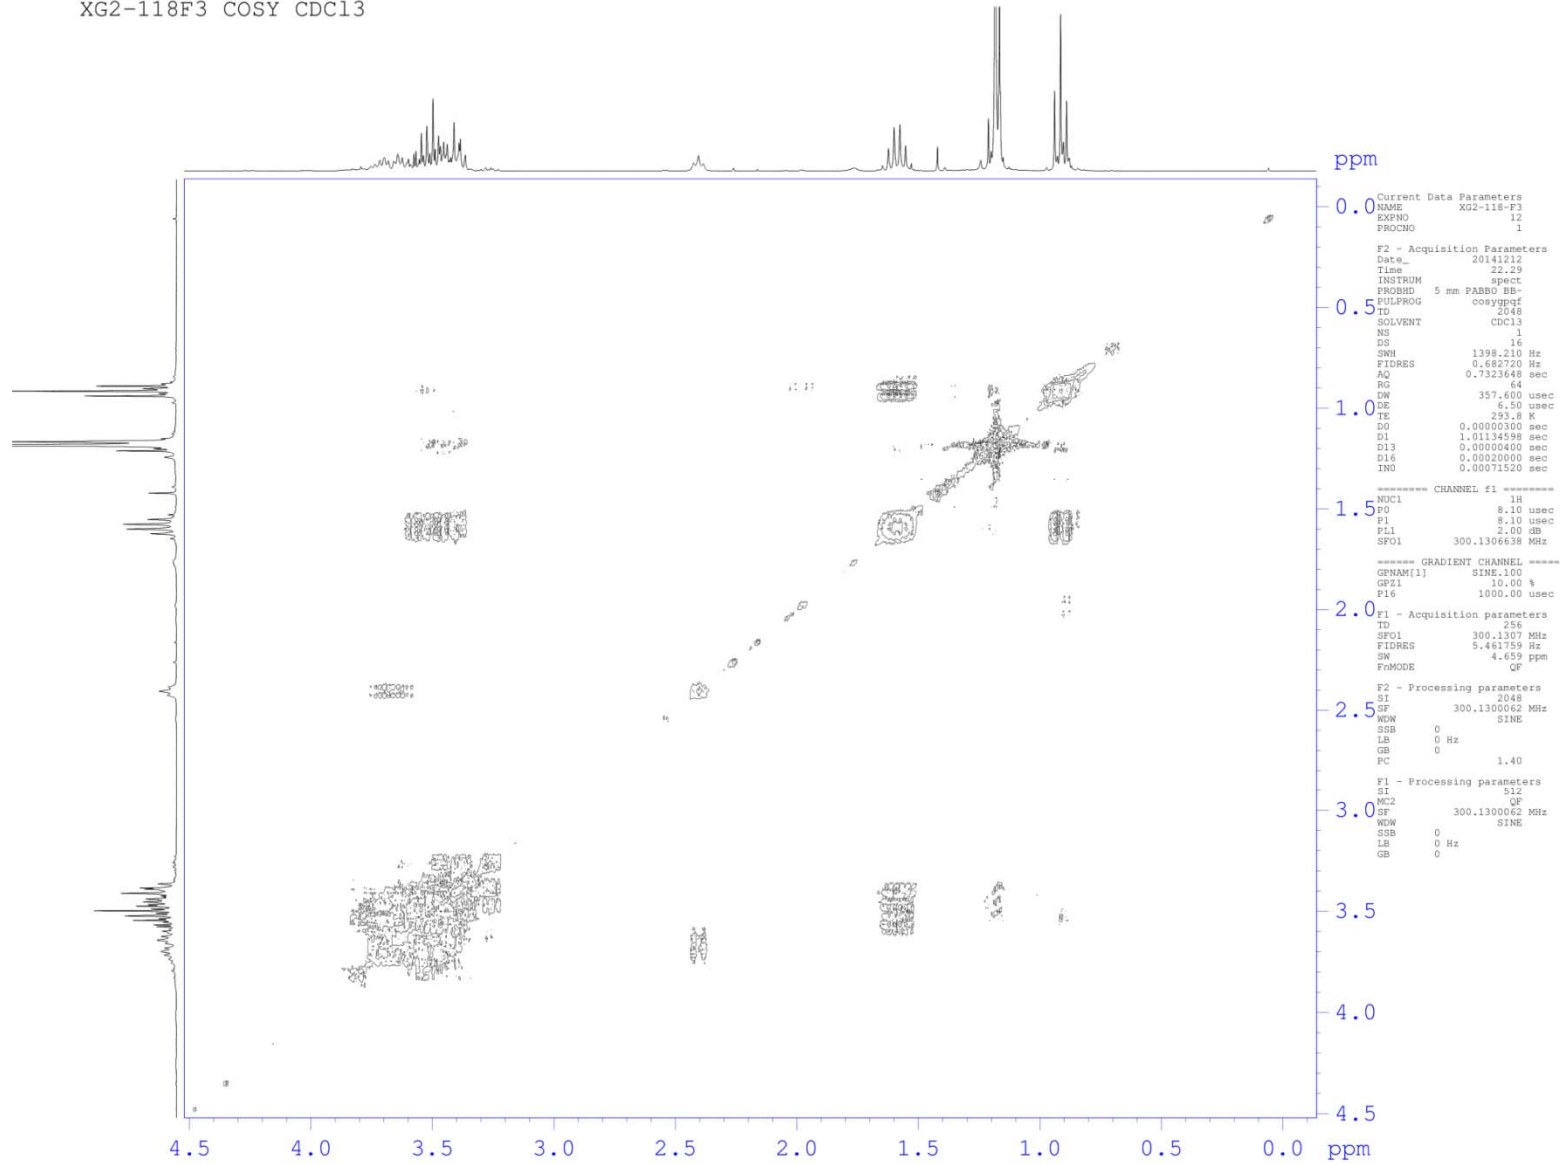

Figure SI\_84: 1H-1H NMR spectrum of compound 12b



# SI\_85

XG2-118F3 HSQC CDC13

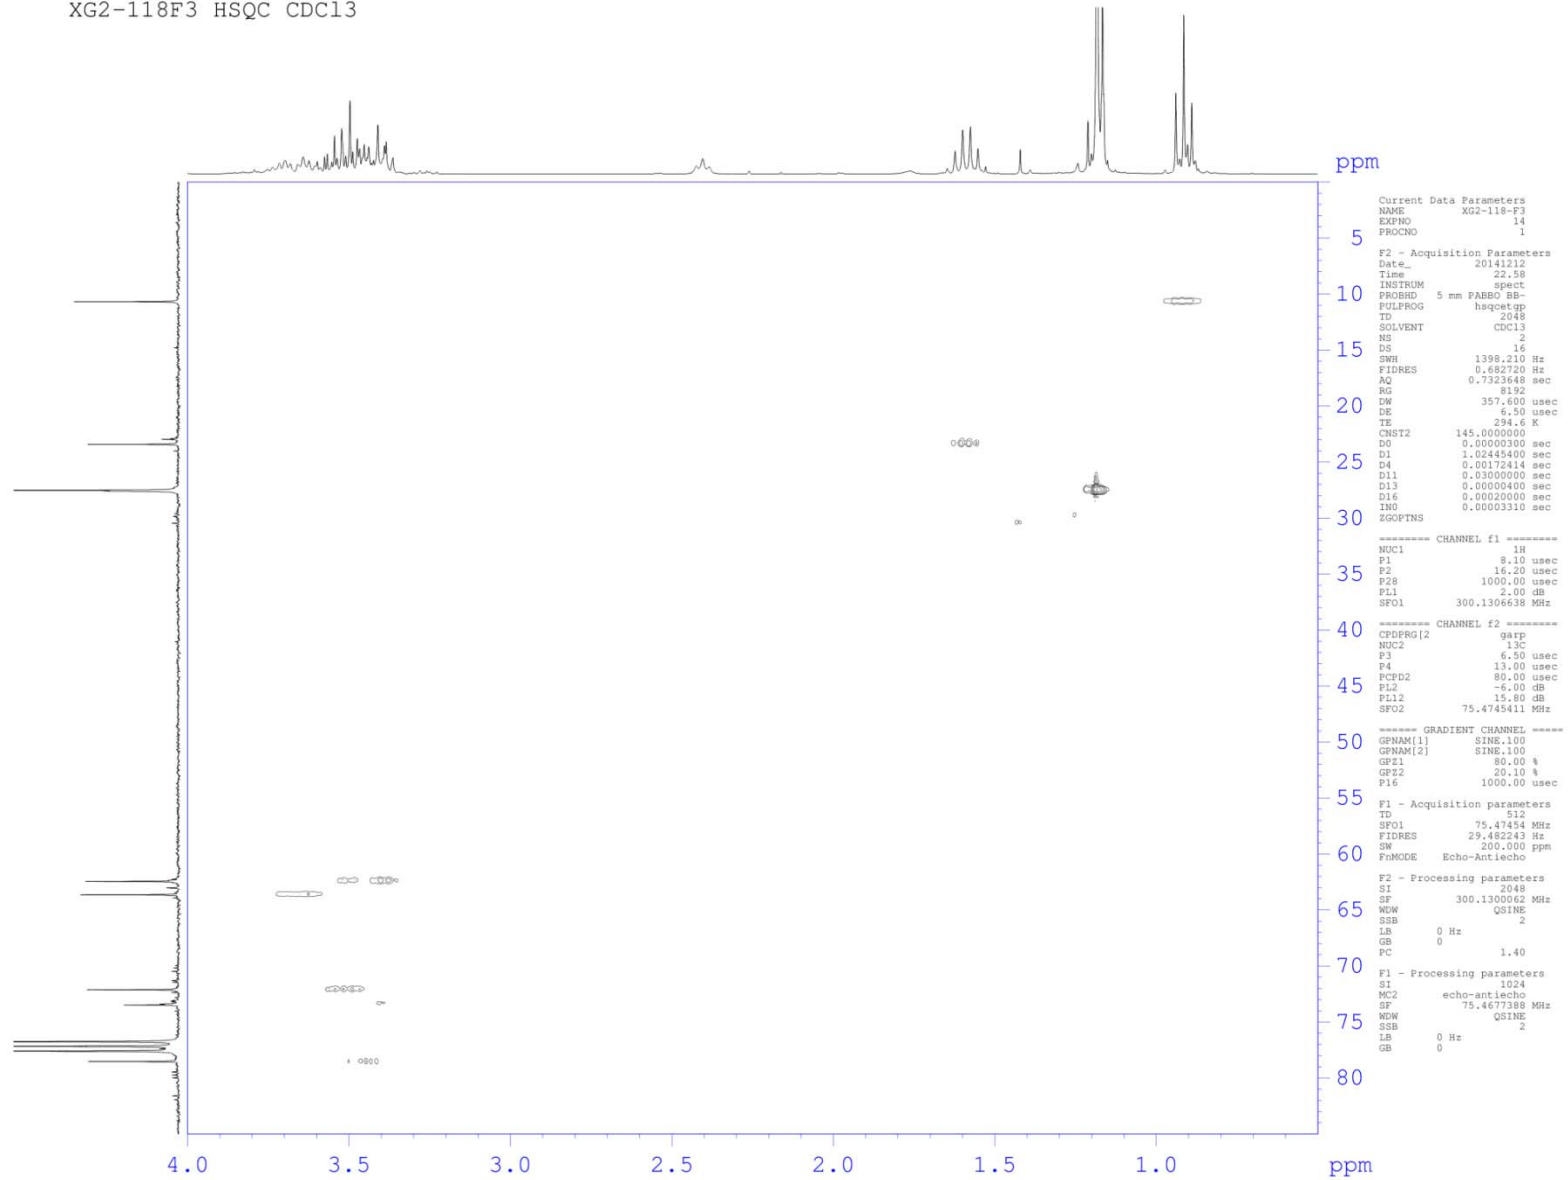

Figure SI\_85: HSQC NMR spectrum of compound 12b

# SI\_86

XG2-118F3 HMBC CDC13

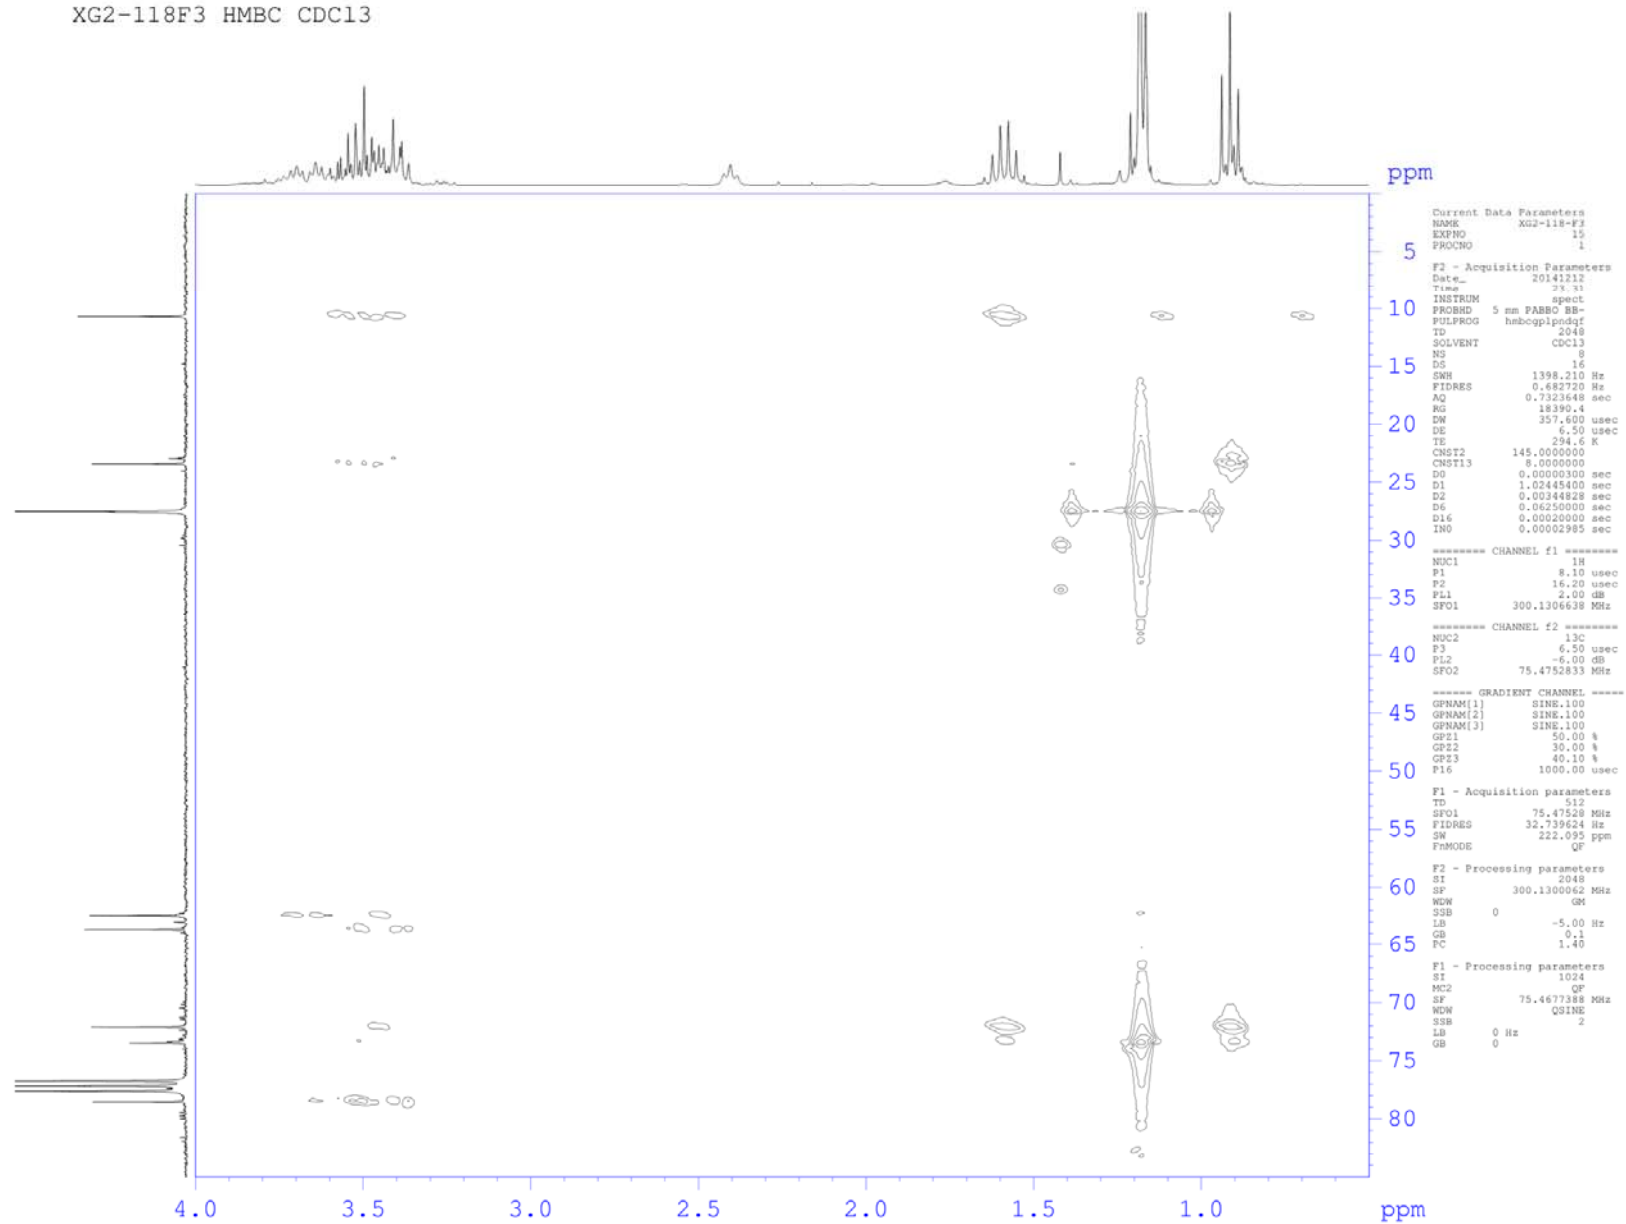

Figure SI\_86: HMBC NMR spectrum of compound 12b

# SI\_87

20150223\_XG2-118F3 #7 RT: 0.05 AV: 1 NL: 1.01E7  
T: FTMS + p ESI Full ms [150.00-2000.00]

**XG2-118F3- ESI+**  
MeOH+CH<sub>2</sub>Cl<sub>2</sub>

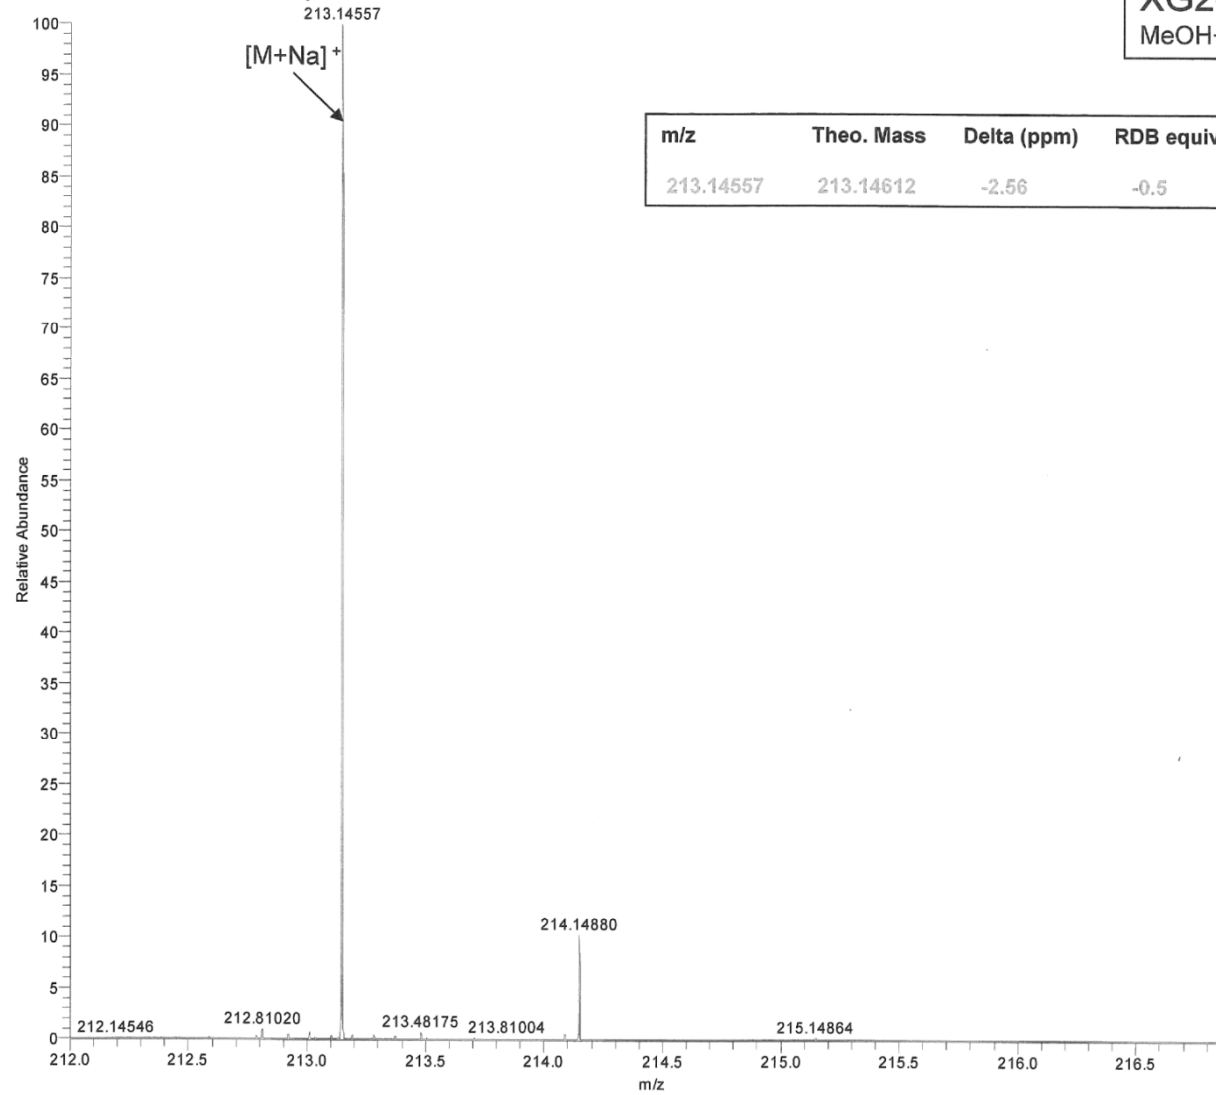

Figure SI\_87: HRMS spectrum of compound 12b

SI\_88

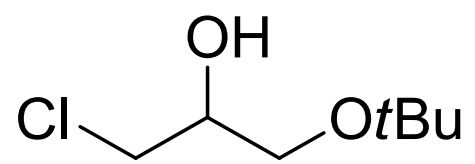

**12c**

# SI\_89

XG2-121F1 1H CDC13

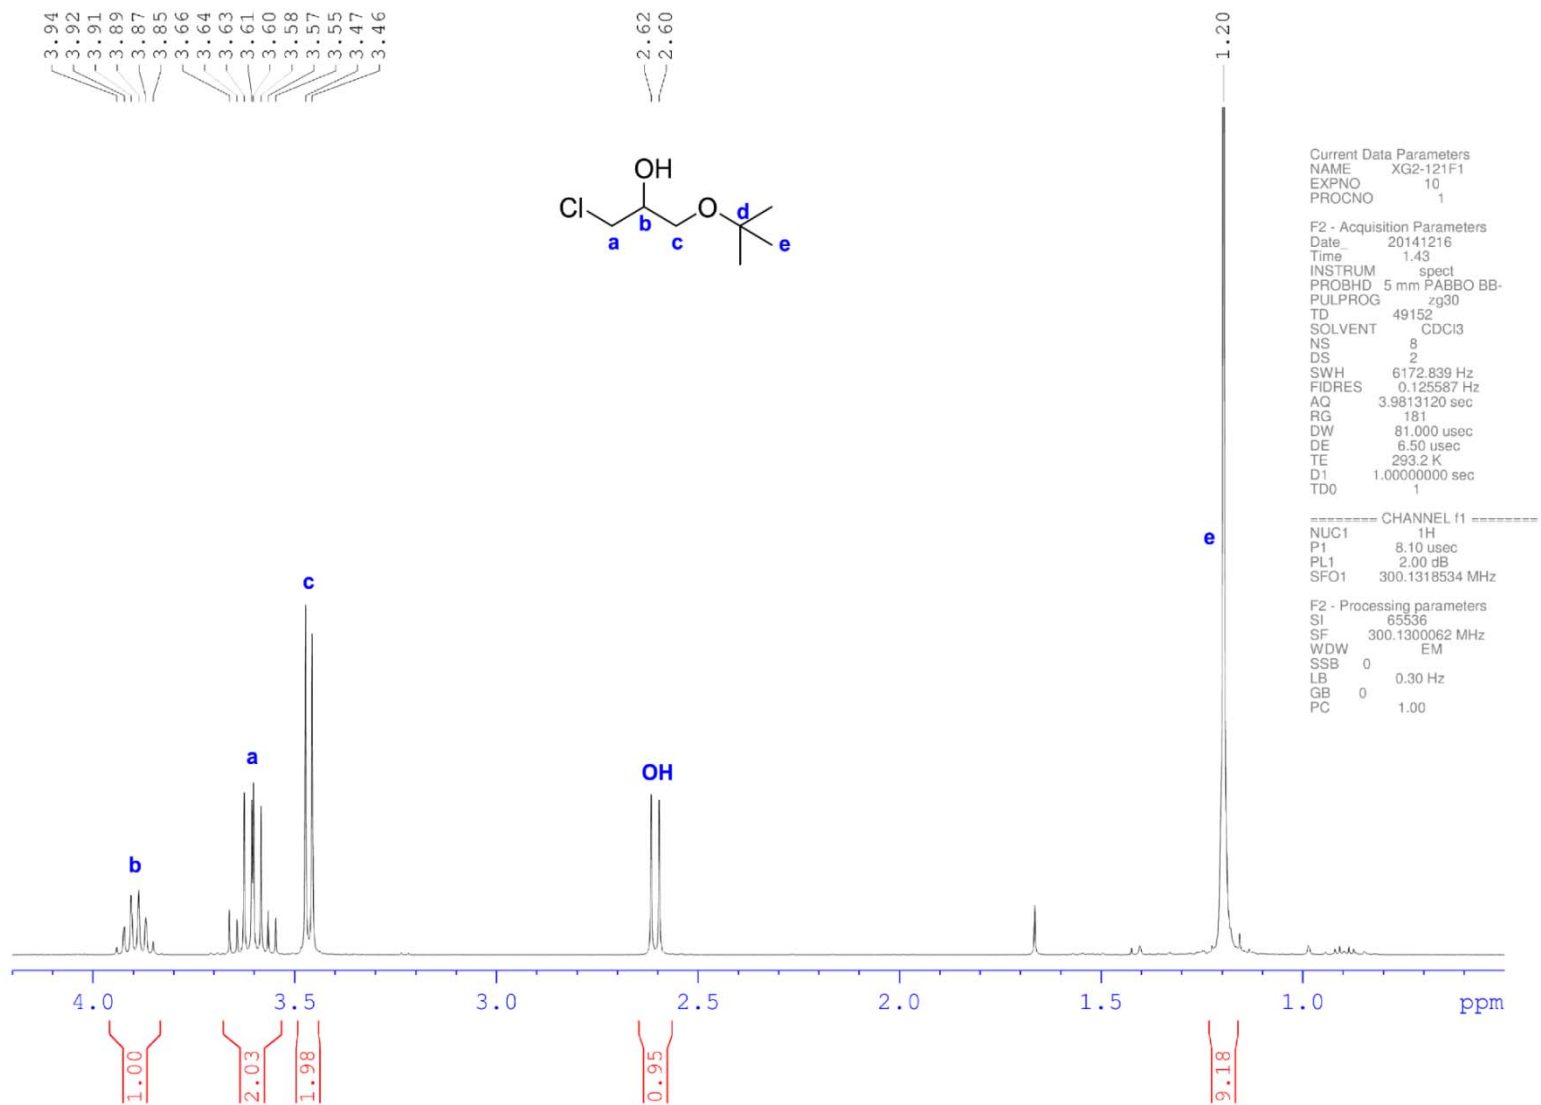

Figure SI\_89: <sup>1</sup>H NMR spectrum of compound 12c

# SI\_90

XG2-121F1 13C CDC13

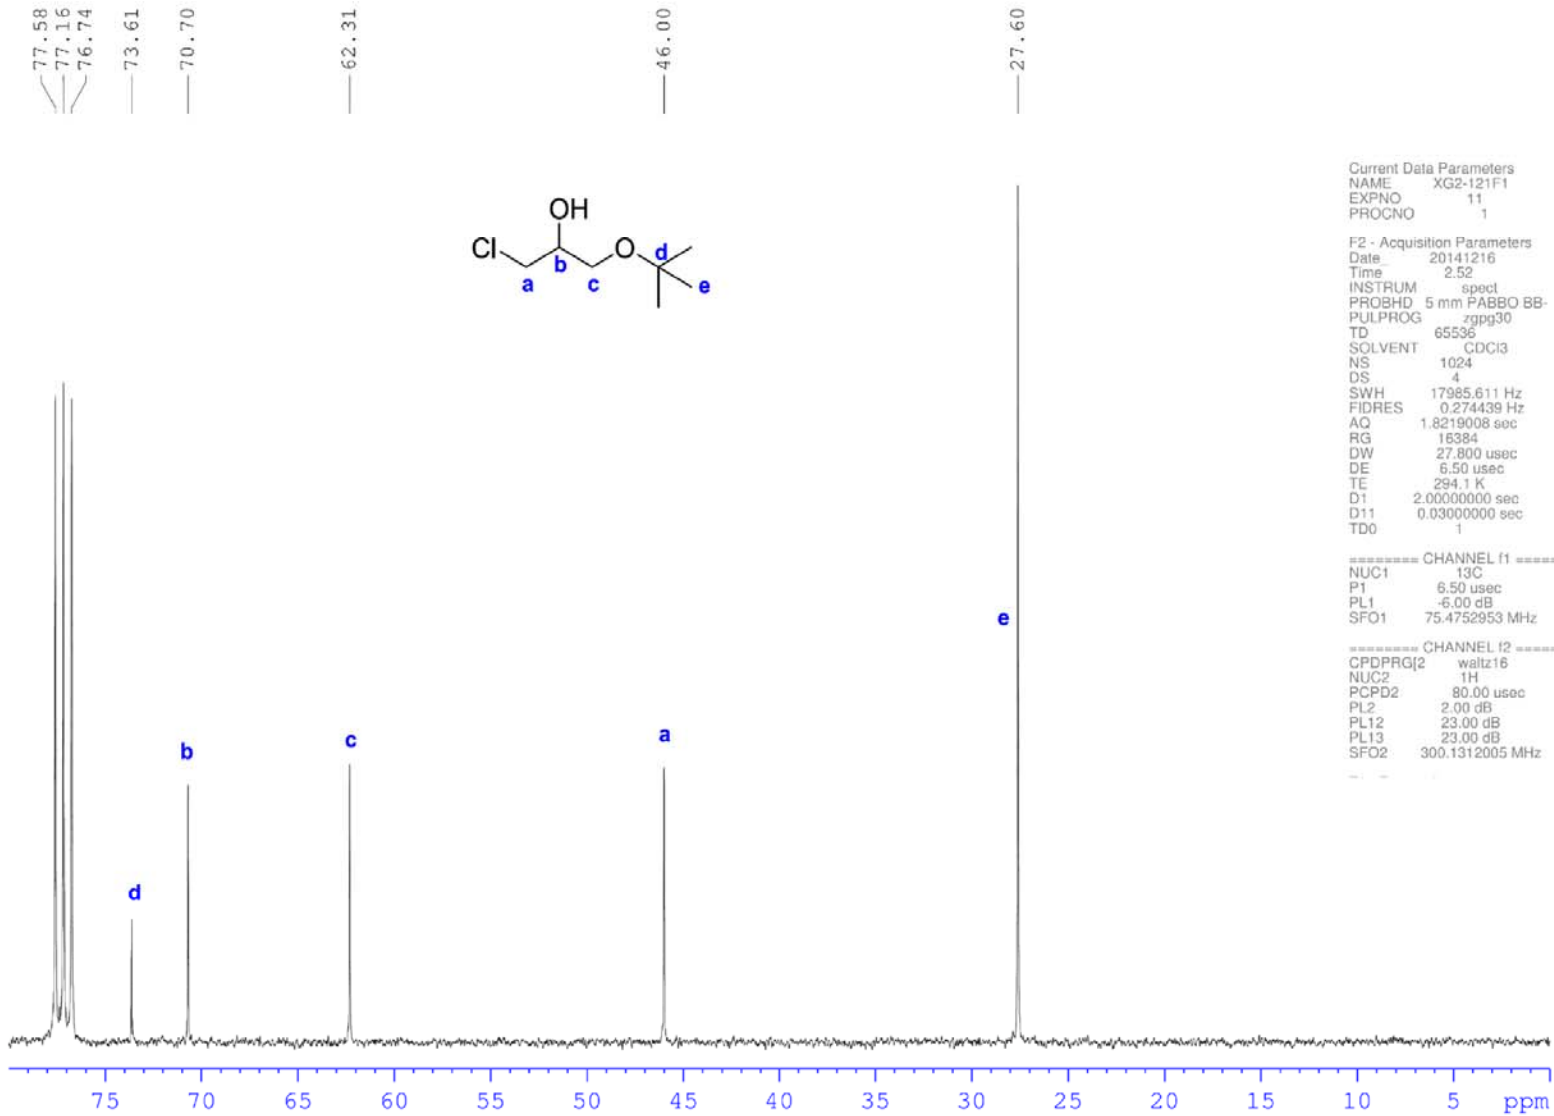

Figure SI\_901: <sup>13</sup>C NMR spectrum of compound 12c

# SI\_91

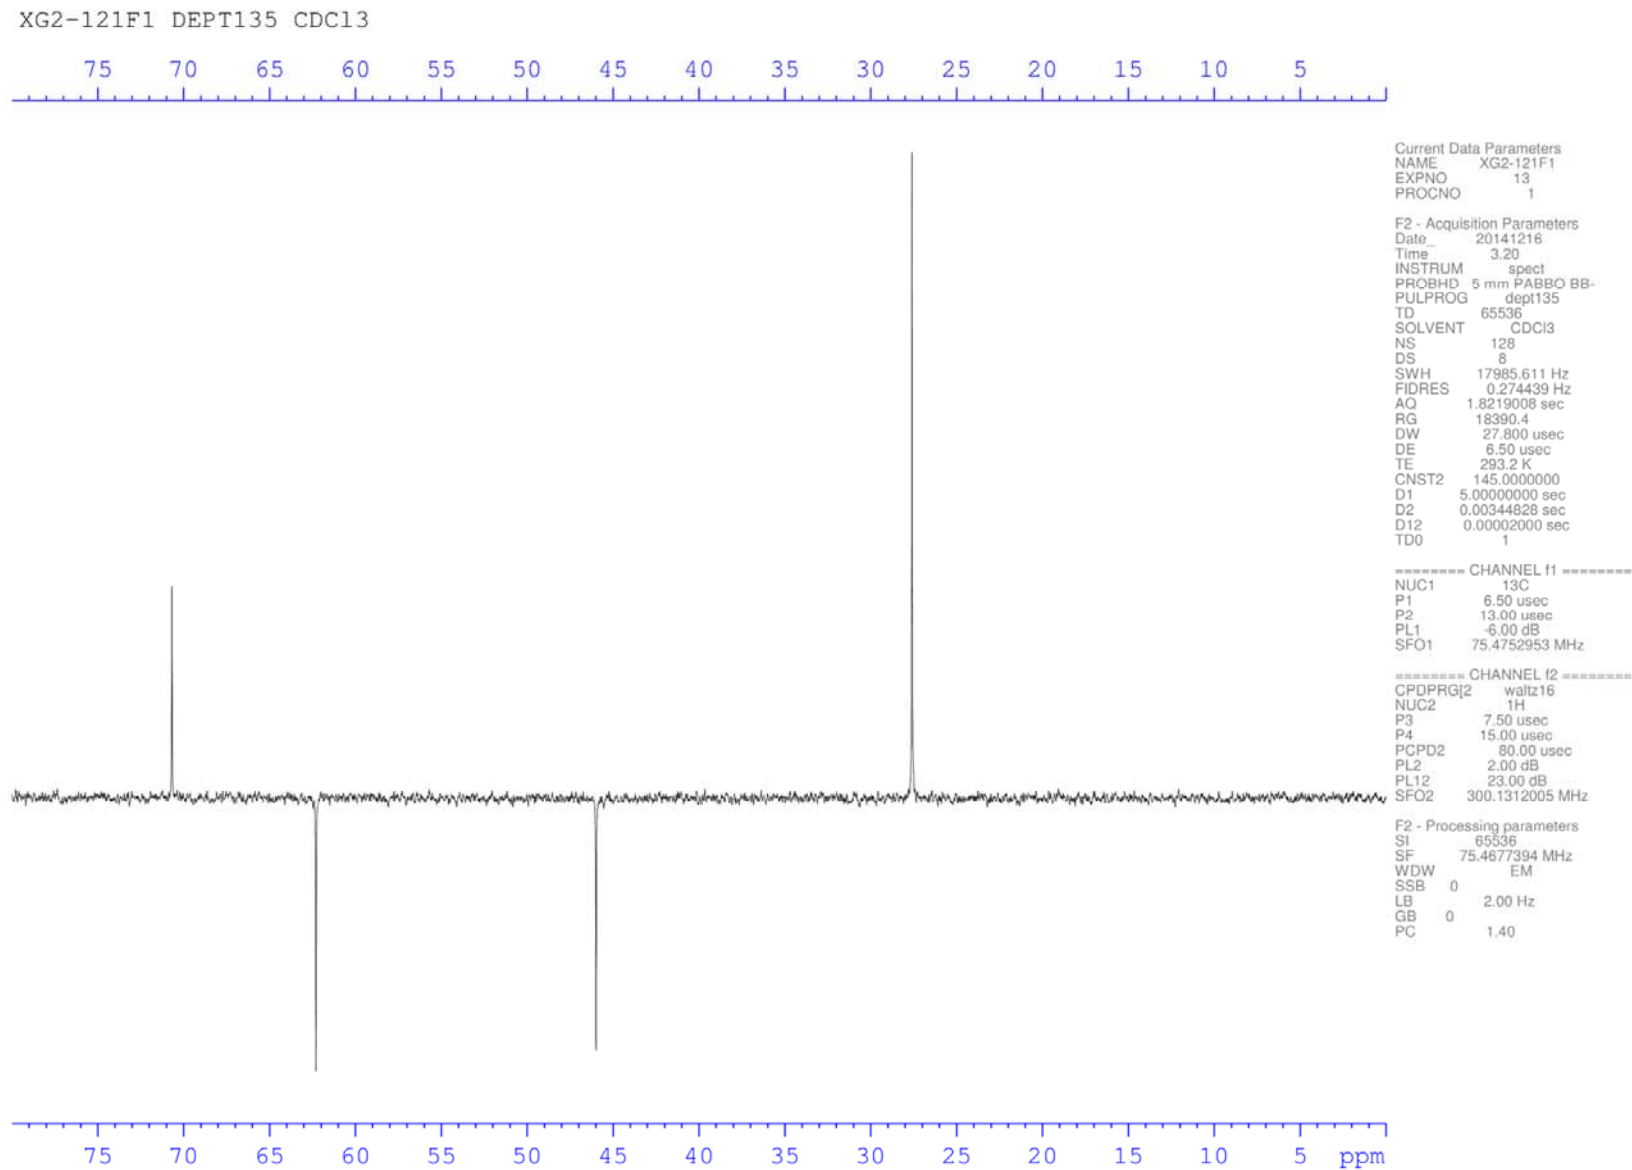

Figure SI\_91: DEPT 135 NMR spectrum of compound 12c

# SI\_92

XG2-121F1 COSY CDC13

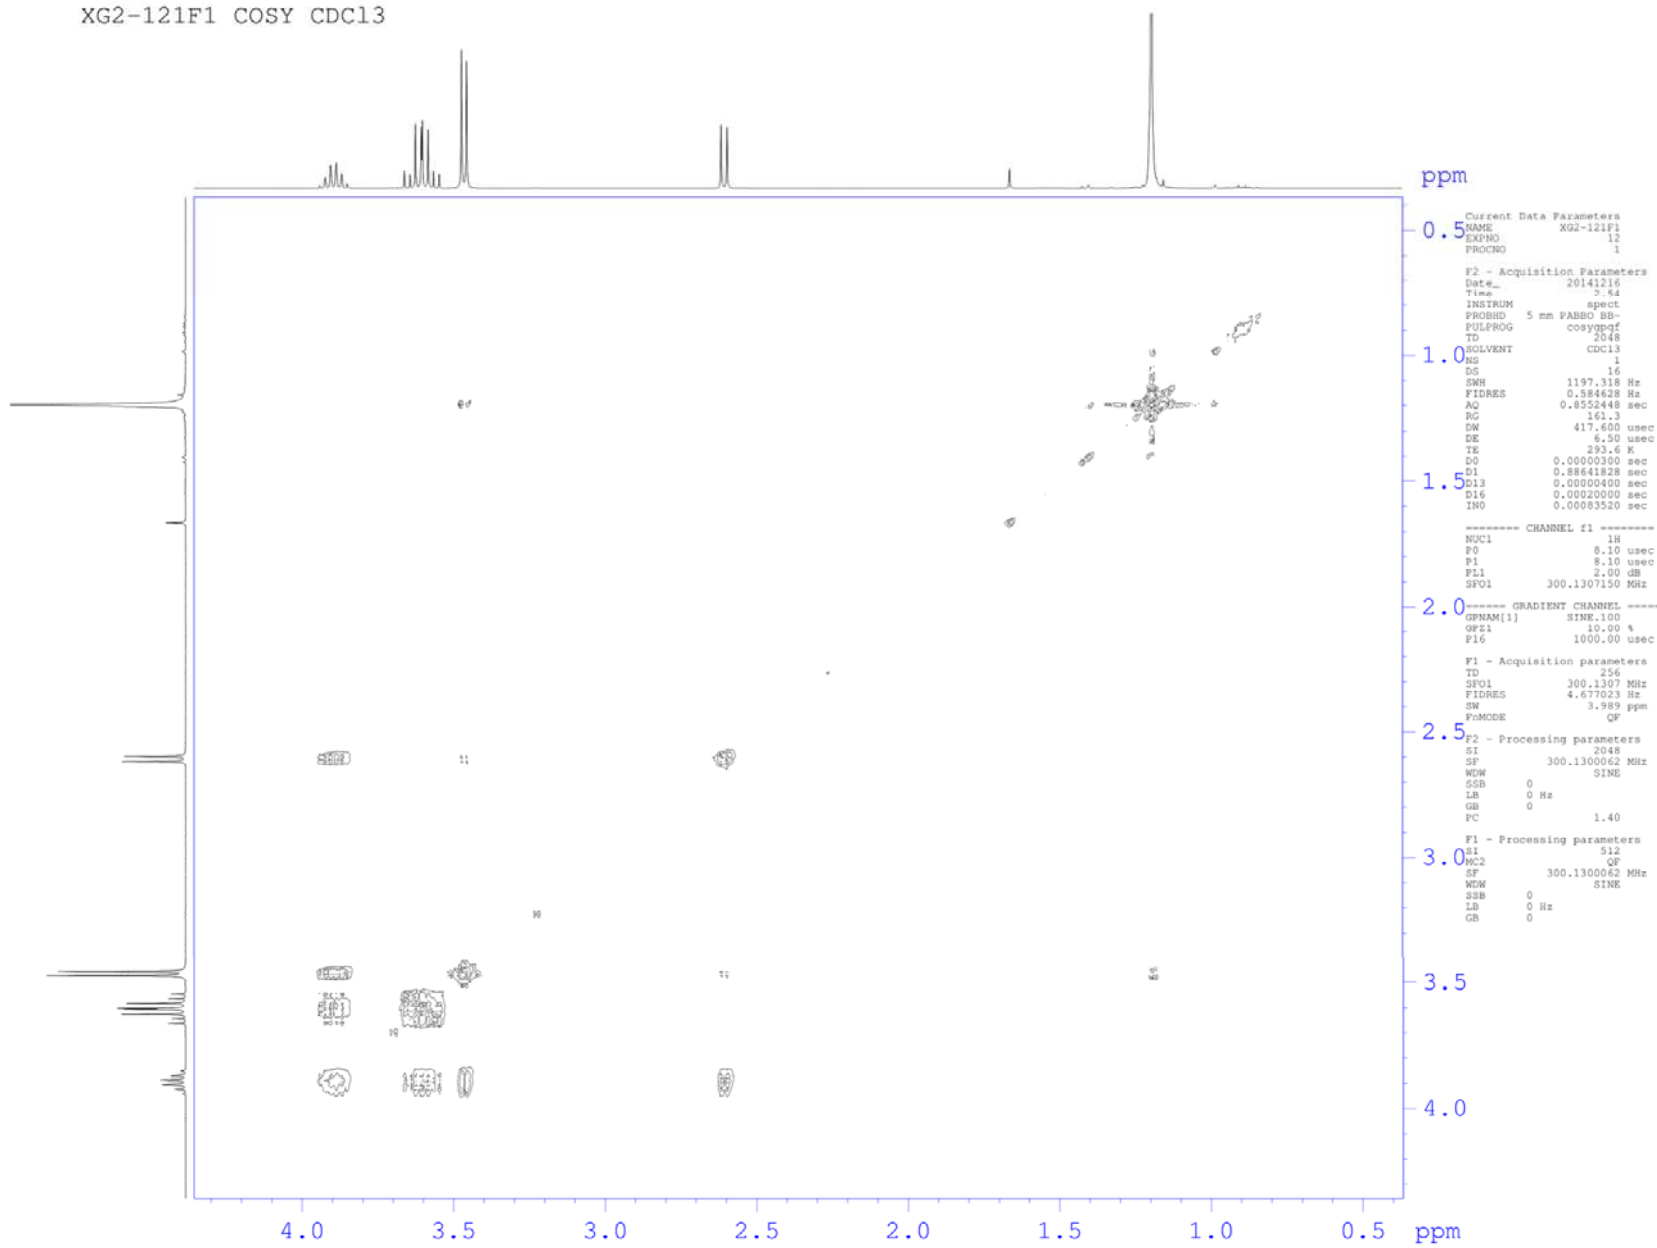

Figure SI\_92: COSY NMR spectrum of compound 12c



# SI\_93

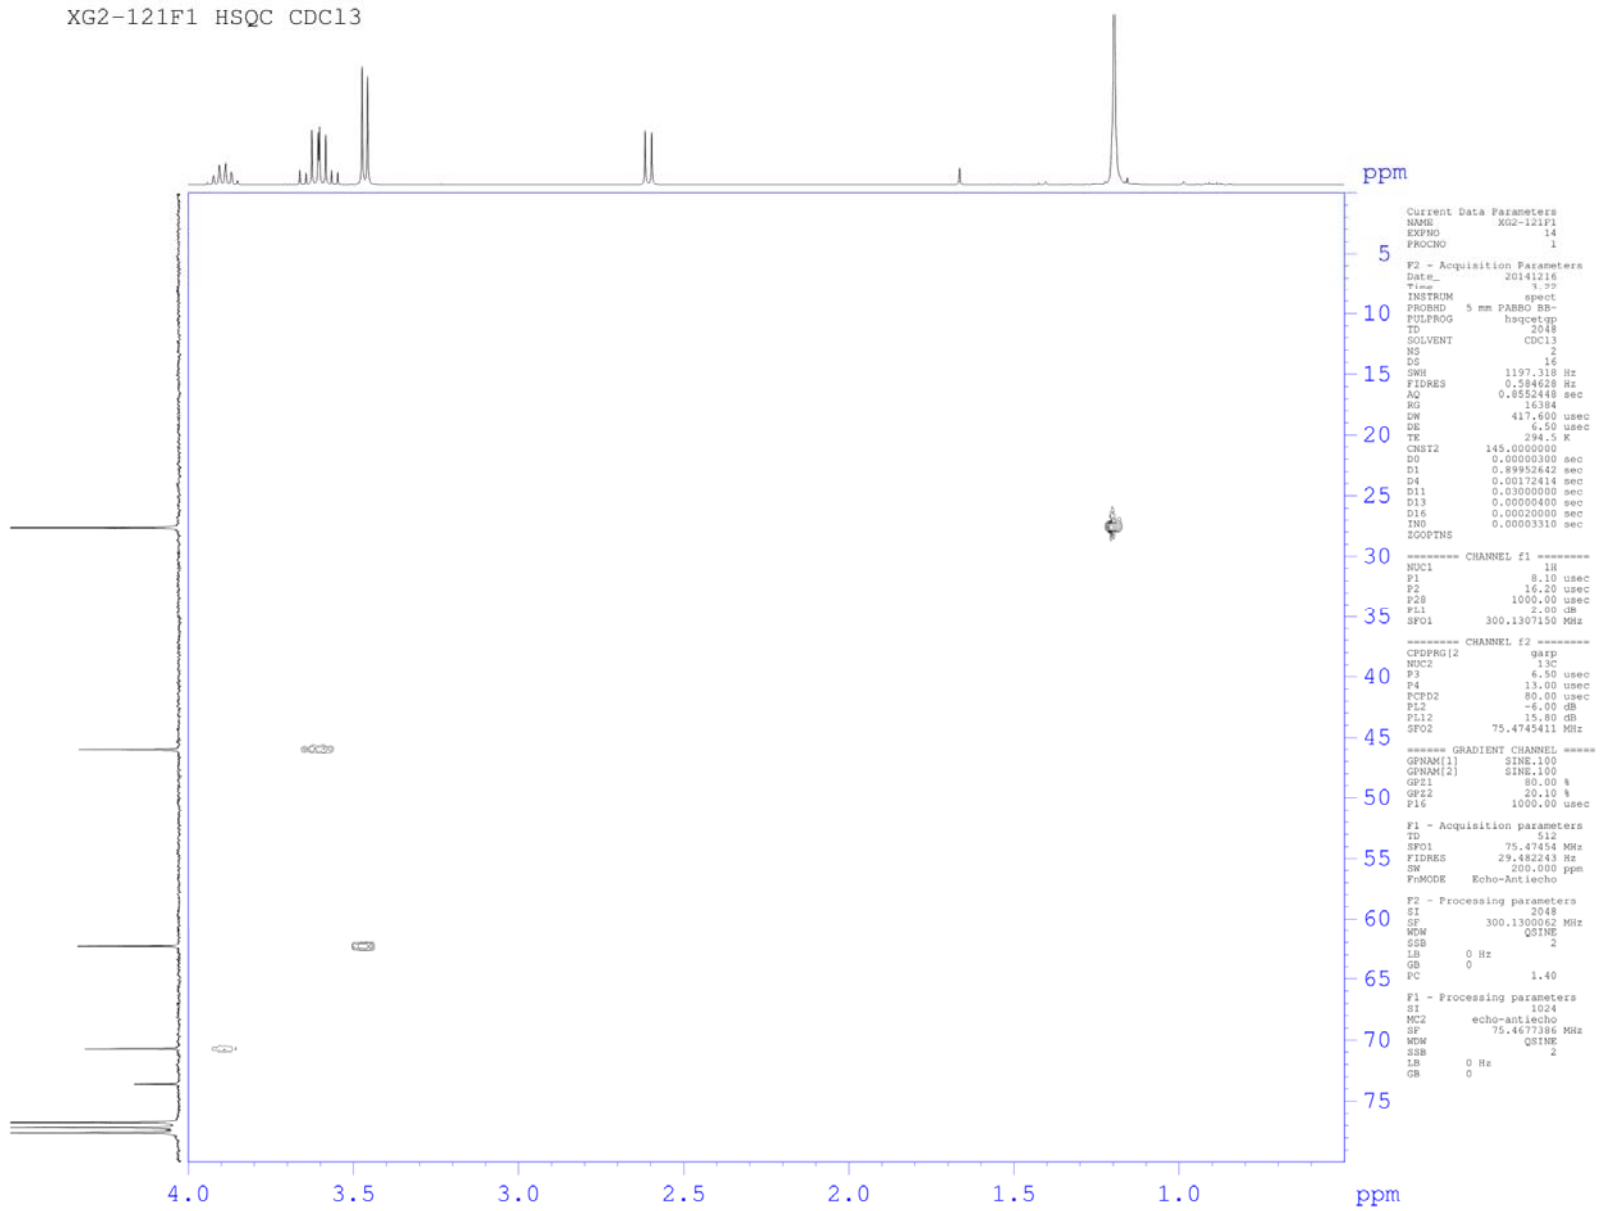

Figure SI\_93: HSQC NMR spectrum of compound 12c

# SI\_94

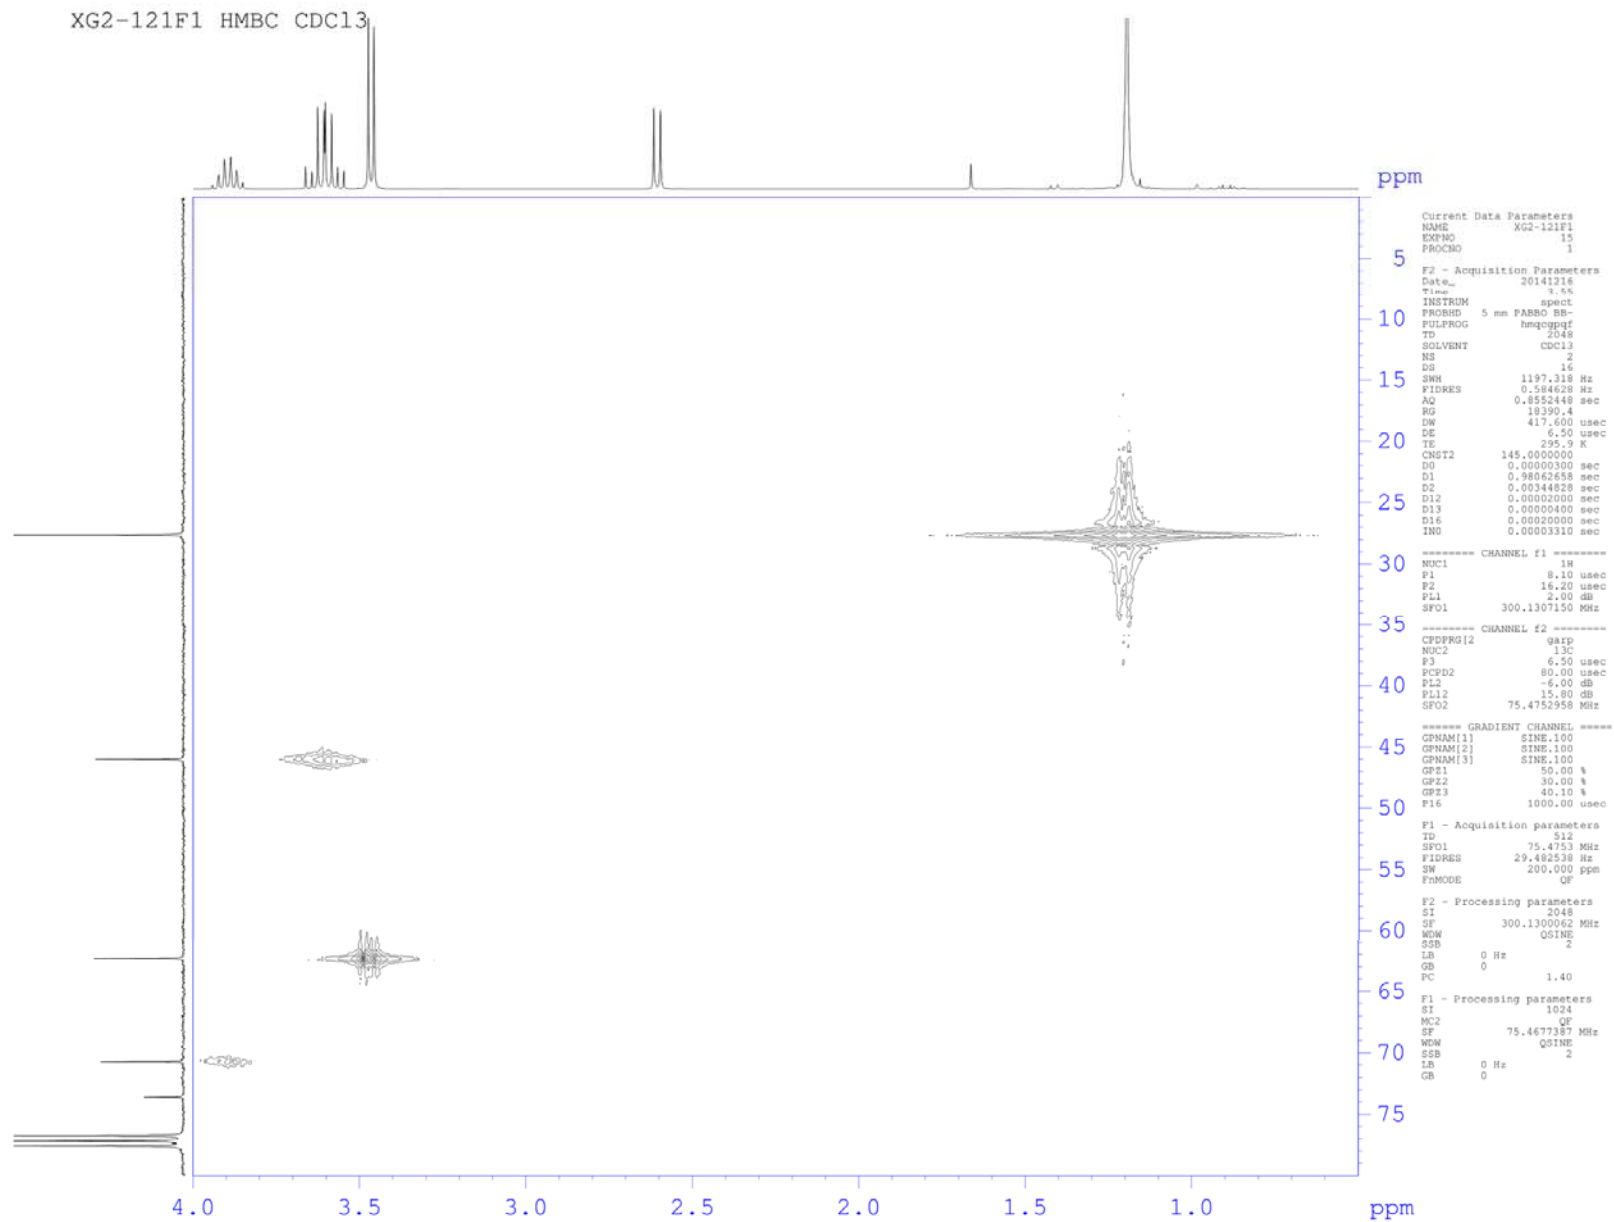

Figure SI\_94: HMBC NMR spectrum of compound 12c

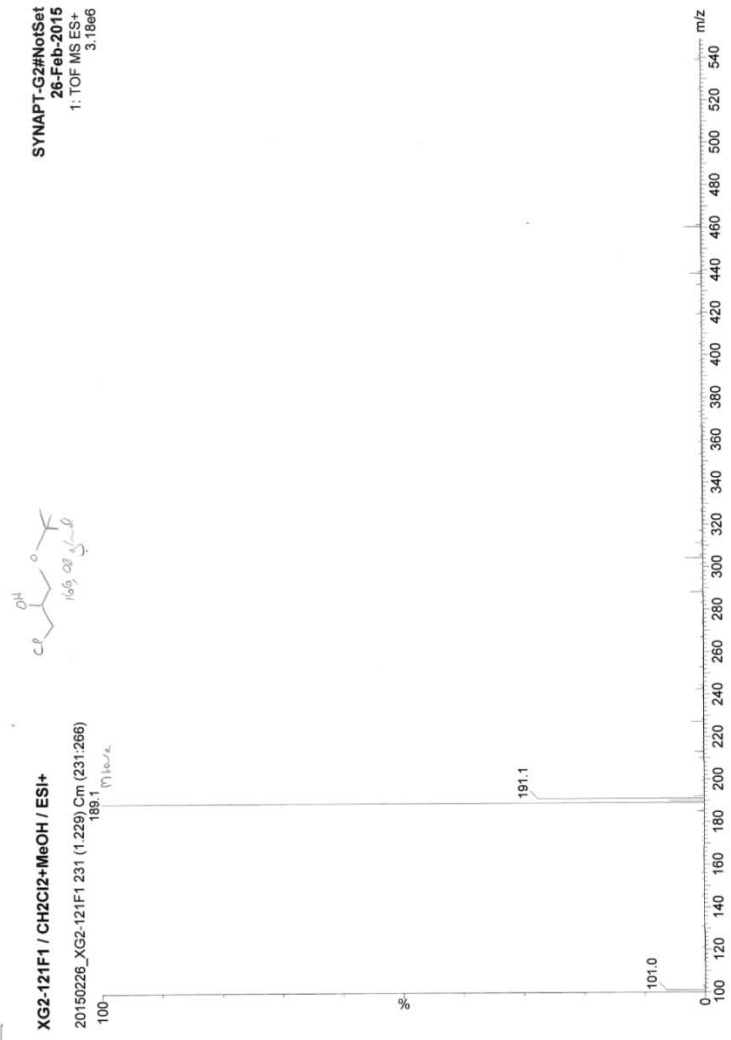

Elemental Composition Report

**Single Mass Analysis**  
Tolerance = 5.0 PPM / DBE: min = -1.5, max = 100.0  
Element prediction: Off  
Number of isotope peaks used for I-FT = 4  
Monoisotopic Mass: Even Electron Ions  
14 formula(e) evaluated with 1 results within limits (up to 50 closest results for each mass)  
Elements Used:  
C: 0-70 H: 0-120 O: 0-6 Cl: 1-1 Na: 1-1

SYNAPT-G2#NoiSet  
26-Feb-2015  
1: TOF MS ES+  
20150226\_XG2-121F1 231 (1.229) AMZ (A:20000.0:0.0:0.0); Cm (231:266)  
XG2-121F1 / CH2Cl2+MeOH / ESI+  
6.52e+006

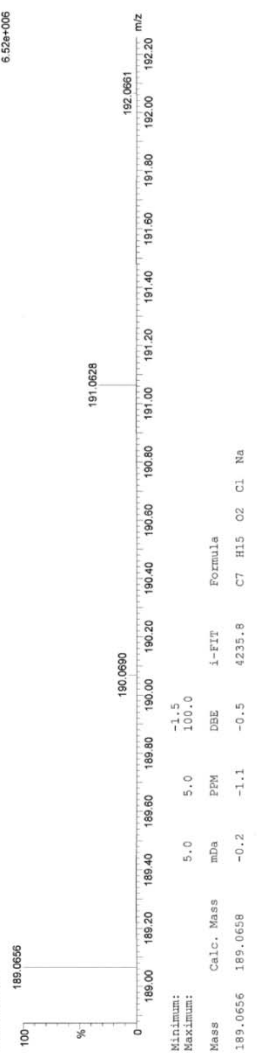

Figure SI\_95: ESI HRMS spectrum of compound 12c

SI\_96

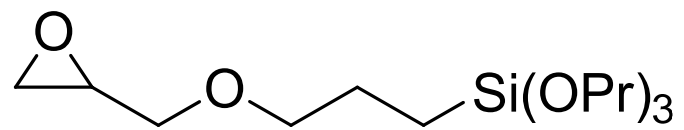

**13a**

SI\_97

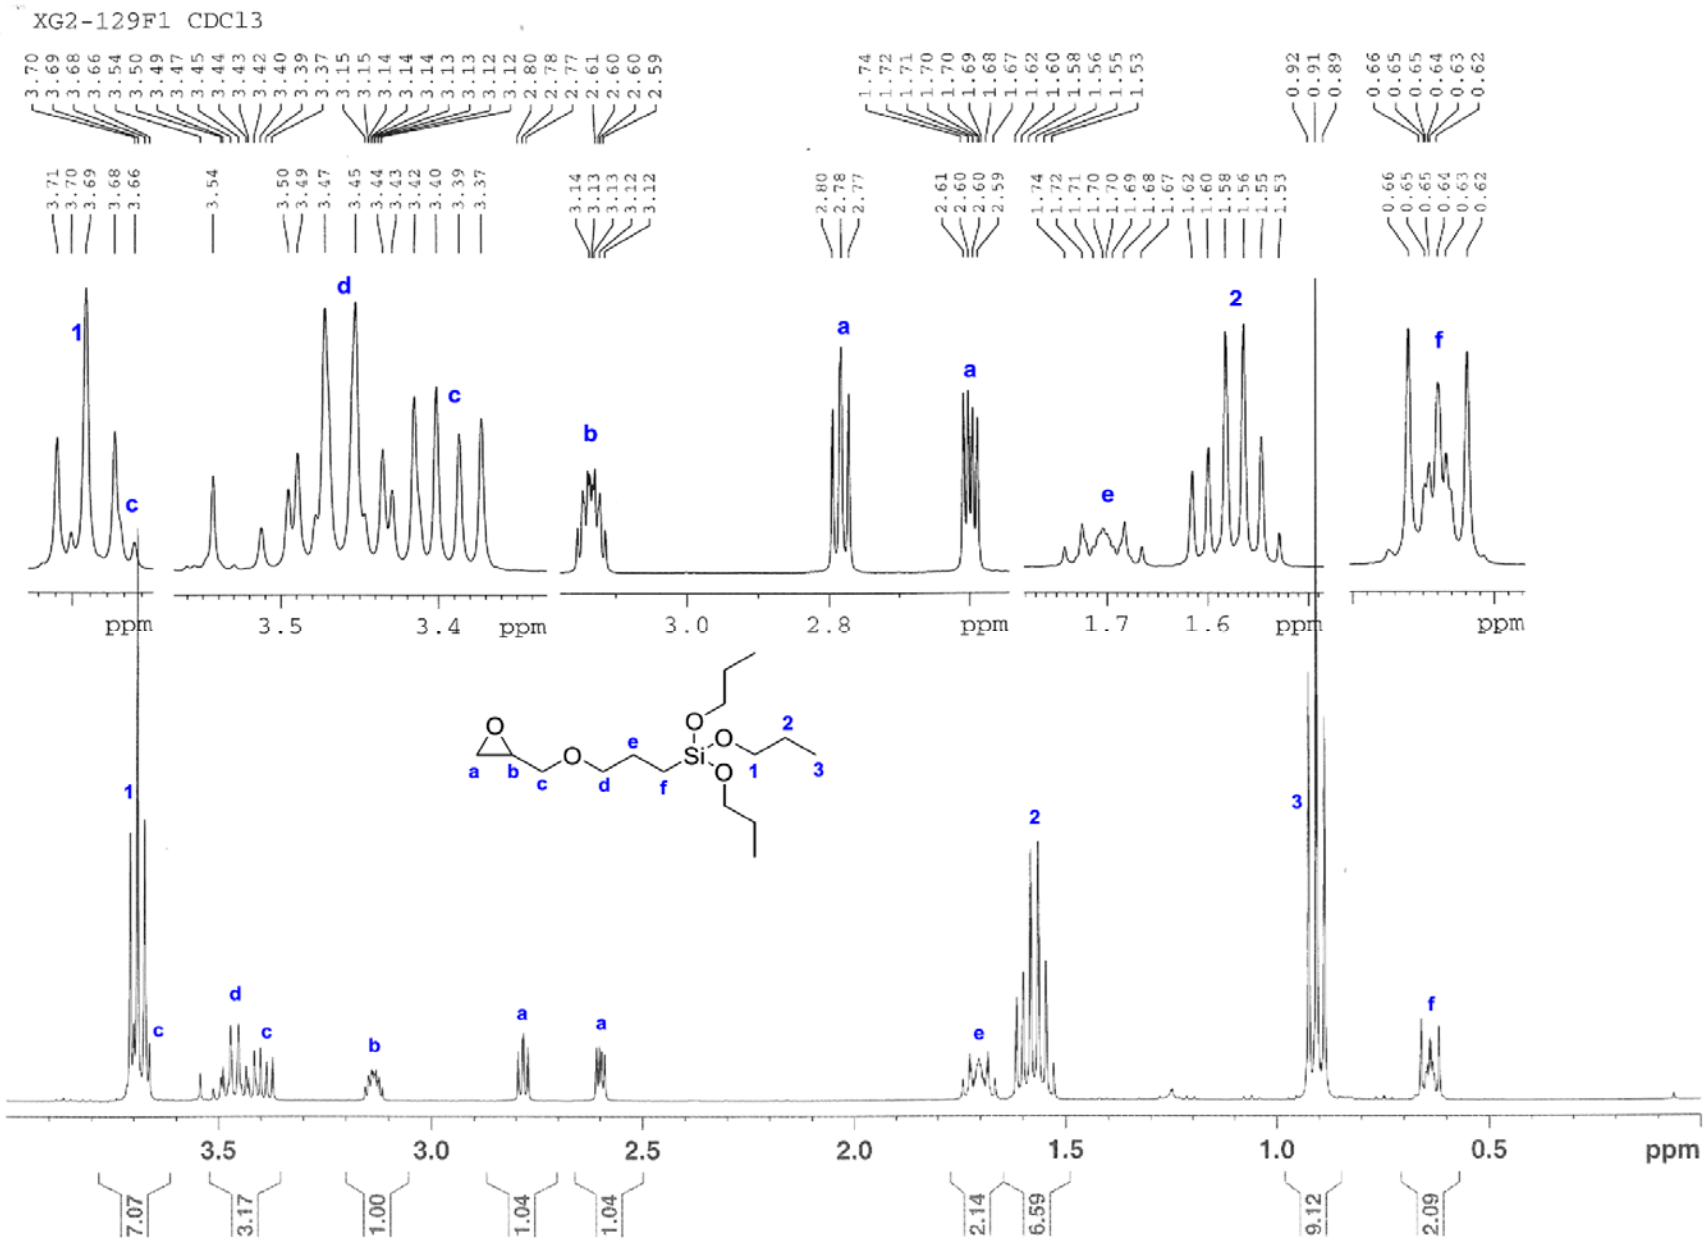

Figure SI\_97: <sup>1</sup>H NMR spectrum of compound 13a

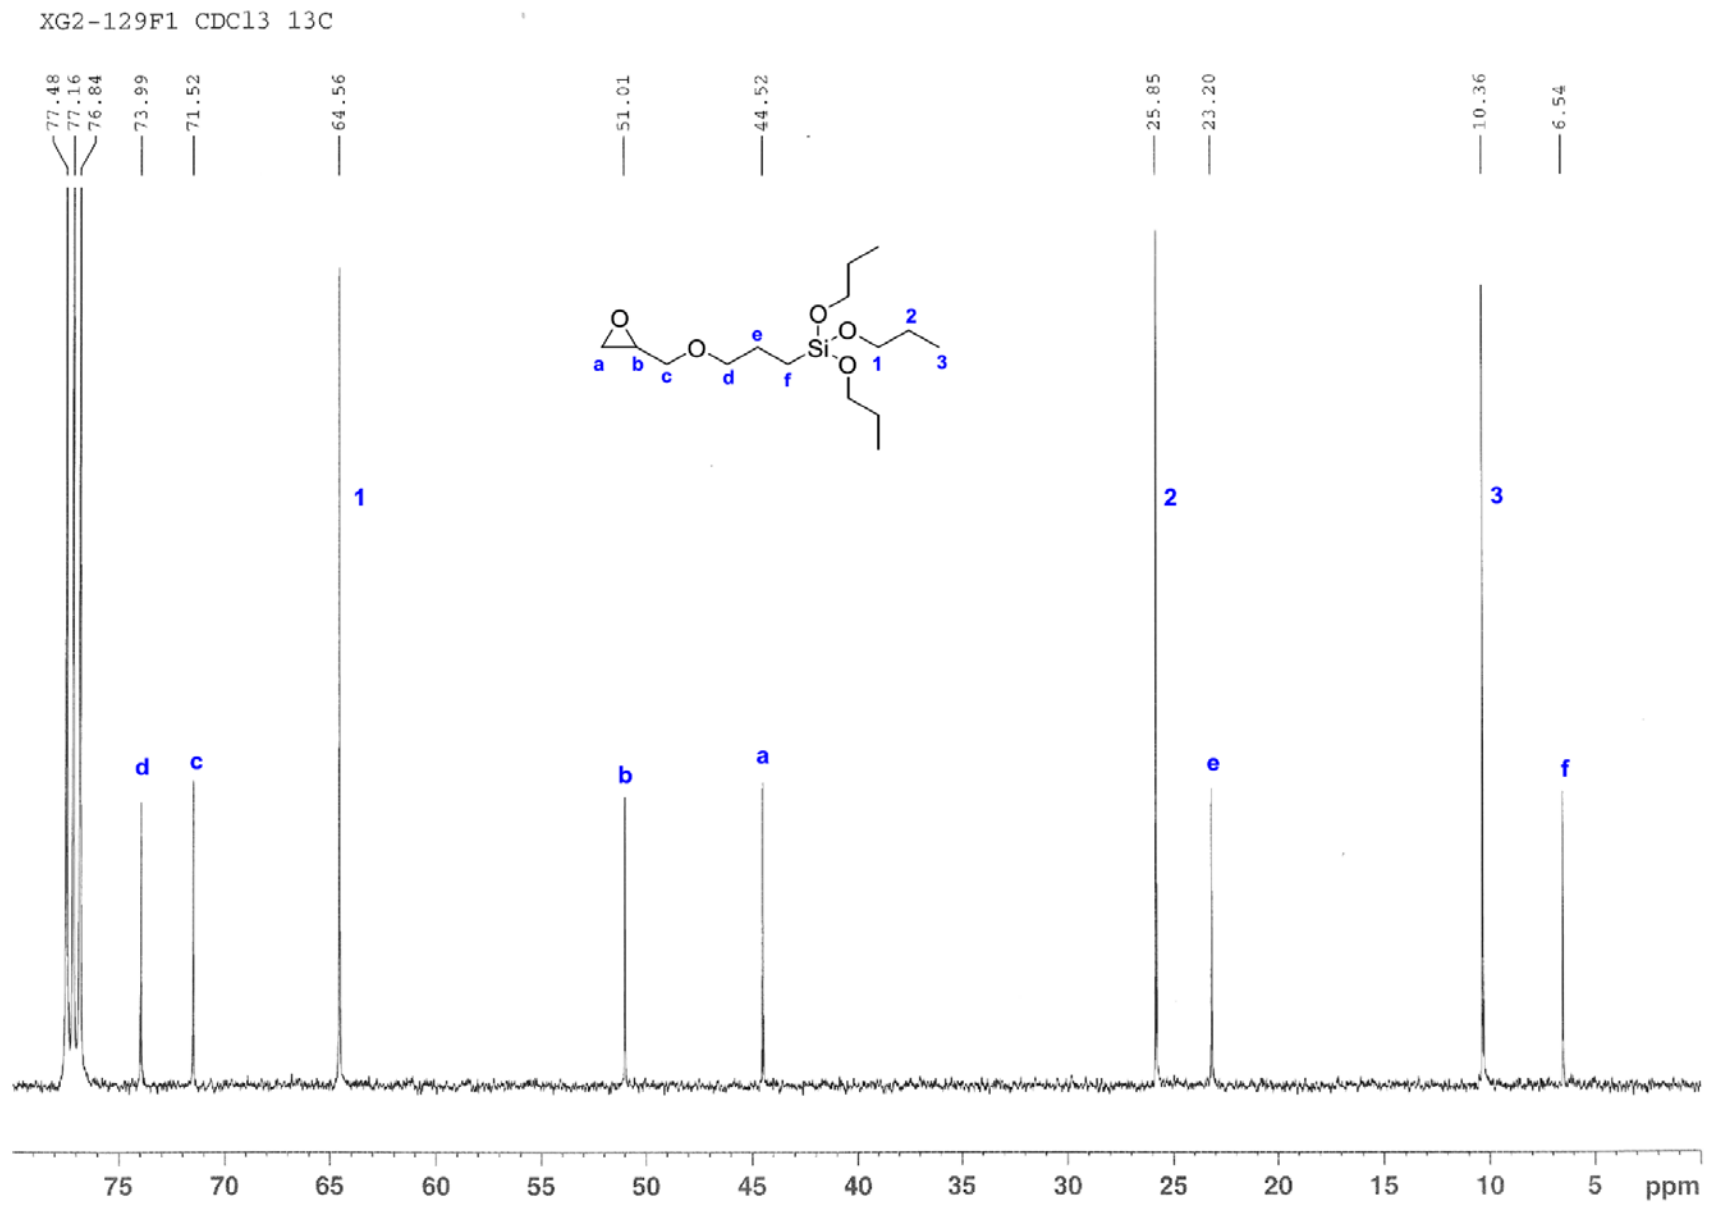Figure SI\_98: <sup>13</sup>C NMR spectrum of compound 13a

SI\_99

XG2-129F1 CDC13 DEPT90

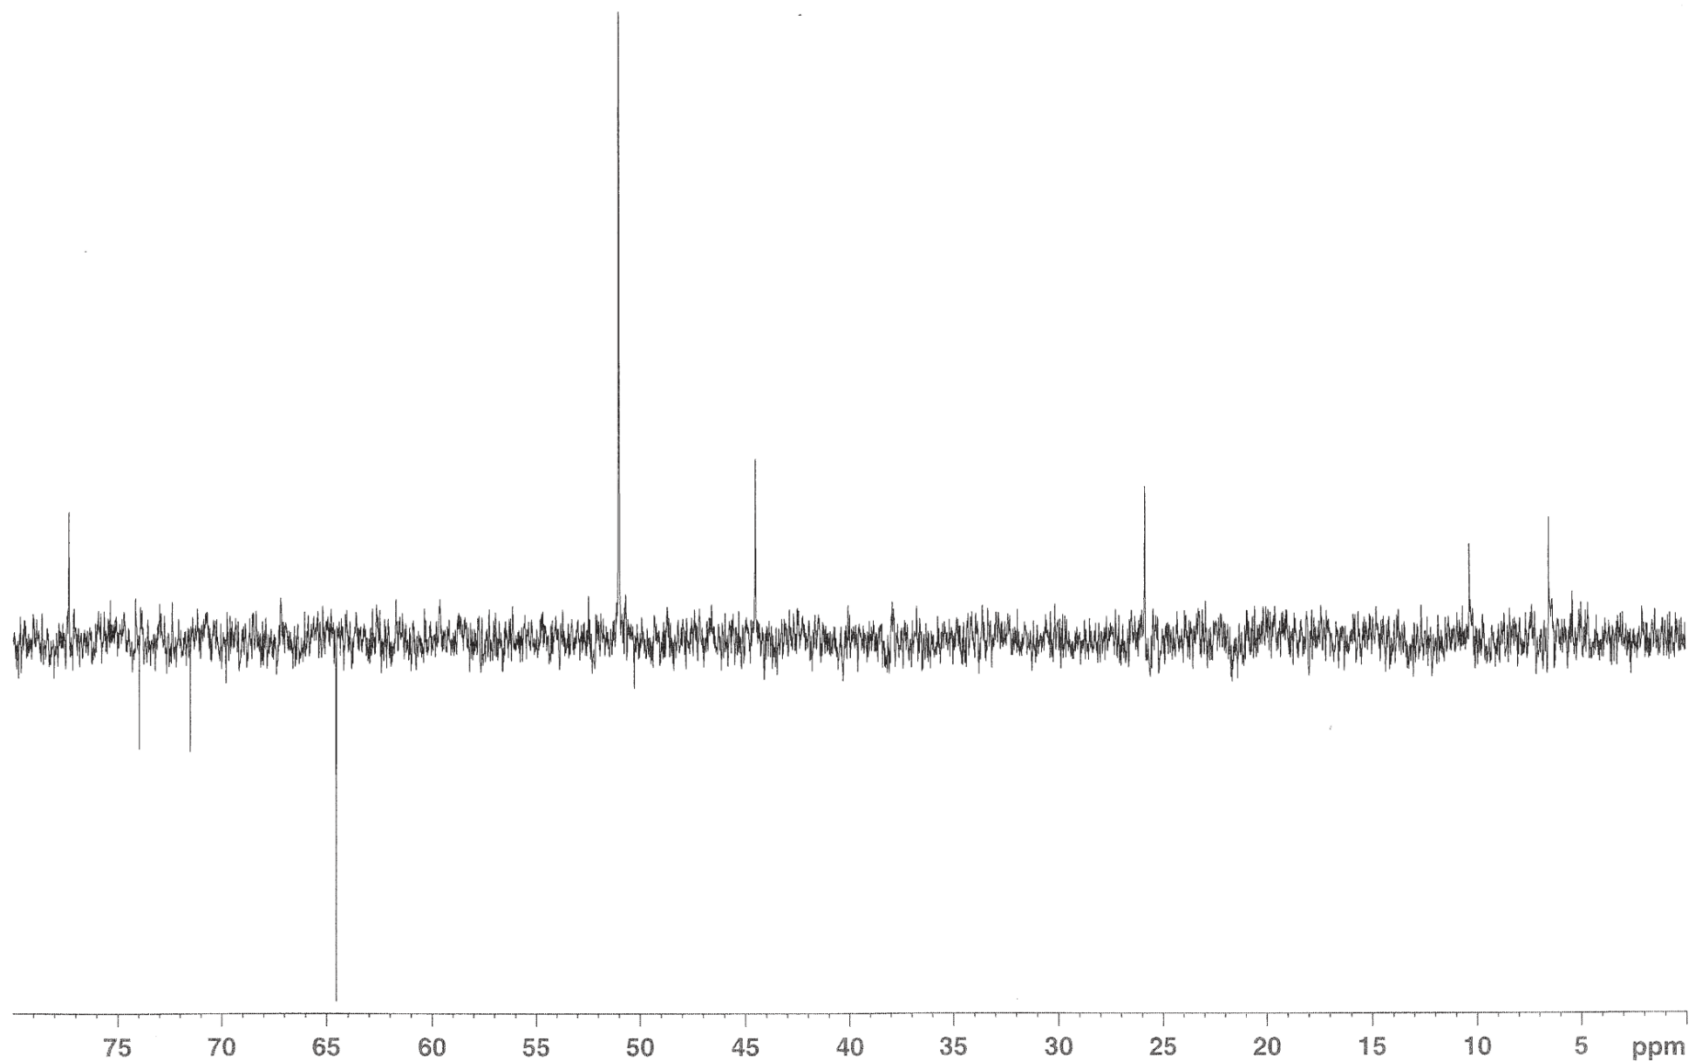

Figure SI\_99: DEPT90 NMR spectrum of compound 13a

# SI\_100

XG2-129F1 CDC13 DEPT135

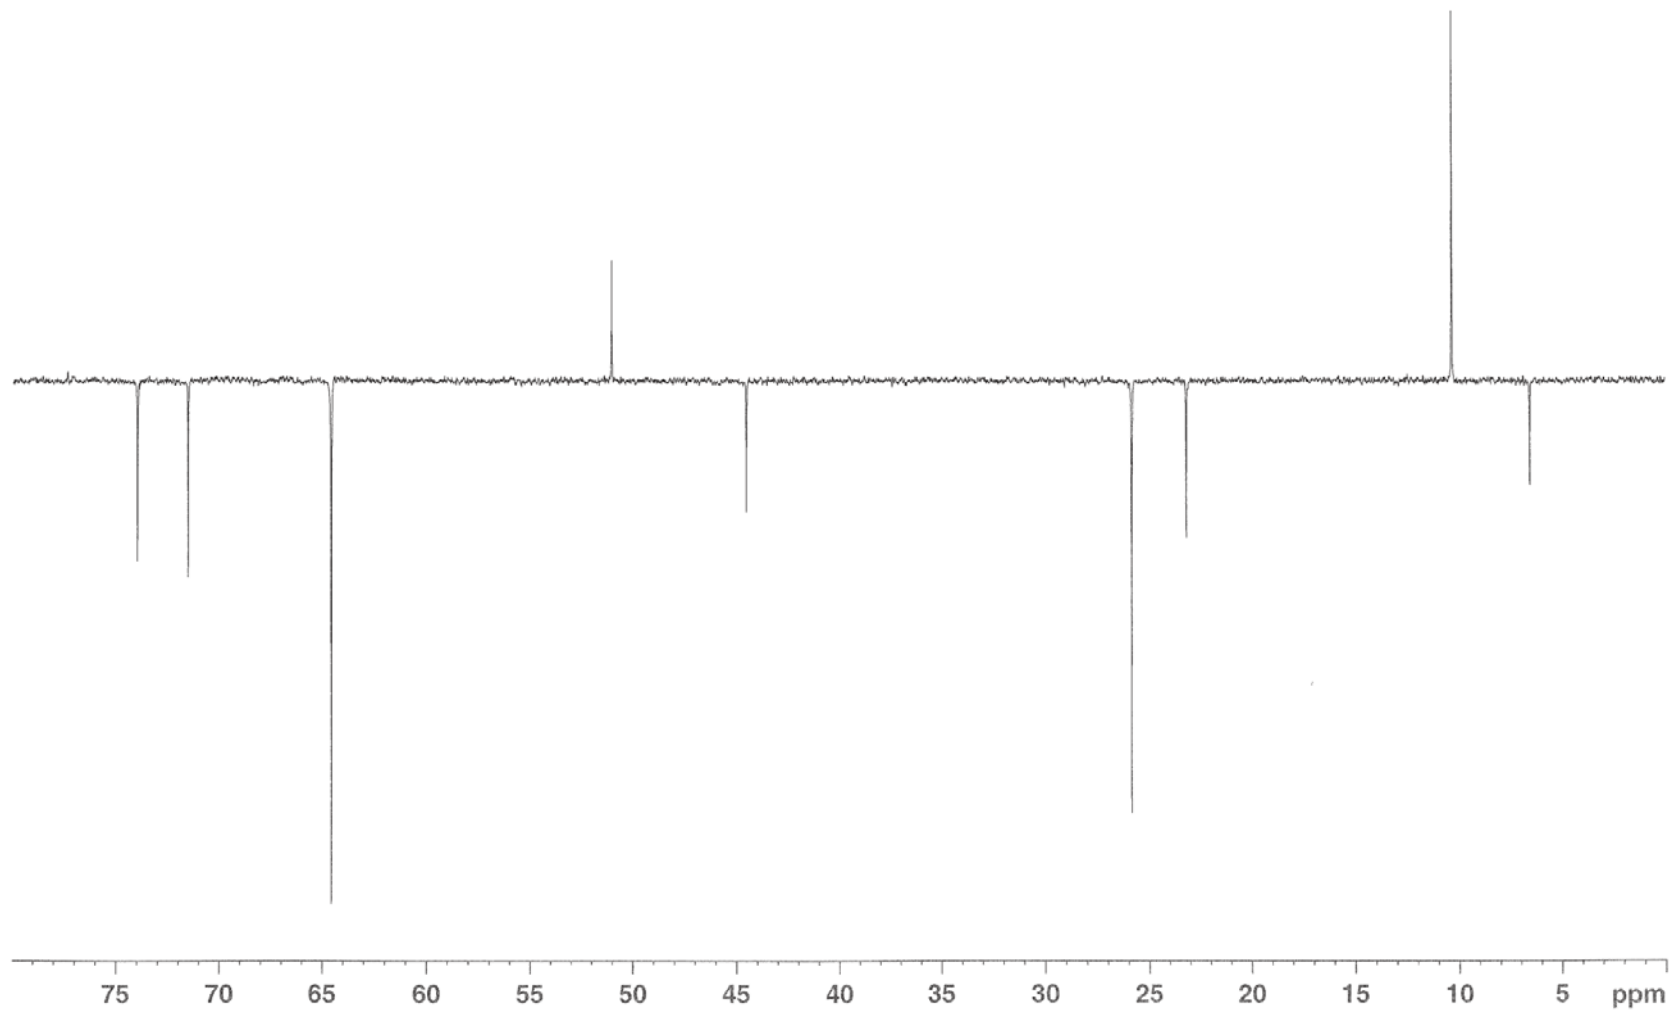

Figure SI\_100: DEPT 135 NMR spectrum of compound 13a



# SI\_101

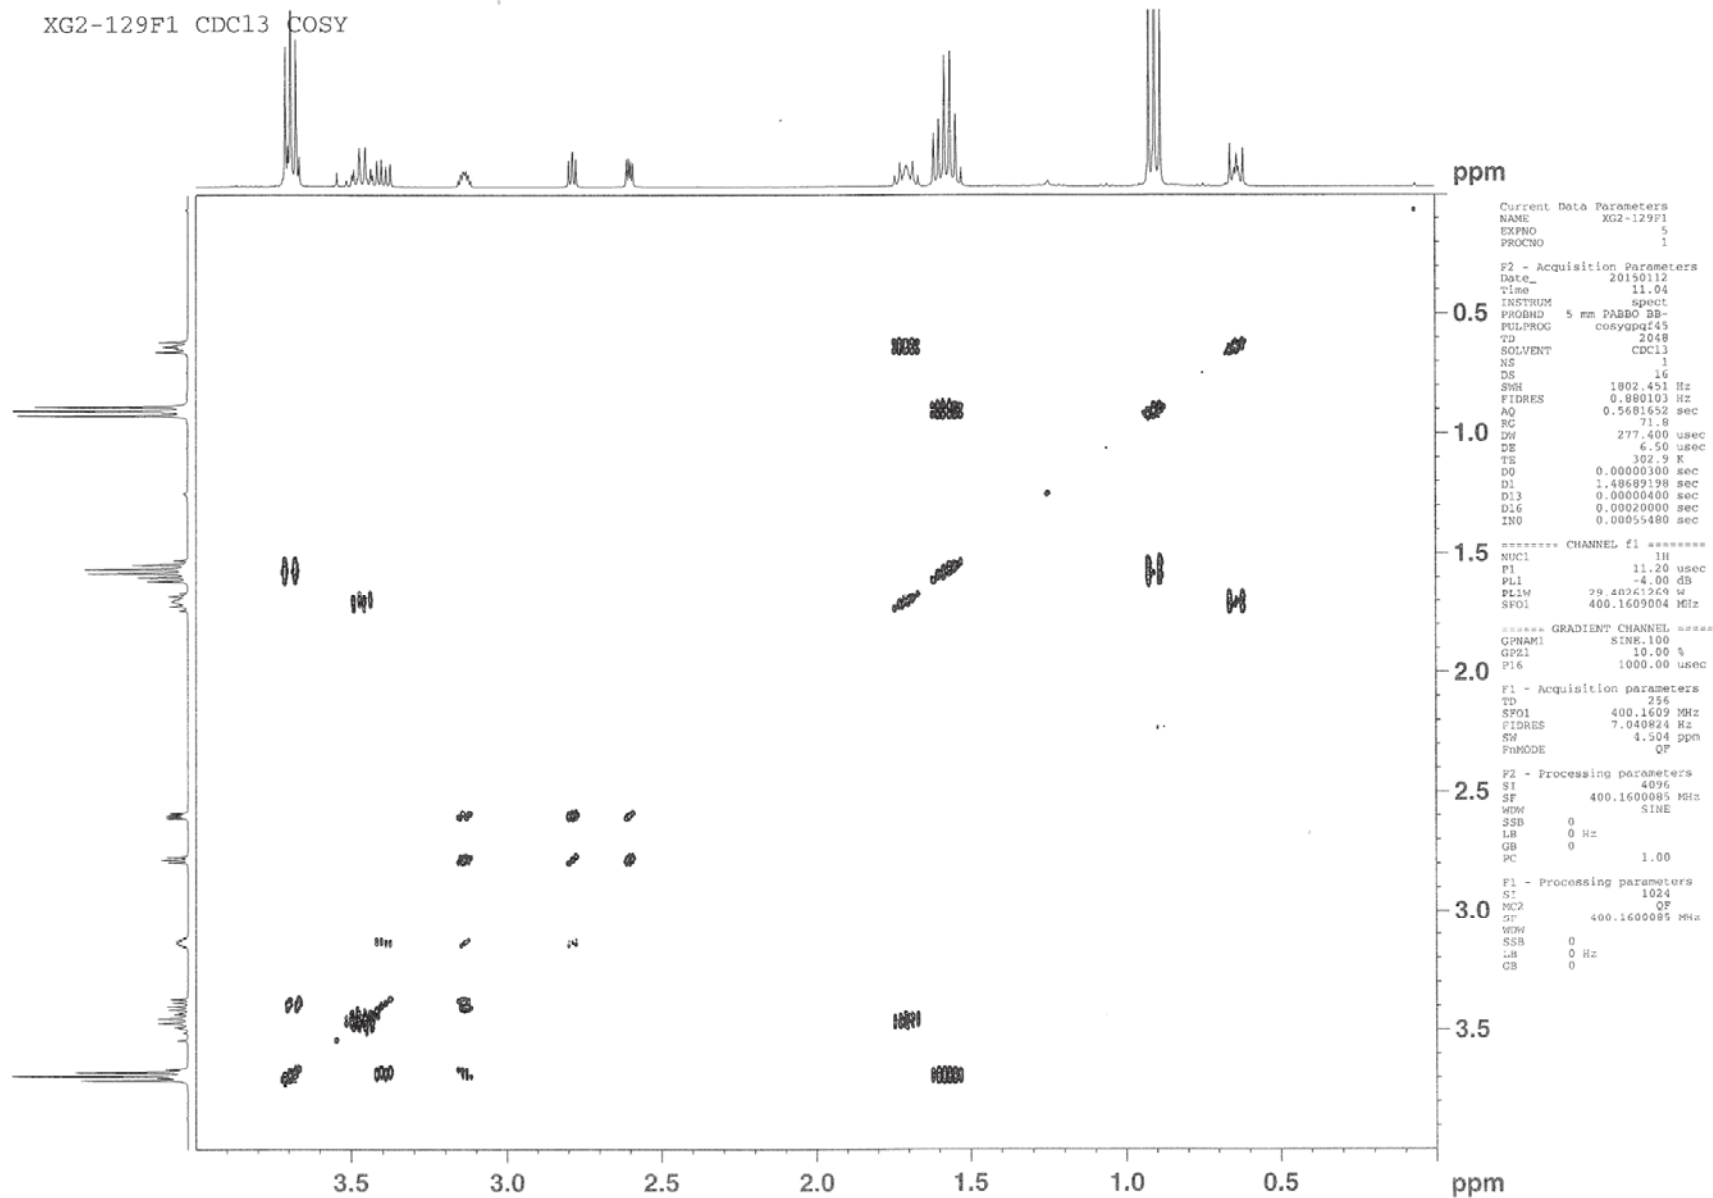

Figure SI\_101:  $^1\text{H}$ - $^1\text{H}$  COSY NMR spectrum of compound 13a

# SI\_102

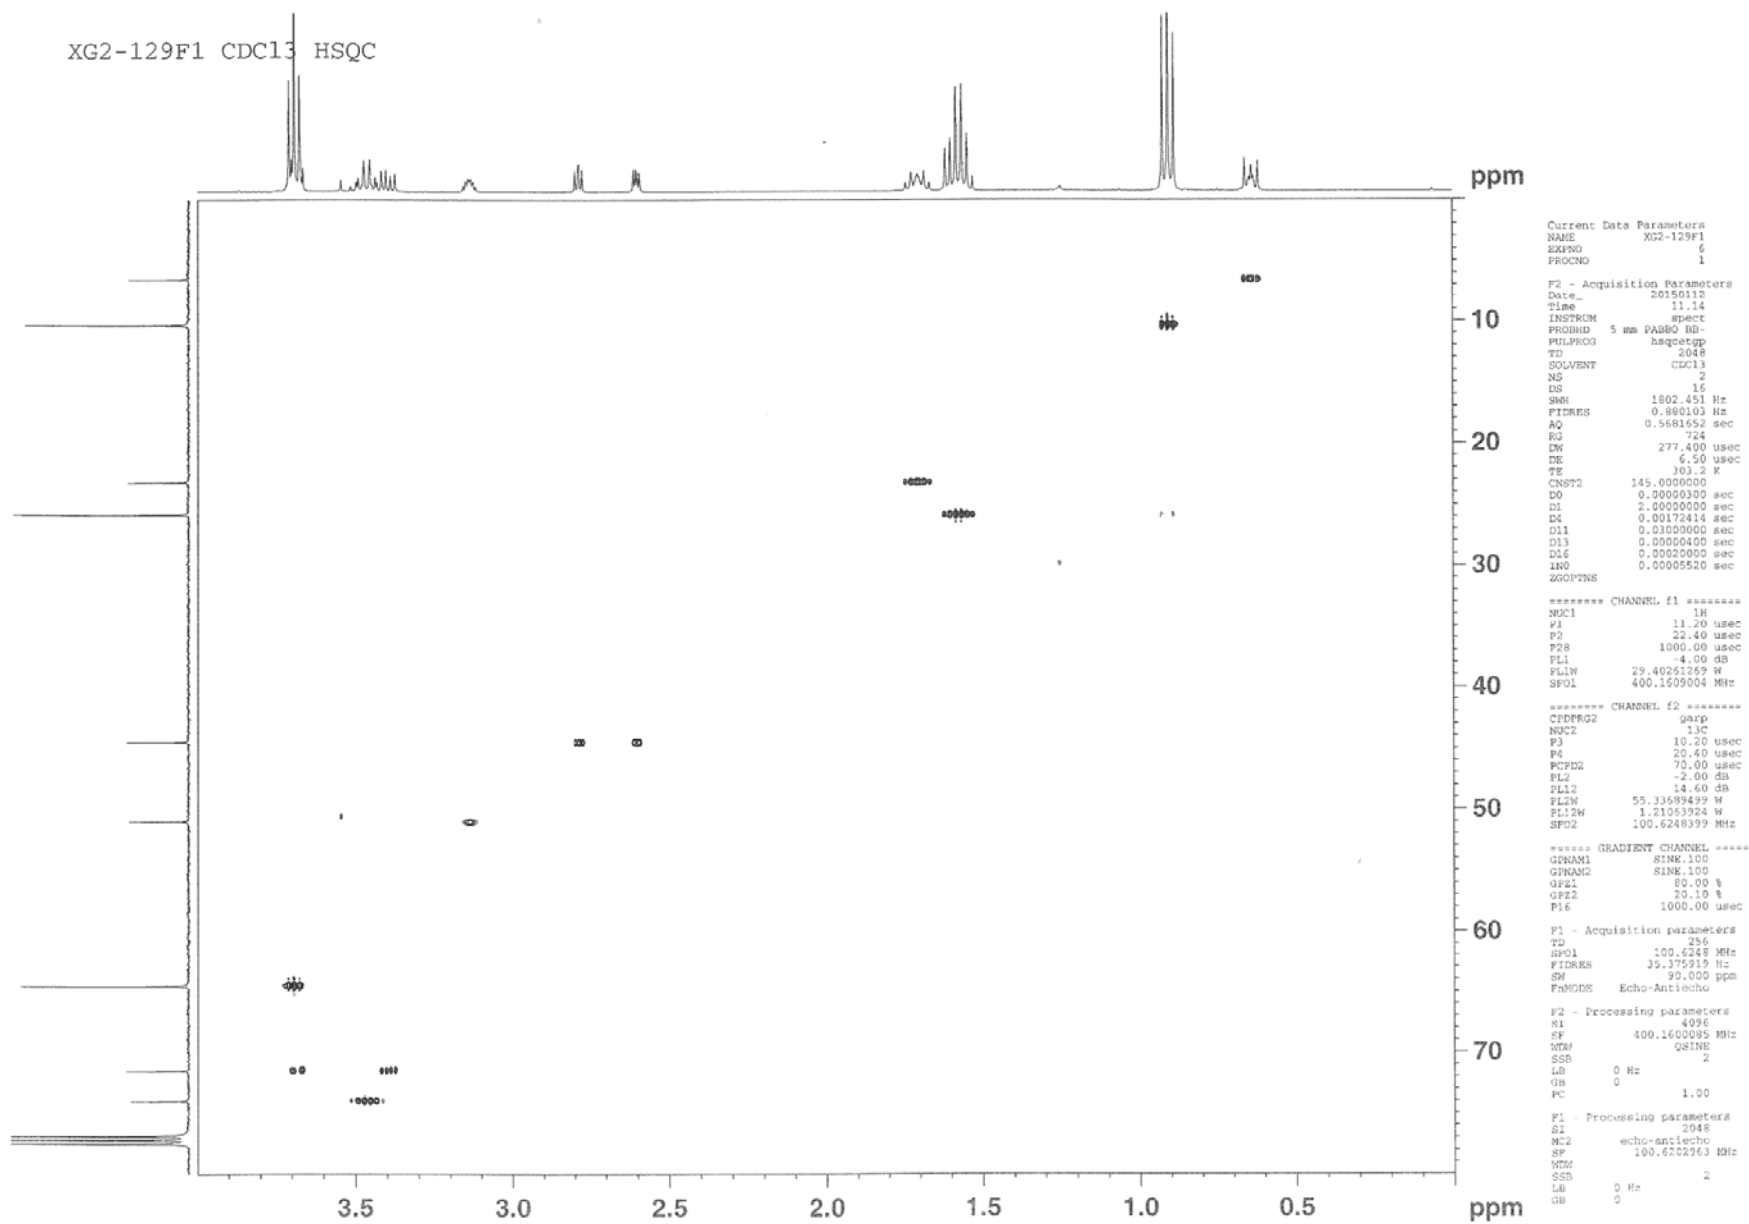

Figure SI\_102: HSQC NMR spectrum of compound 13a

# SI\_103

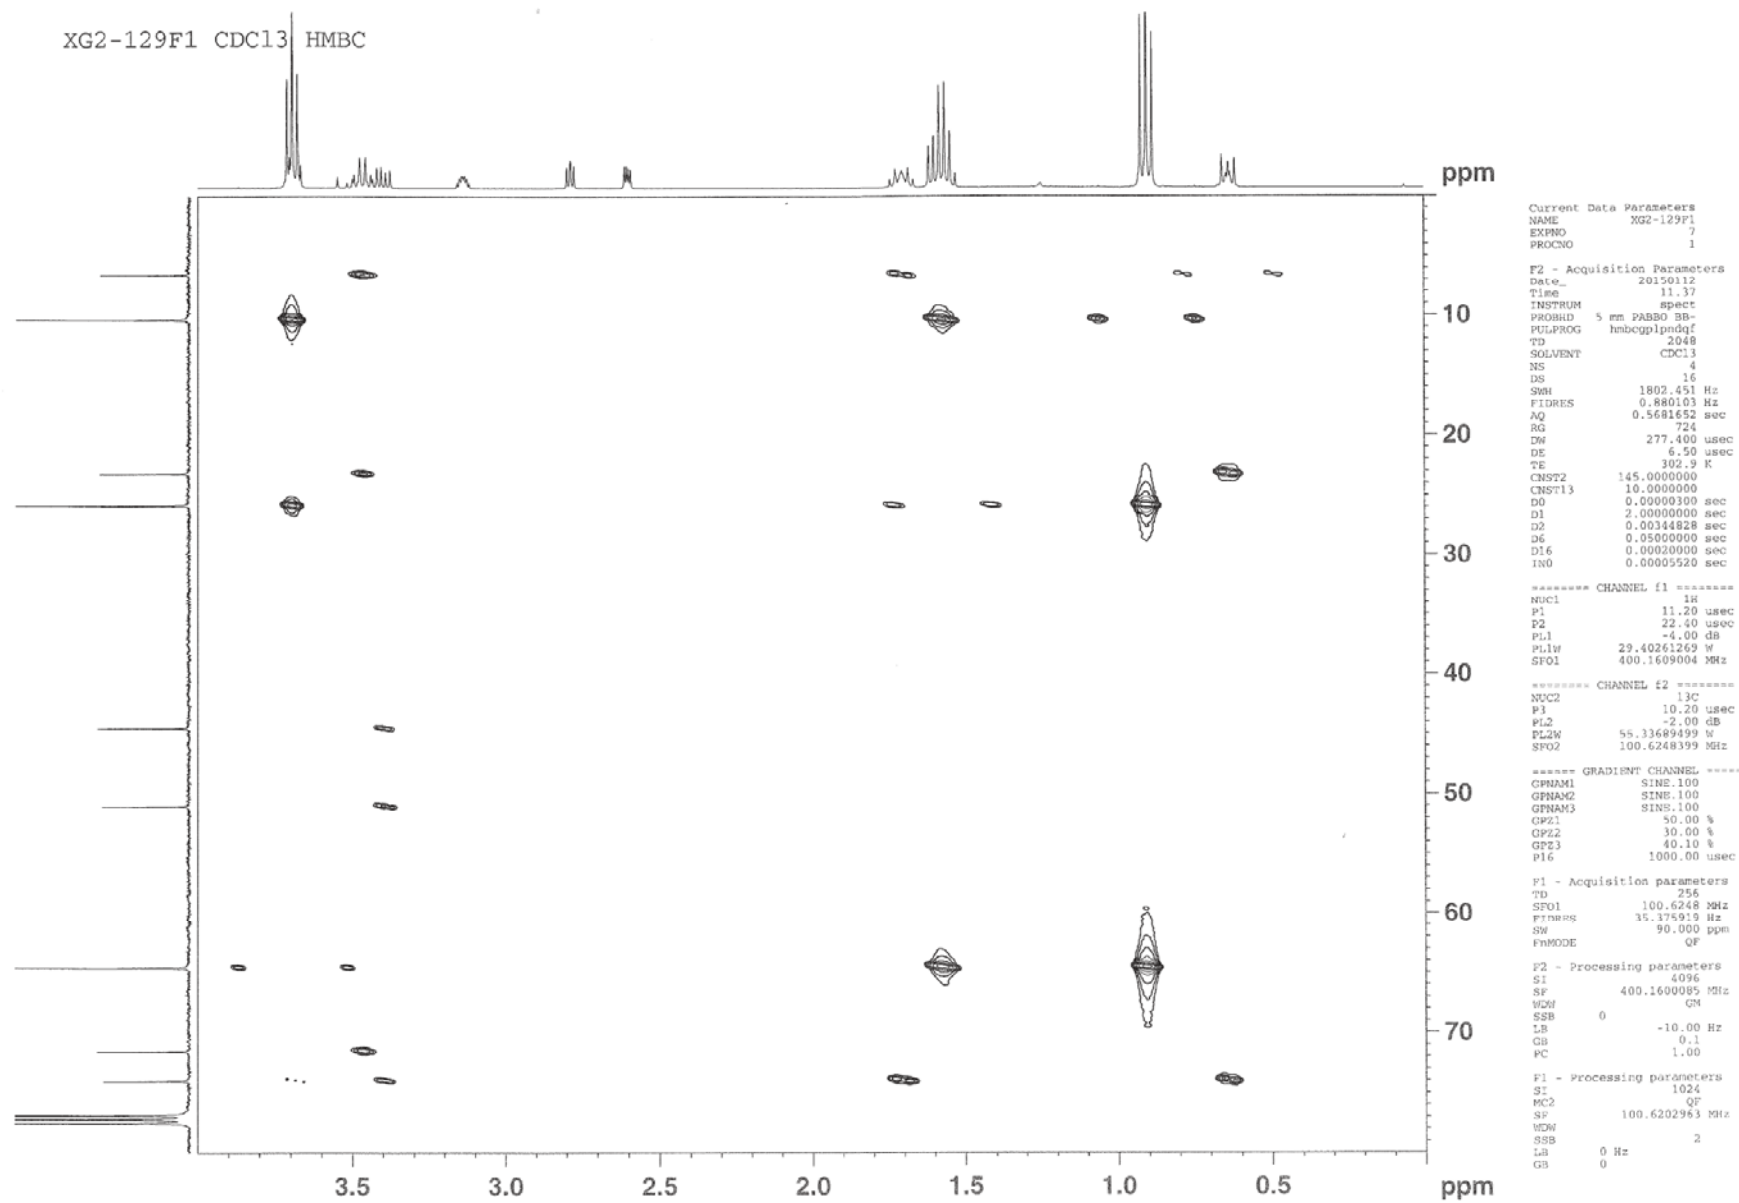

Figure SI\_103: HMBC NMR spectrum of compound 13a

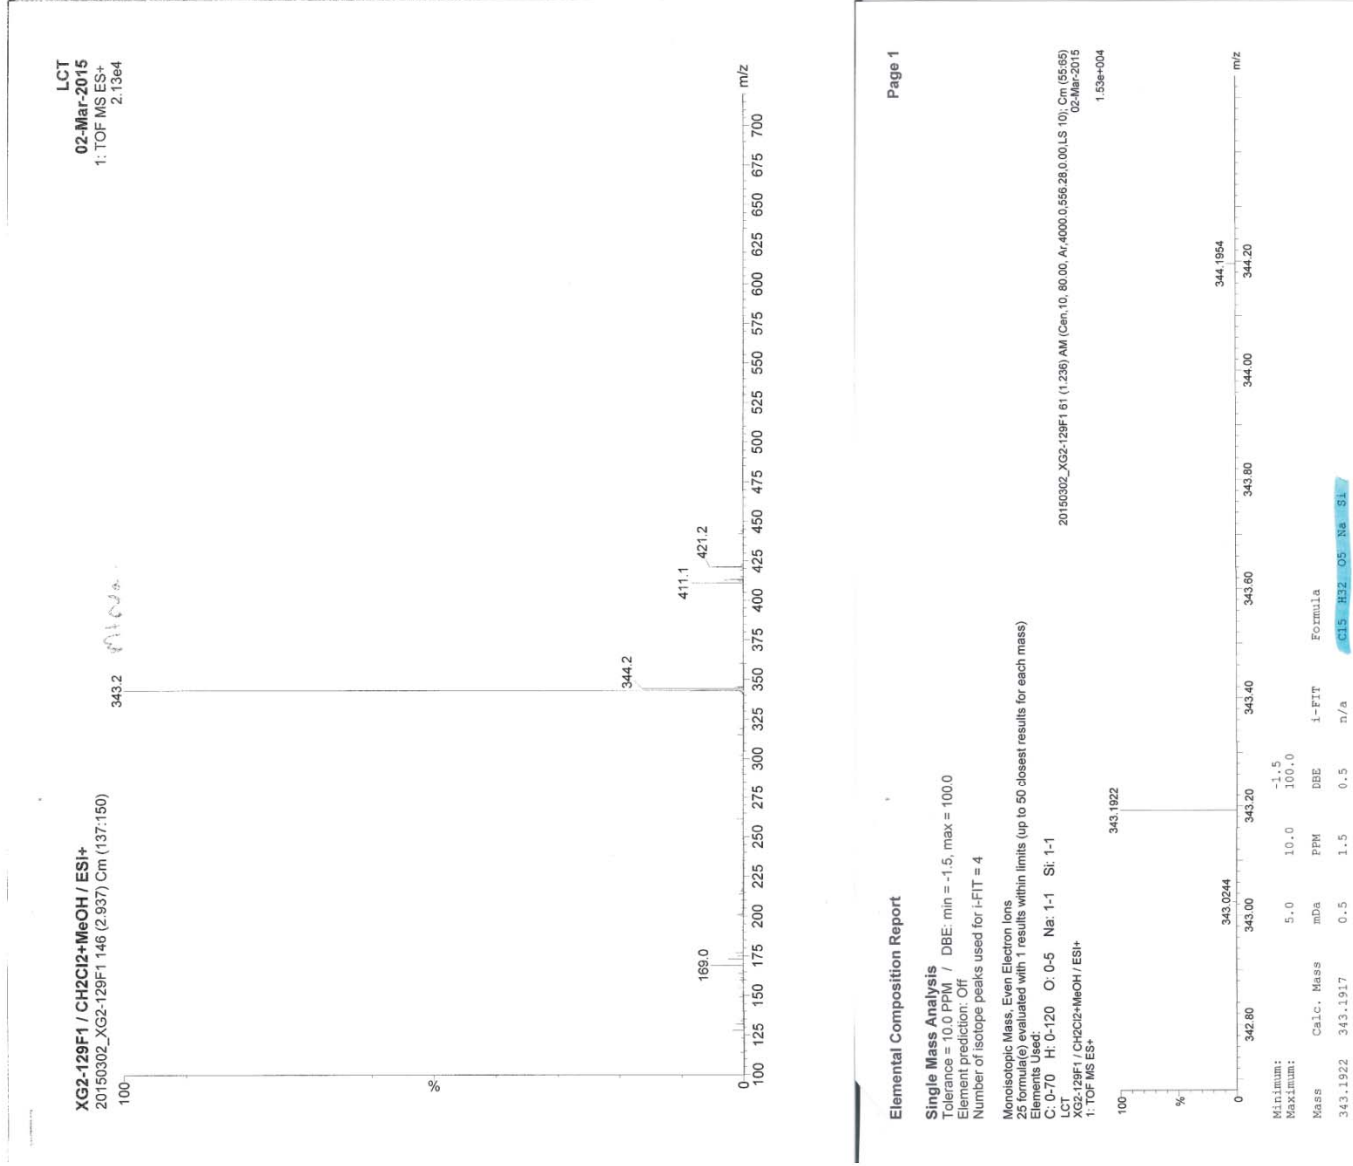

Figure SI\_104: ESI HRMS spectrum of compound 13a

SI\_105

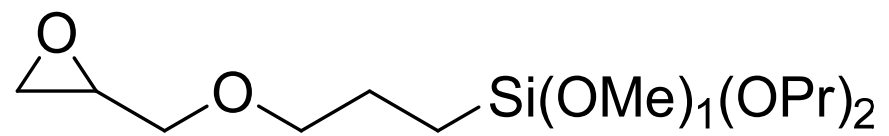

**13b**

# SI\_106

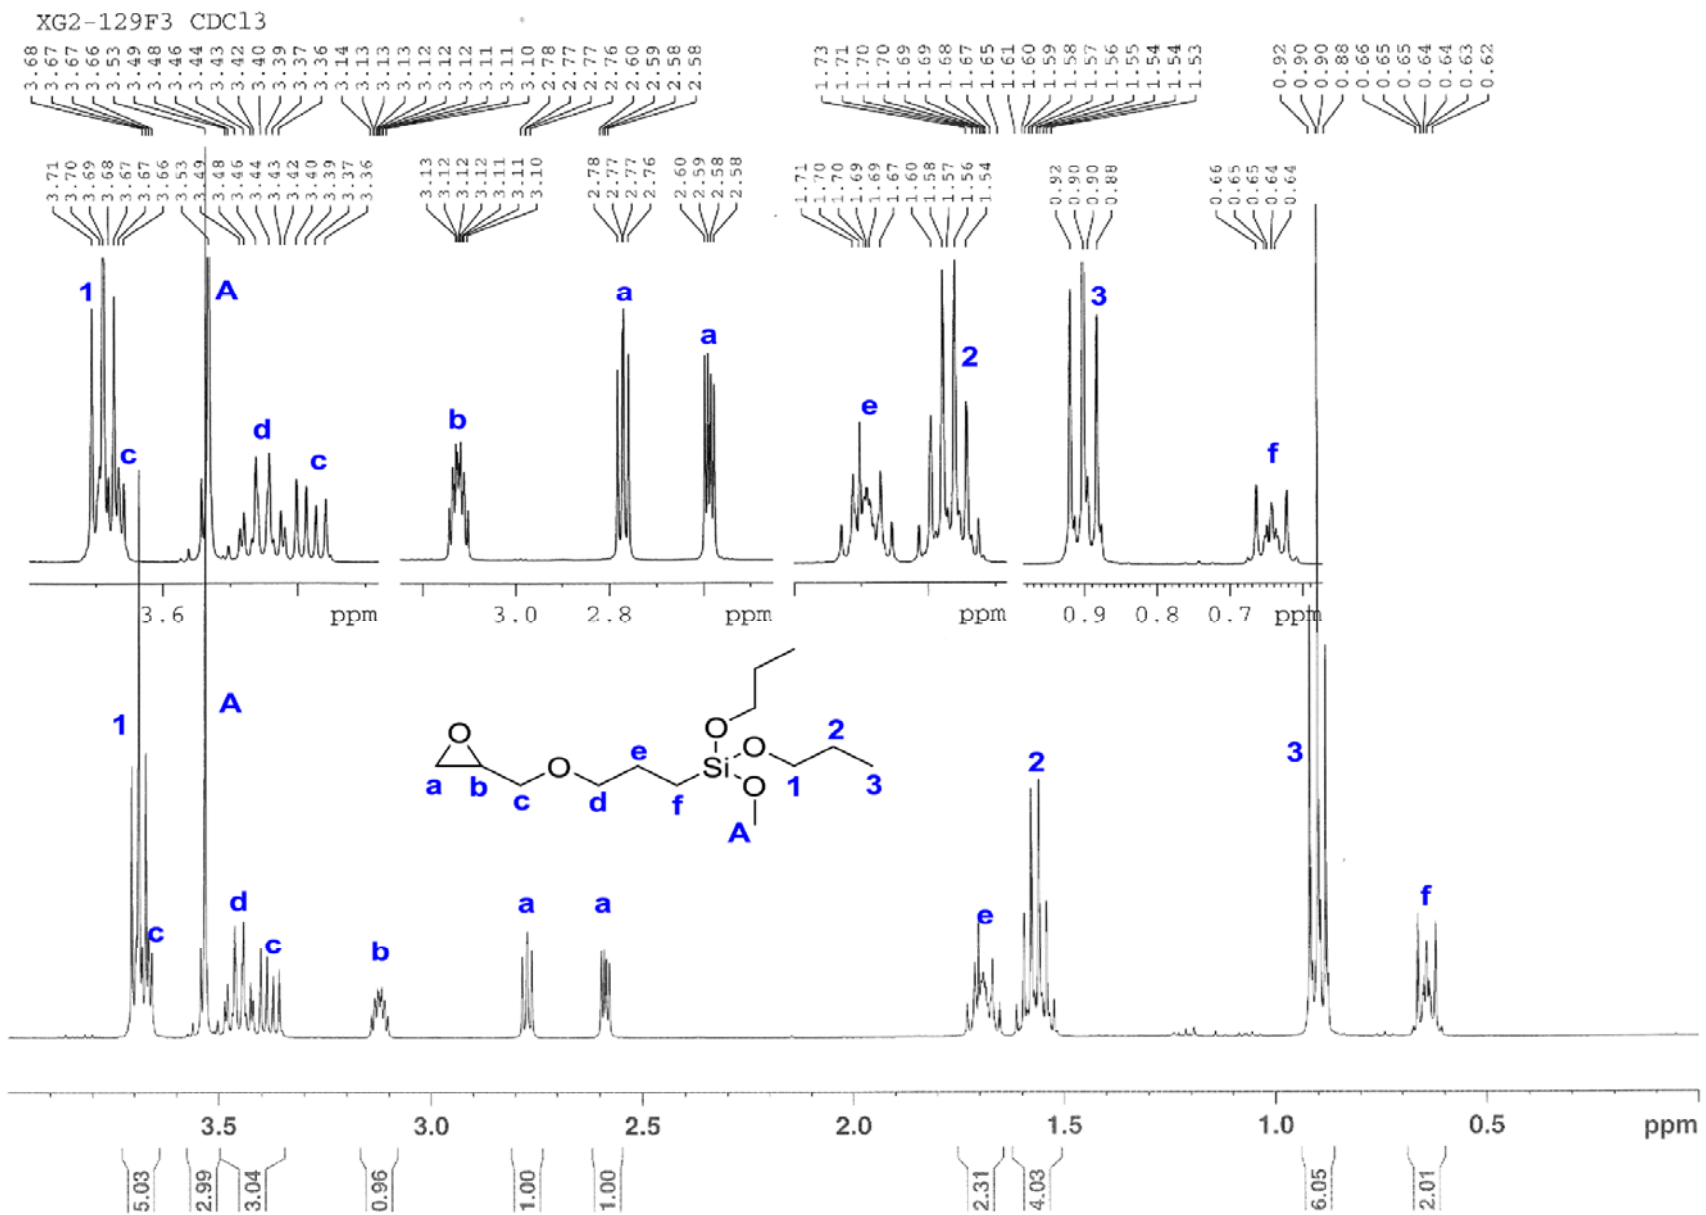

Figure SI\_106:  $^1\text{H}$  NMR spectrum of compound 13b

# SI\_107

XG2-129F3 CDC13 13C

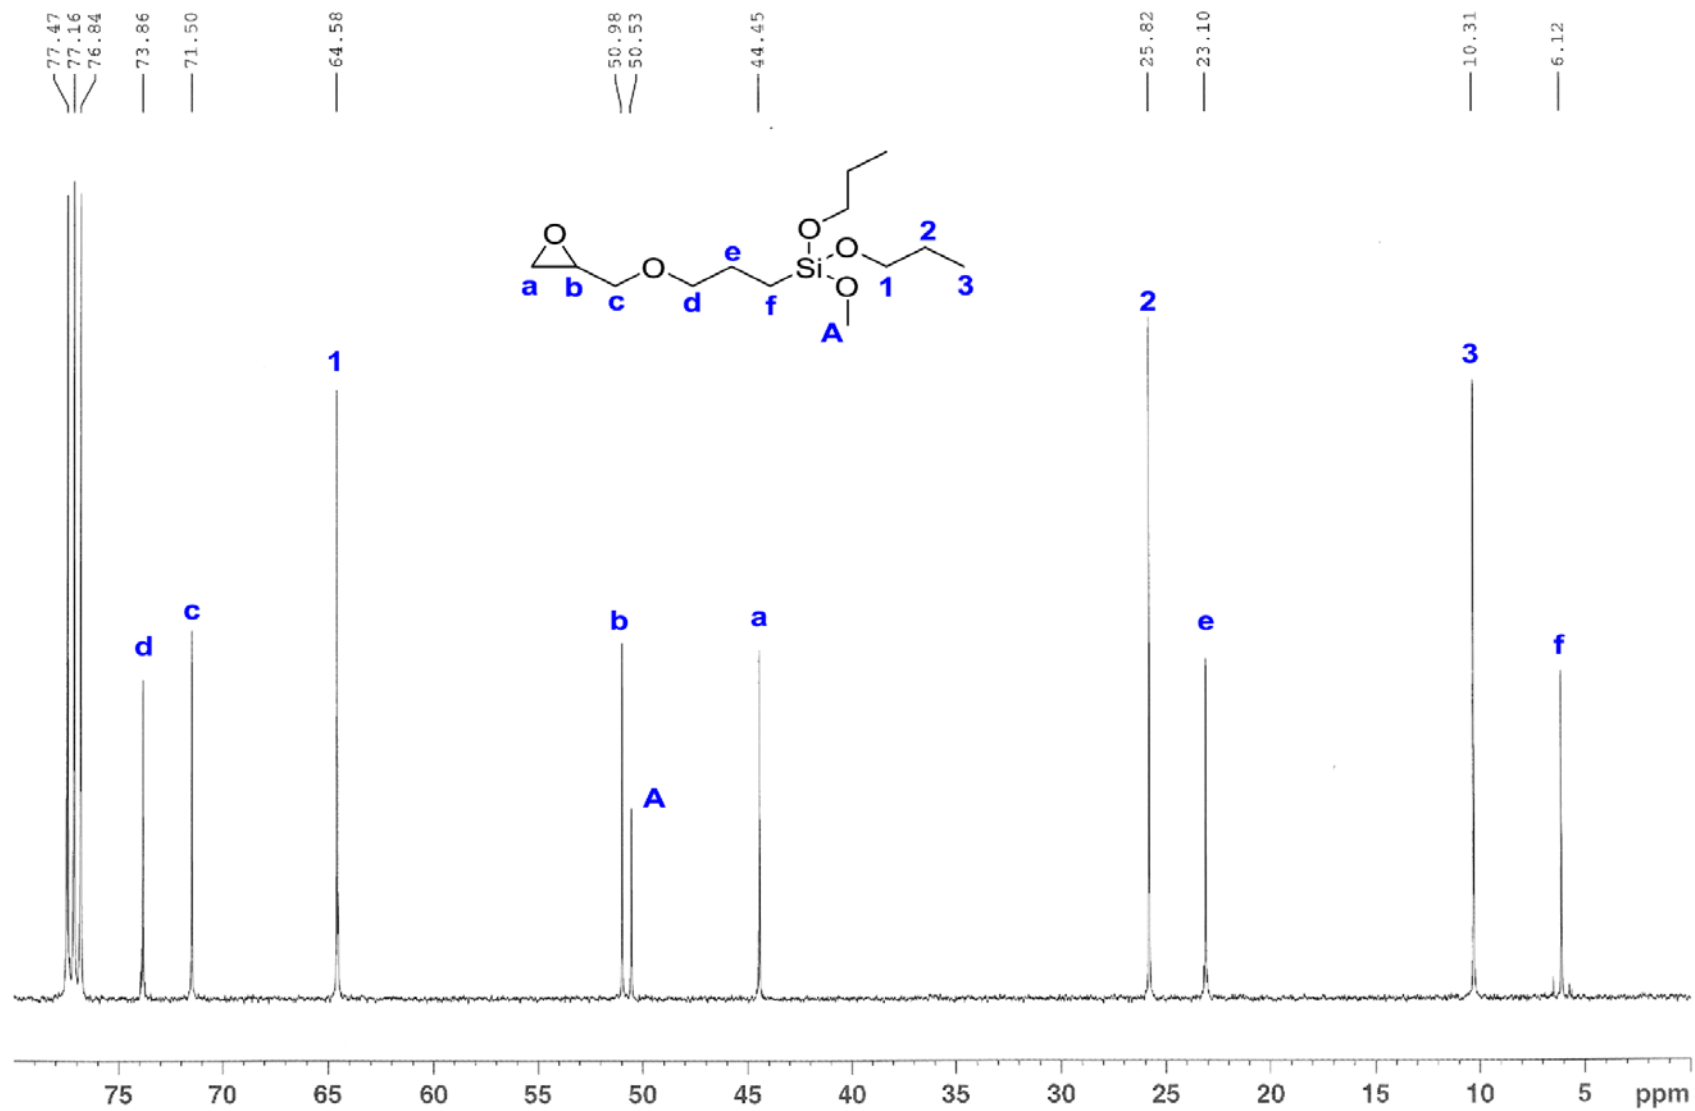

Figure SI\_107: <sup>13</sup>C NMR spectrum of compound 13b

# SI\_108

XG2-129F3 CDCl3 DEPT135

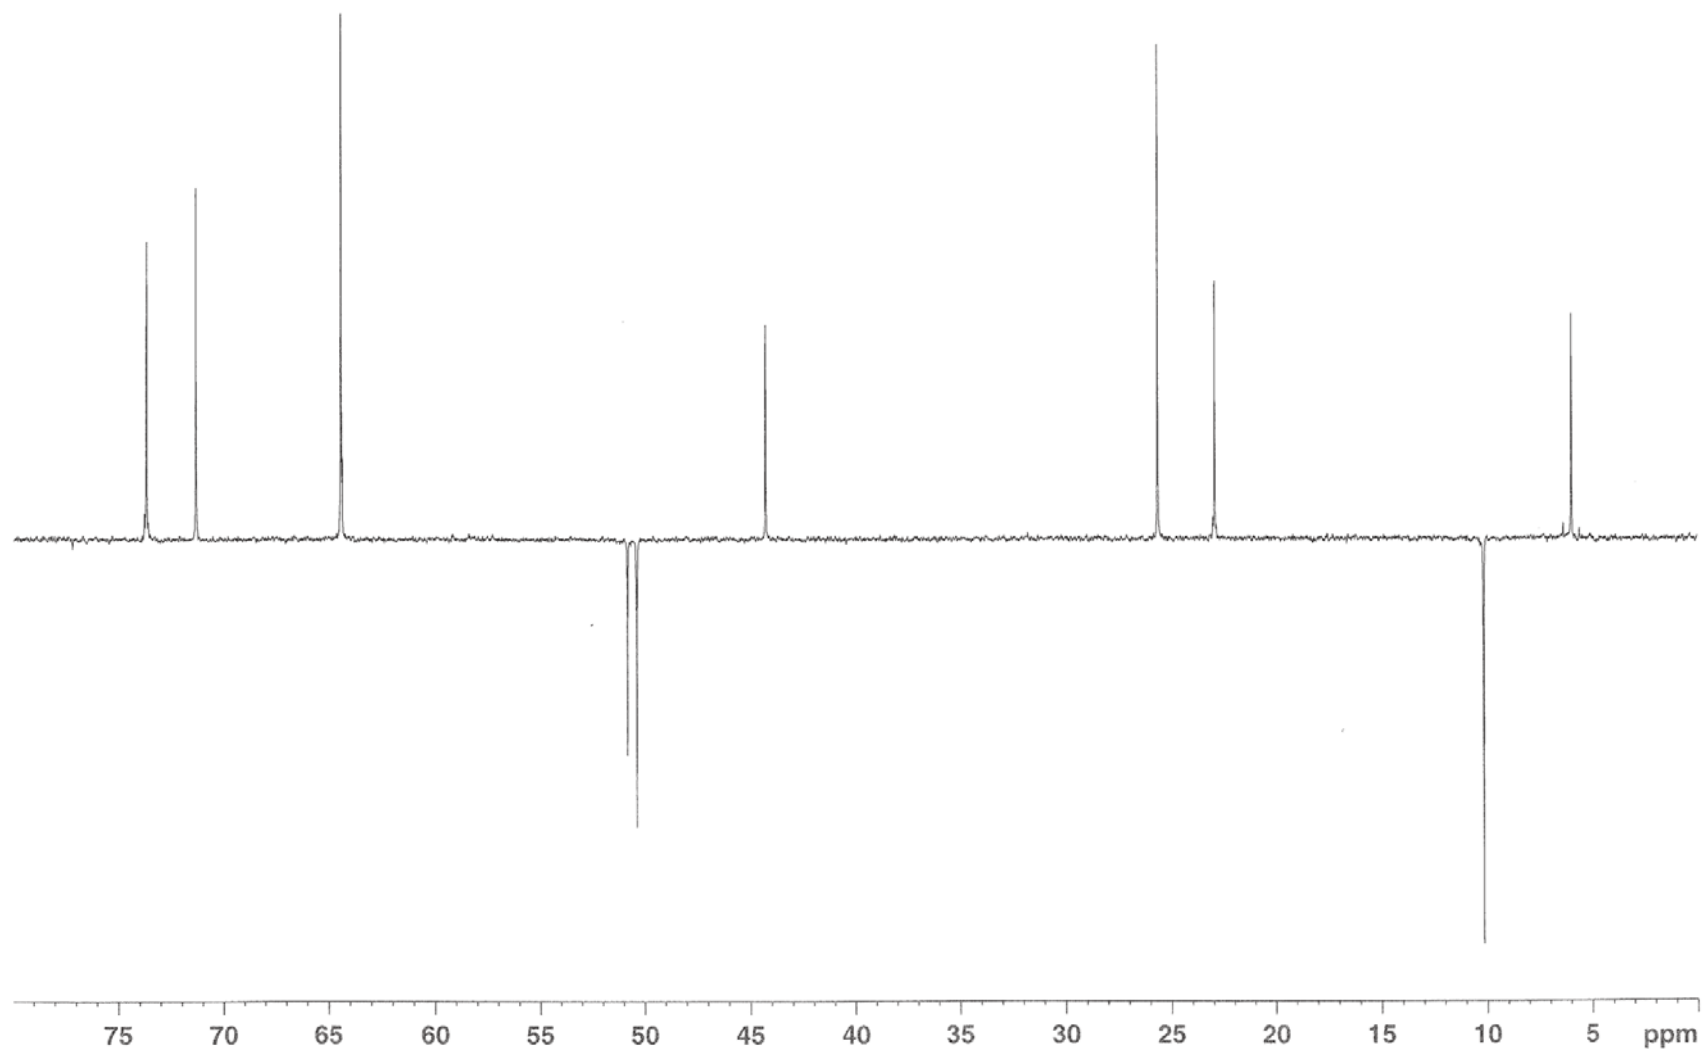

Figure SI\_108: DEPT135 NMR spectrum of compound 13b



# SI\_109

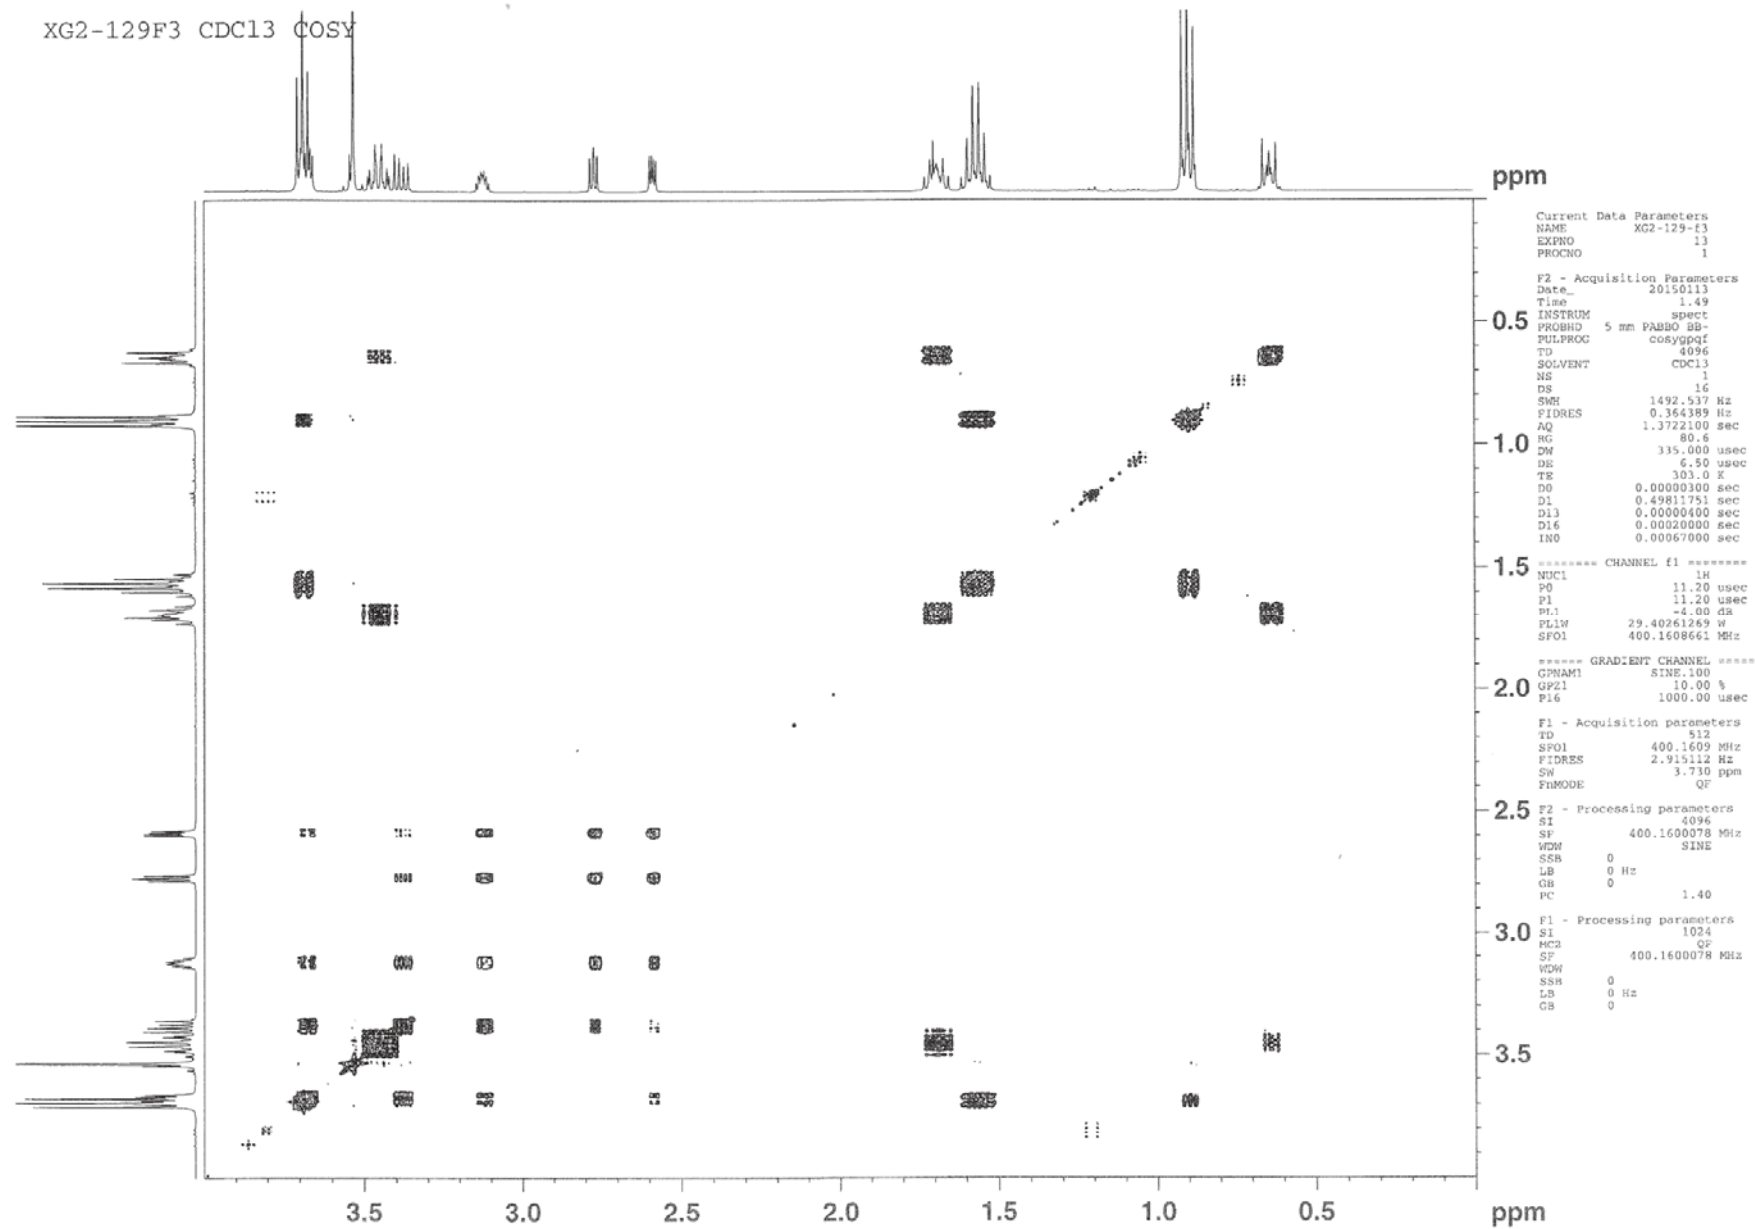

Figure SI\_109:  $^1\text{H}$ - $^1\text{H}$  COSY NMR spectrum of compound 13b

# SI\_110

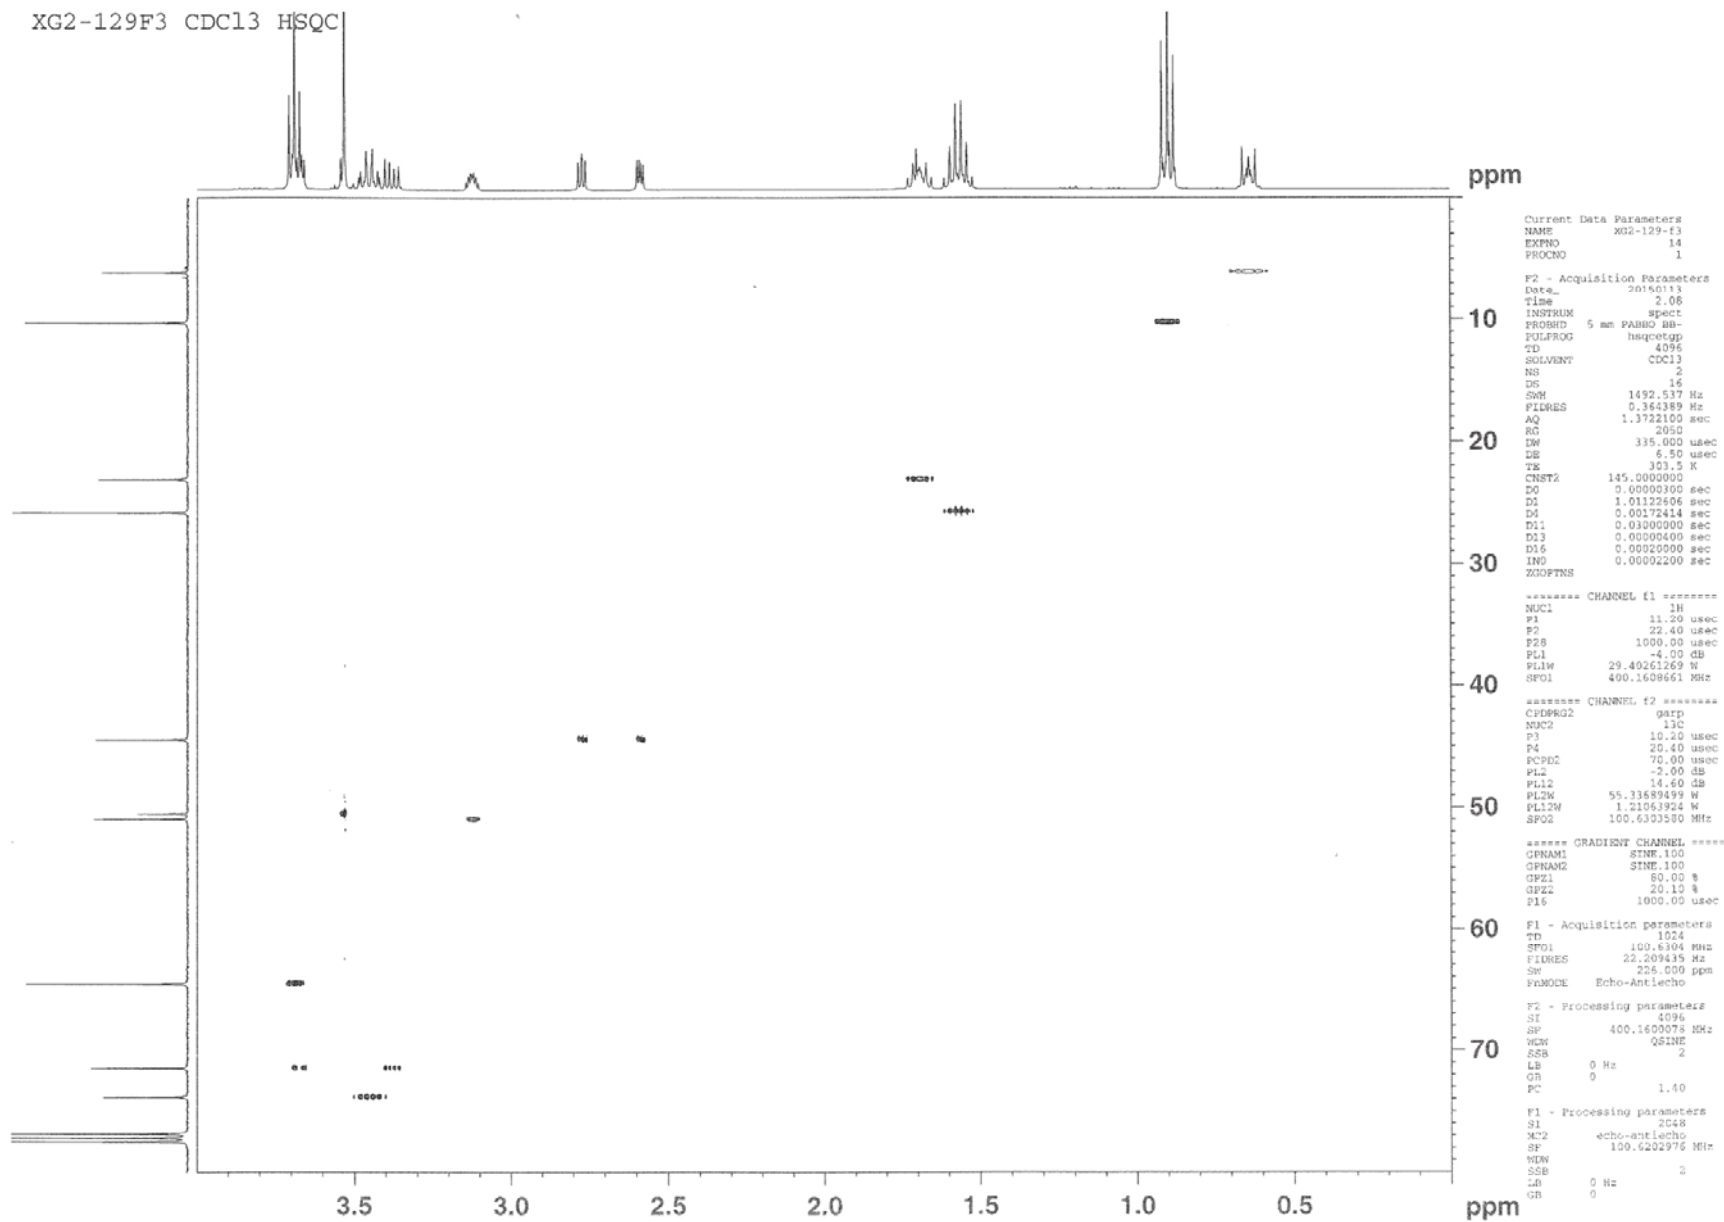

Figure SI\_110: HSQC NMR spectrum of compound 13b

# SI\_111

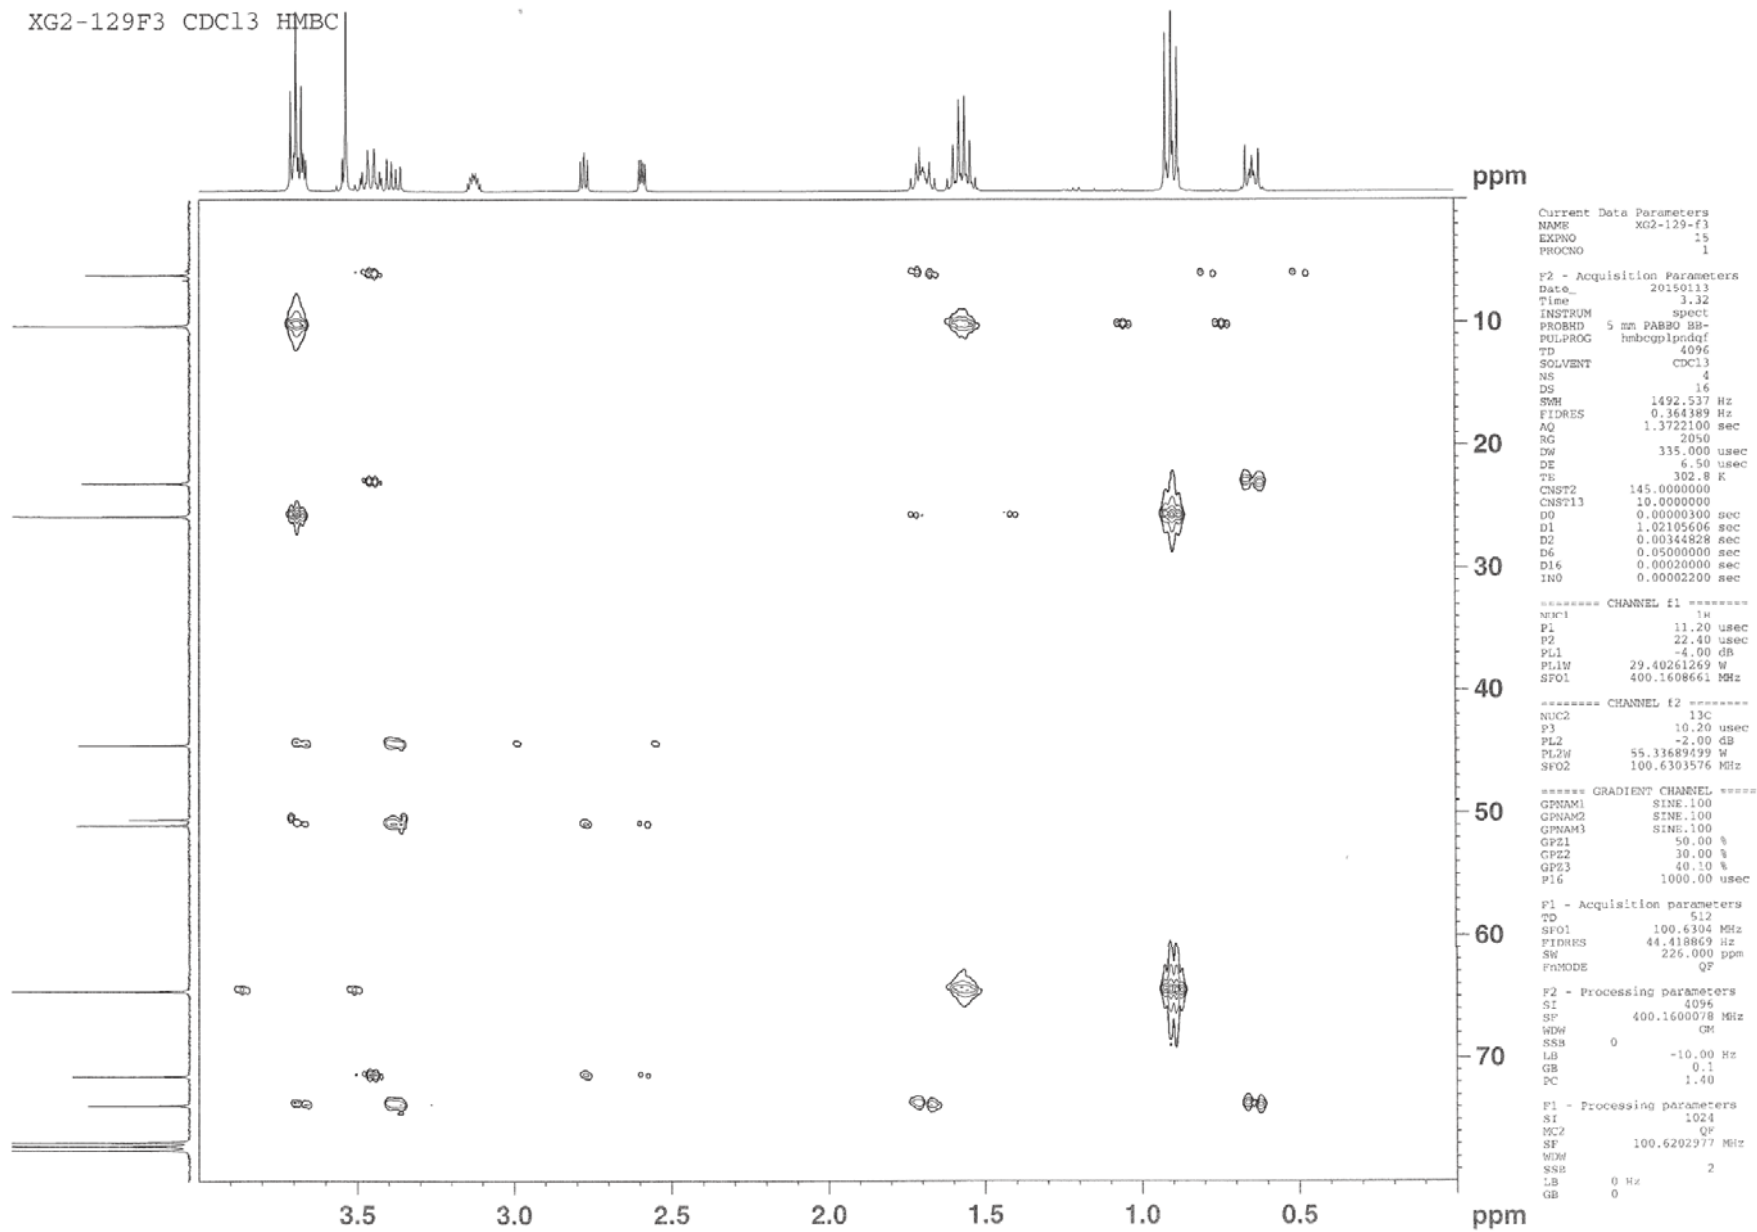

Figure SI\_111: HMBC NMR spectrum of compound 13b

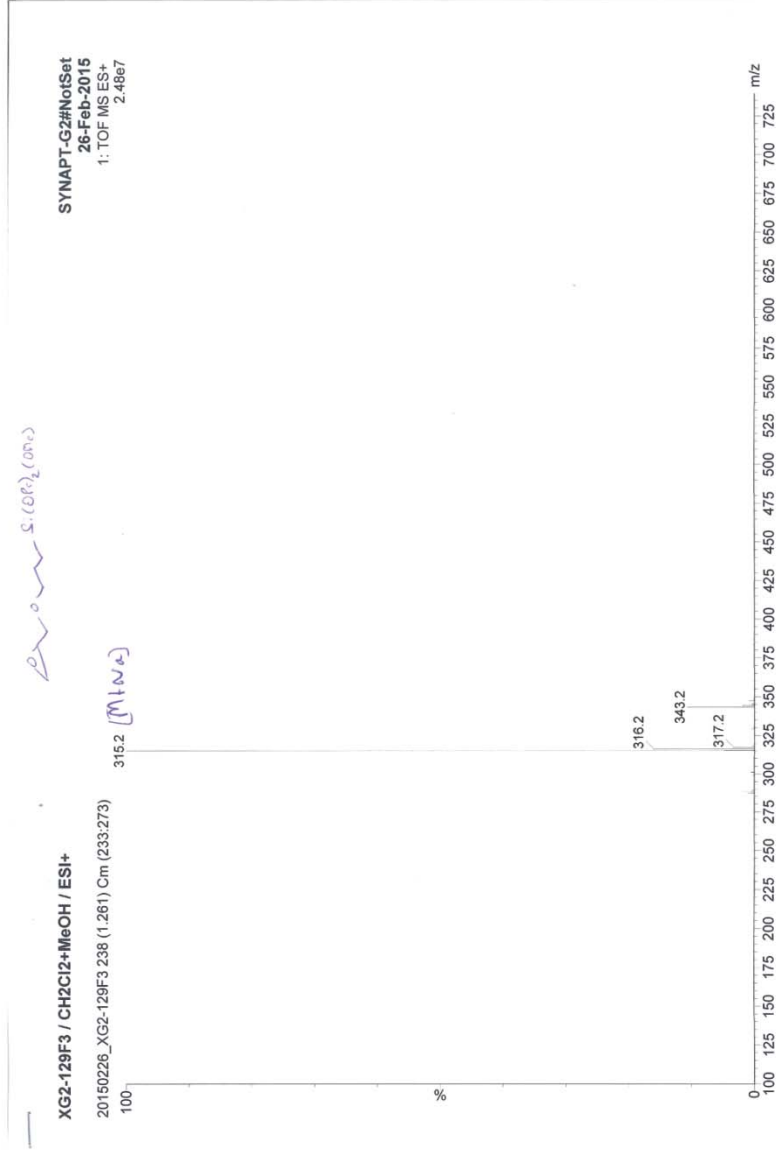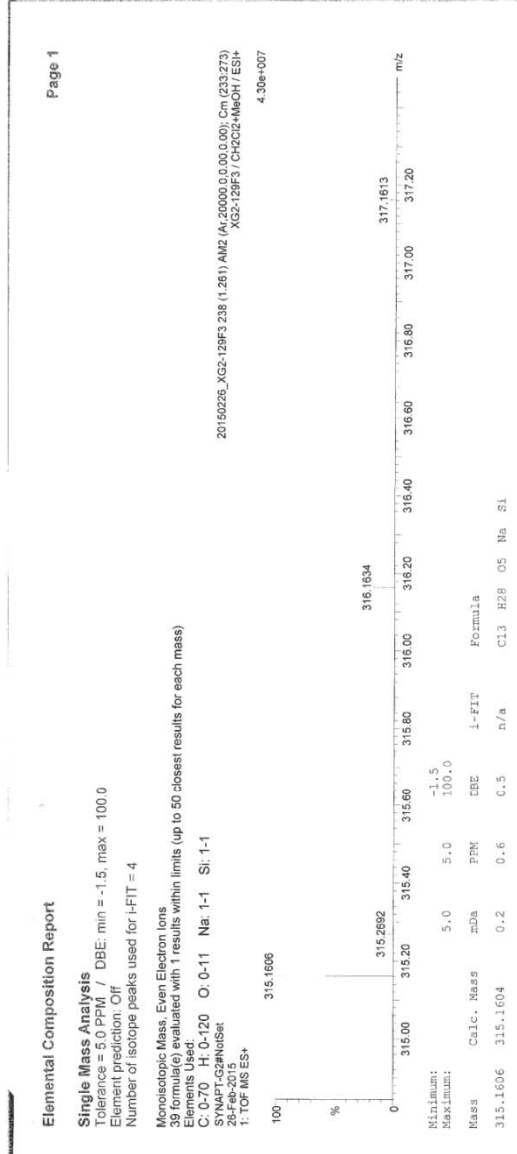

Figure SI\_112: ESI-HRMS spectrum of compound 13b

SI\_113

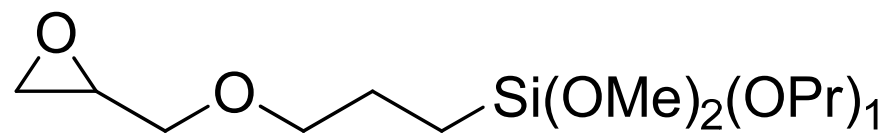

**13c**

# SI\_114

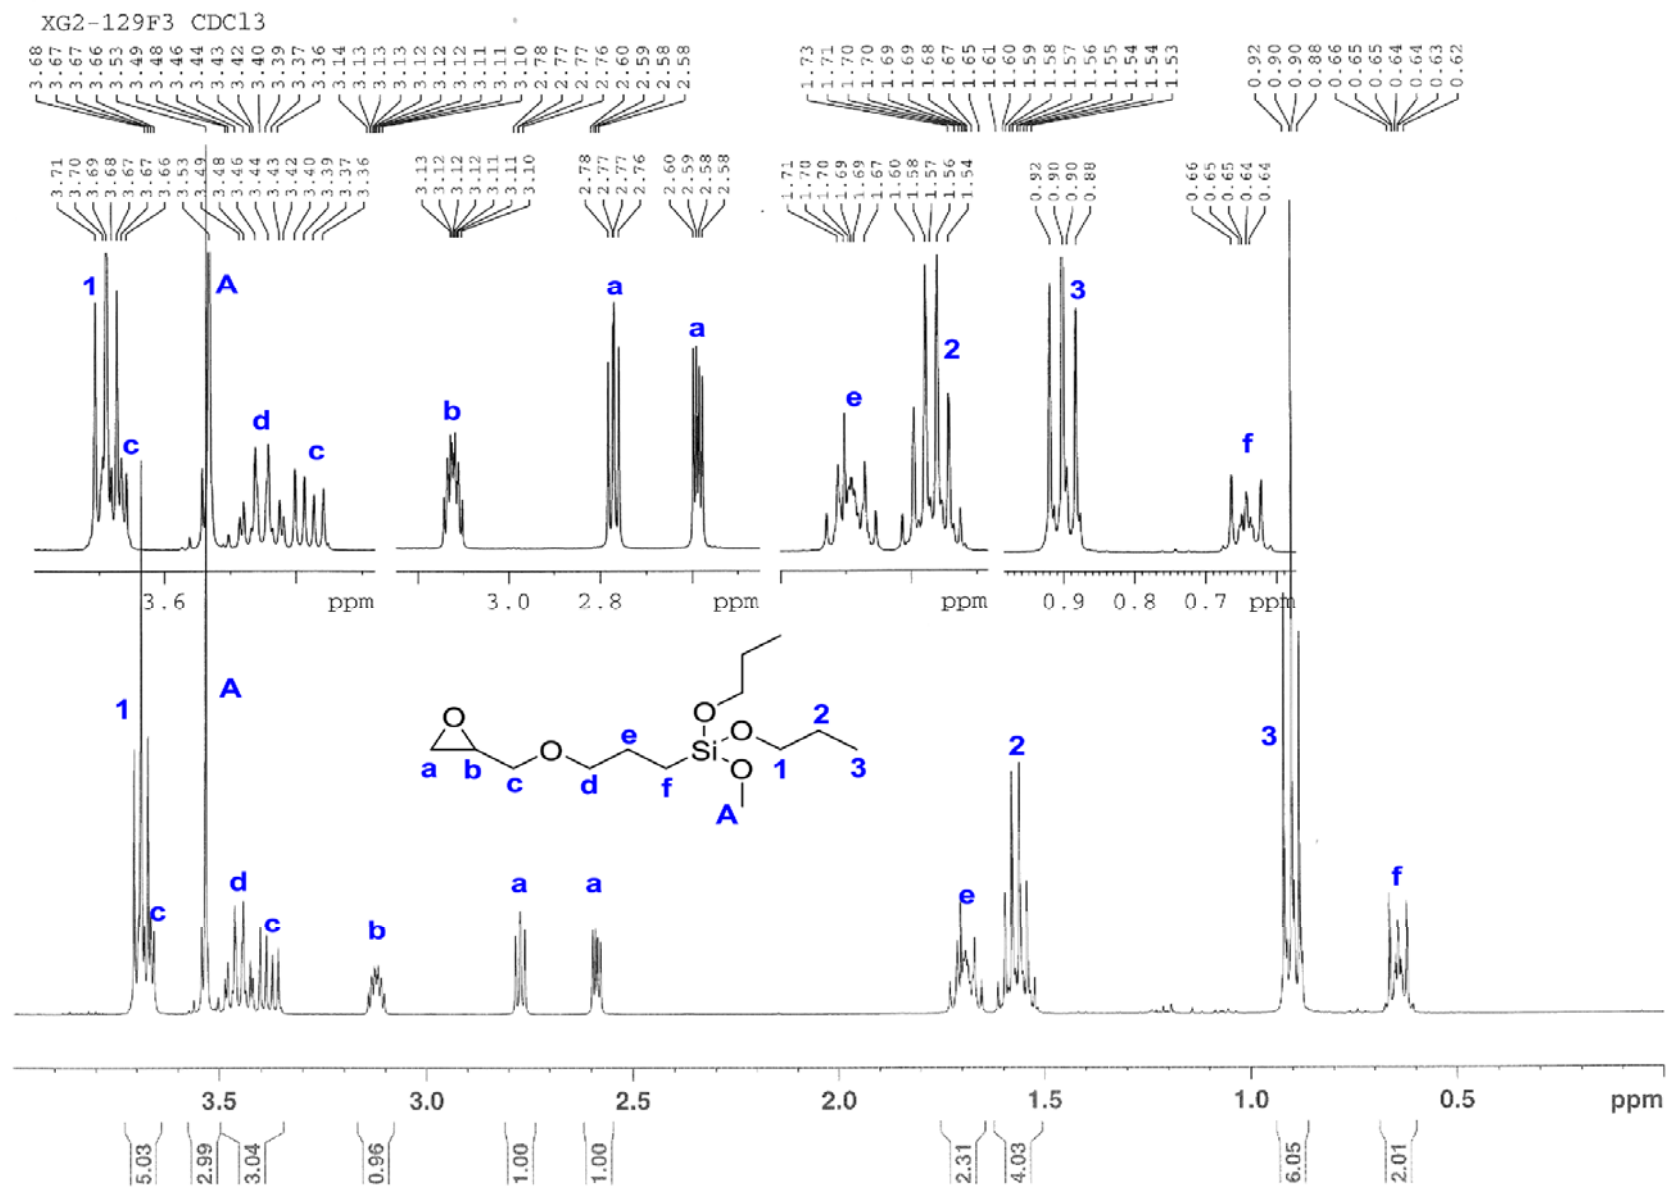

Figure SI\_114:  $^1\text{H}$  NMR spectrum of compound 13c

# SI\_115

XG2-129F3 CDC13 13C

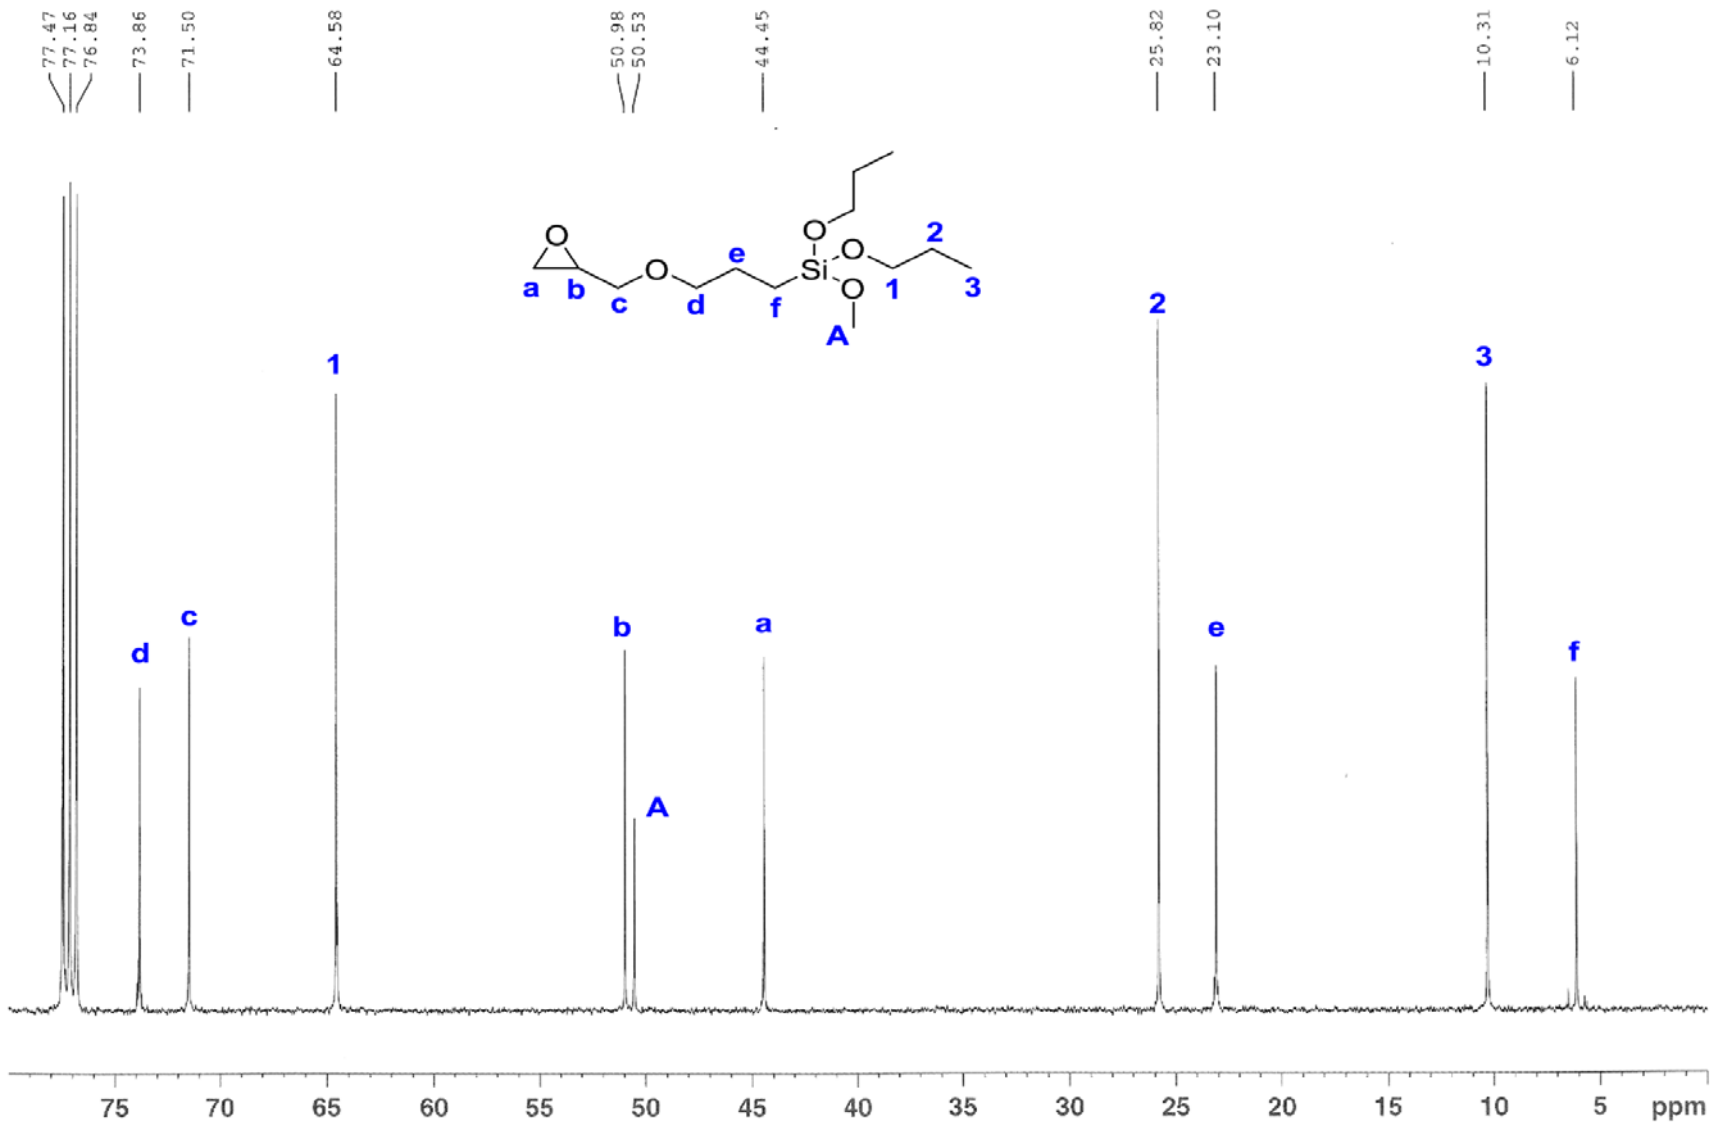

Figure SI\_115:  $^{13}\text{C}$  NMR spectrum of compound 13c

# SI\_116

XG2-129F3 CDC13 DEPT135

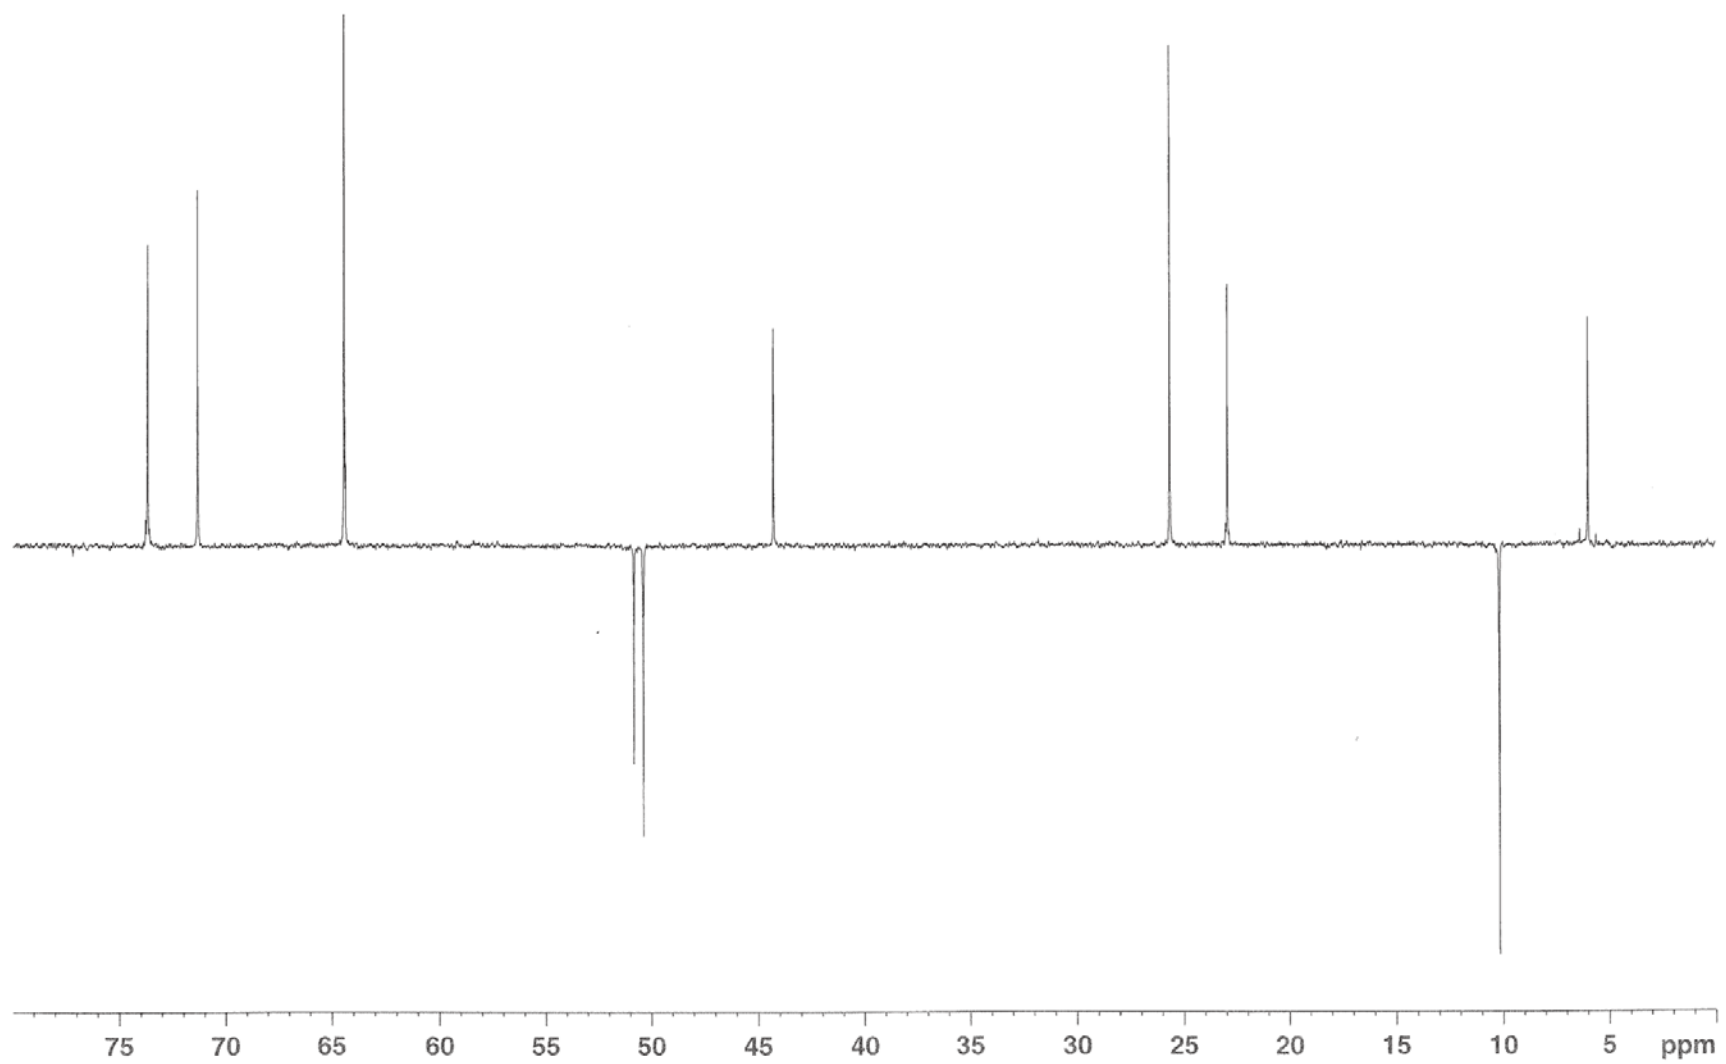

Figure SI\_116: DEPT135 NMR spectrum of compound 13c



# SI\_117

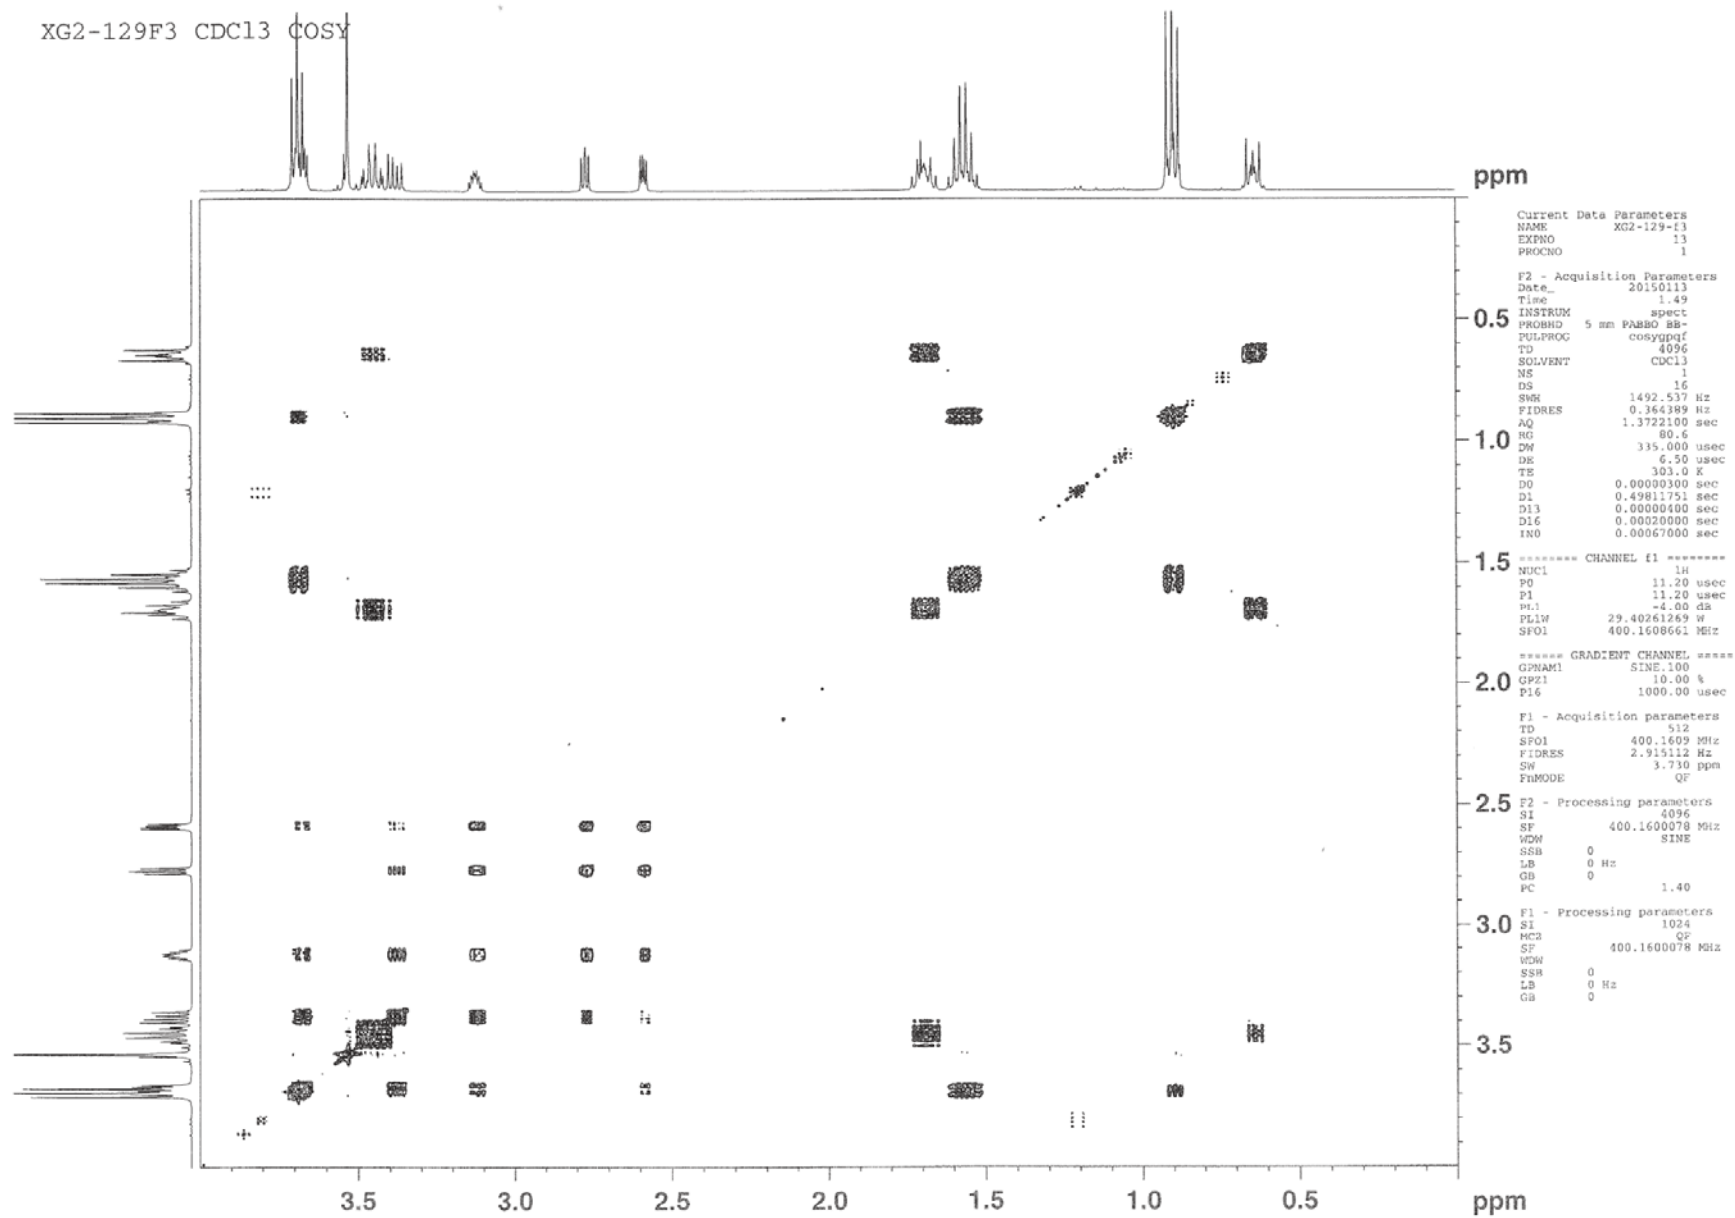

Figure SI\_117:  $^1\text{H}$ - $^1\text{H}$  COSY NMR spectrum of compound 13c

# SI\_118

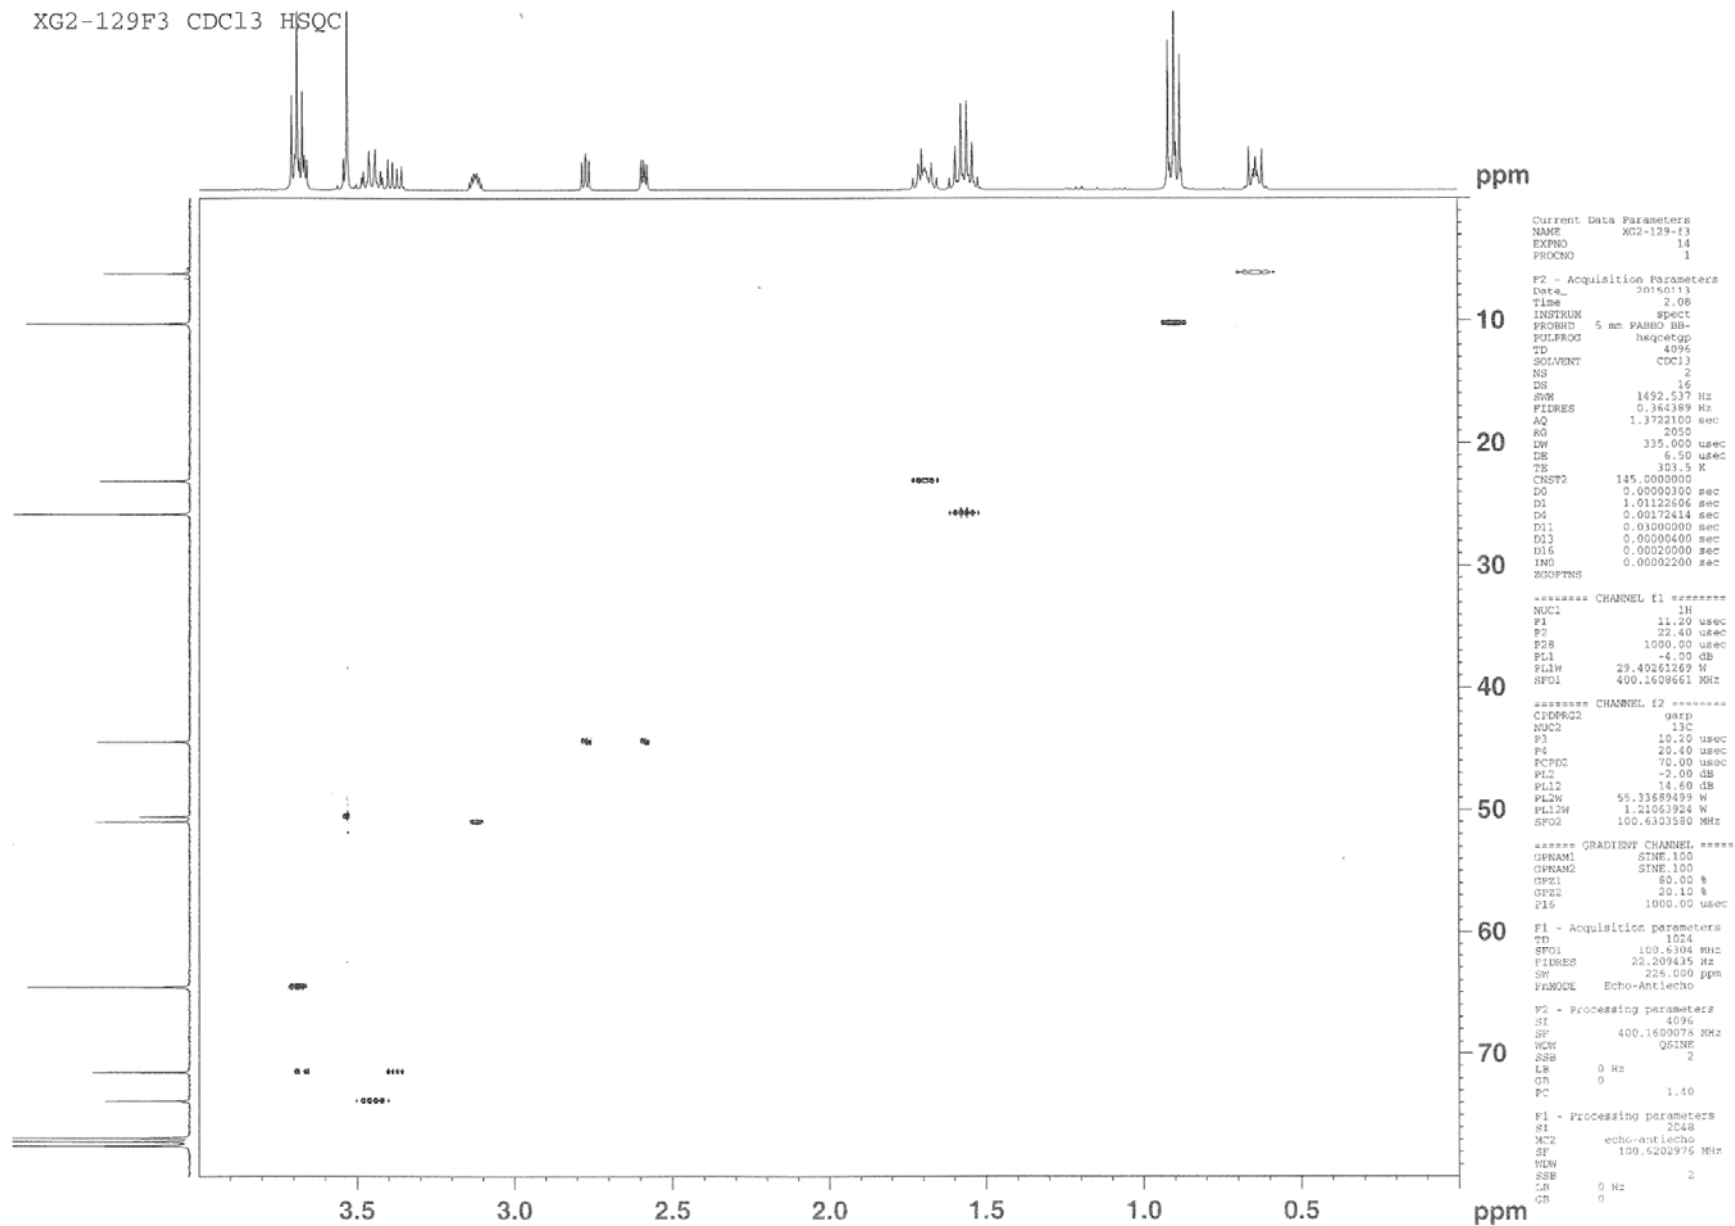

Figure SI\_118: HSQC NMR spectrum of compound 13c

# SI\_119

XG2-129F3 CDC13 HMBC

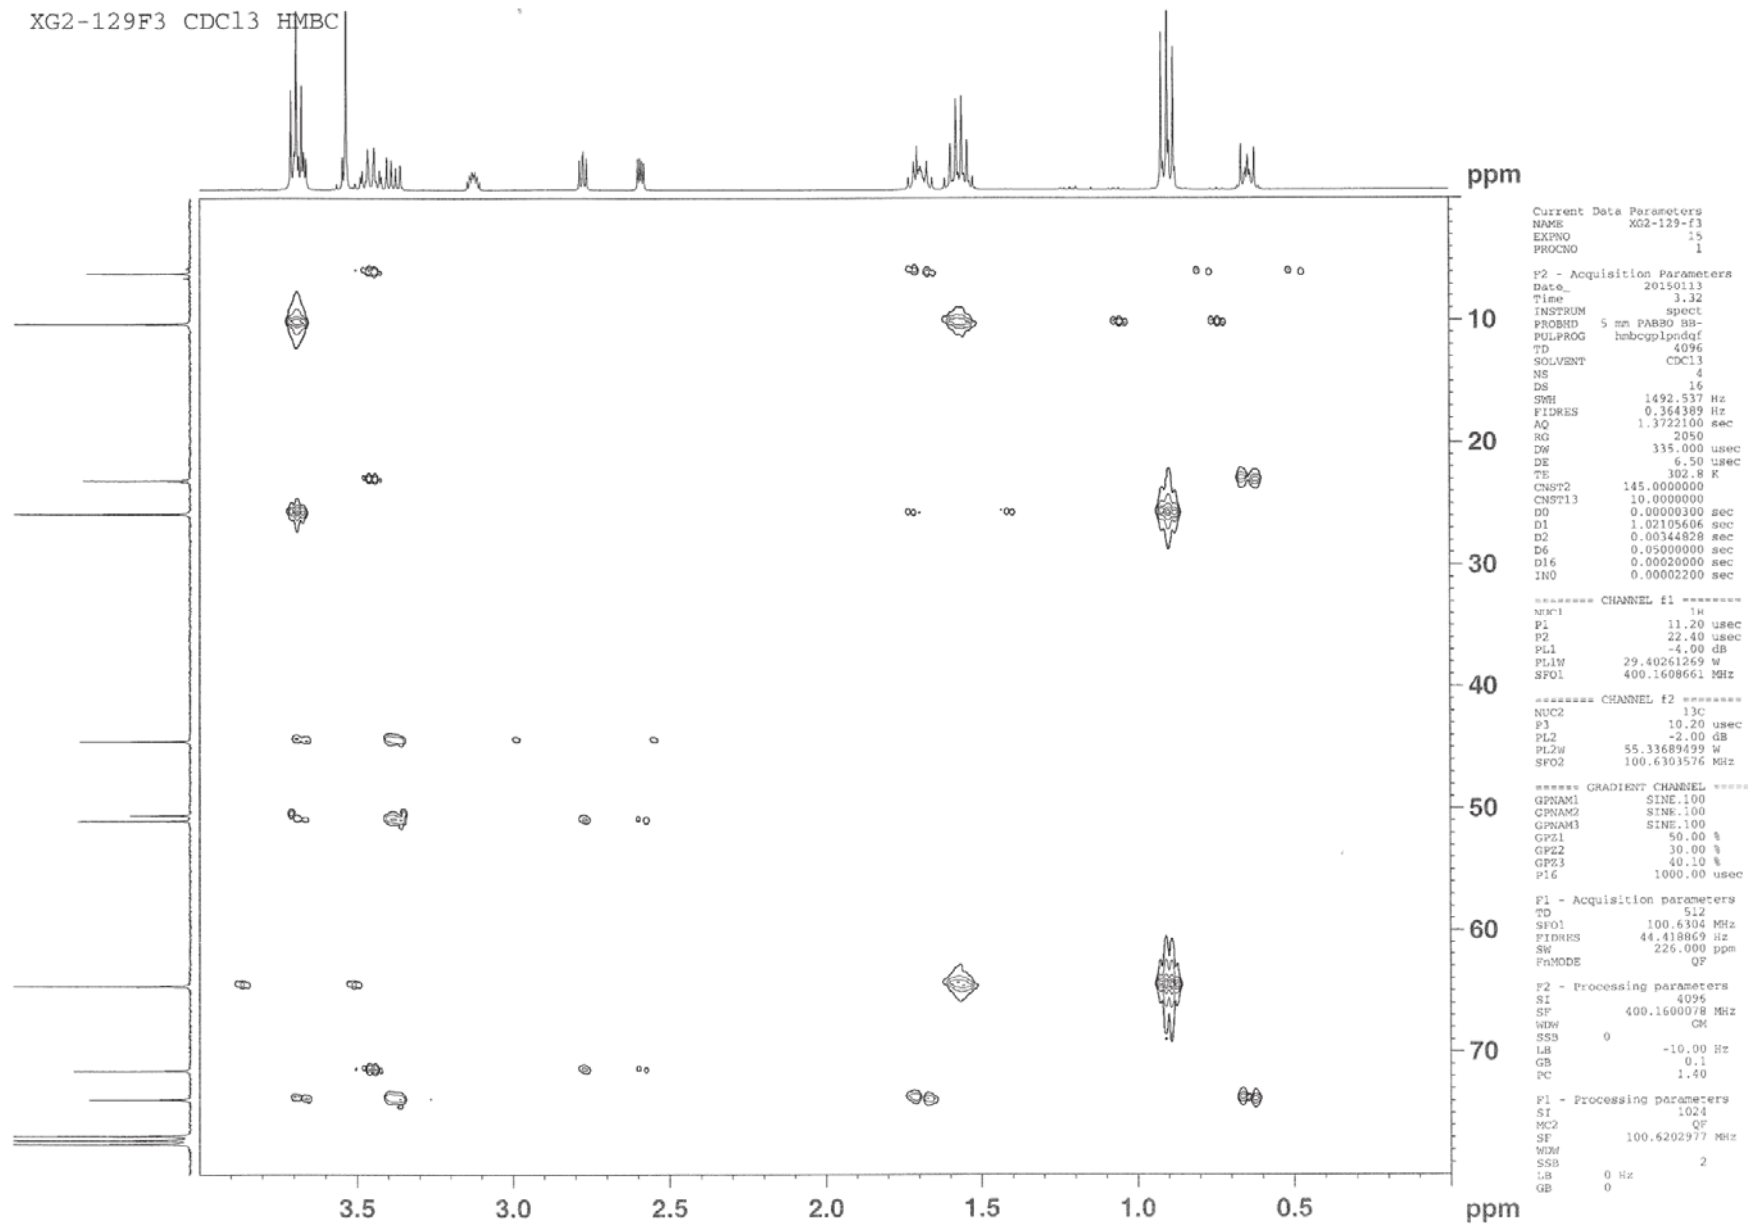

Figure SI\_119: HMBC NMR spectrum of compound 13c

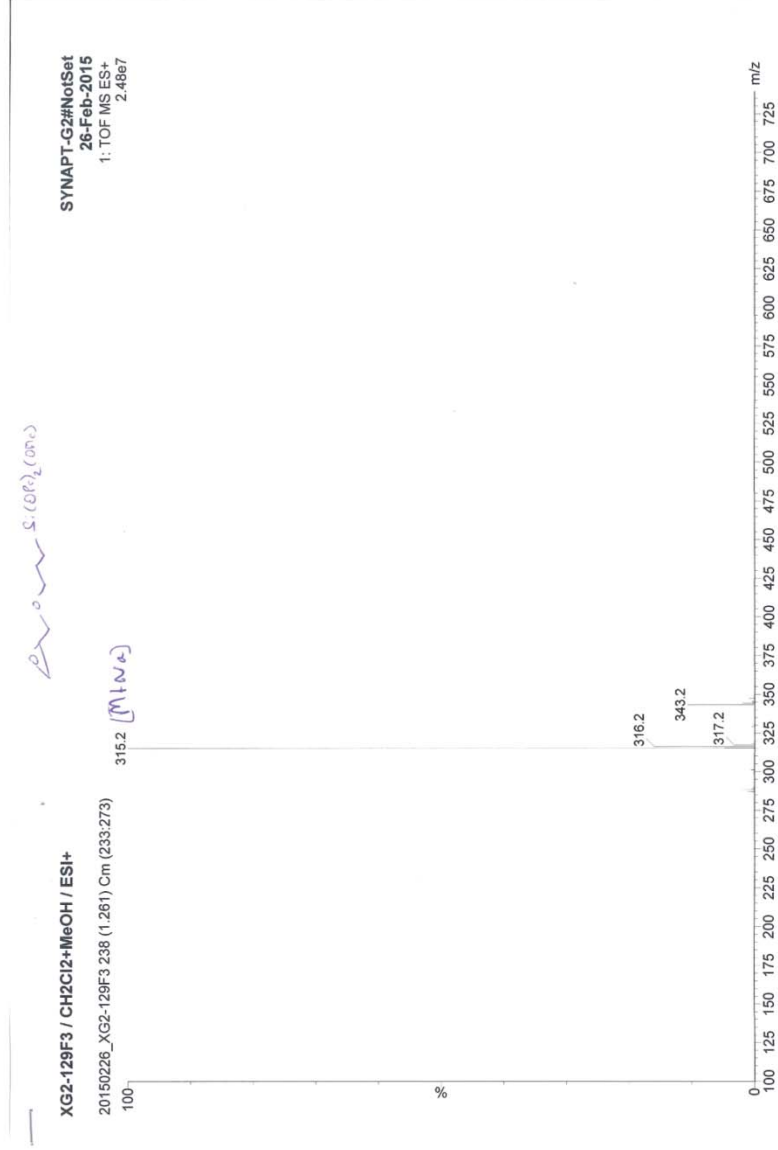

### Elemental Composition Report

#### Single Mass Analysis

Tolerance = 5.0 PPM / DBE: min = -1.5, max = 100.0  
 Element prediction: Off  
 Number of isotope peaks used for I-FIT = 4

Monoisotopic Mass: Even Electron Ions  
 29 results calculated with 1 results within limits (up to 50 closest results for each mass)  
 Elements Used:  
 C: 0-70 H: 0-120 O: 0-11 Na: 1-1 Si: 1-1

SYNAPT-G2#NoiSet  
 26-Feb-2015  
 1: TOF MS ES+

20150226\_XG2-129F3 238 (1.261) AMZ (A: 20000.0, O: 0.001, Cm (233.273)  
 XG2-129F3 / CH2Cl2+MeOH / ESI+  
 4.30e+007

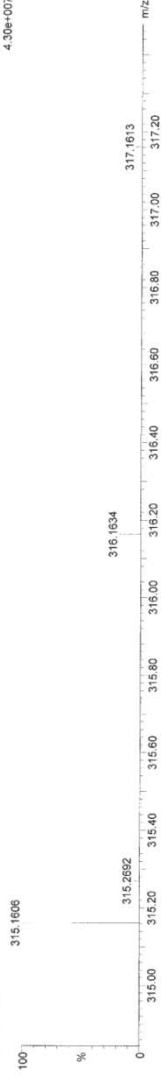

| Mass     | Calc. Mass | mDa | PFM | DBE | I-FIT | Formula          |
|----------|------------|-----|-----|-----|-------|------------------|
| 315.1606 | 315.1604   | 0.2 | 0.6 | 0.5 | n/a   | C13 H28 O5 Na S1 |

Figure SI\_1202: ESI-HRMS NMR spectrum of compound 13c

SI\_121

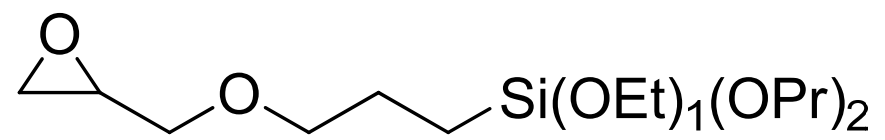

**14a**

# SI\_122

GG1-11F2 1H CDC13

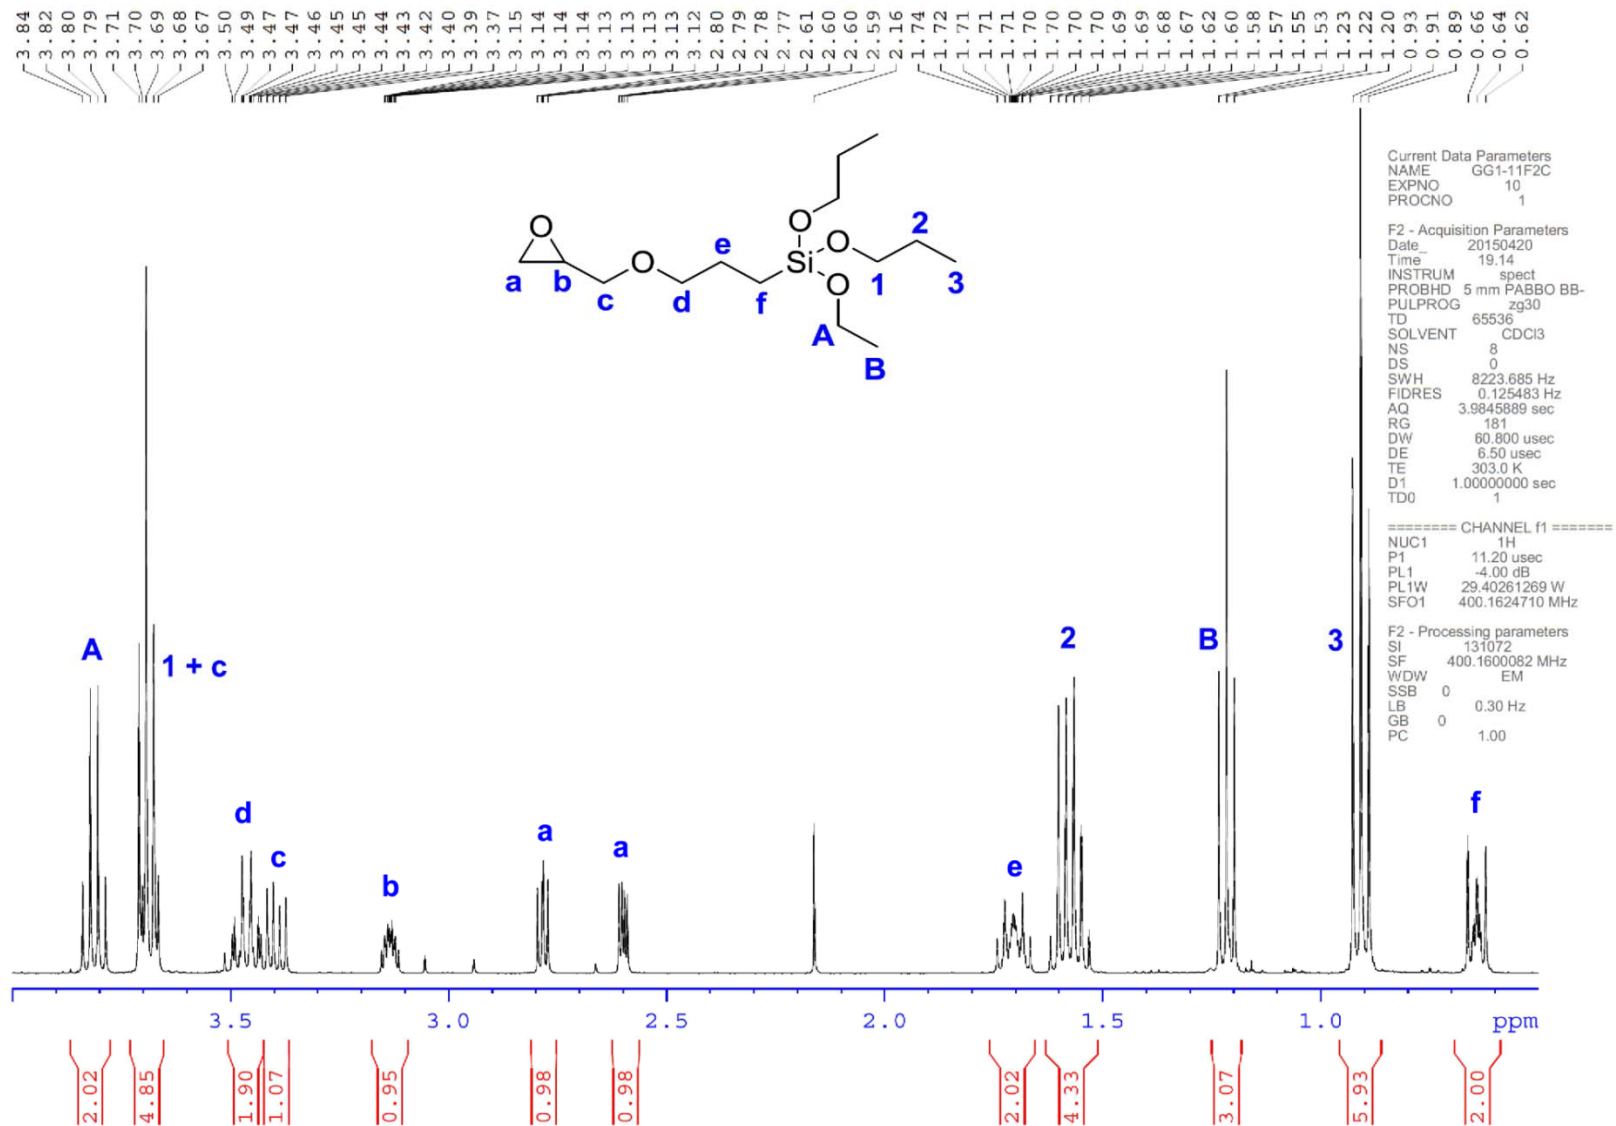

Figure SI\_122: <sup>1</sup>H NMR spectrum of compound 14a

# SI\_123

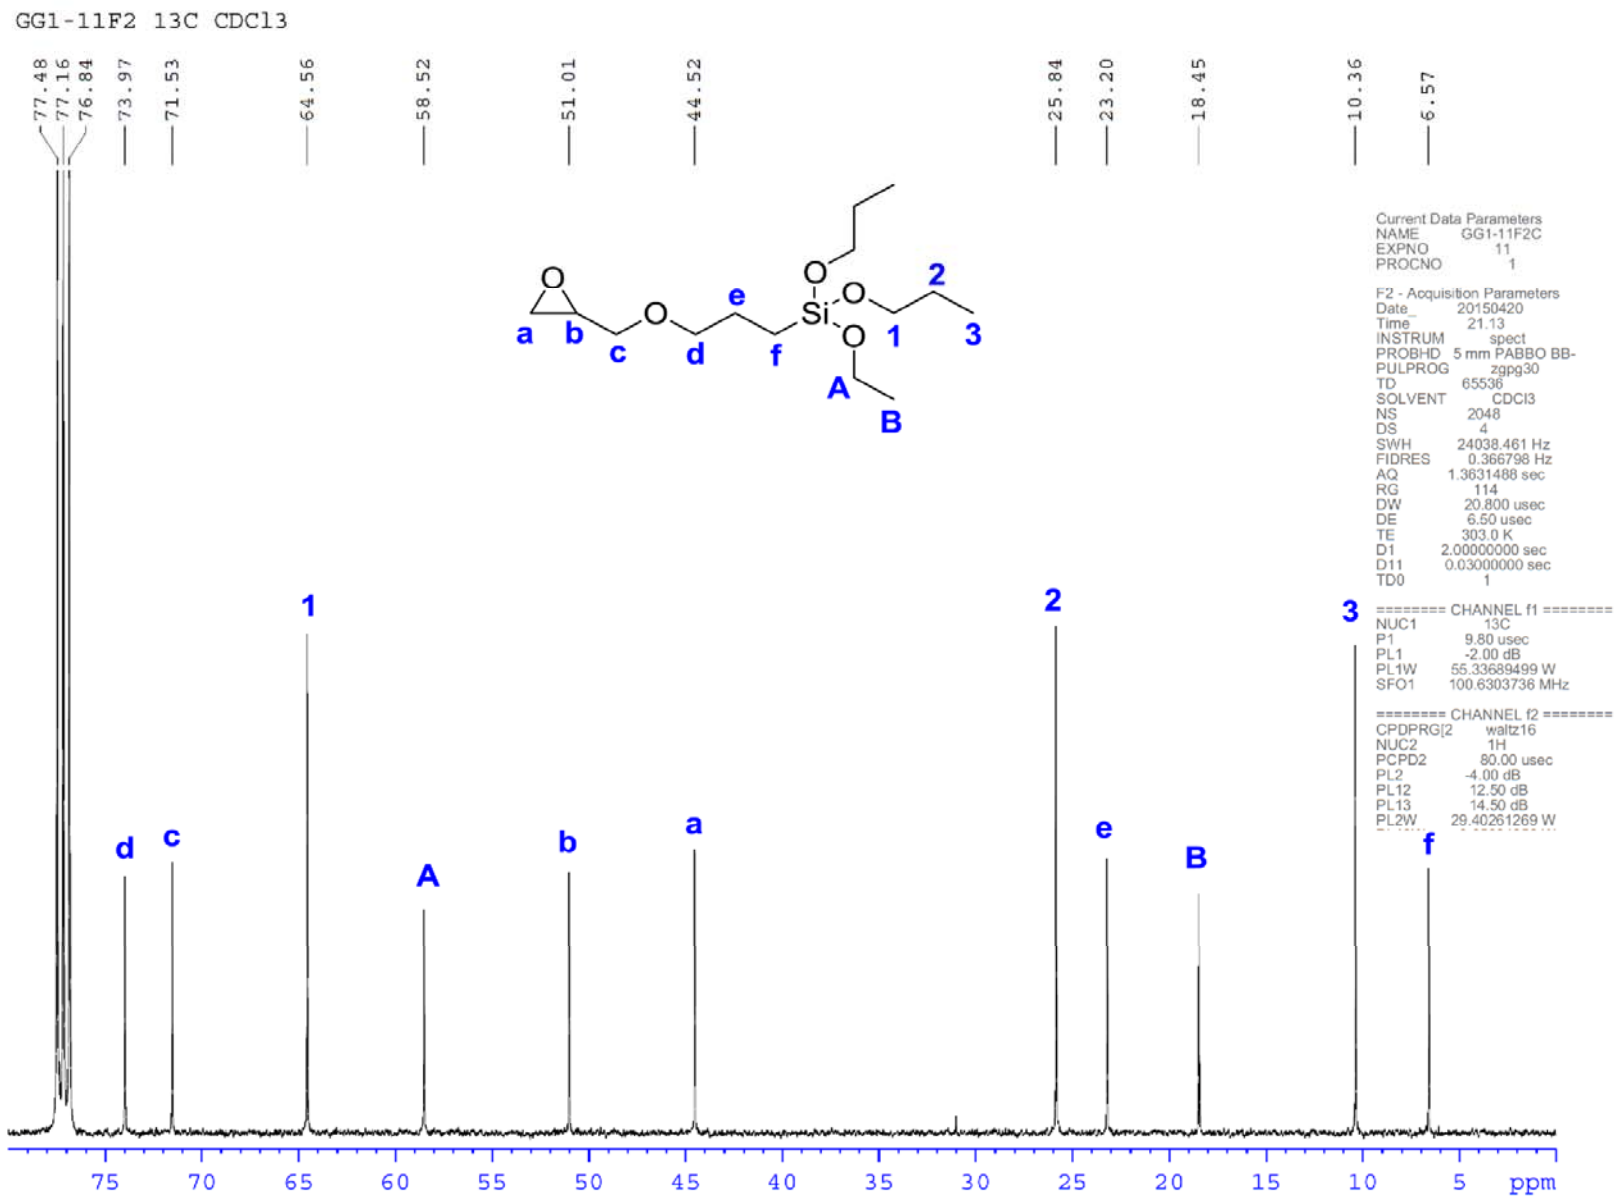

Figure SI\_123: <sup>13</sup>C NMR spectrum of compound 14a

# SI\_124

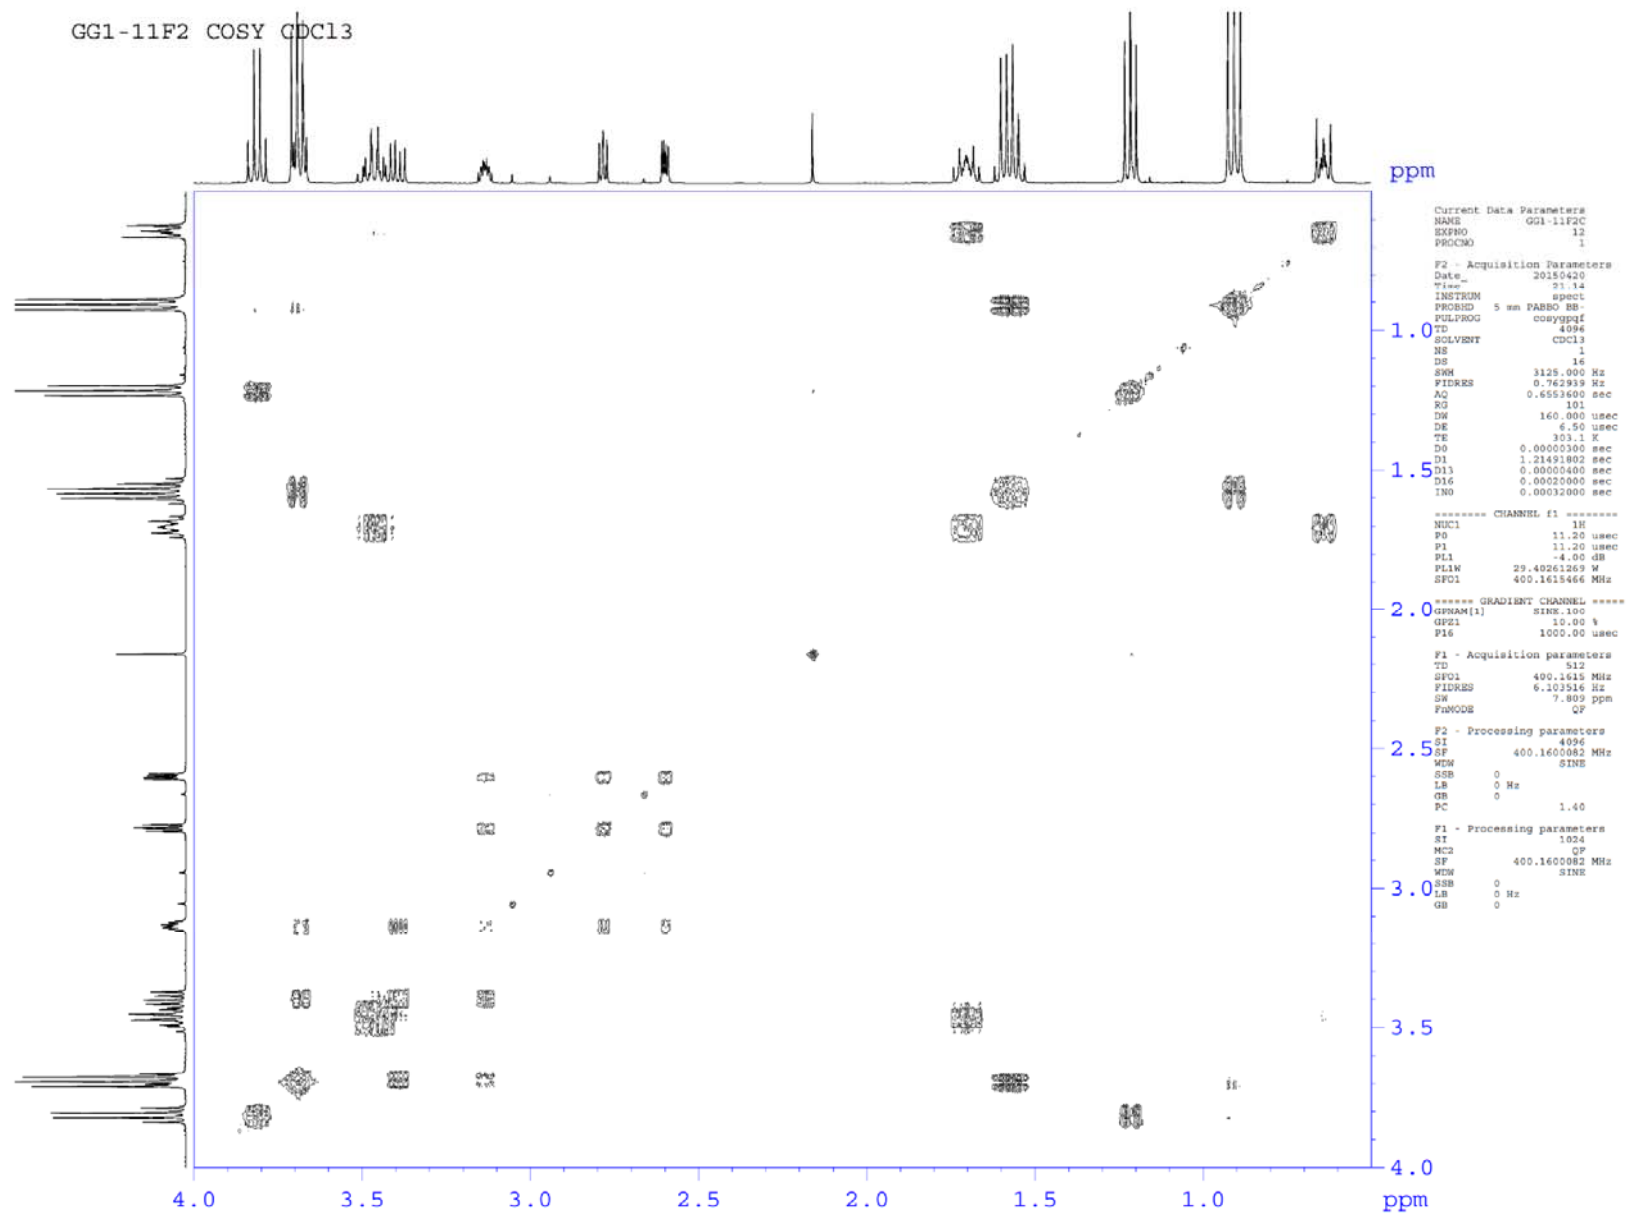

Figure SI\_124:  $^1\text{H}$ - $^1\text{H}$  COSY NMR spectrum of compound 14a



# SI\_125

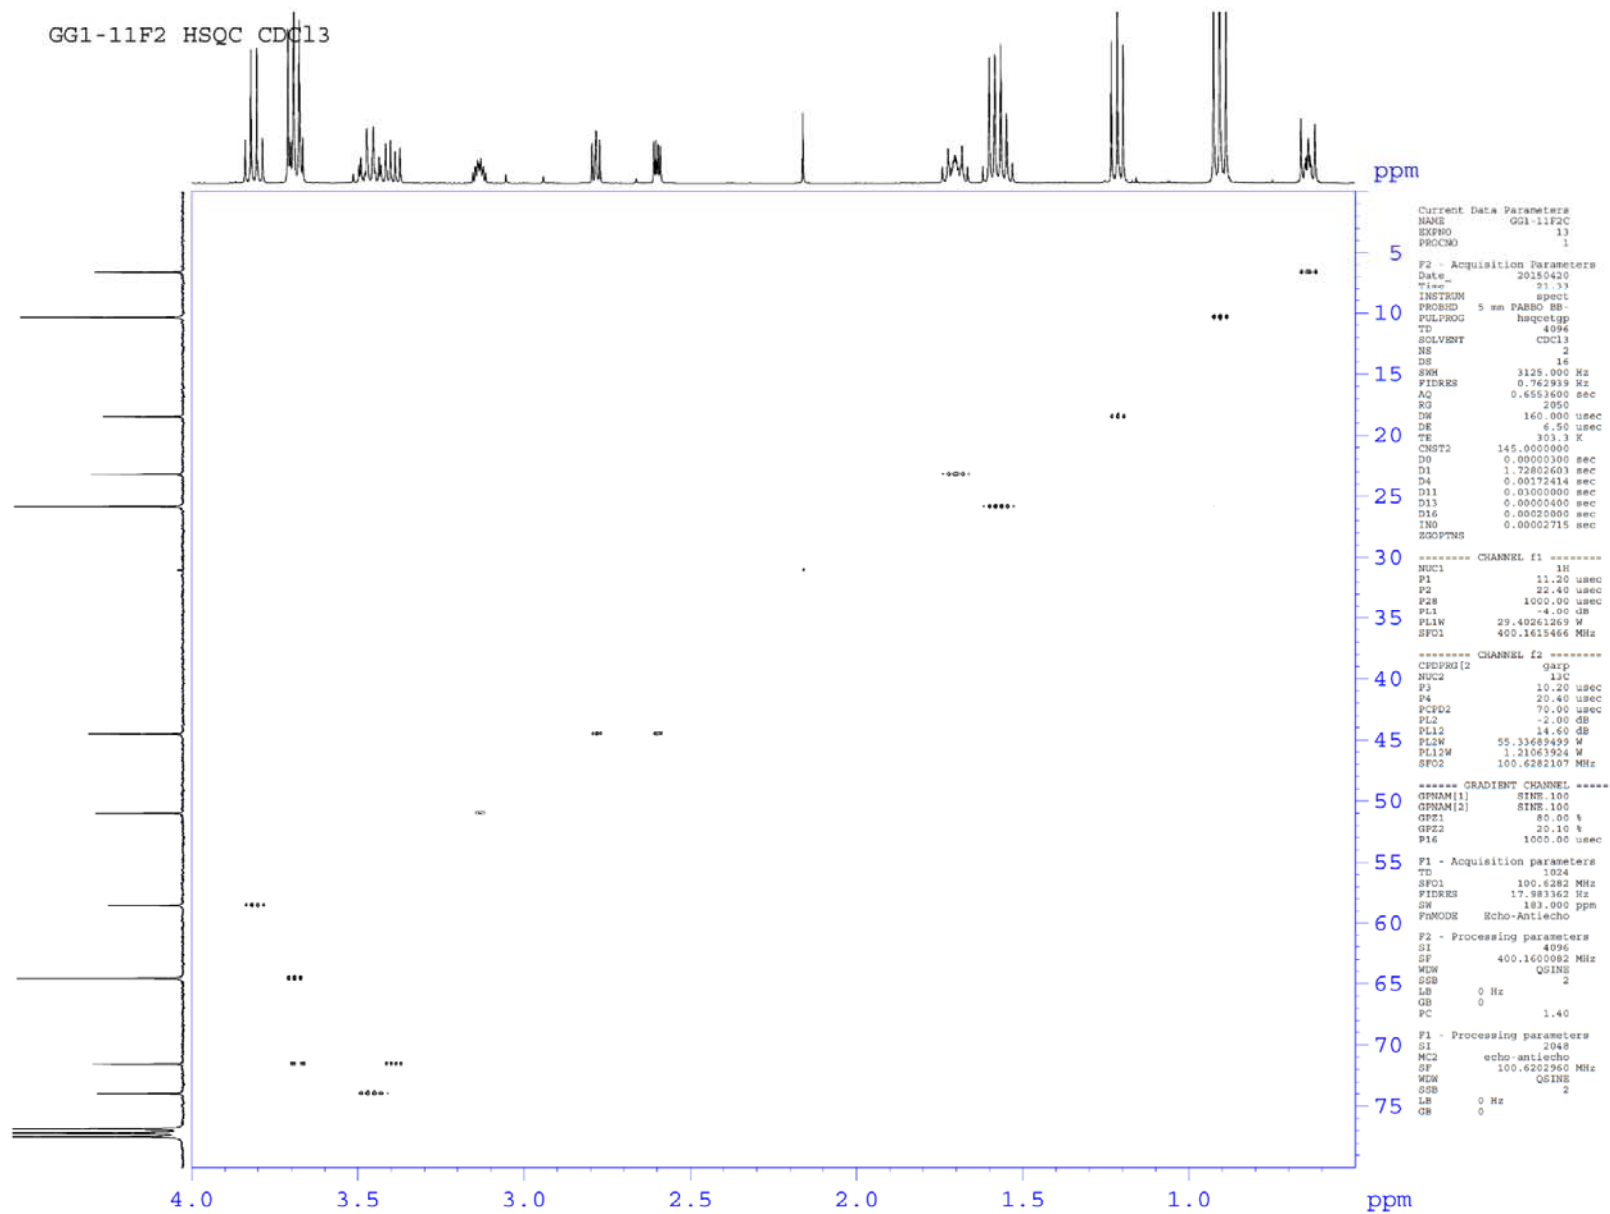

Figure SI\_125: HSQC NMR spectrum of compound 14a

# SI\_126

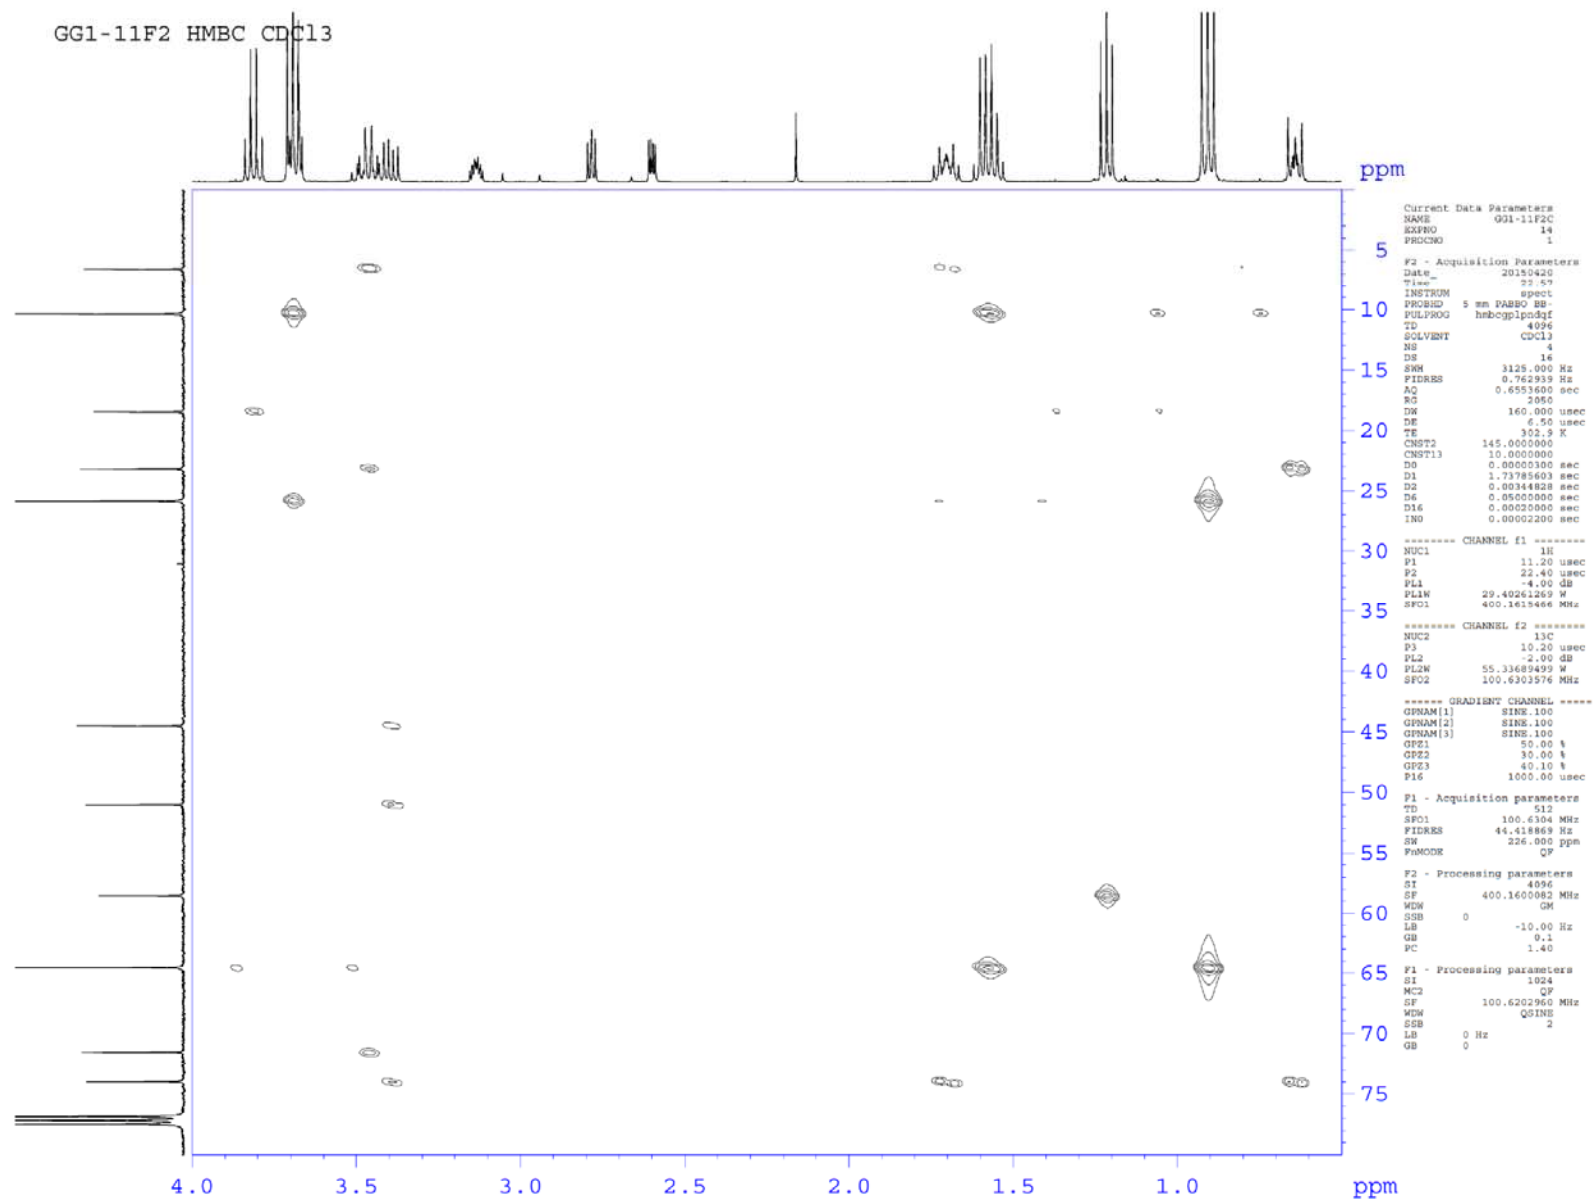

Figure SI\_126: HMBC NMR spectrum of compound 14a

LCT  
13-Apr-2015  
1: TOF MS ES+1.4063

GG1-11F2 / CH2Cl2+MeOH / ESI+  
20150413\_GG1-11F2 60 (1.202) Cm (58.81)

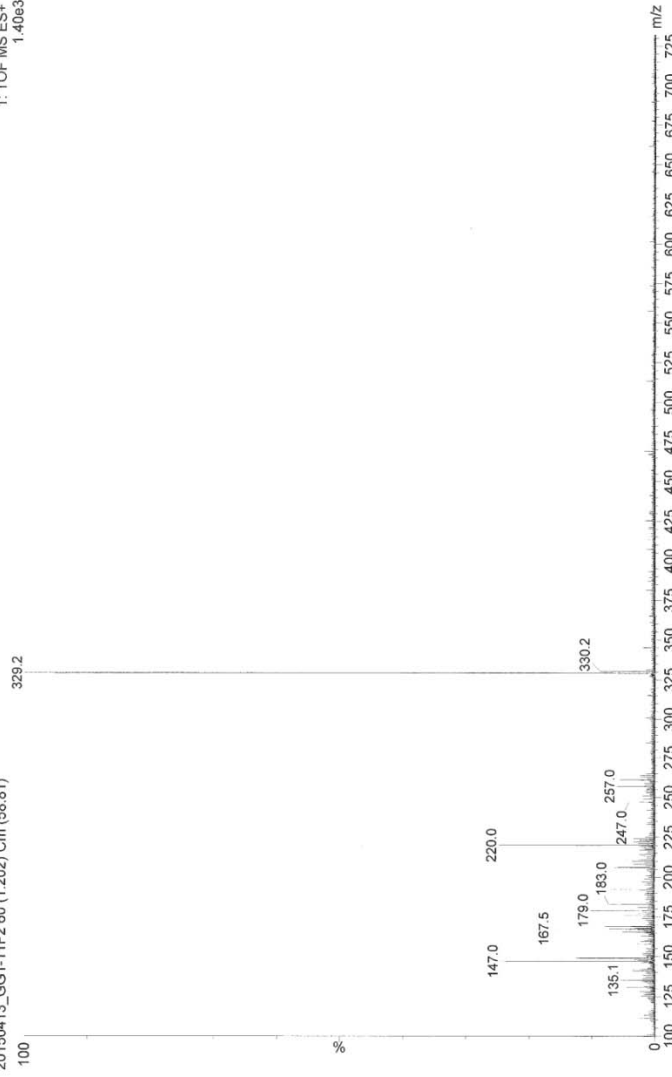

#### Elemental Composition Report

##### Single Mass Analysis

Tolerance = 5.0 PPM / DBE: min = -1.5, max = 100.0  
Element prediction: Off  
Number of isotope peaks used for i-FIT = 4

Monoisotopic Mass, Even Electron Ions

88 formulae evaluated with 2 results within limits (up to 50 closest results for each mass)

Elements Used: C: 0-100 H: 0-120 O: 0-5 Na: 0-1 S: 0-1

LC11-11F2 / CH2Cl2+MeOH / ESI+

20150413\_GG1-11F2 27 (0.552) AM (Cm,13, 80.00, A,4100.0,556.28,0.00,LS 10); Cm (27.37)

13-Apr-2015

1.10e+004

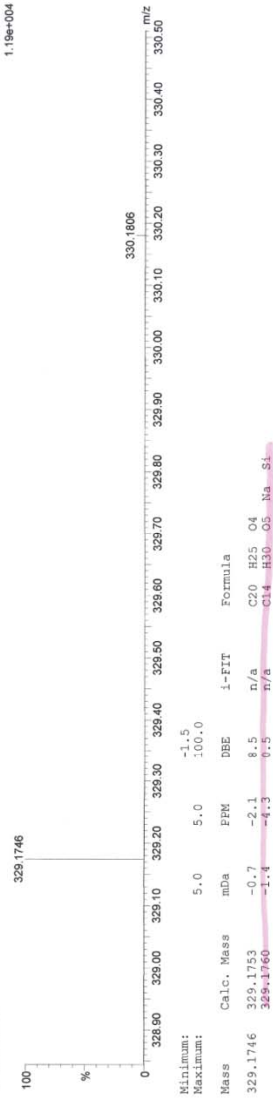

Figure SI\_127: ESI HRMS NMR spectrum of compound 14a

SI\_128

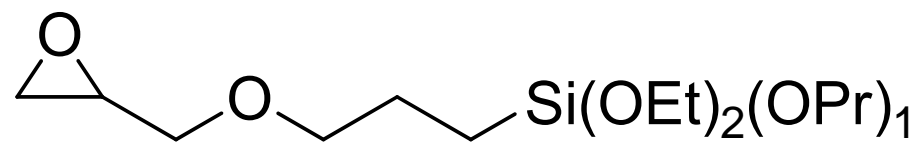

**14b**

# SI\_129

GG1-11F3 1H CDC13

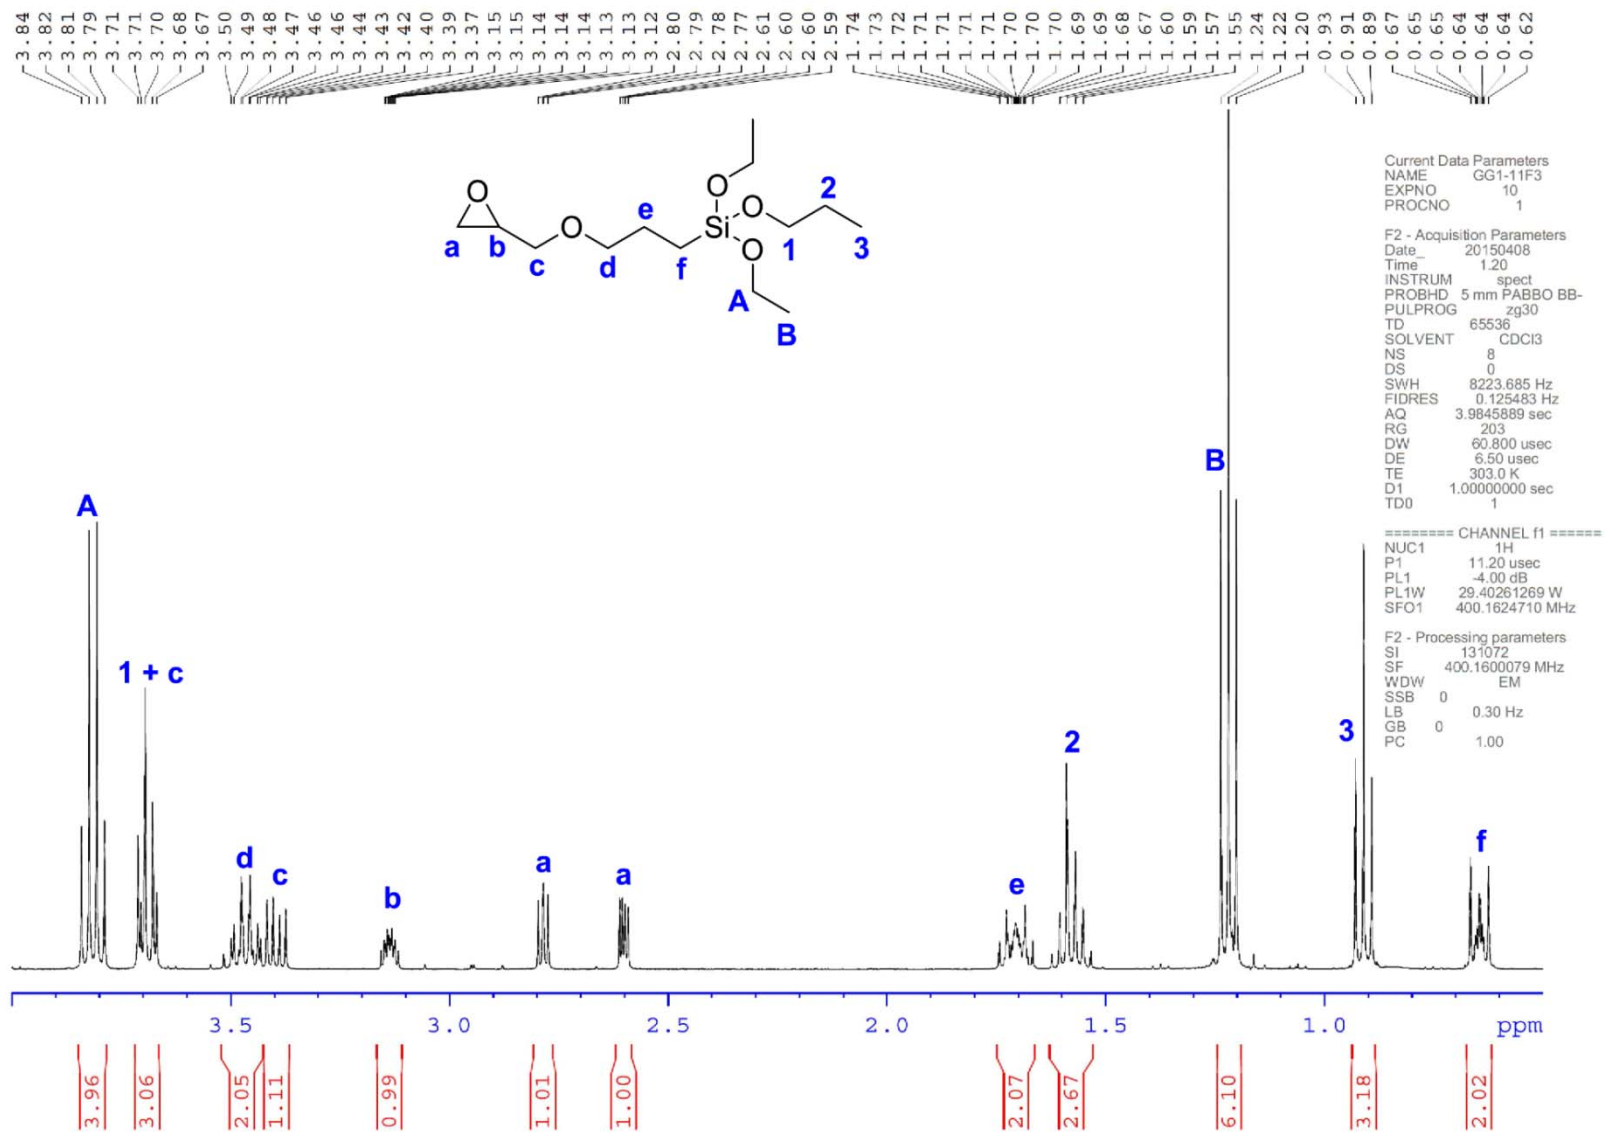

Figure SI\_129:  $^1\text{H}$ - $^1\text{H}$  NMR spectrum of compound 14b

# SI\_130

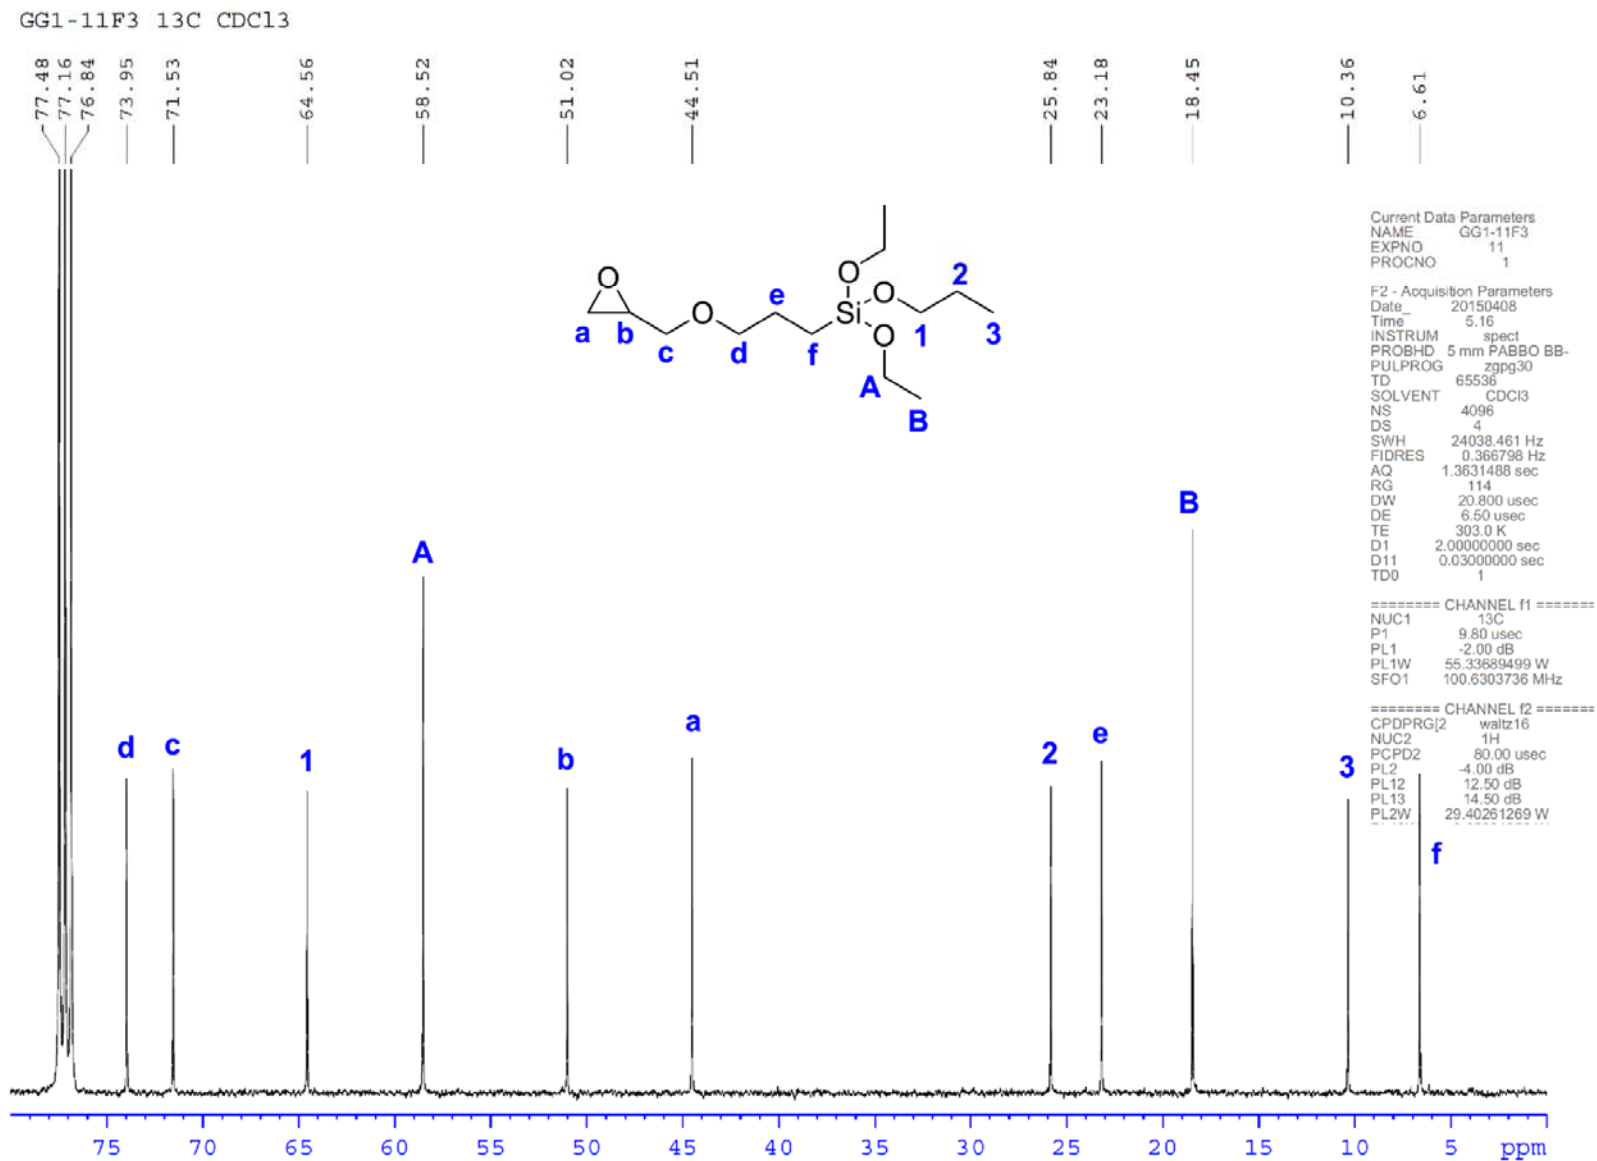

Figure SI\_130: <sup>13</sup>C NMR spectrum of compound 14b

# SI\_131

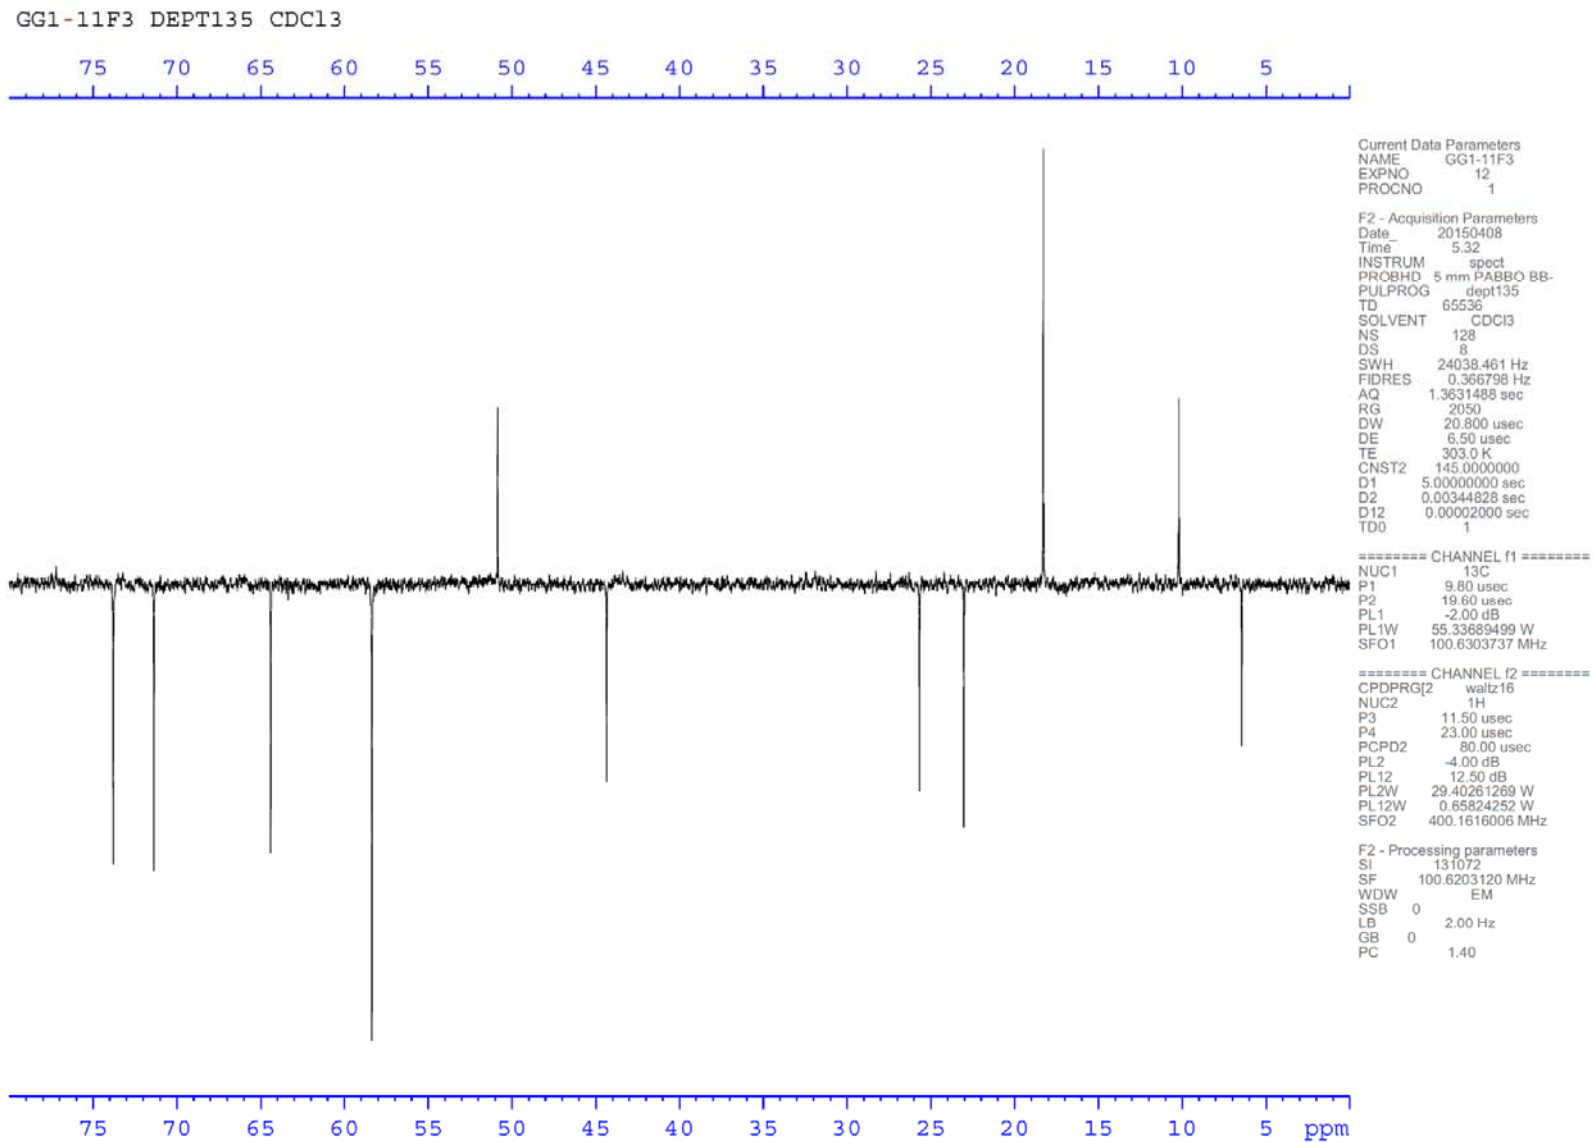

Figure SI\_131: DEPT 135 NMR spectrum of compound 14b

# SI\_132

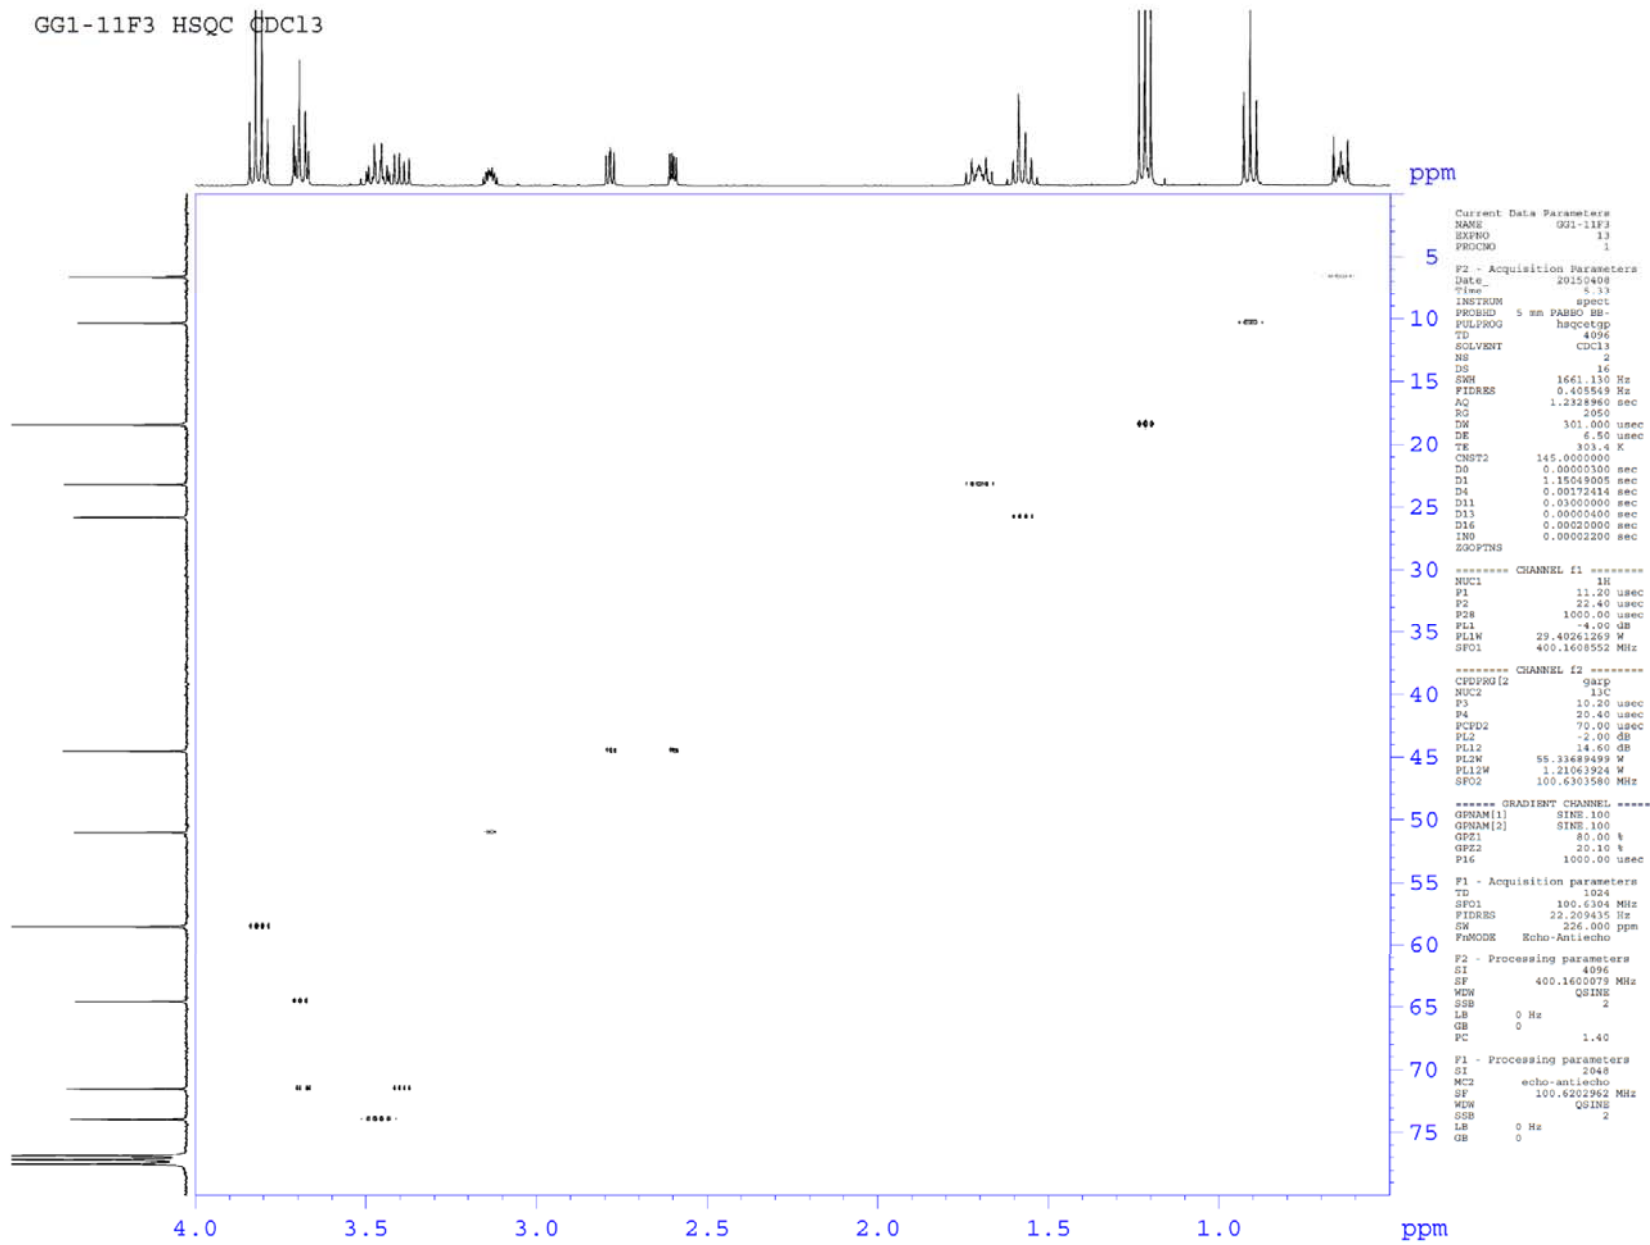

Figure SI\_132: HSQC NMR spectrum of compound 14b



# SI\_133

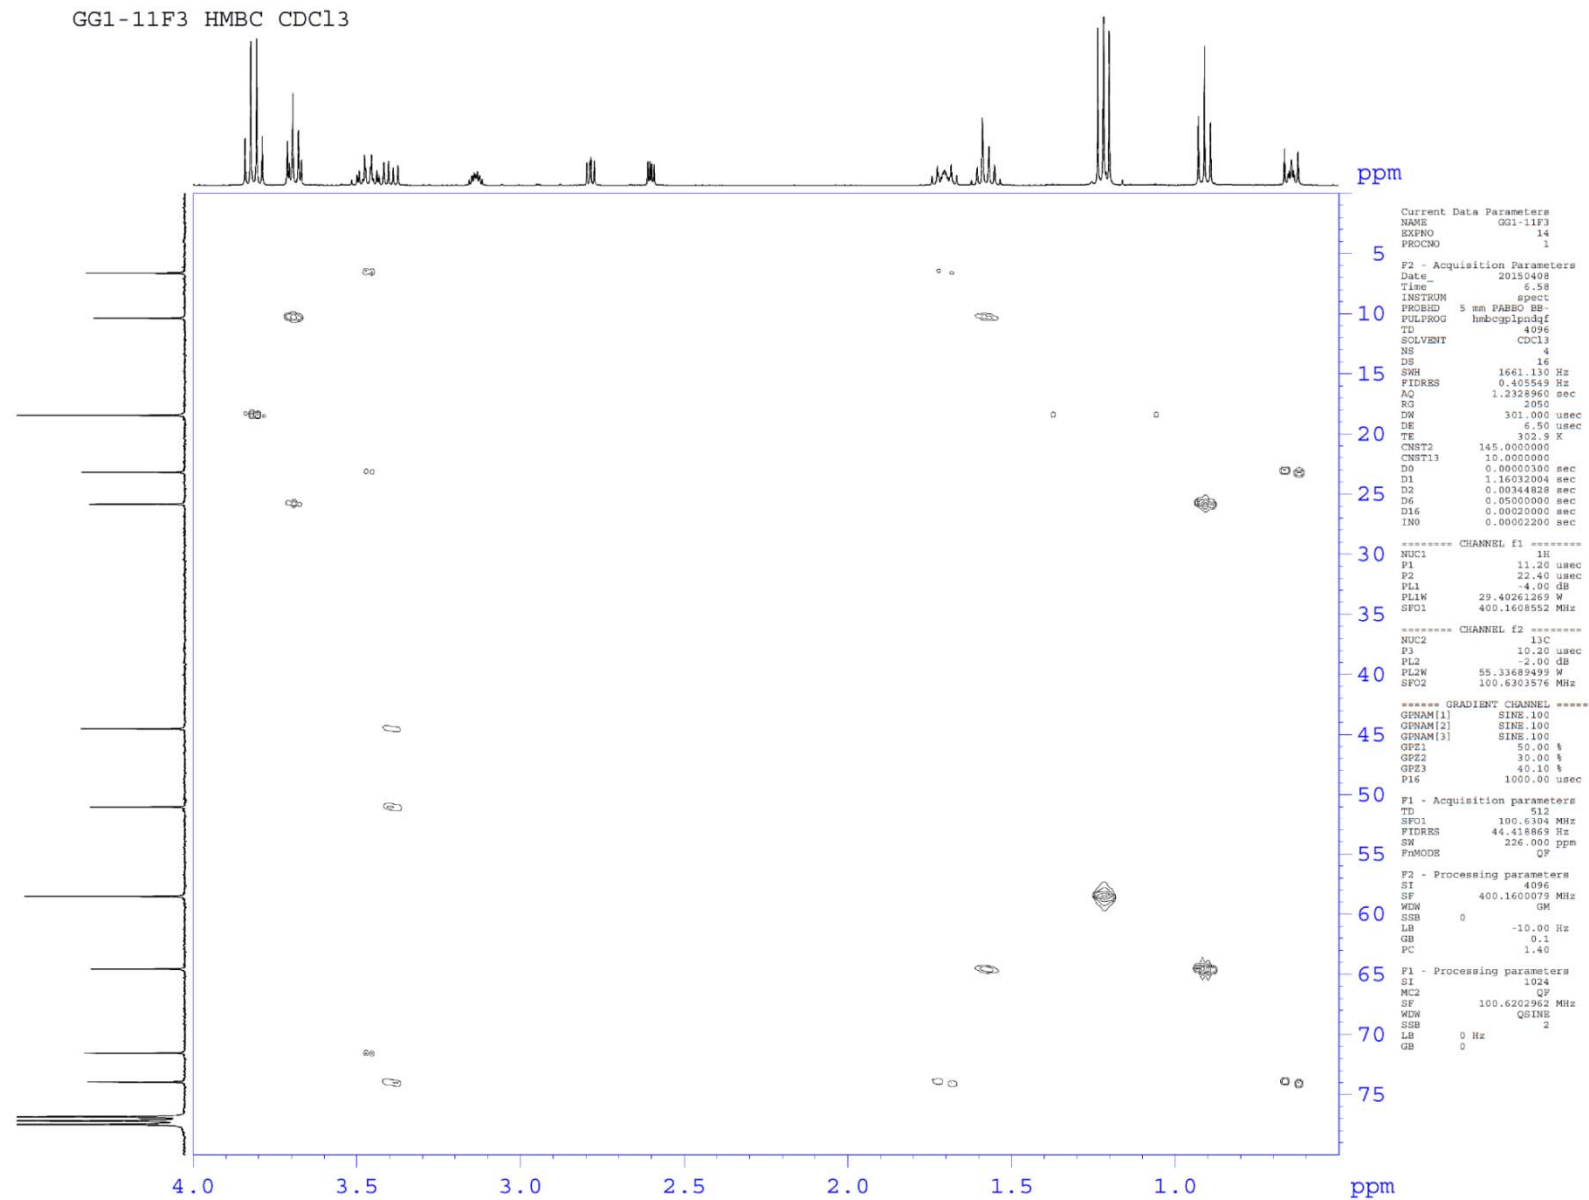

Figure SI\_133: HMBC NMR spectrum of compound 14b

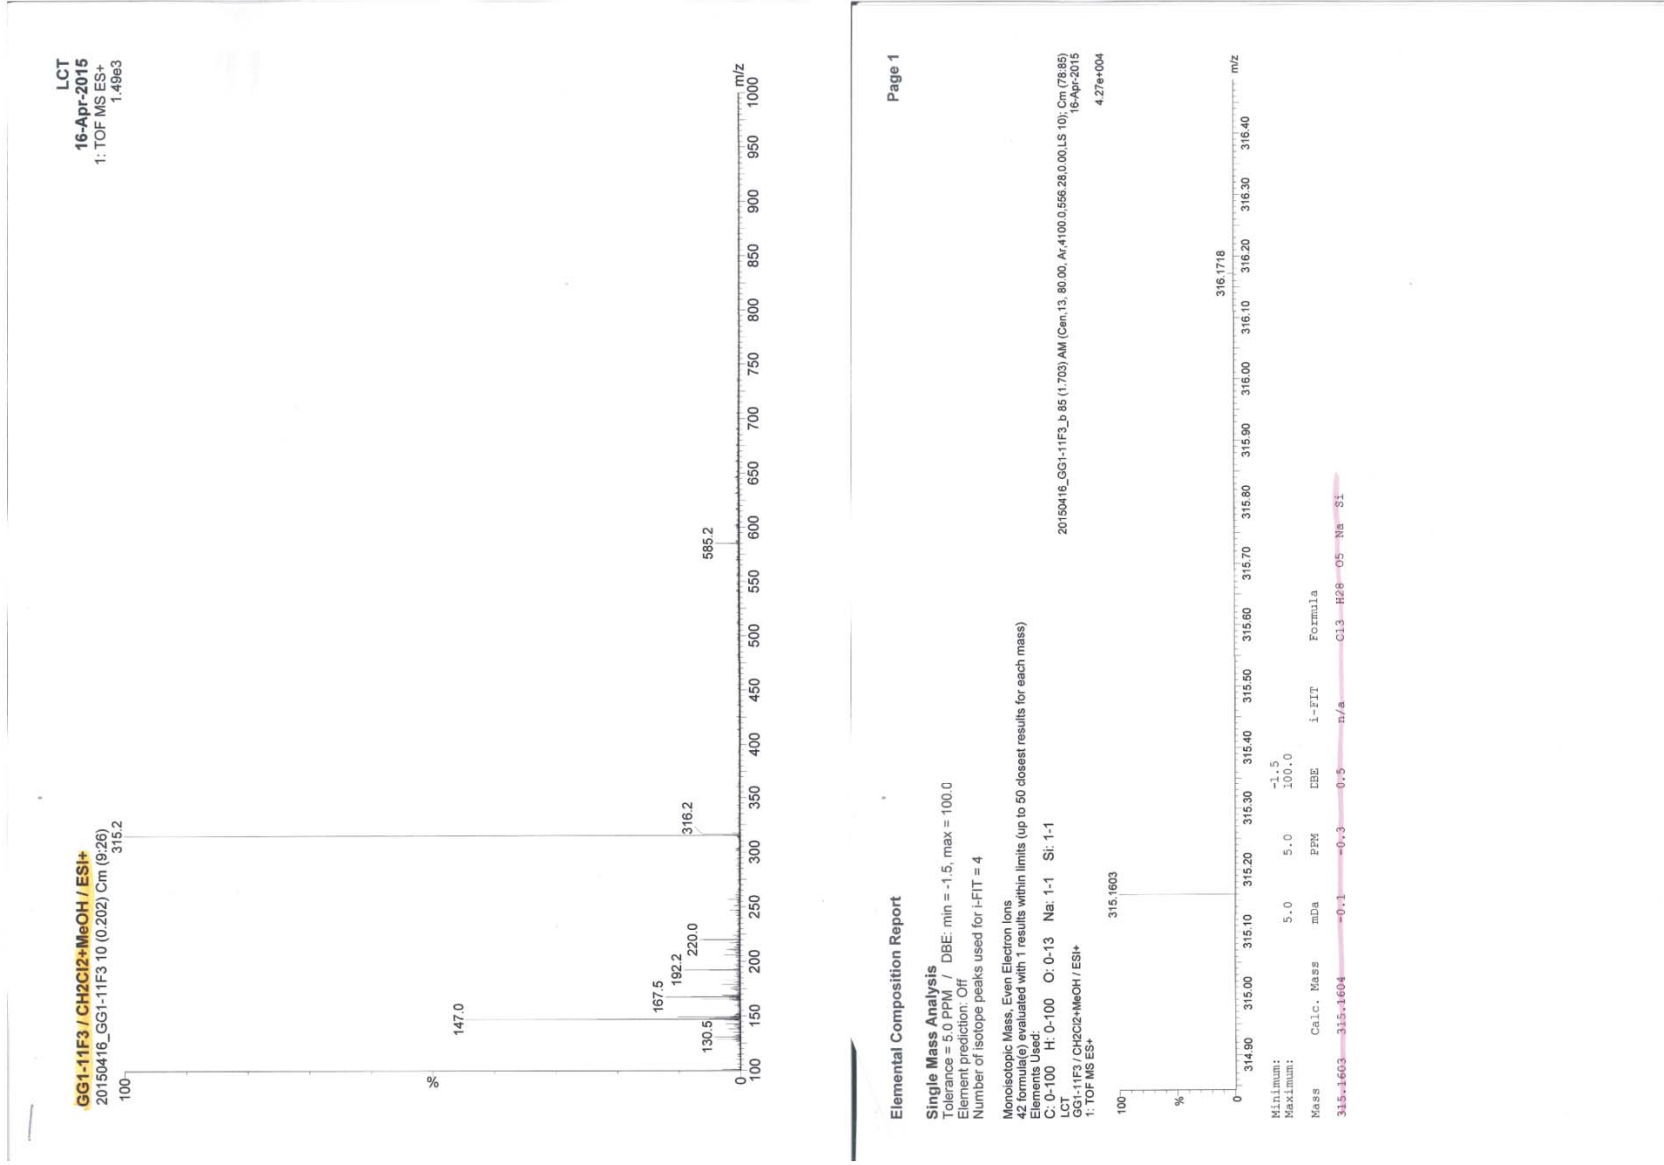

Figure SI\_134: ESI HRMS NMR spectrum of compound 14b

SI\_135

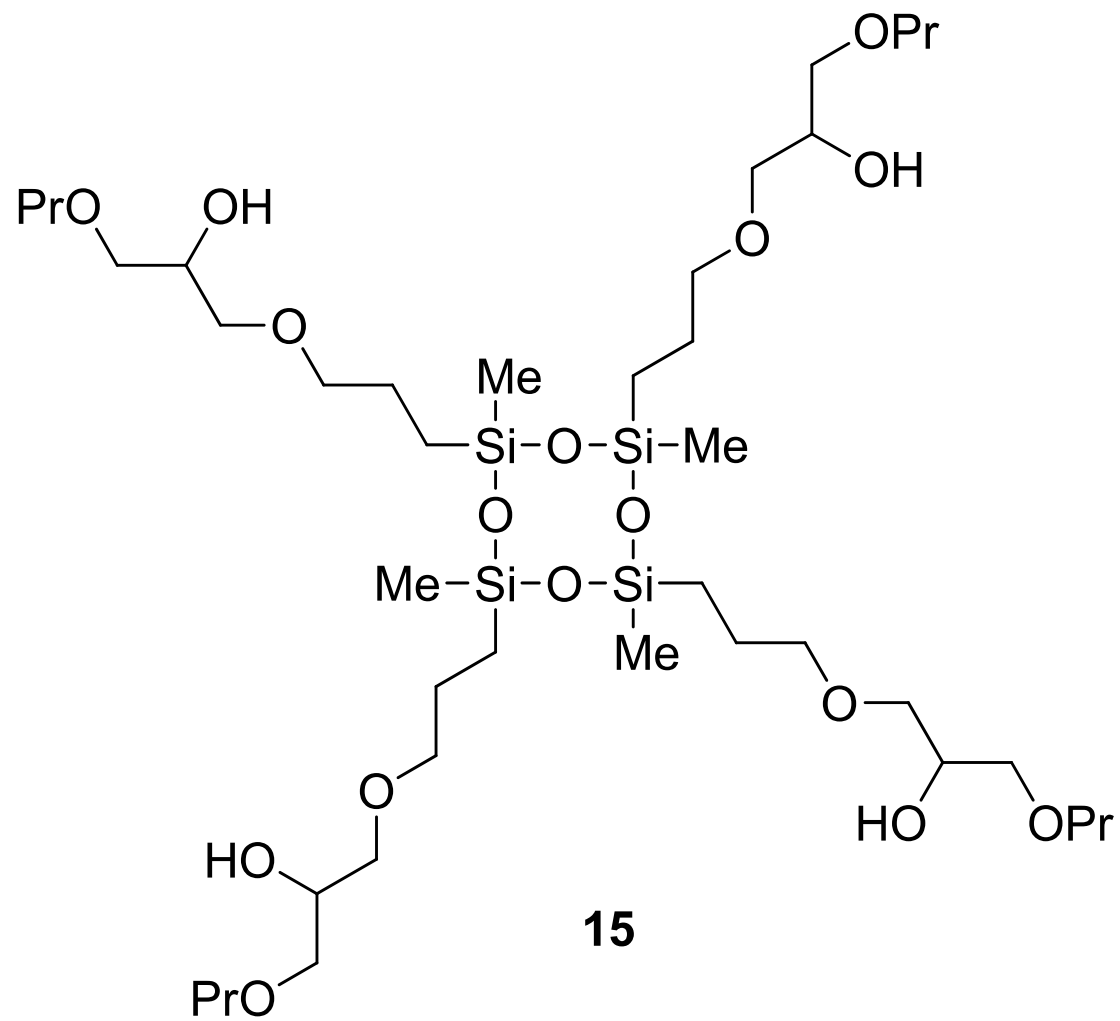

# SI\_136

GG1-12F1 1H CDC13

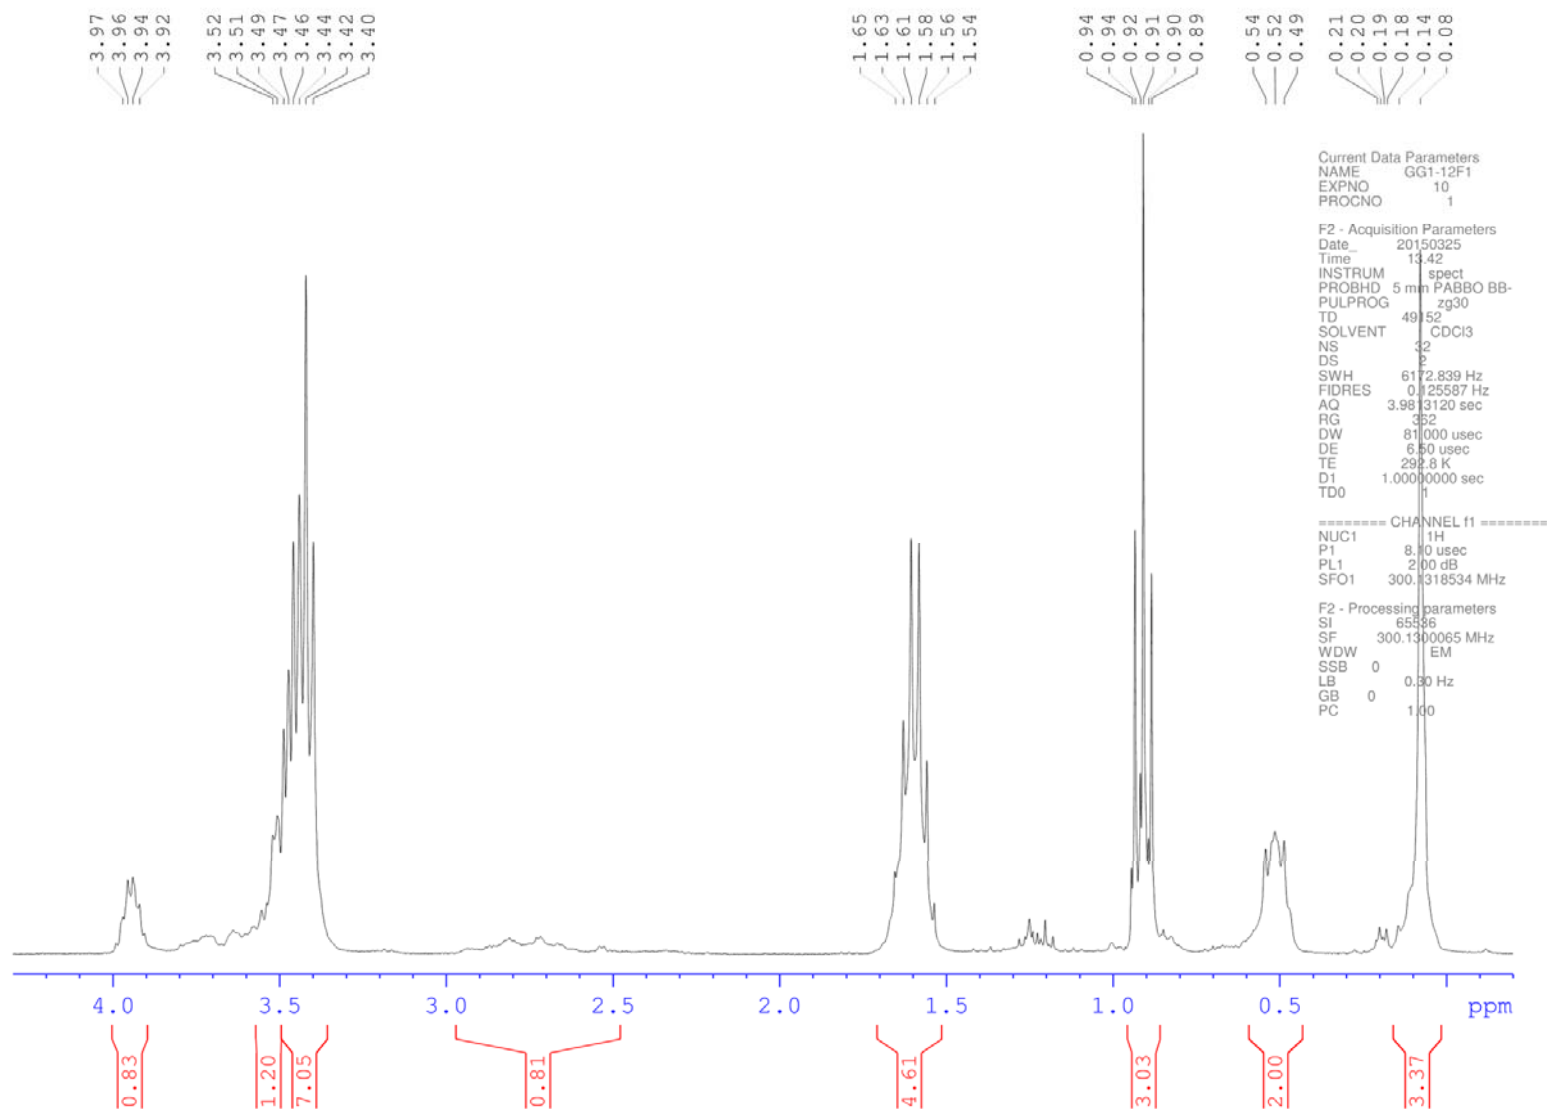

Figure SI\_136: <sup>1</sup>H NMR spectrum of compound 15

# SI\_137

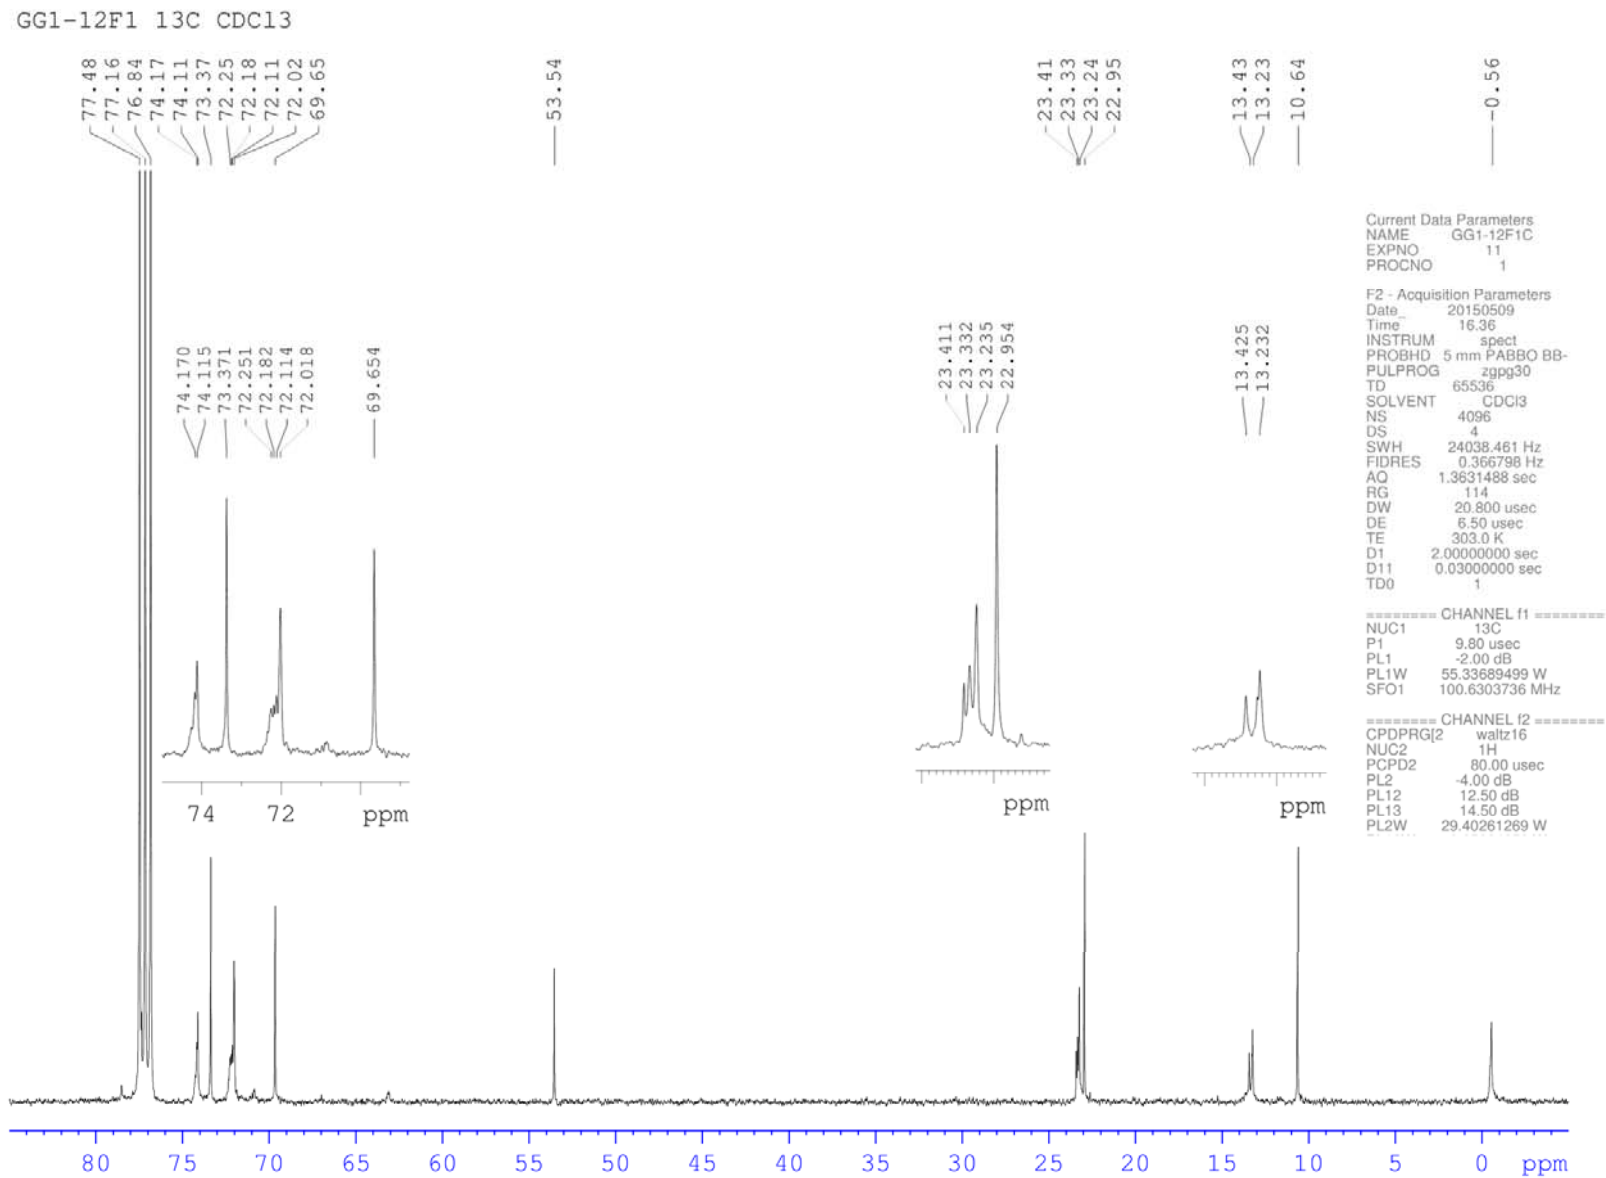

Figure SI\_137: <sup>13</sup>C NMR spectrum of compound 15

# SI\_138

GG1-12F1 DEPT135 CDC13

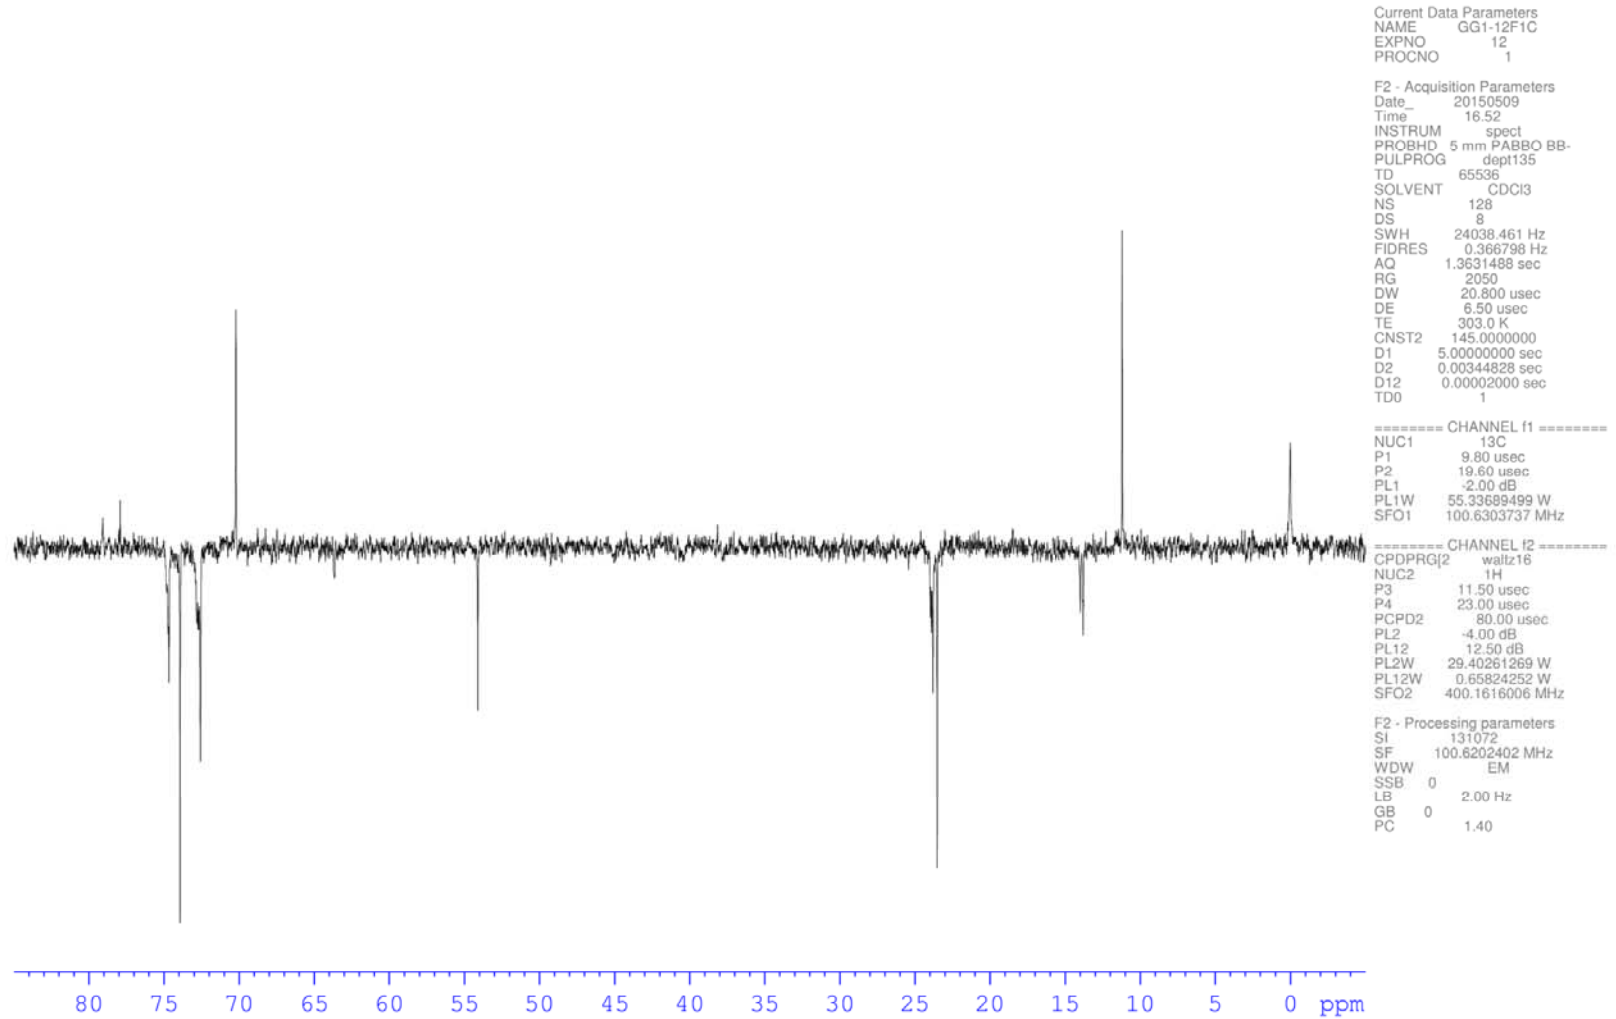

Figure SI\_138: DEPT135 NMR spectrum of compound 15

# SI\_139

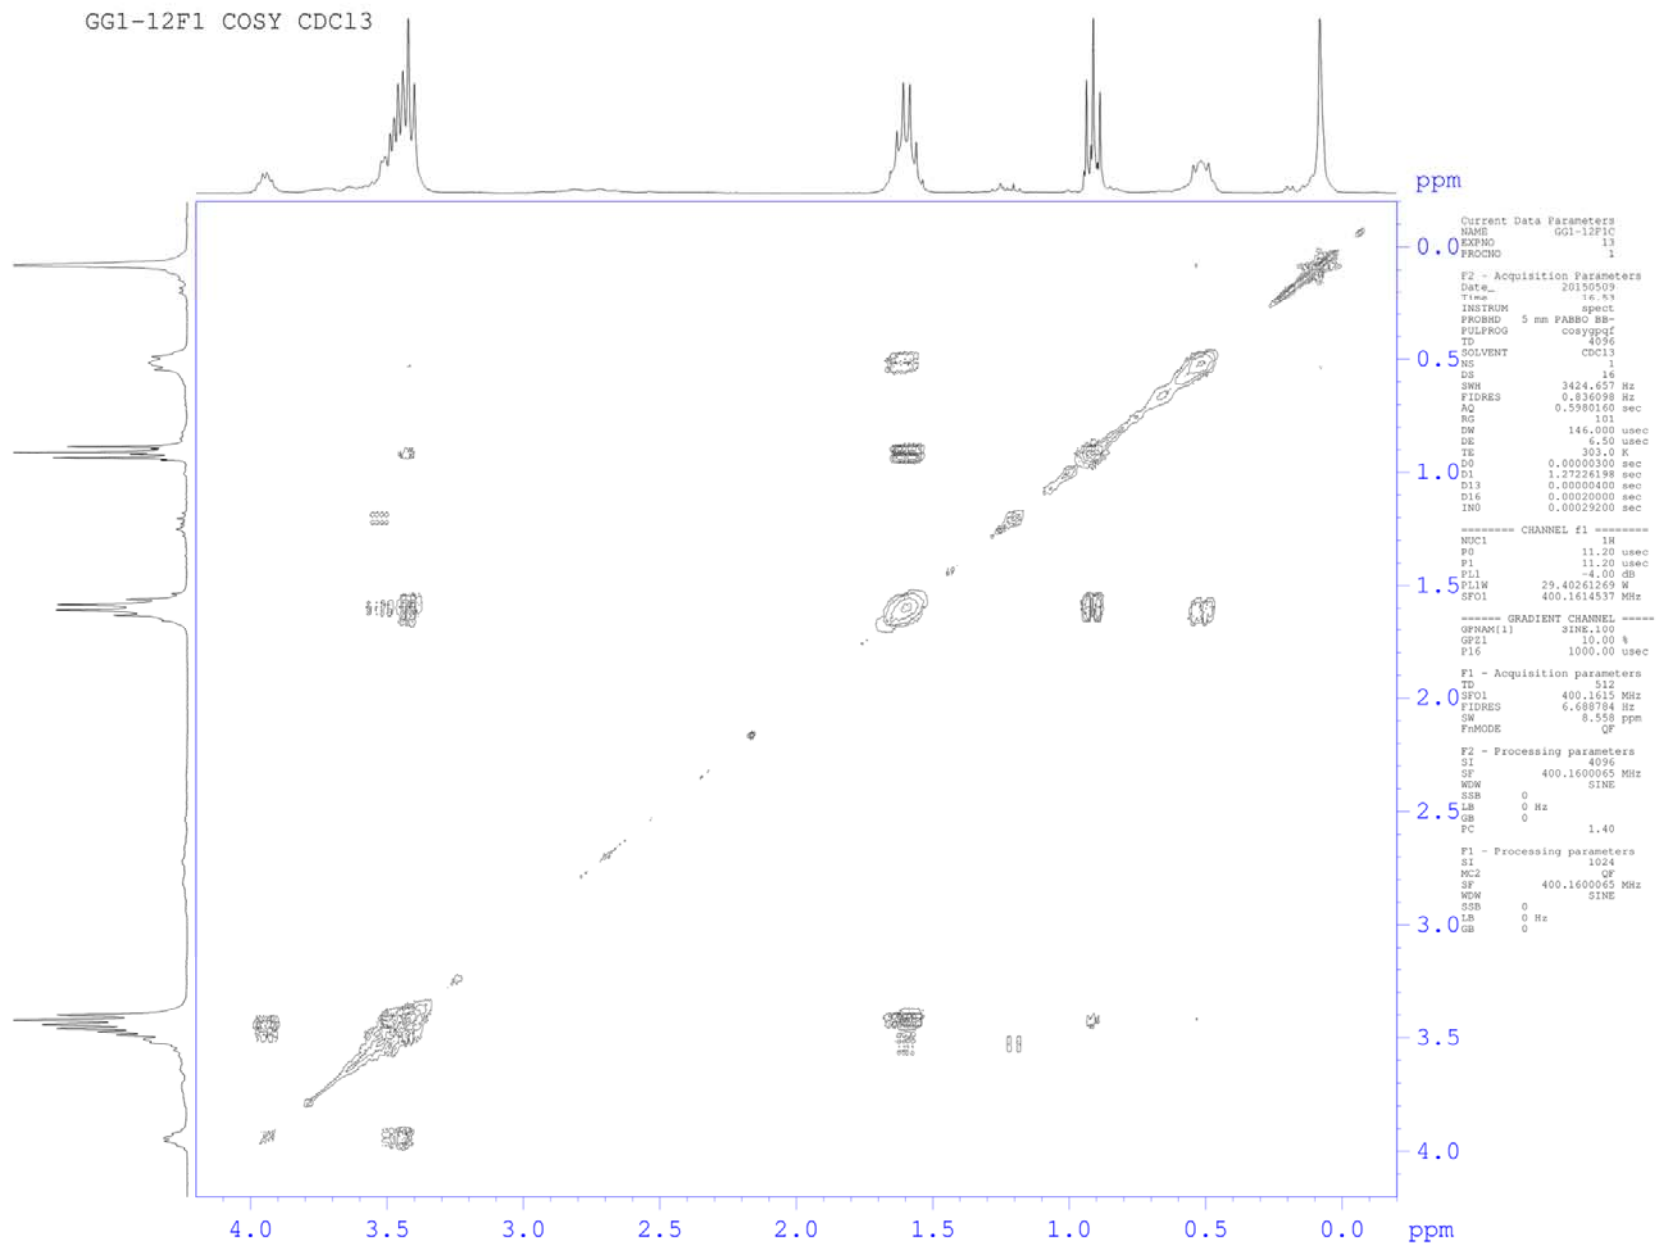

Figure SI\_139:  $^1\text{H}$ - $^1\text{H}$  NMR spectrum of compound 15

# SI\_140

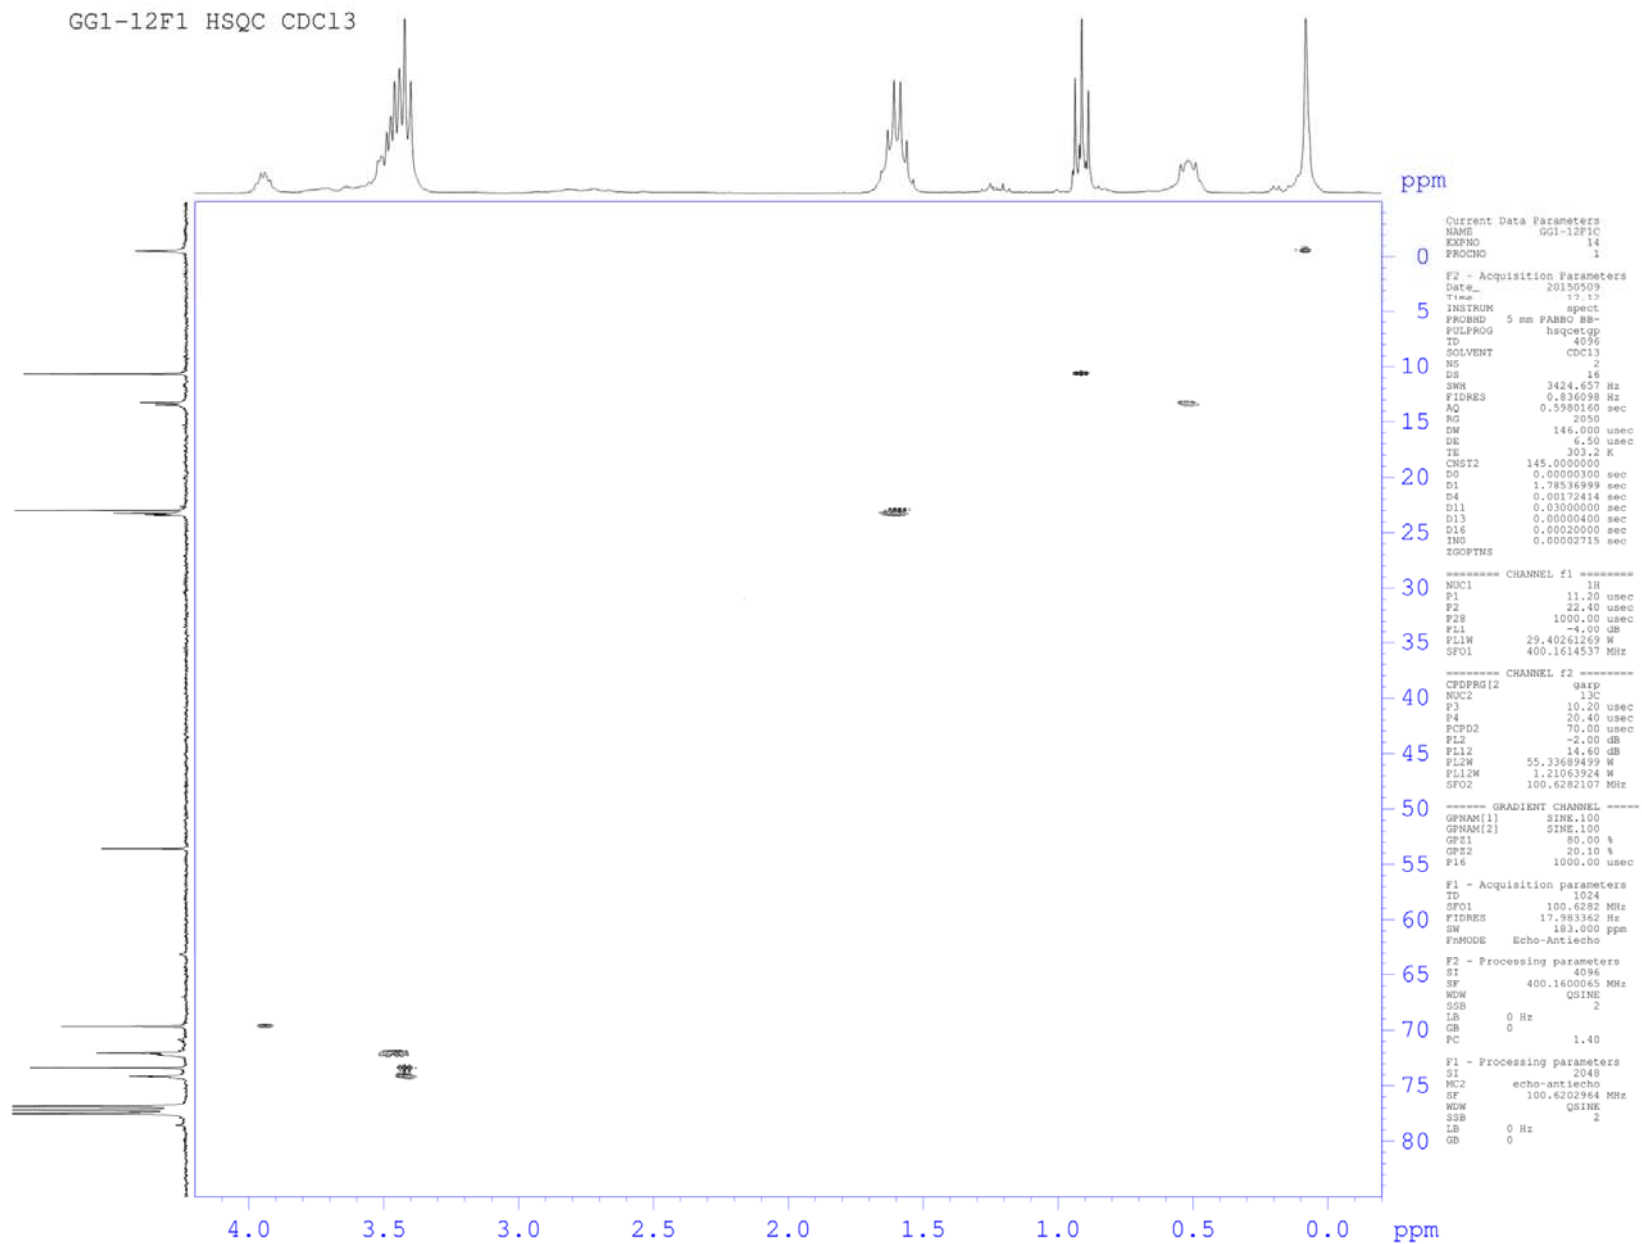

Figure SI\_140: HSQC NMR spectrum of compound 15



# SI\_141

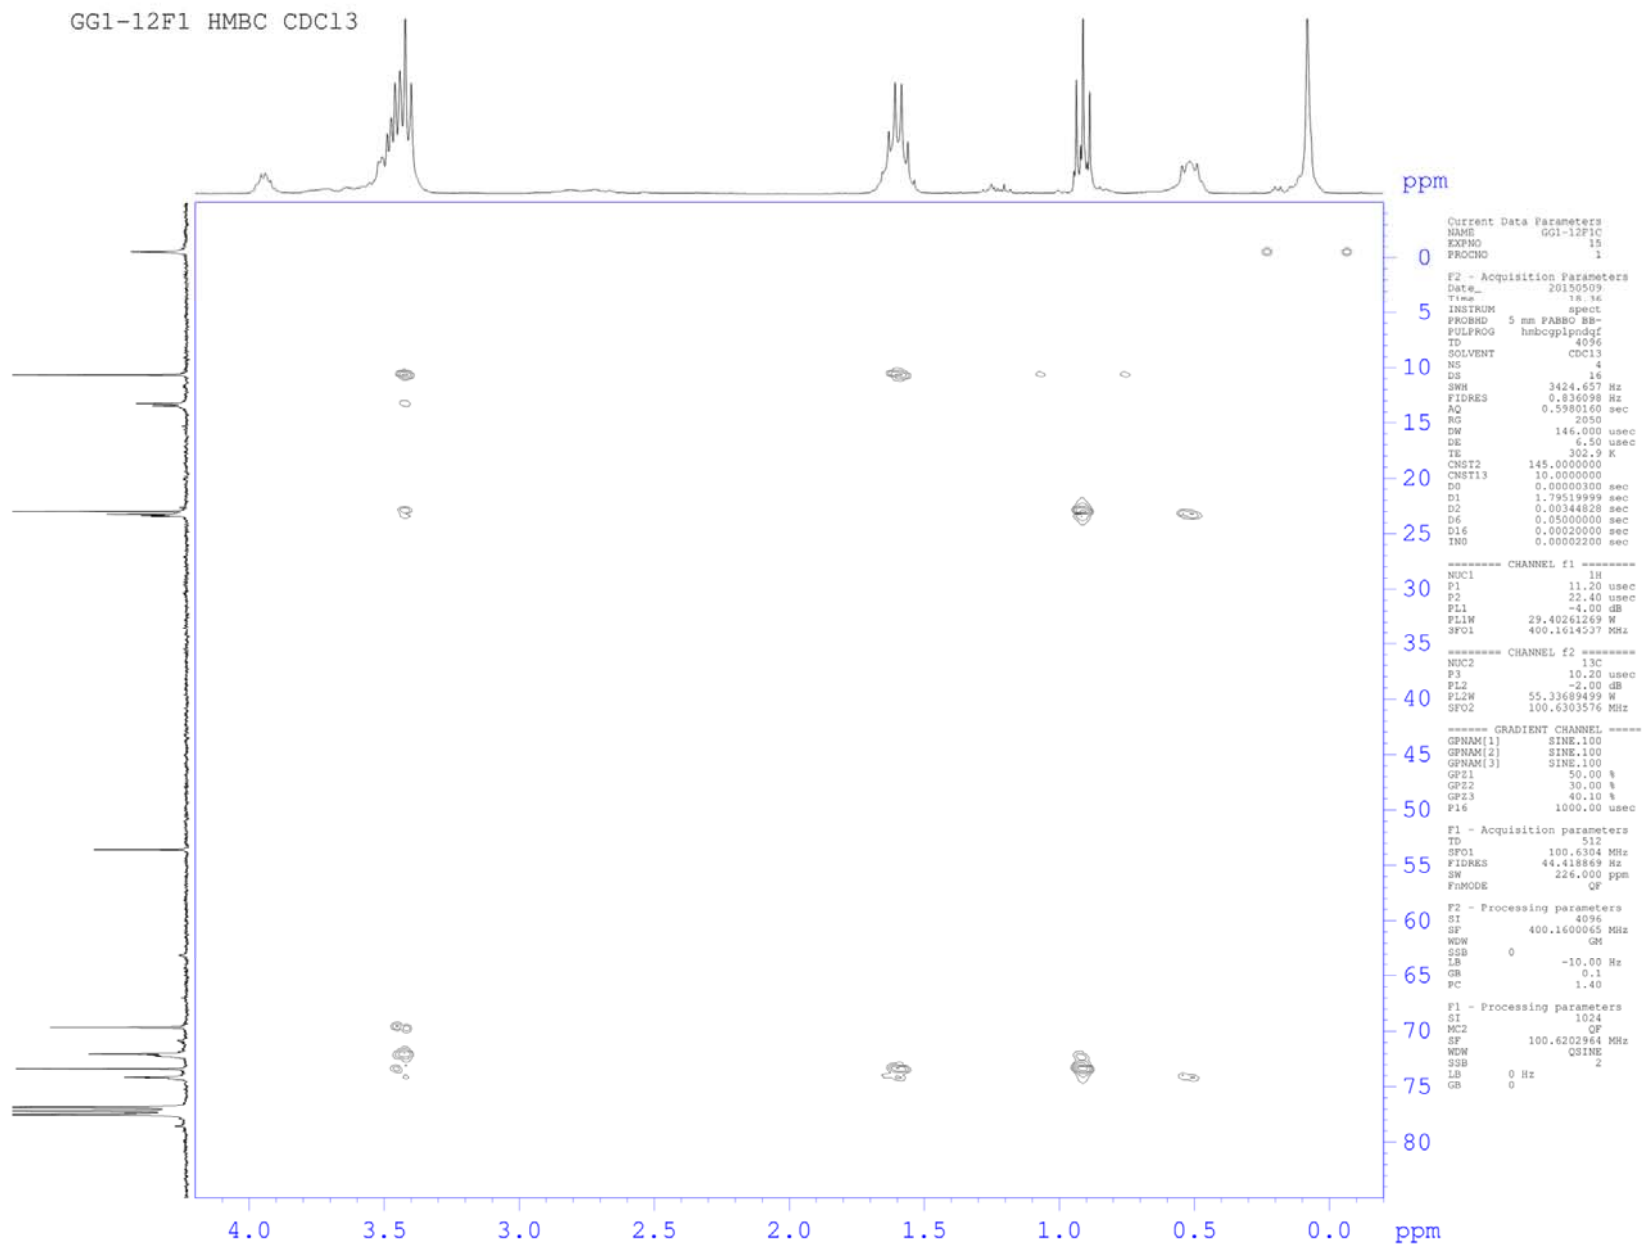

Figure SI\_141: HMBC NMR spectrum of compound 15

C:\Xcalibur\Data\20150507\_GG1-12F1 07/05/2015 11:22:47

20150507 GG1-12F1 #11-18 RT: 0.09-0.15 AV: 8 NL: 2.08E6  
 T: FTMS + p ESI Full ms [150.00-2000.00]

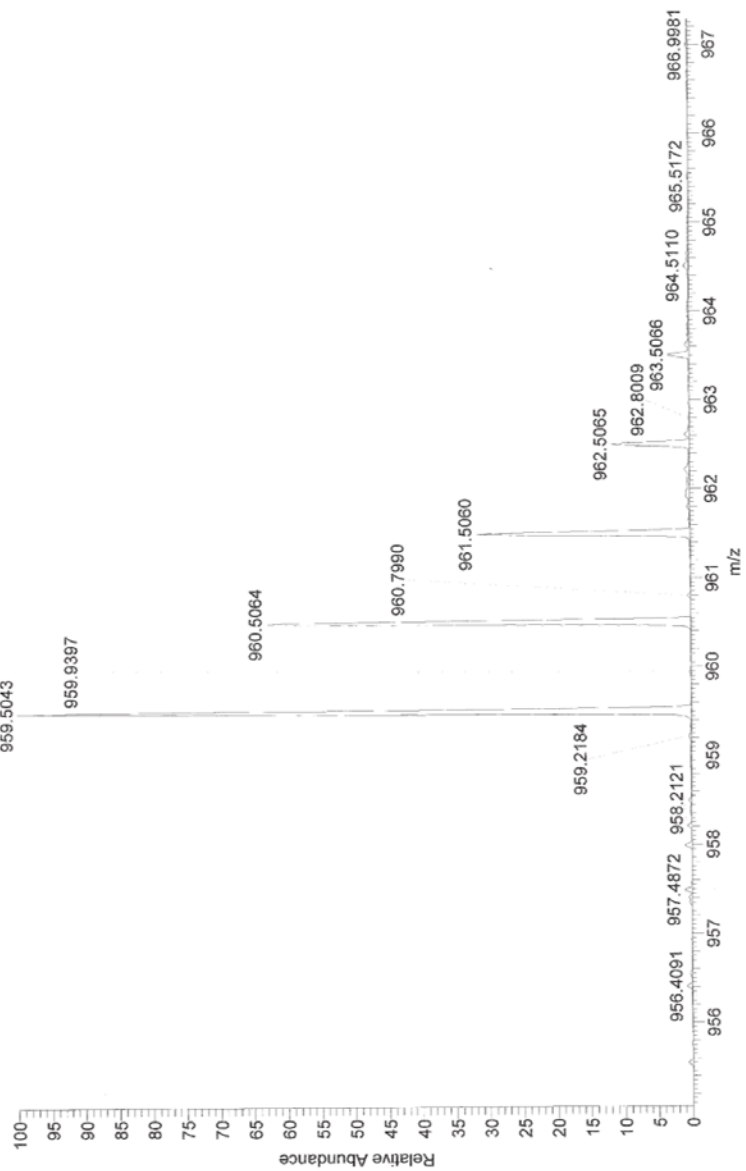

Elemental composition search on mass 959.50

| m/z      | Theo. Mass | Delta (ppm) | REB equiv. | Composition                                                       |
|----------|------------|-------------|------------|-------------------------------------------------------------------|
| 959.5043 | 959.5042   | 0.15        | 0.5        | C <sub>40</sub> H <sub>88</sub> O <sub>16</sub> NaSi <sub>4</sub> |
|          | 959.5038   | 0.58        | 1.5        | C <sub>41</sub> H <sub>84</sub> O <sub>19</sub> NaSi <sub>2</sub> |
|          | 959.5010   | 3.43        | 5.5        | C <sub>44</sub> H <sub>84</sub> O <sub>15</sub> NaSi <sub>3</sub> |
|          | 959.5006   | 3.85        | 6.5        | C <sub>45</sub> H <sub>80</sub> O <sub>18</sub> NaSi              |

Figure SI\_142: HRMS spectrum of compound 15

# SI\_143

## E. Reference $^1\text{H}$ NMR ( $\text{CDCl}_3$ ) spectra of GPTMS, GPTES and PECS

GPTMS  $\text{CDCl}_3$  RMN  $^1\text{H}$

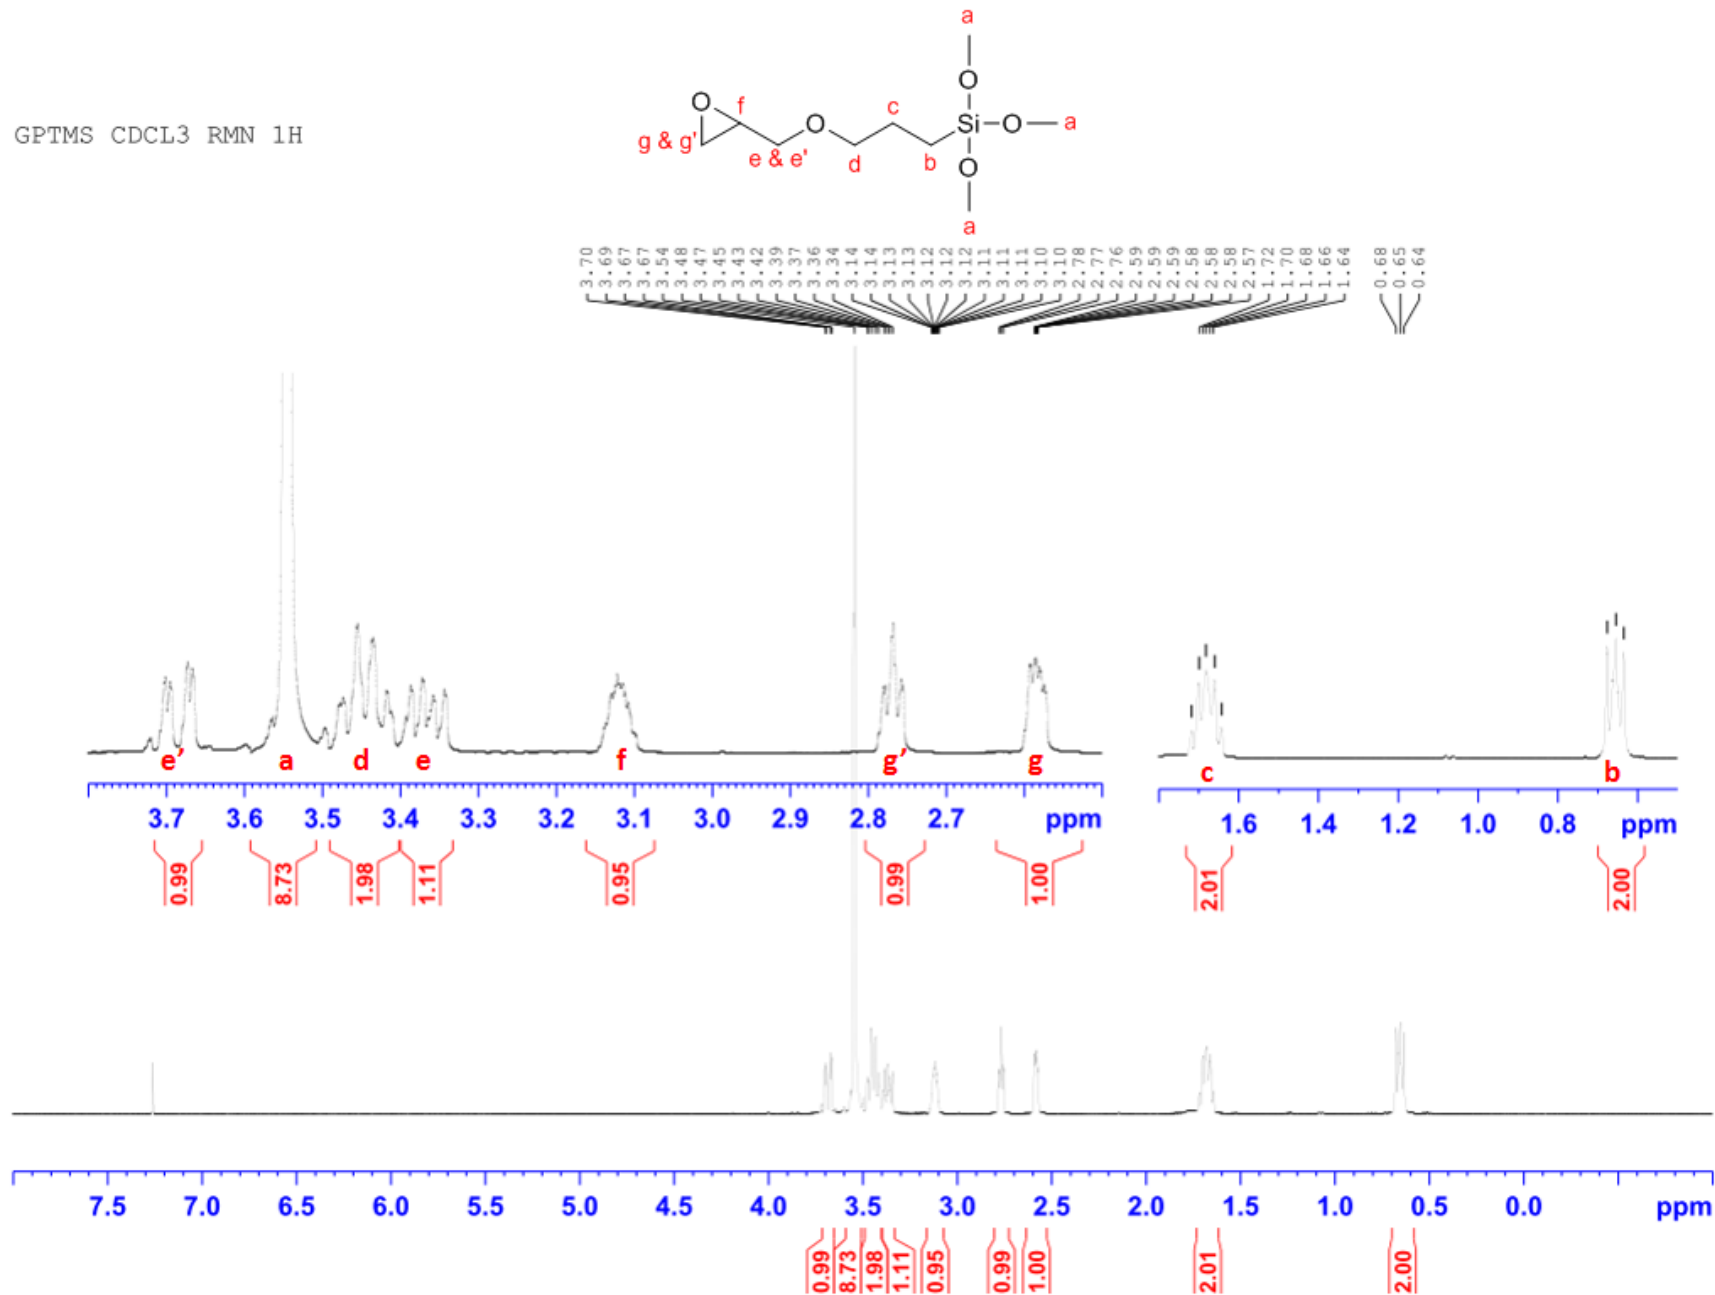

Figure SI\_143:  $^1\text{H}$  NMR spectrum of GPTMS

# SI\_144

GPTES CDCL3 RMN 1H

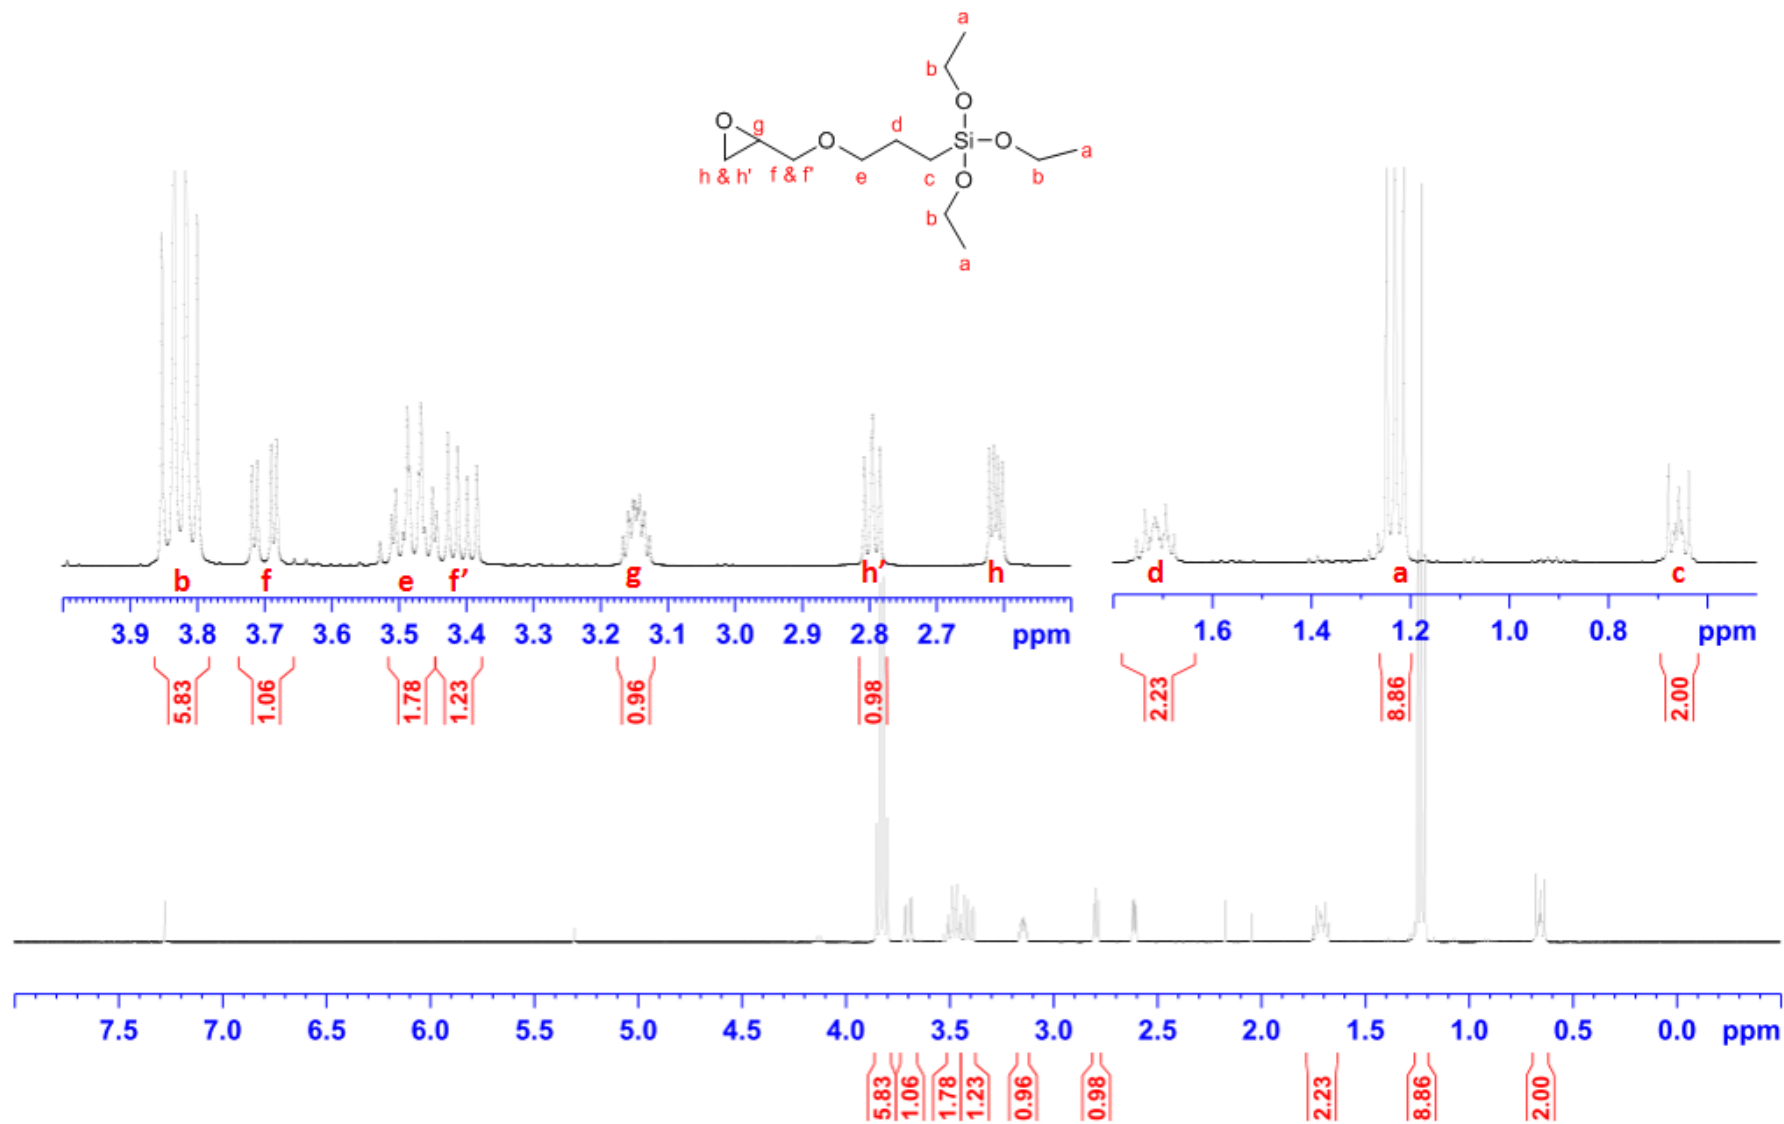

Figure SI\_144: <sup>1</sup>H NMR spectrum of GPTES

# SI\_145

PECS CDCL3 RMN 1H

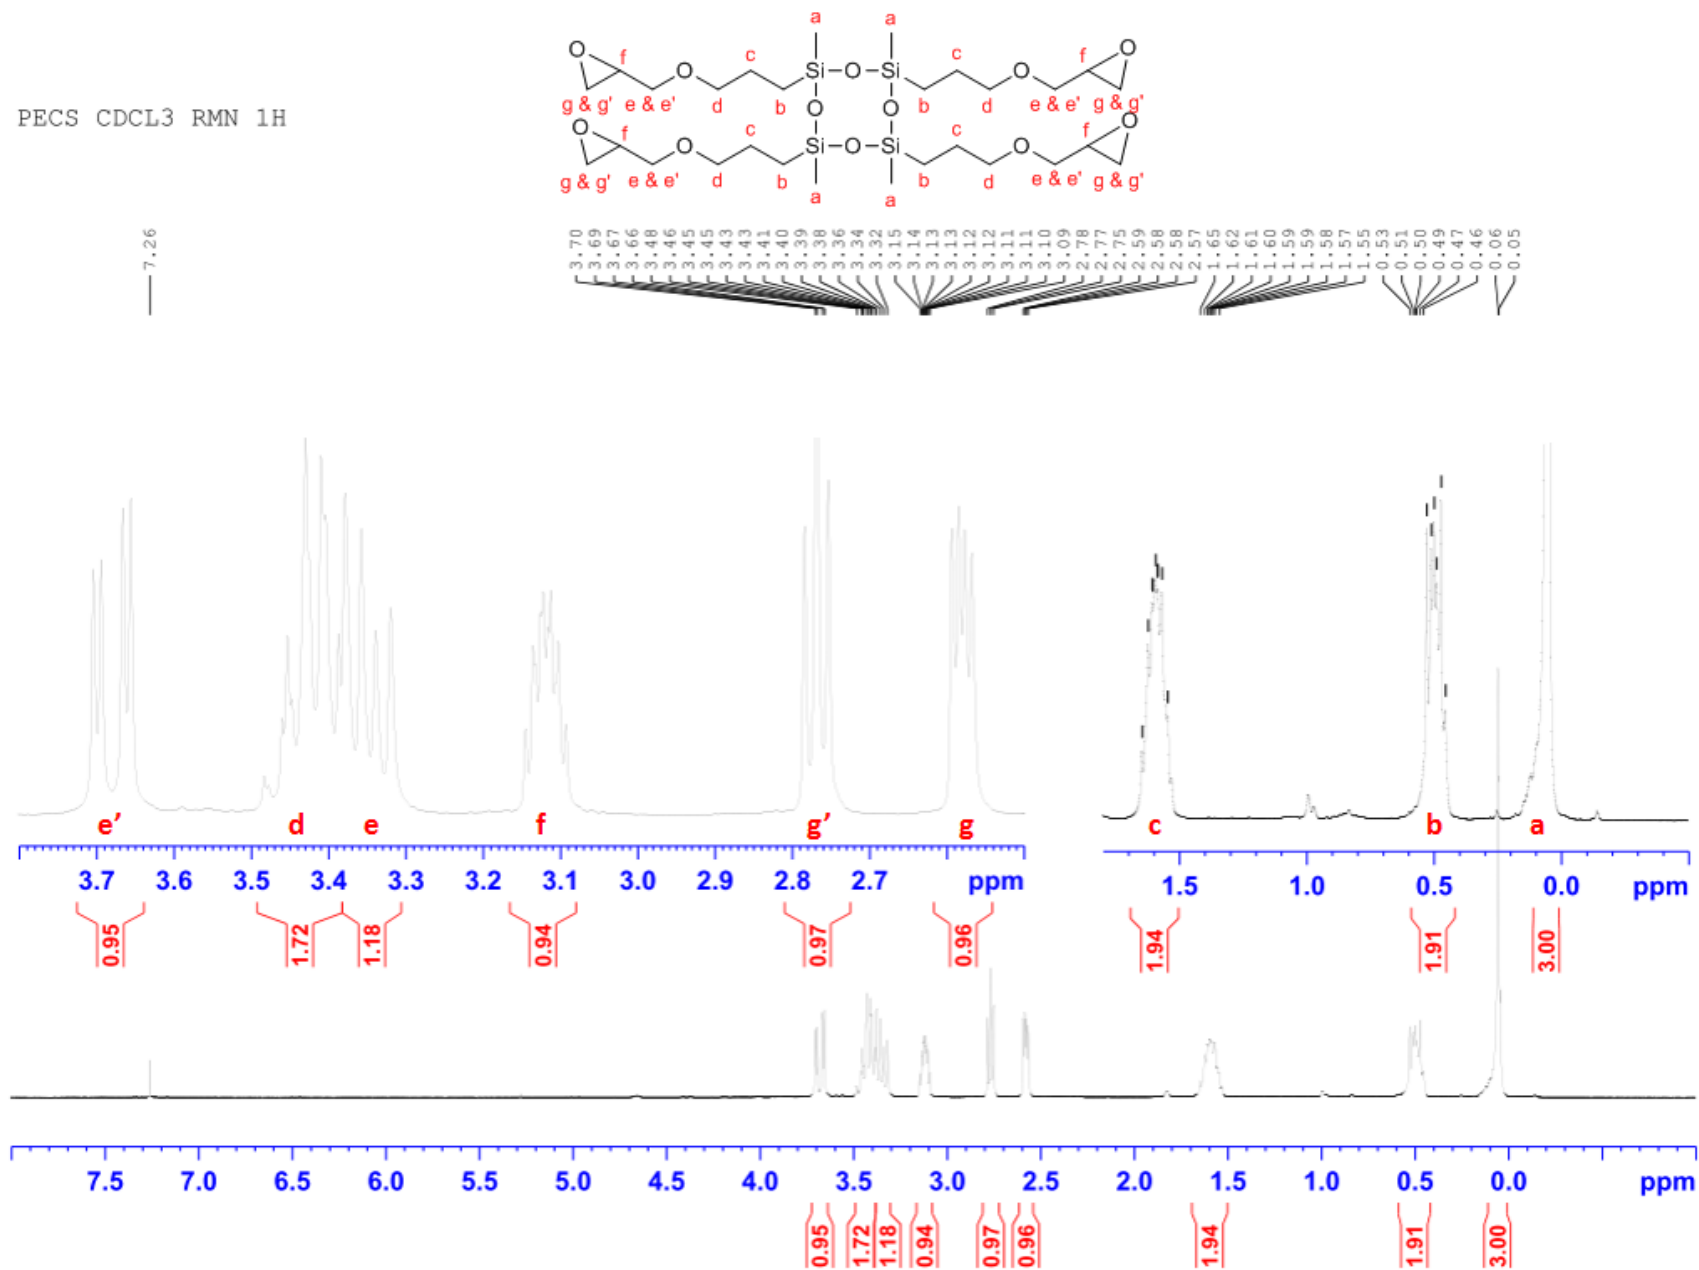

Figure SI\_145: <sup>1</sup>H NMR spectrum of PECS

## E. COMPLEMENTARY SPECTRA CITED IN THE MAIN TEXT

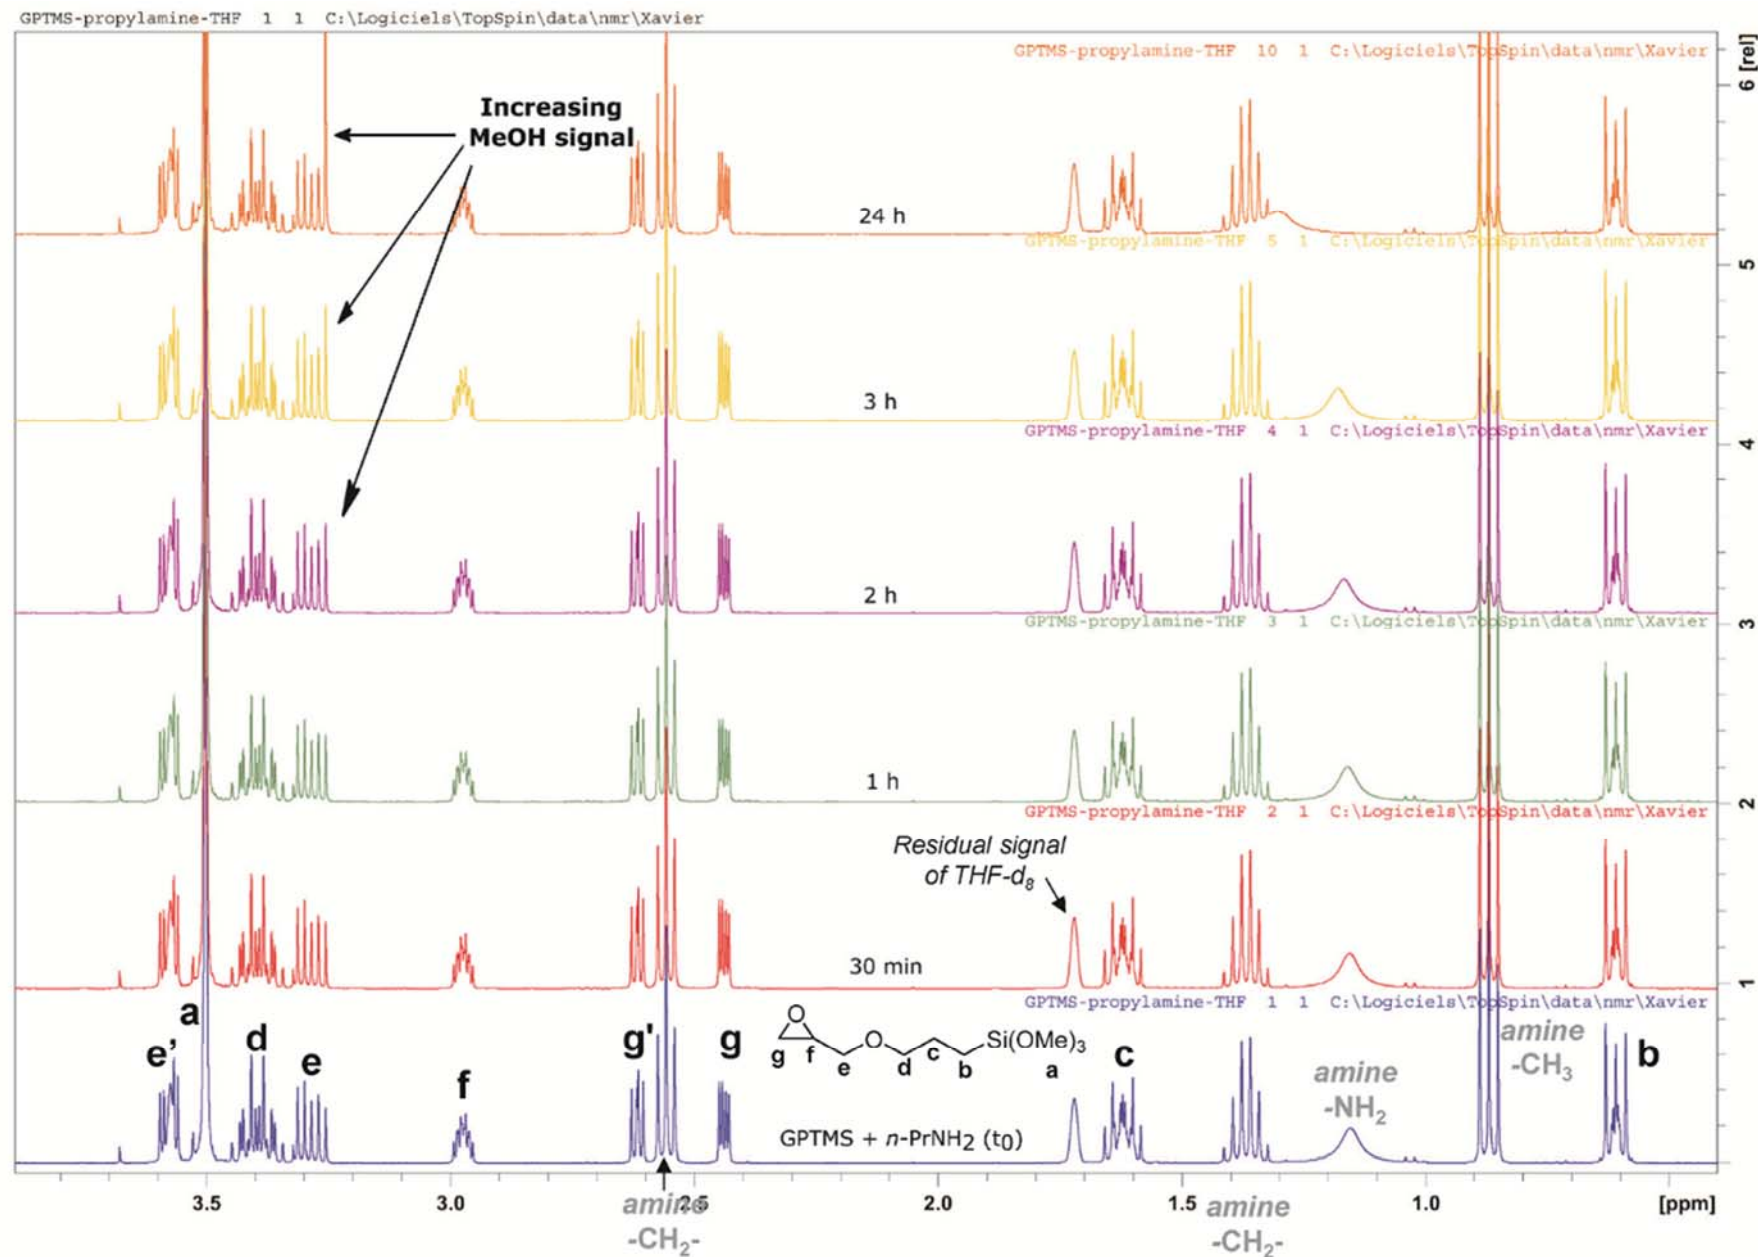Figure SI\_146: <sup>1</sup>H NMR monitoring of the reaction between *n*-propylamine and GTPMS in THF-*d*<sub>8</sub> and at 40 °C.

# SI\_147

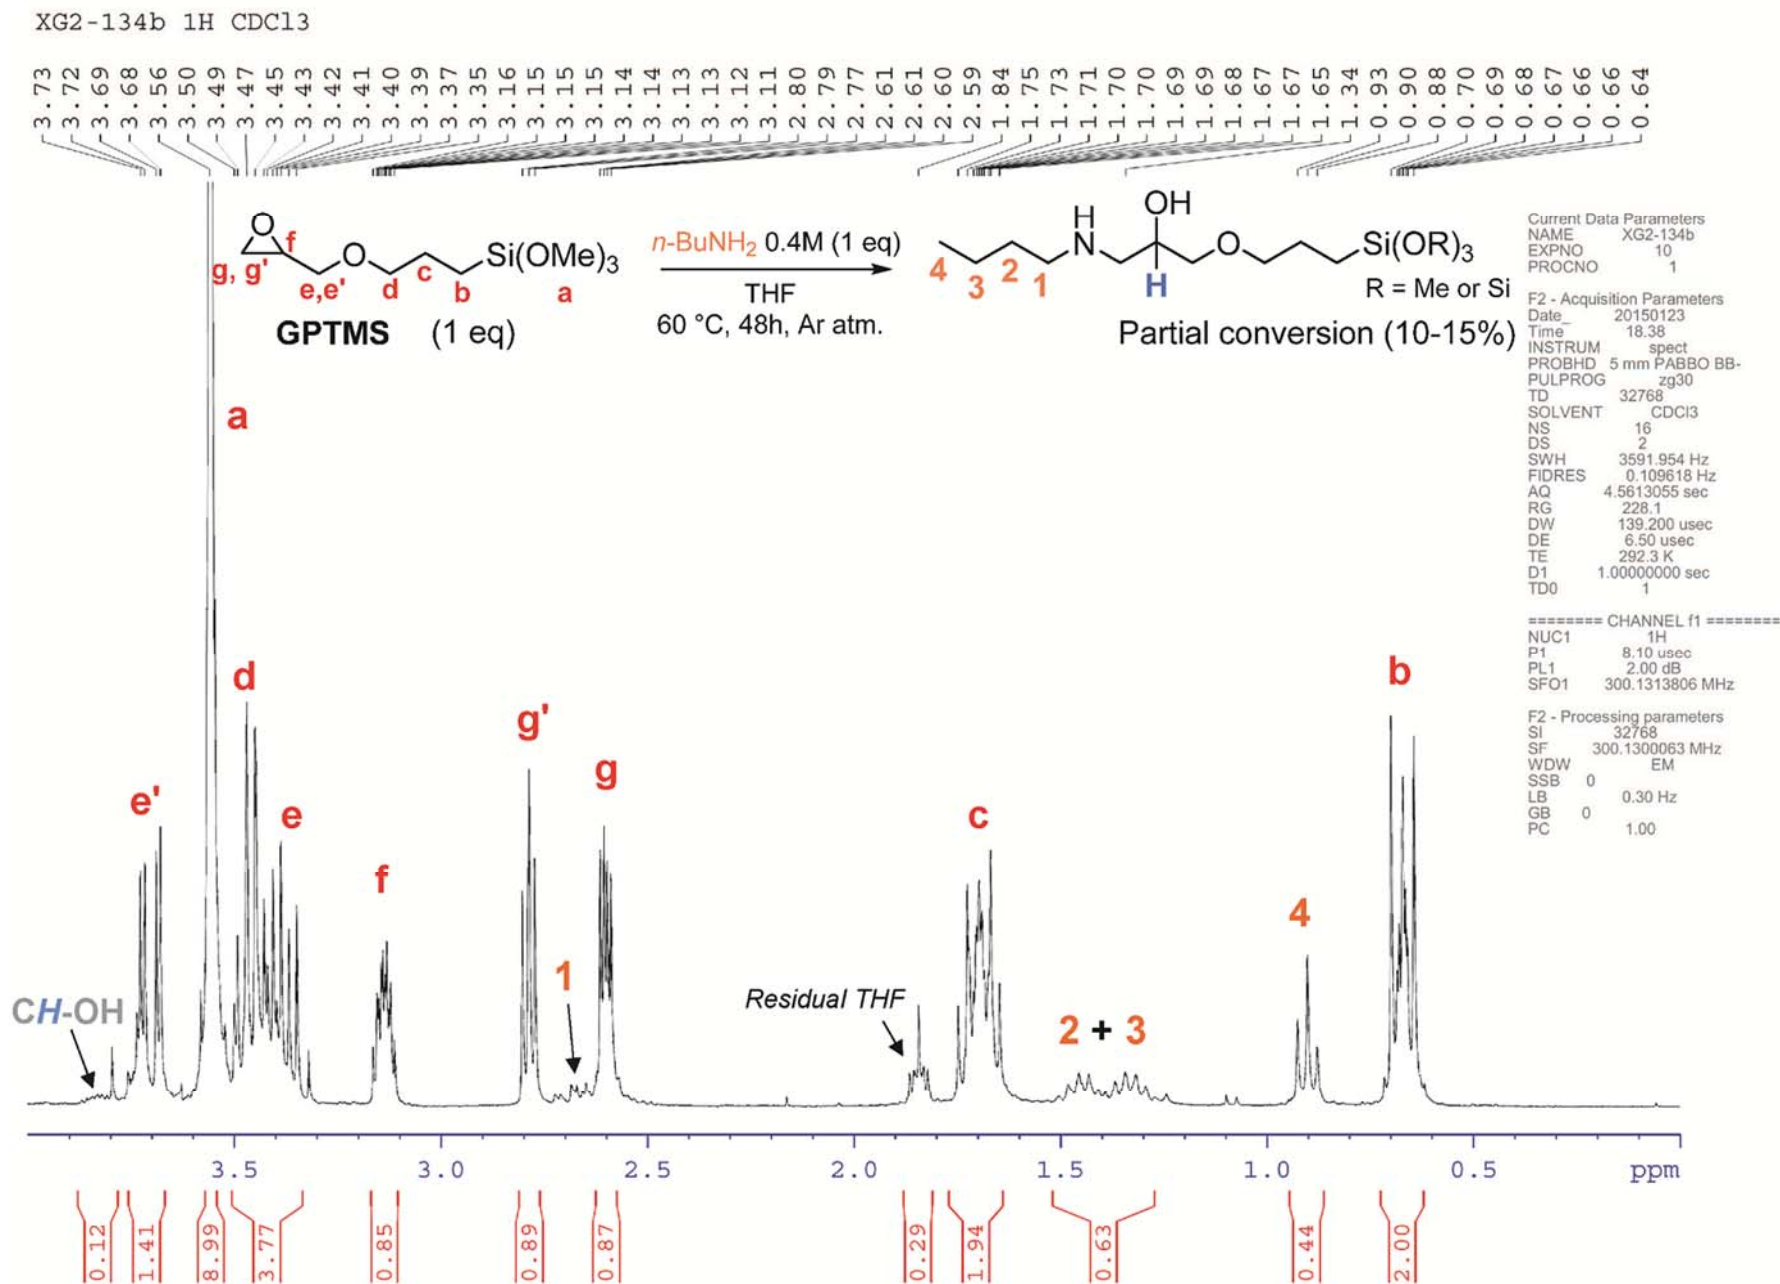

Figure SI\_147:  $^1\text{H}$  NMR spectrum of the crude mixture of the reaction between  $n$ -butylamine and GPTMS in THF (60 °C, 48h). (Scheme 8 (a.) in article)



# SI\_148

XG2-137b D2O/NaOD

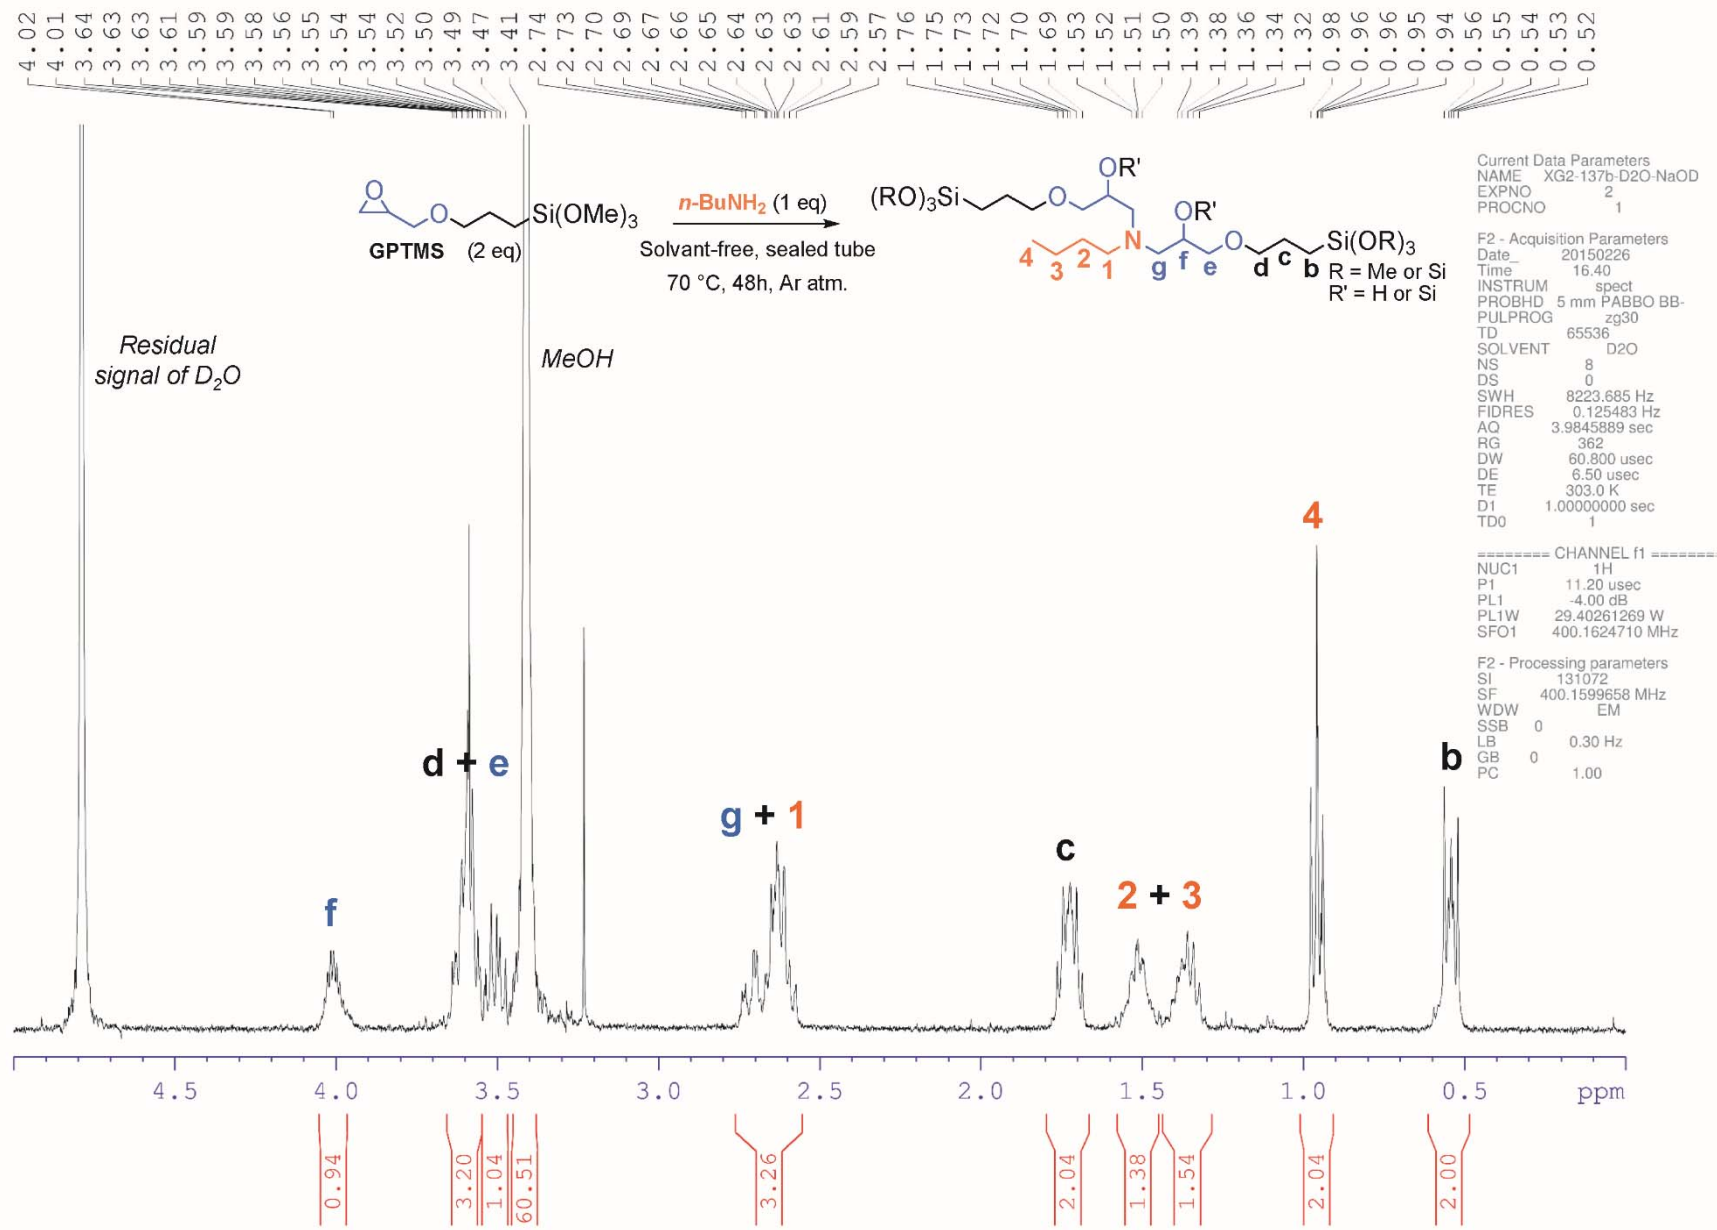

Figure SI\_148: <sup>1</sup>H NMR spectrum of the dissolved crude material of the reaction between *n*-butylamine and GPTMS in solvent-free conditions (70 °C, 48h).



# SI\_149

XG2-165b CDCl3 1H (5.5h)

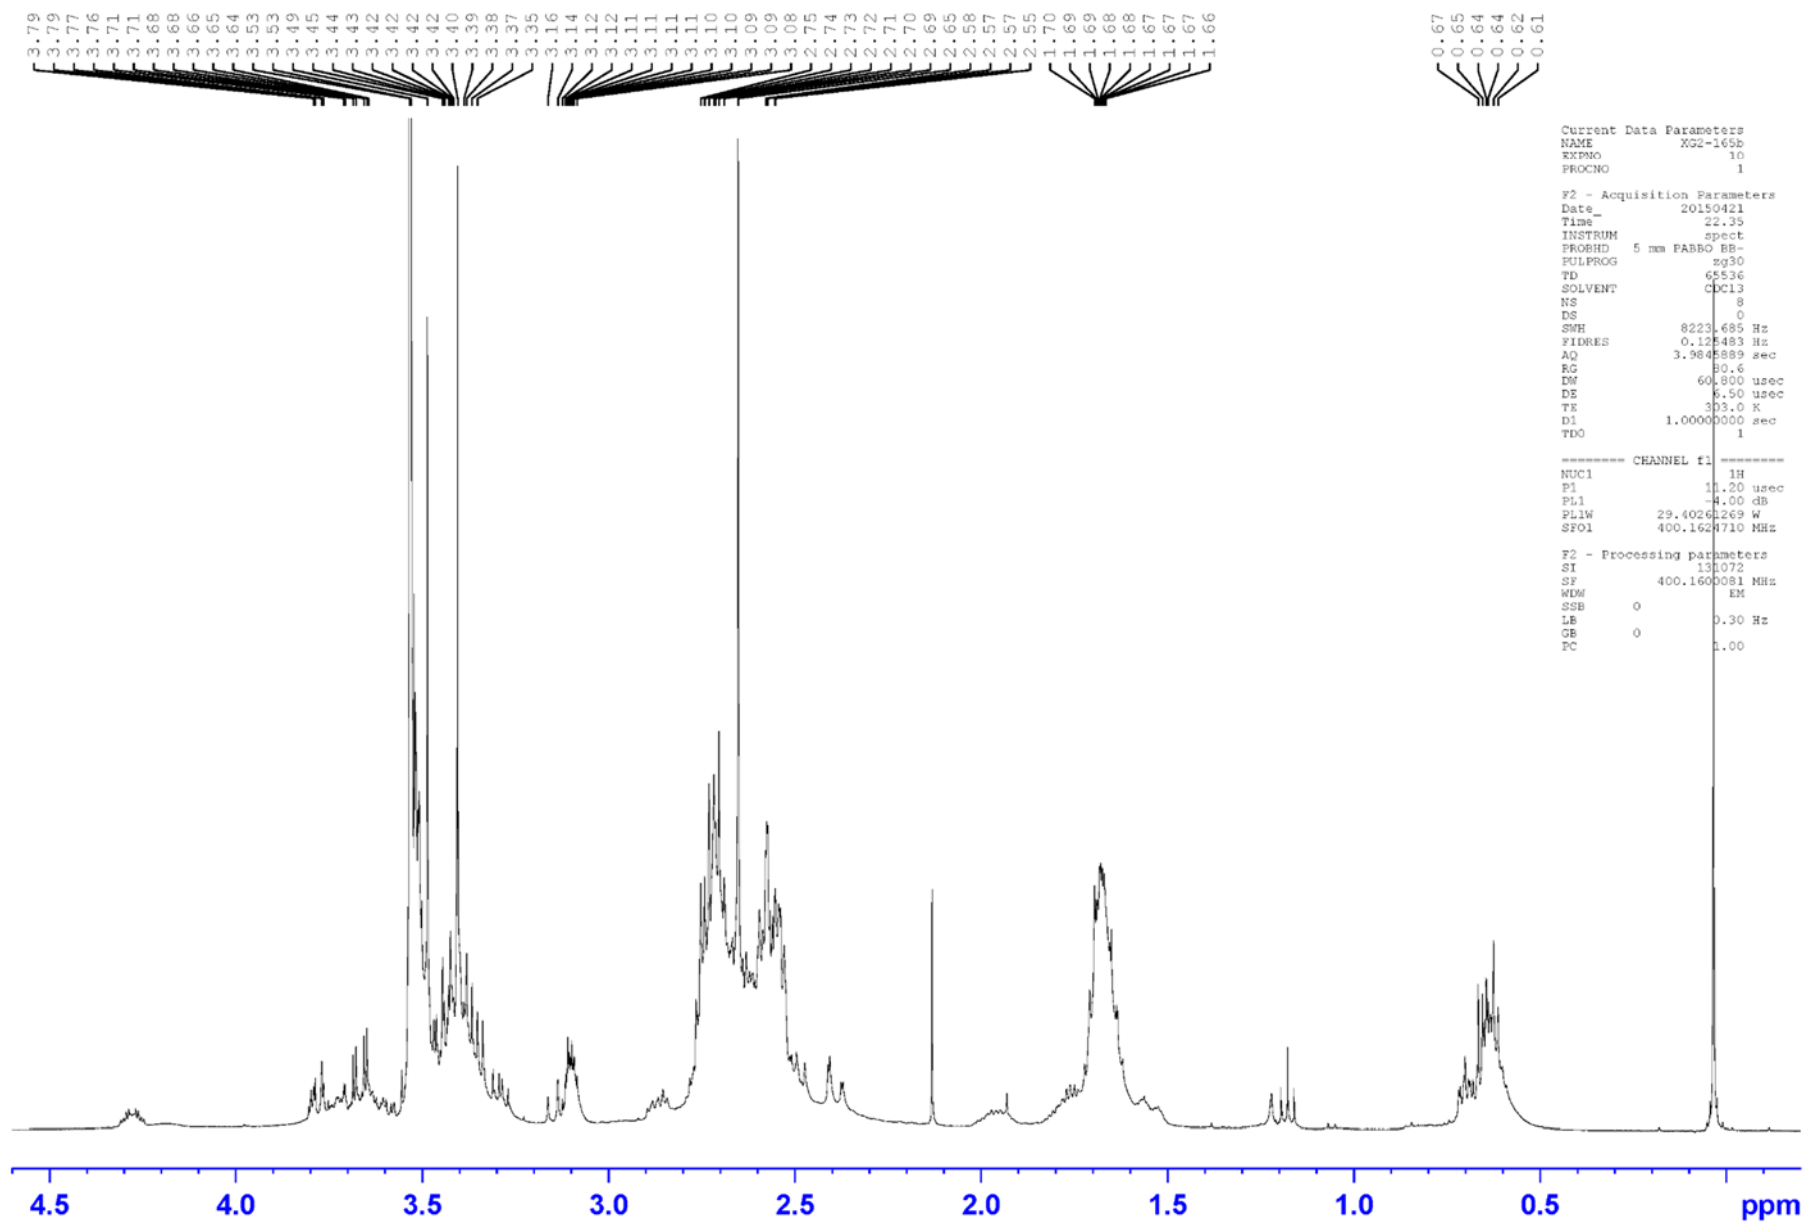

Figure SI\_149: <sup>1</sup>H NMR spectrum of the mixture of 4 & 5 issued of the reaction between cyclam and GPTMS in toluene (reflux, 5.5h). (Scheme 3 (b.) in article)

# SI\_150

XG2-165b CDC13 13C (5.5h)

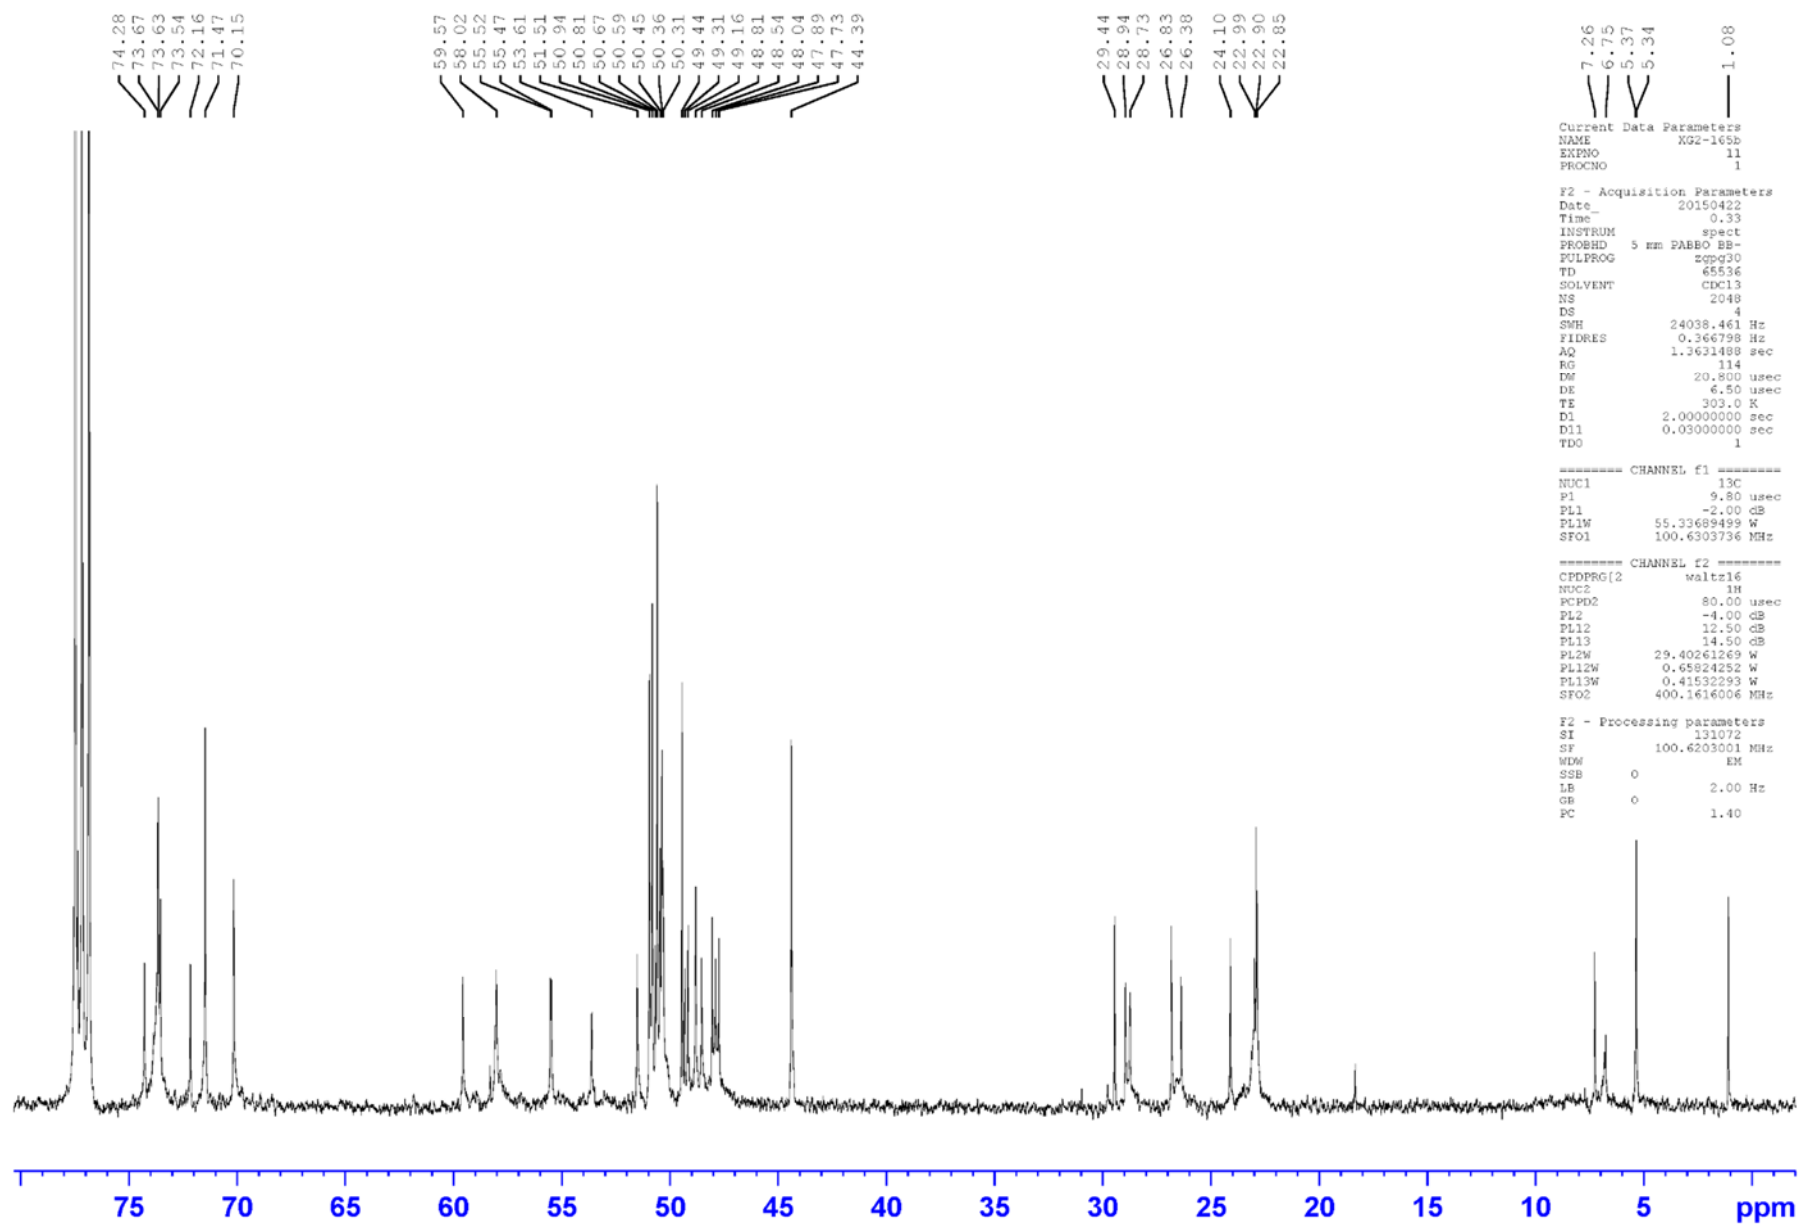

Figure SI\_150:  $^{13}\text{C}$  NMR spectrum of the mixture of 4 & 5 issued of the reaction between cyclam and GPTMS in toluene (reflux, 5.5h). (Scheme 3 (b.) in article)

# SI\_151

C:\Xcalibur\Data\Iso310-JLB\Xg2144b  
ci nh3

2/24/2015 9:36:36 AM

Xg2144b #68-79 RT: 0.58-0.68 AV: 6 NL: 5.98E8  
F: + c Full ms [ 54.00-1050.00]

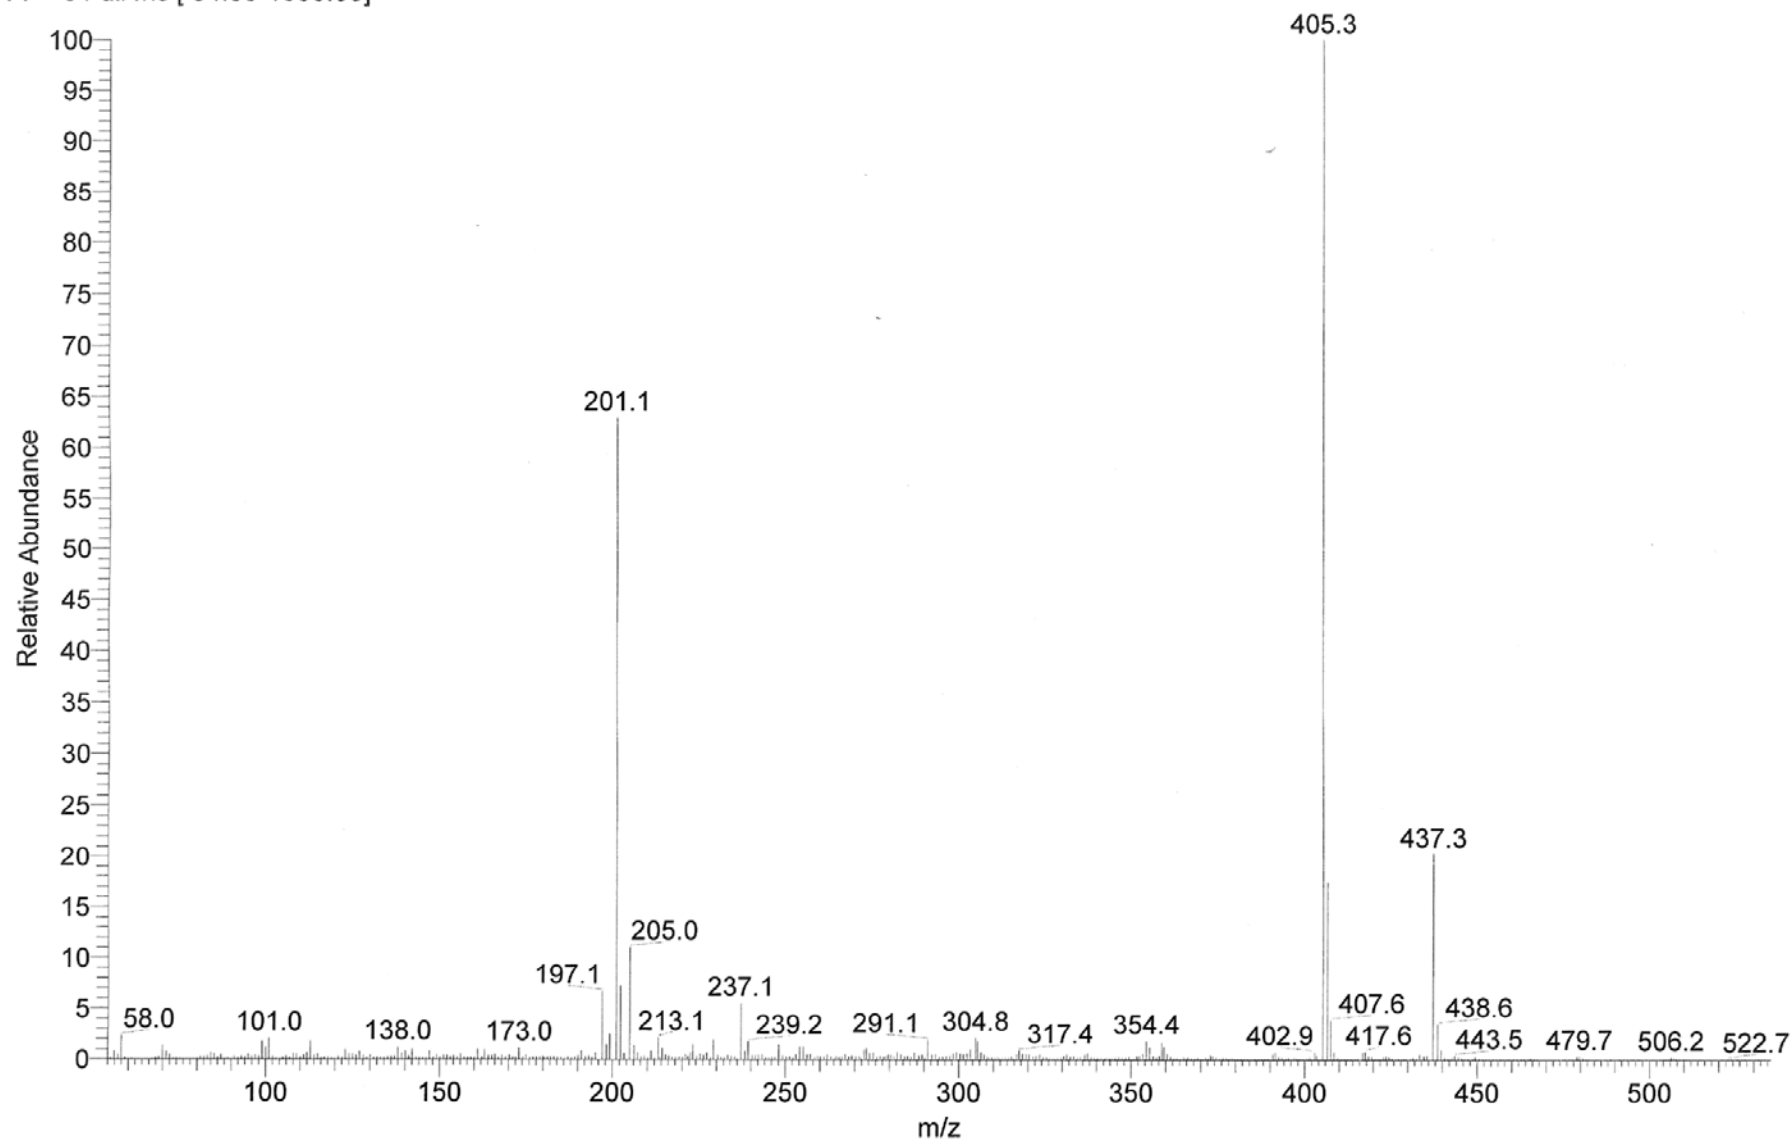

Figure SI\_151: MS-Cl spectrum of the mixture of 4 & 5 issued of the reaction between cyclam and GPTMS in toluene (reflux, 5.5h). (Scheme 3 (b.) in article)

# SI\_152

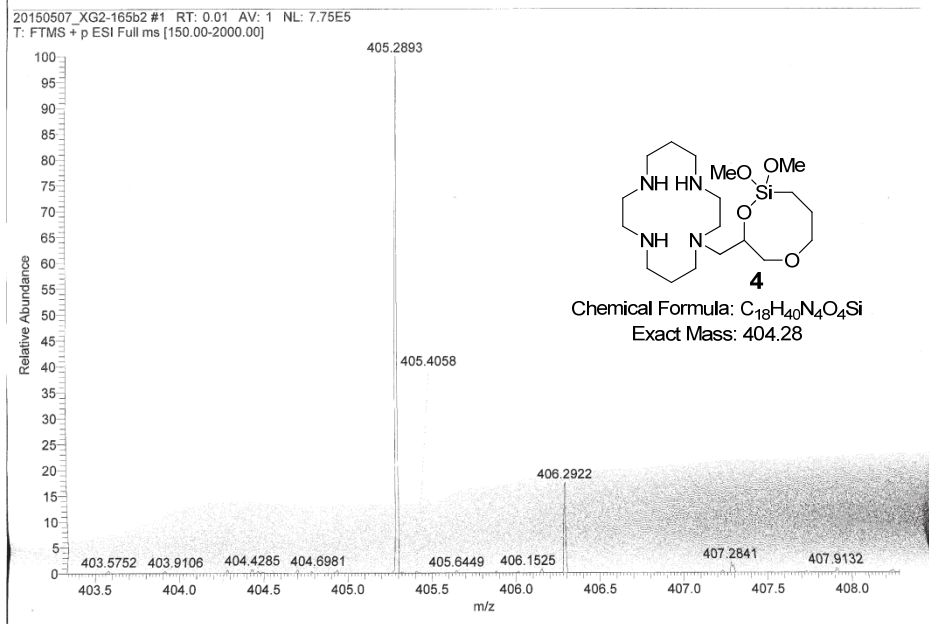

Elemental composition search on mass 405.29

| m/z      | Theo. Mass | Delta (ppm) | RDB equiv. | Composition              |
|----------|------------|-------------|------------|--------------------------|
| 405.2893 | 405.2894   | -0.23       | 3.0        | $C_{19}H_{40}O_5NaSi$    |
|          | 405.2892   | 0.45        | 1.5        | $C_{18}H_{41}O_4N_4Si$   |
|          | 405.2887   | 1.58        | 11.0       | $C_{25}H_{35}N_5$        |
|          | 405.2900   | -1.73       | 10.5       | $C_{27}H_{37}O_2N_2$     |
|          | 405.2905   | -2.85       | 6.5        | $C_{19}H_{37}N_8Si$      |
|          | 405.2905   | -2.87       | 1.0        | $C_{20}H_{43}O_5NSi$     |
|          | 405.2881   | 3.08        | 3.5        | $C_{17}H_{38}N_8NaSi$    |
|          | 405.2908   | -3.54       | 2.5        | $C_{21}H_{42}O_2N_2NaSi$ |
|          | 405.2908   | -3.66       | -0.5       | $C_{14}H_{38}O_4NaNa$    |
|          | 405.2878   | 3.76        | 2.0        | $C_{16}H_{39}O_3N_7Si$   |
|          | 405.2876   | 4.21        | 7.5        | $C_{25}H_{38}O_2Na$      |
|          | 405.2874   | 4.88        | 6.0        | $C_{24}H_{39}O_4N$       |

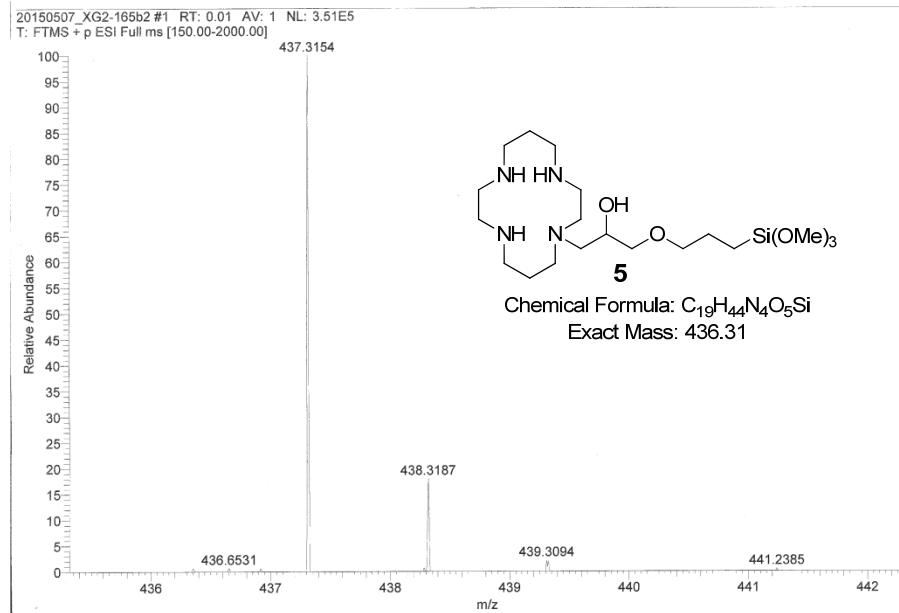

Elemental composition search on mass 437.32

| m/z      | Theo. Mass | Delta (ppm) | RDB equiv. | Composition              |
|----------|------------|-------------|------------|--------------------------|
| 437.3154 | 437.3154   | -0.01       | 0.5        | $C_{19}H_{45}O_5N_4Si$   |
|          | 437.3156   | -0.64       | 2.0        | $C_{20}H_{44}O_2N_5NaSi$ |
|          | 437.3149   | 1.05        | 10.0       | $C_{26}H_{39}ON_5$       |
|          | 437.3163   | -2.02       | 9.5        | $C_{28}H_{41}O_2N_2$     |
|          | 437.3143   | 2.43        | 2.5        | $C_{18}H_{42}ON_8NaSi$   |
|          | 437.3140   | 3.06        | 1.0        | $C_{17}H_{43}O_4N_7Si$   |
|          | 437.3167   | -3.07       | 5.5        | $C_{20}H_{41}ON_8Si$     |
|          | 437.3167   | -3.08       | 0.0        | $C_{21}H_{47}O_6NSi$     |
|          | 437.3138   | 3.48        | 6.5        | $C_{26}H_{42}O_2N_2Na$   |
|          | 437.3170   | -3.71       | 1.5        | $C_{22}H_{46}O_3N_2NaSi$ |
|          | 437.3136   | 4.10        | 5.0        | $C_{25}H_{43}O_5N$       |
|          | 437.3136   | 4.12        | 10.5       | $C_{24}H_{37}N_8$        |

Figure SI\_152: HRMS-ESI spectra of the molecular peaks ( $[M+H]^+$ ) of compounds 4 (left) & 5 (right).

# SI\_153

XG2-165b2 CDCL3 1H

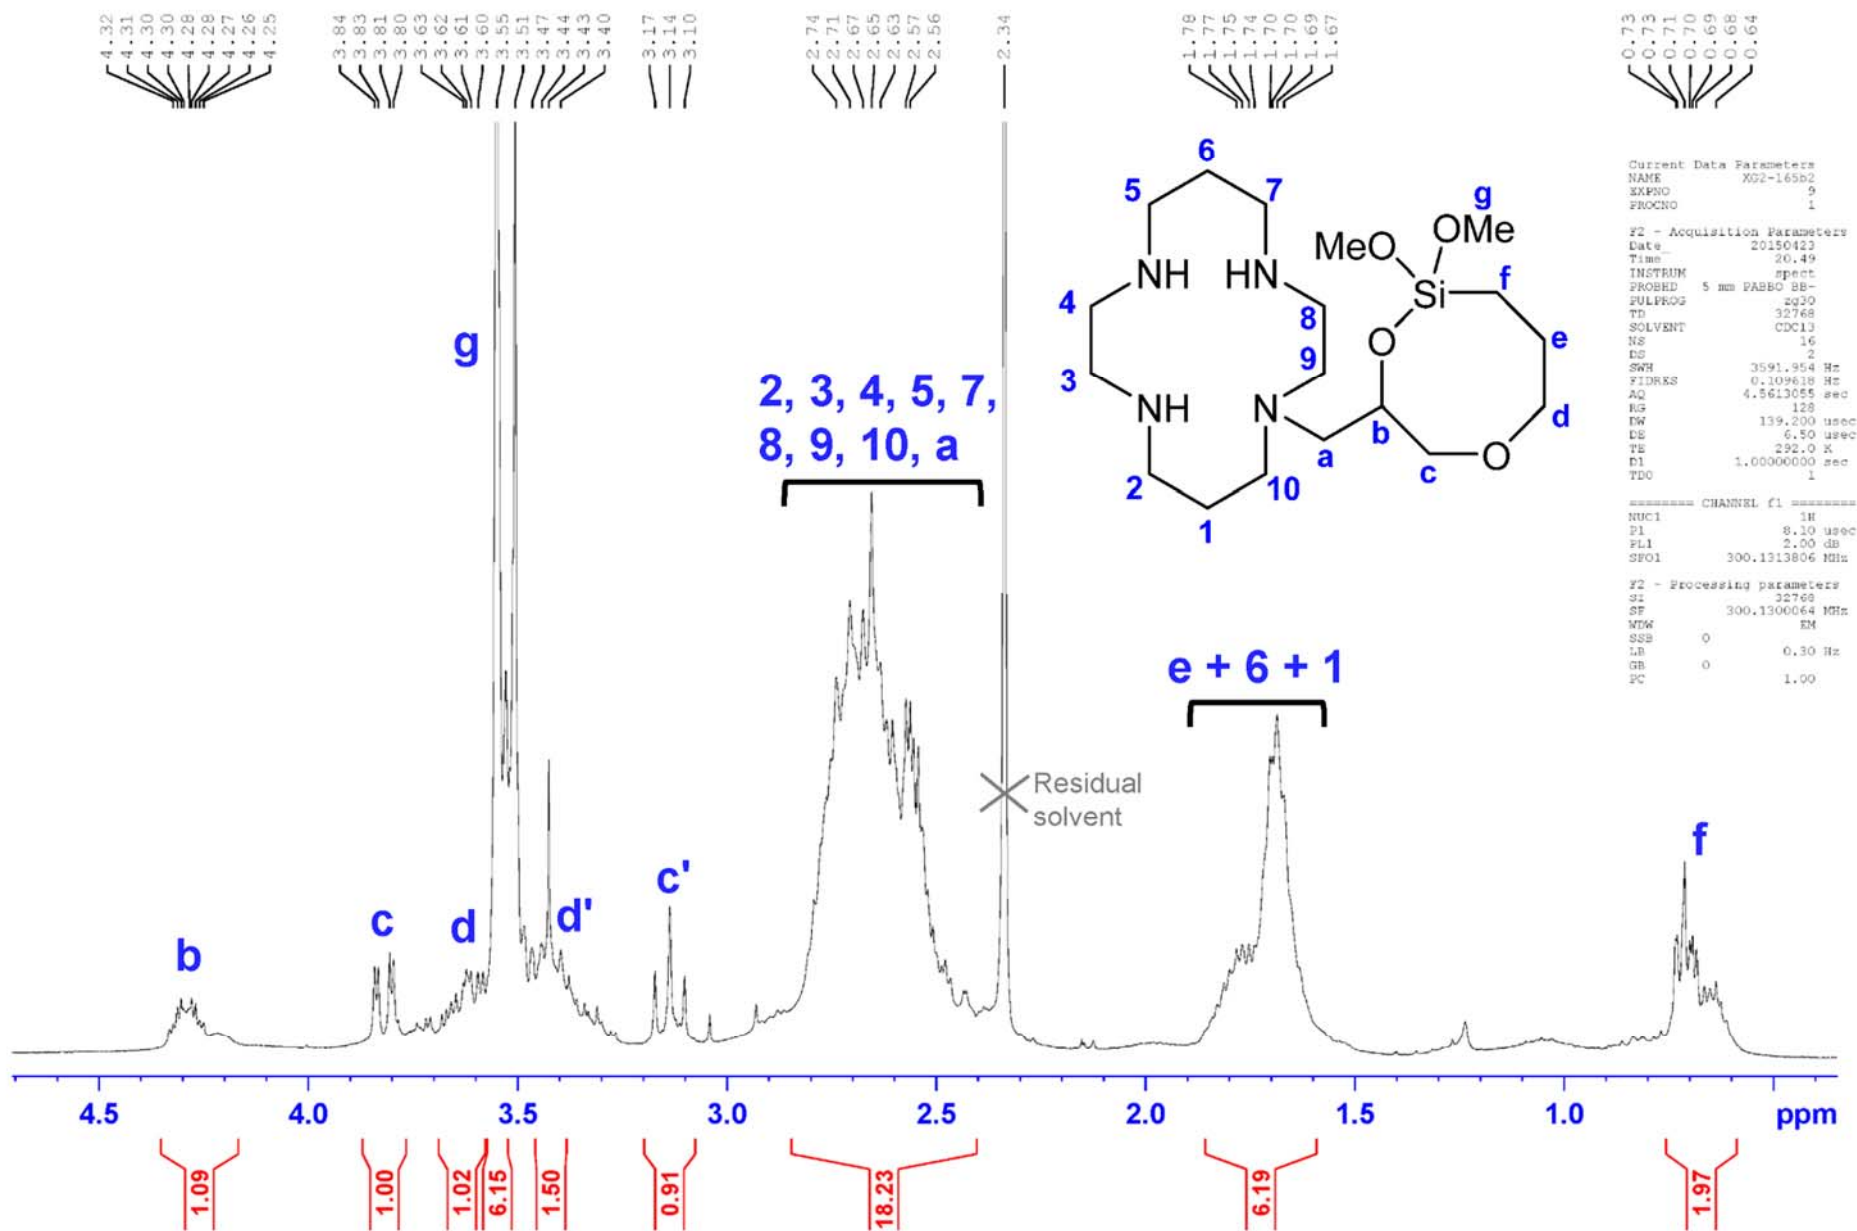

Figure SI\_153: <sup>1</sup>H NMR spectrum of compound 4

# SI\_154

## ZOOM HSQC Compound 4 (crude)

XG2-165-2b 14 1 D:\DATA\_RM\Xavier

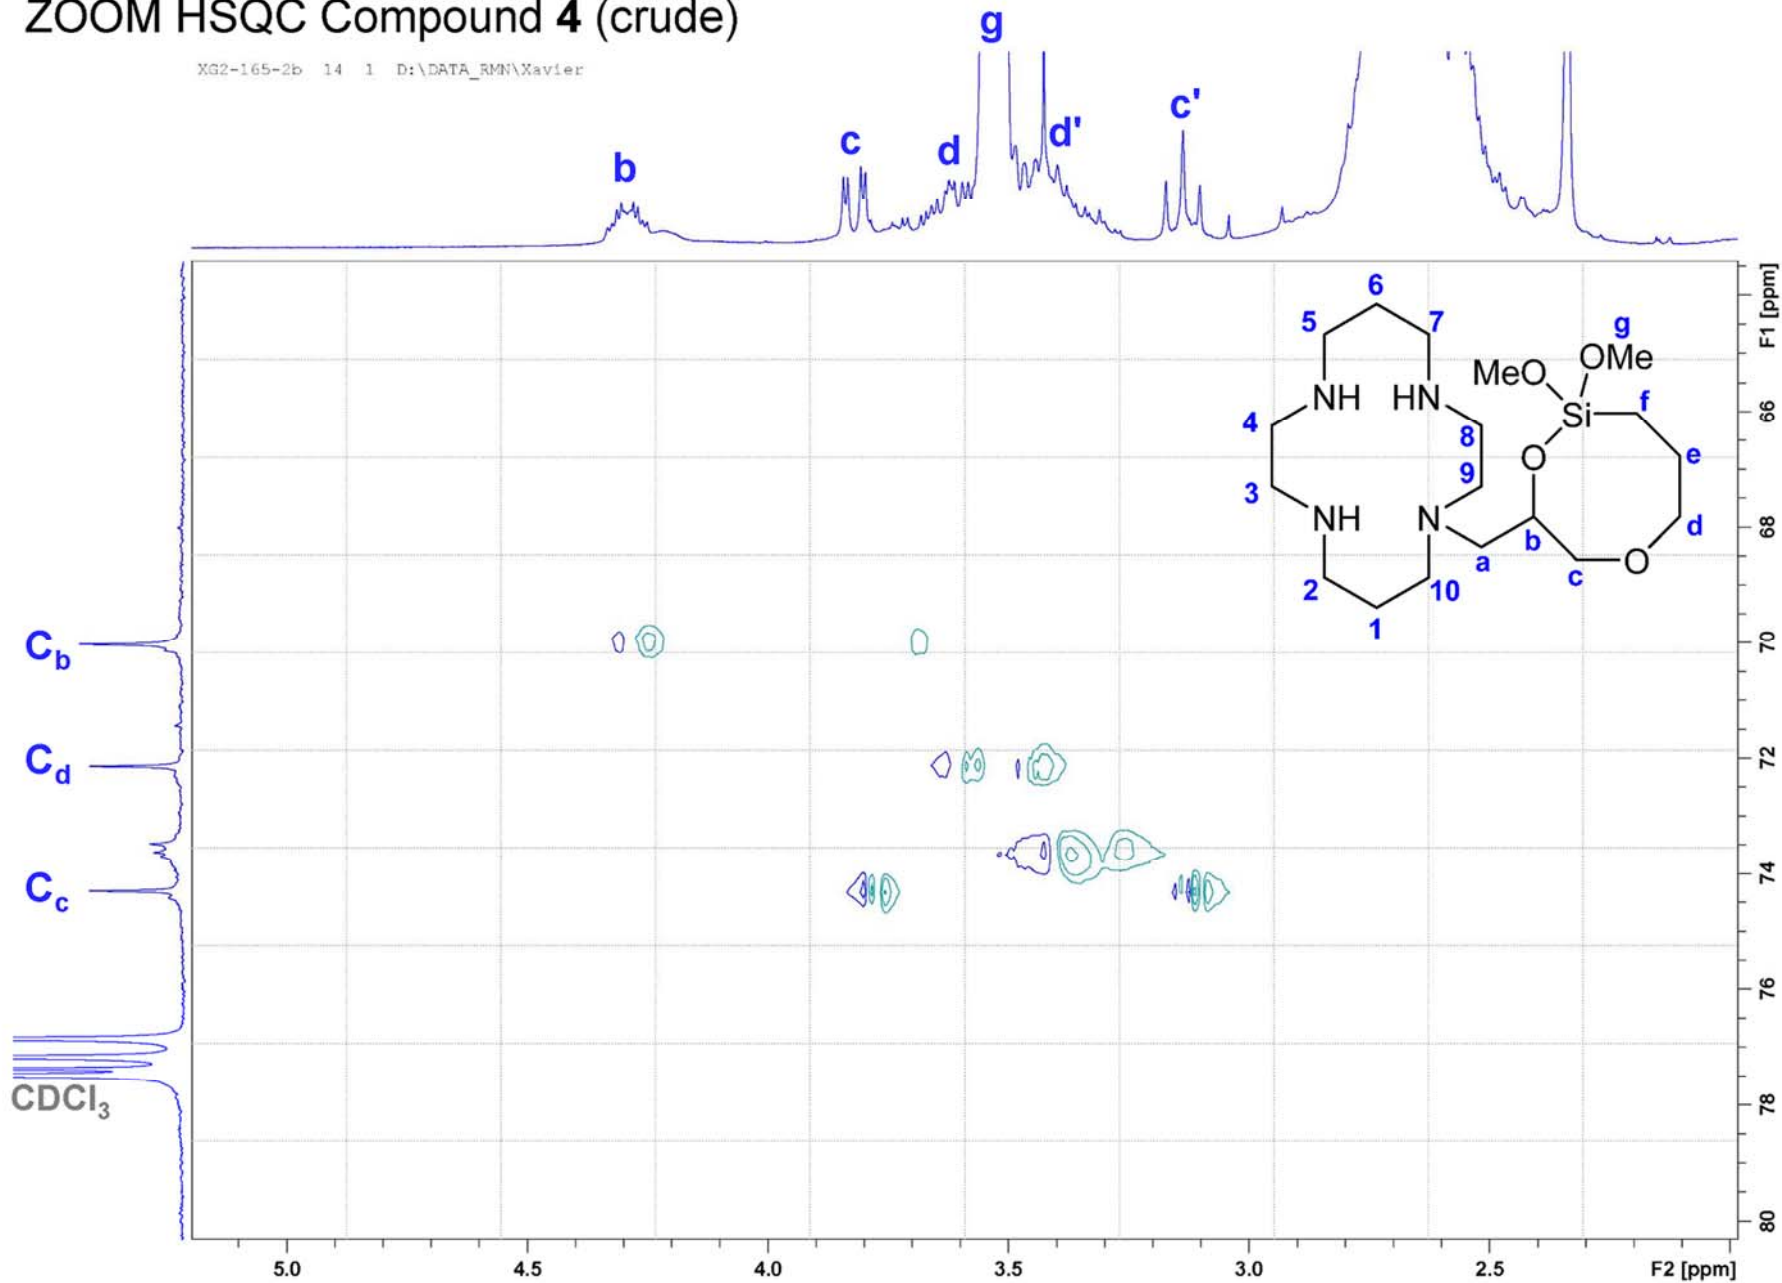

Figure SI\_154: HSQC (zoom 2-5 ppm for  $^1\text{H}$  spectrum; 64-80 ppm for  $^{13}\text{C}$  spectrum) of compound 4.

# SI\_155

XG2-148b CDCL3 1H

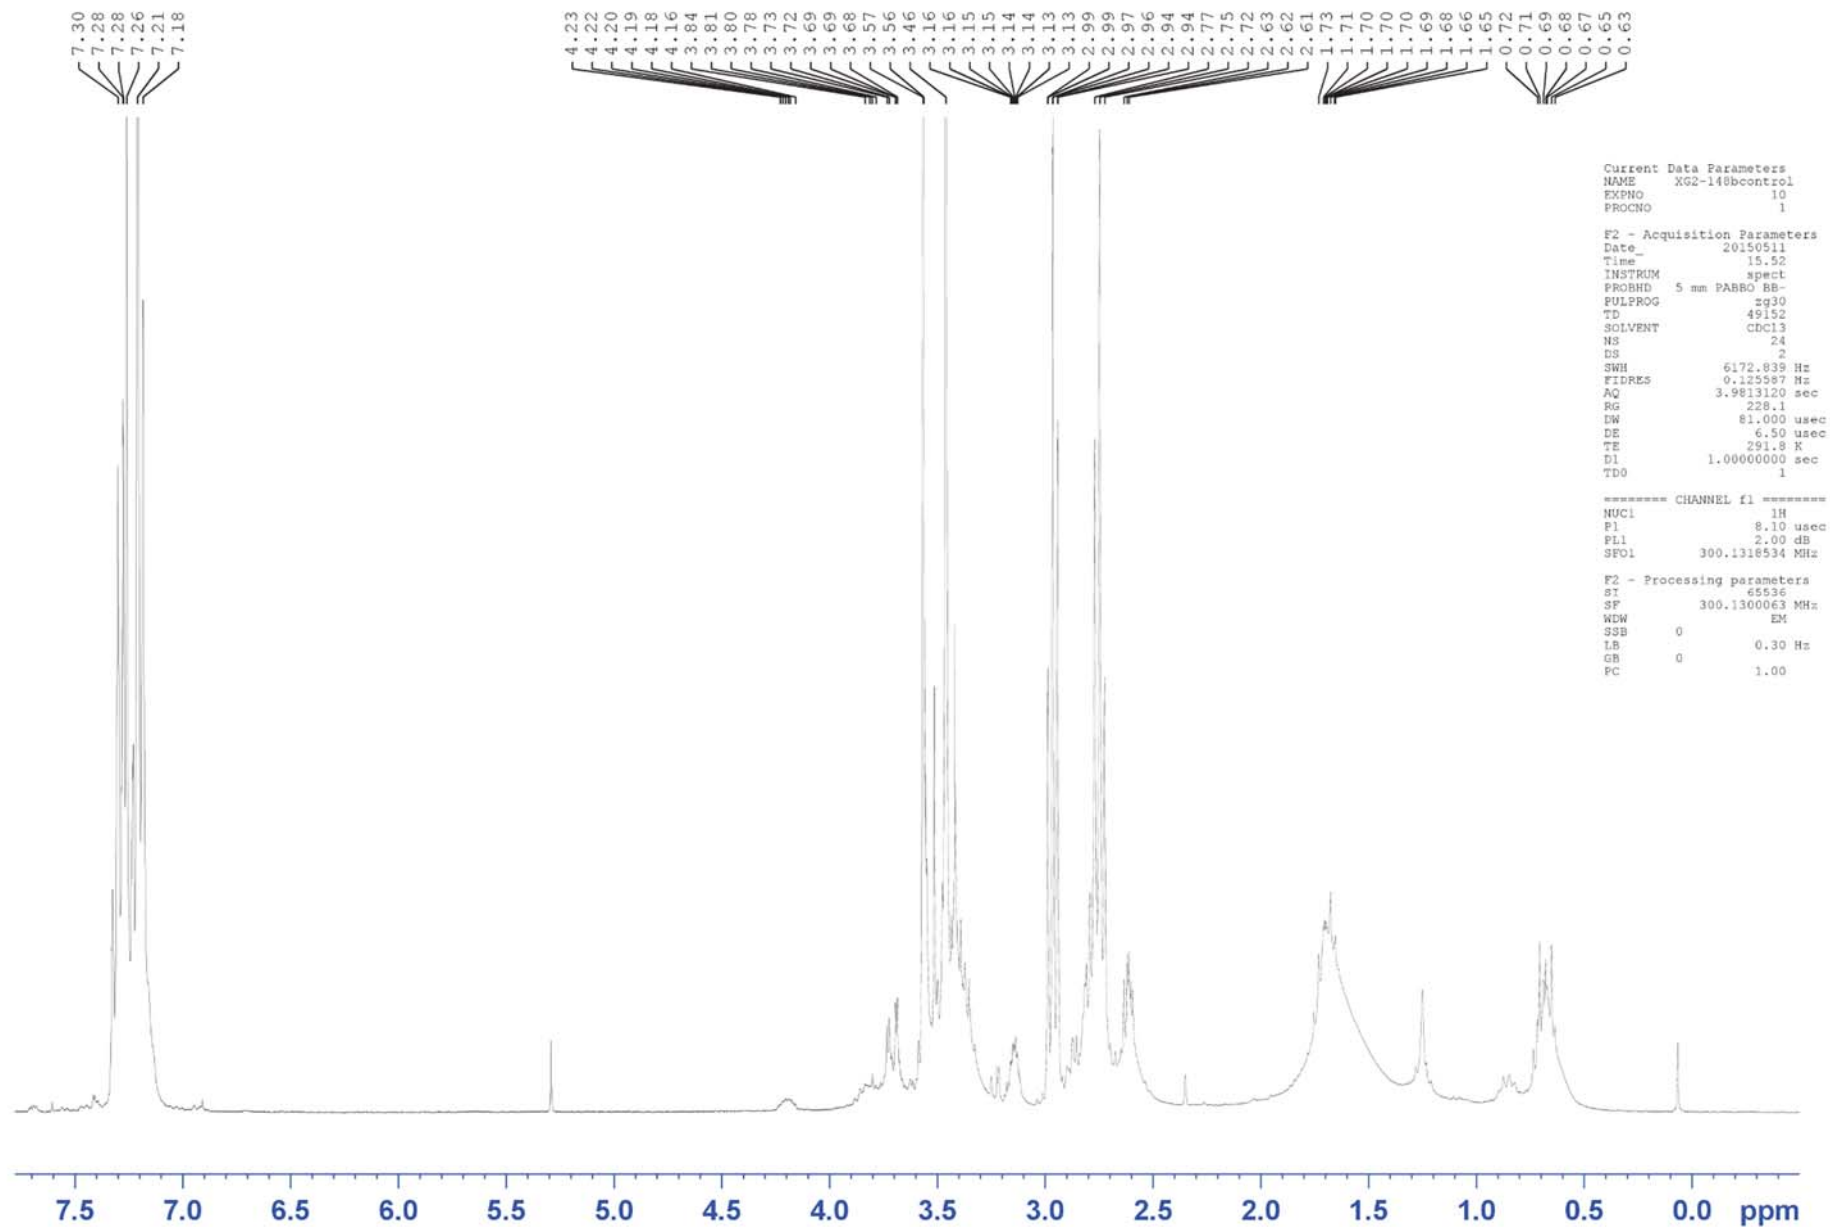

Figure SI\_155: <sup>1</sup>H NMR spectrum of the crude mixture of the reaction between phenethylamine and GPTMS in toluene (reflux, 3h).

# SI\_156

XG2-149b CDCl3 1H

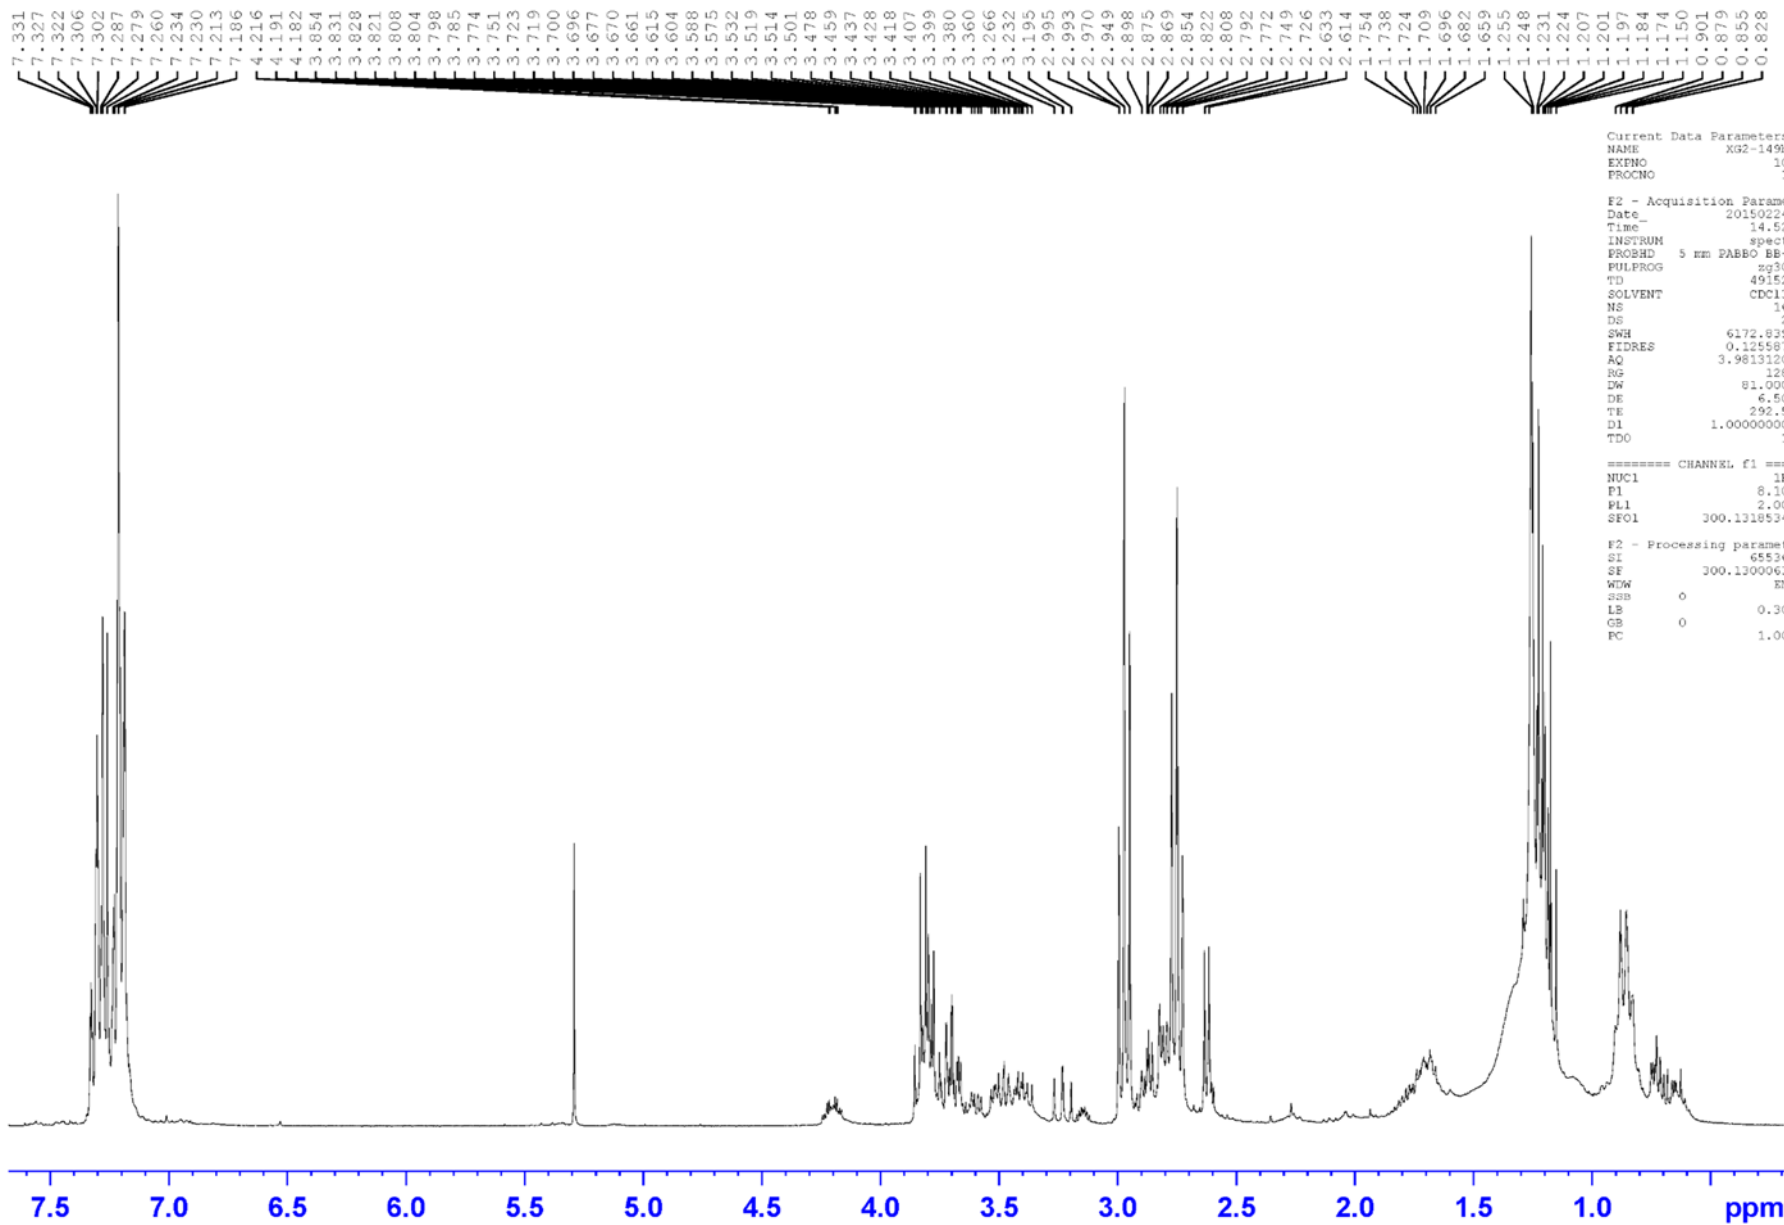

Figure SI\_156: <sup>1</sup>H NMR spectrum of the crude mixture of the reaction between phenethylamine and GPTES in toluene (reflux, 18h). (Scheme 4. in article)



# SI\_157

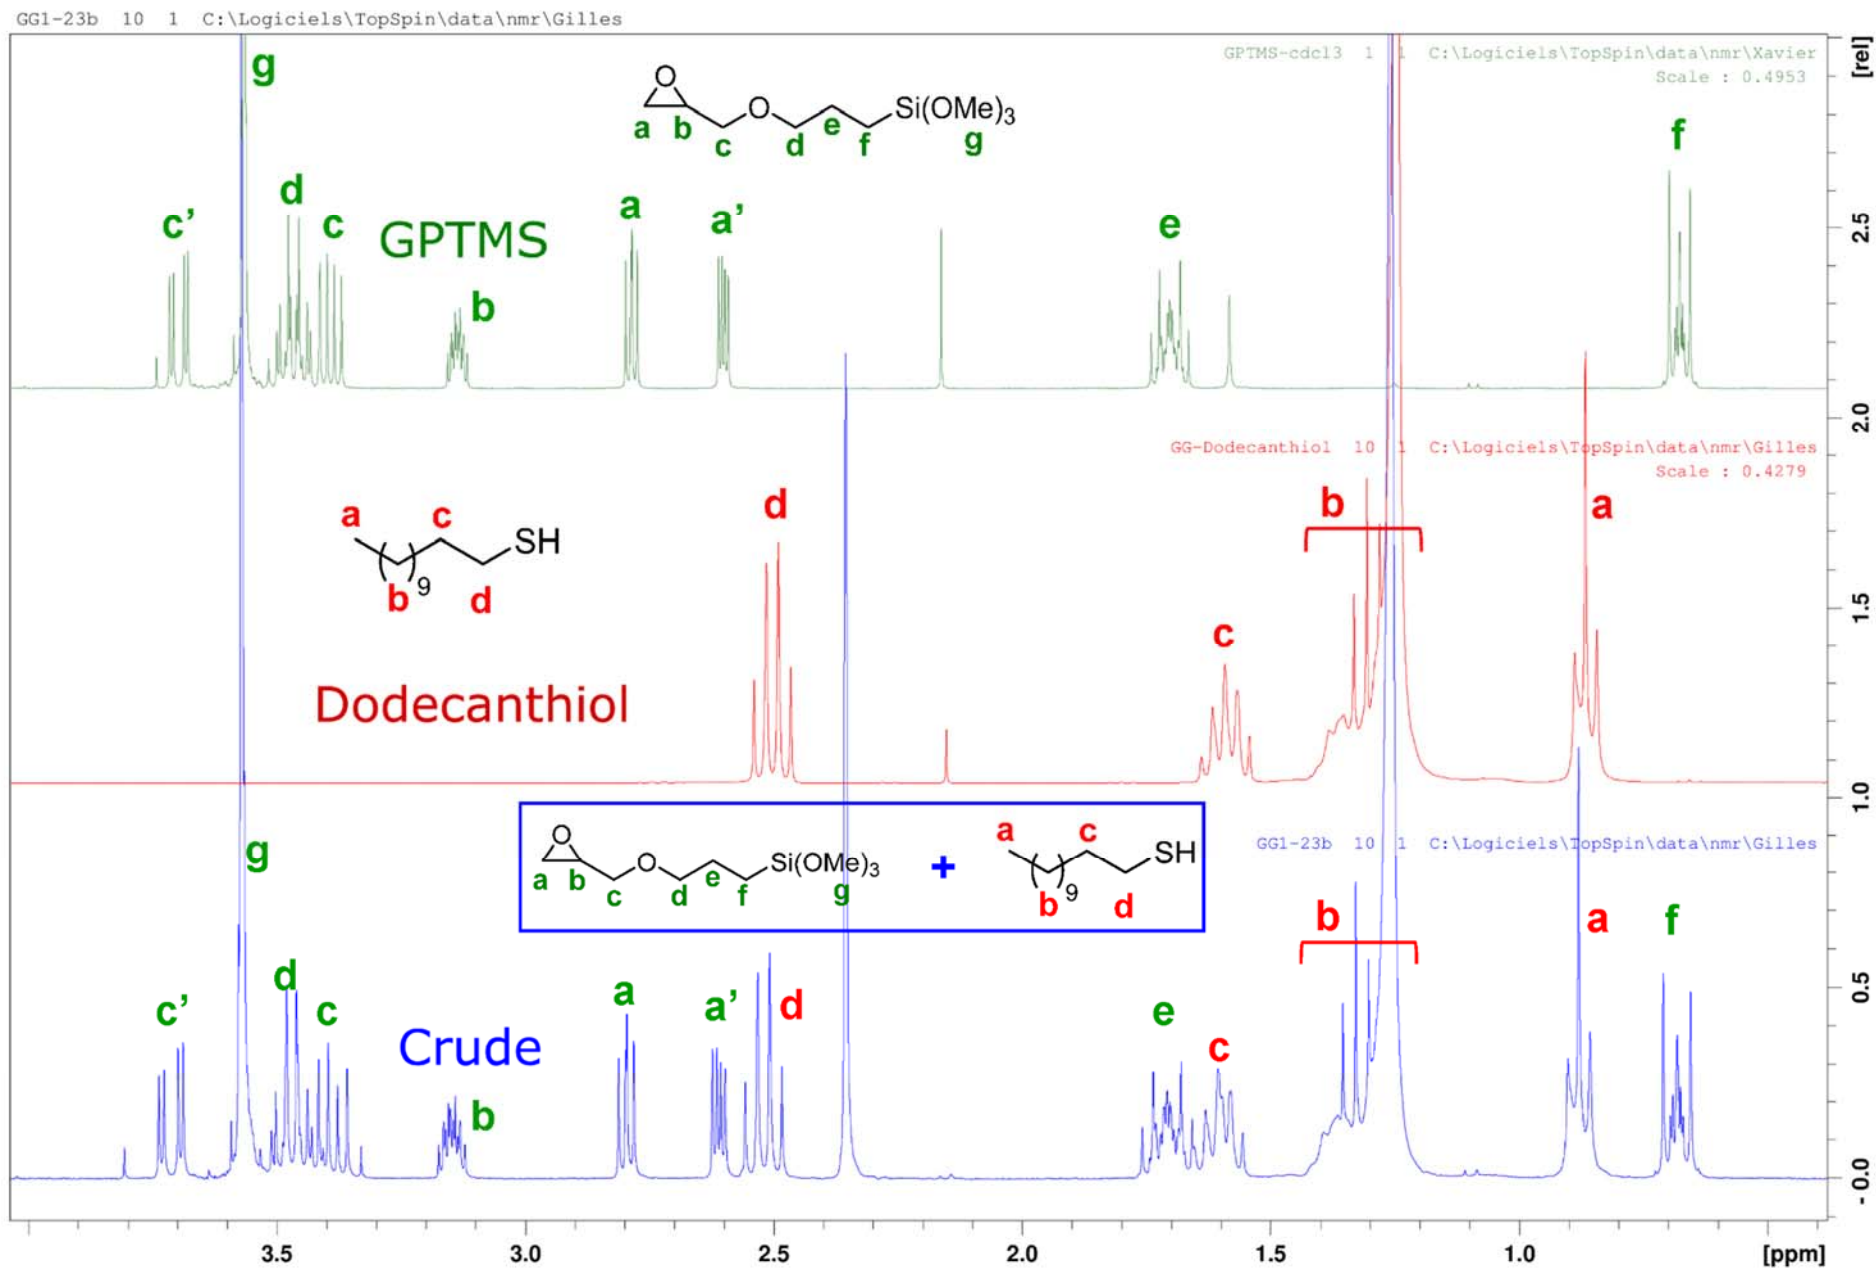

Figure SI\_157: Comparison of the  $^1\text{H}$  NMR spectra of both starting materials, GPTMS (green) and Dodecanthiol (red), with the crude oil (blue) obtained after 21h of reaction in toluene reflux. (Scheme 5. in article)

## SI\_158

XG2-143b 1H CDCl3

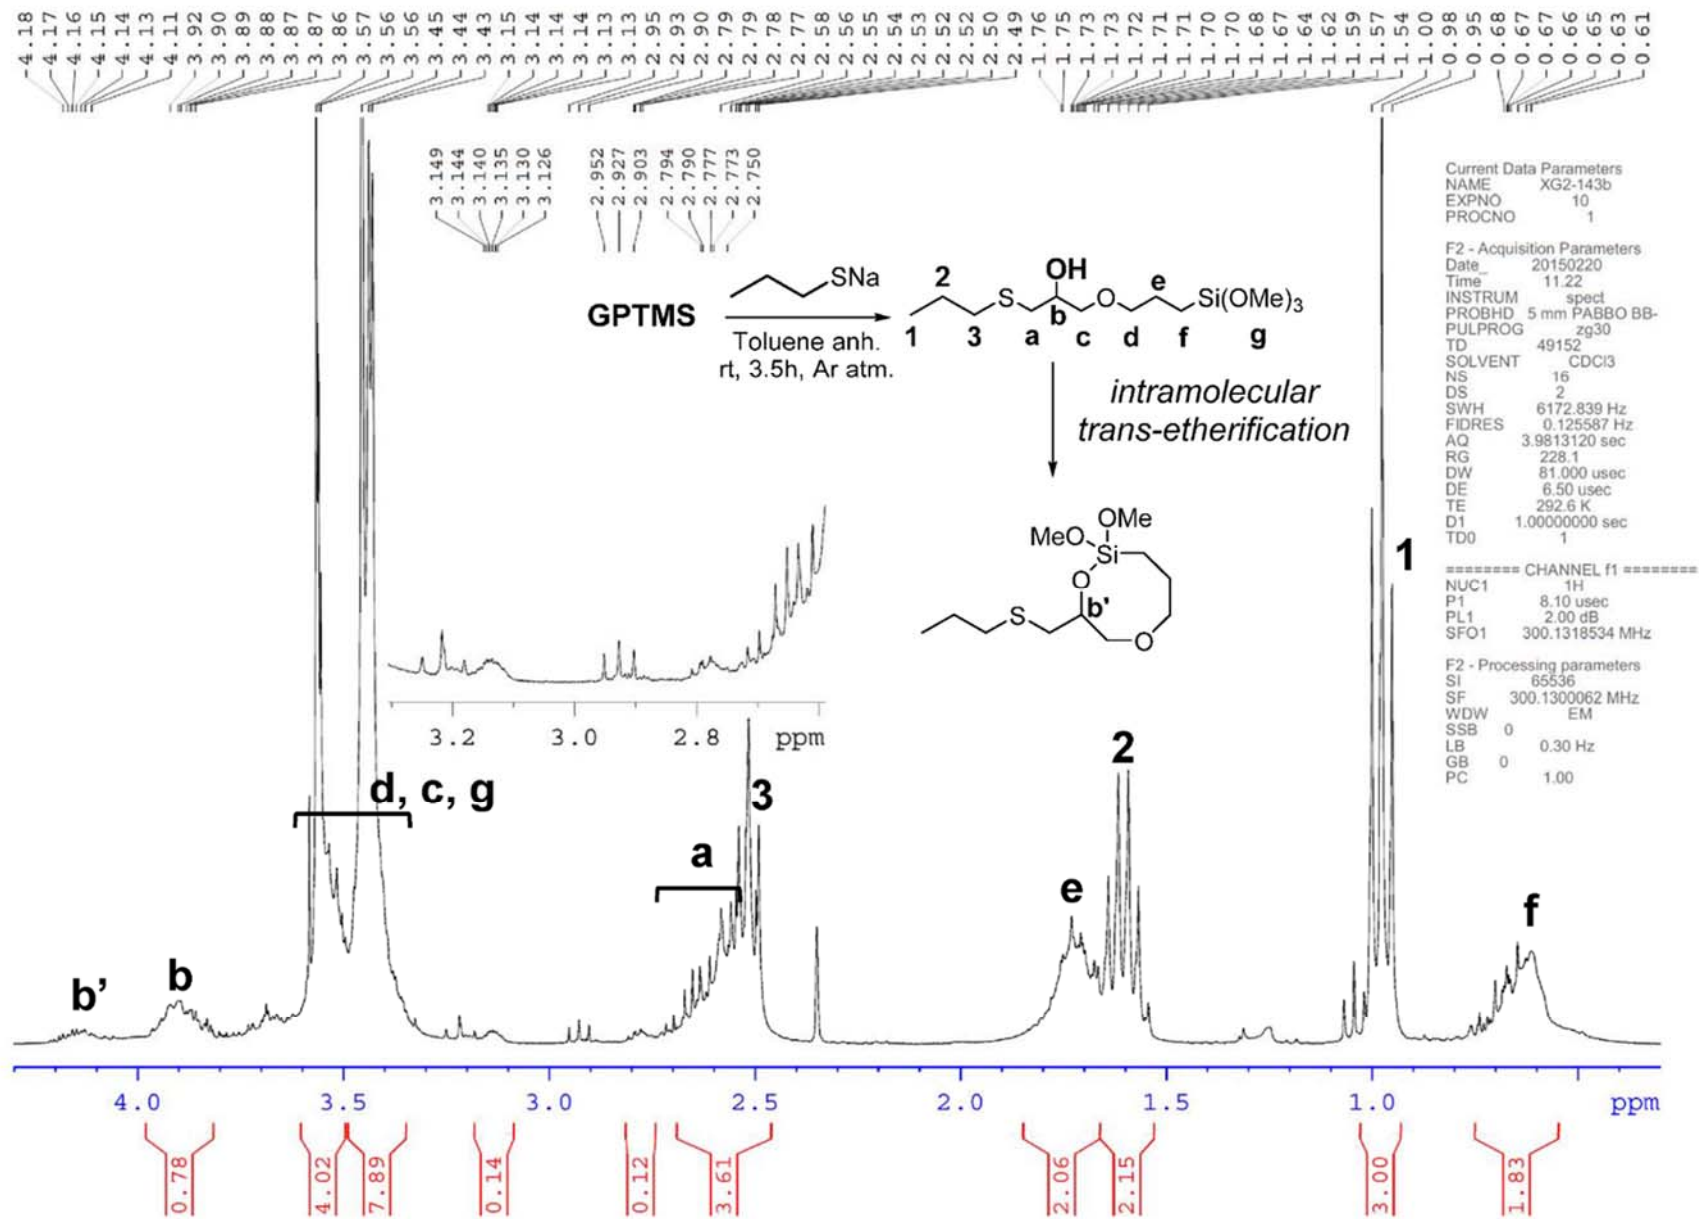Figure SI\_158:  $^1\text{H}$  NMR spectrum of the crude mixture of the reaction between sodium propylthiolate and GPTMS in toluene (rt, 3.5h). (Scheme 6. in article)

## SI\_159

XG2-145b 1H CDCl3

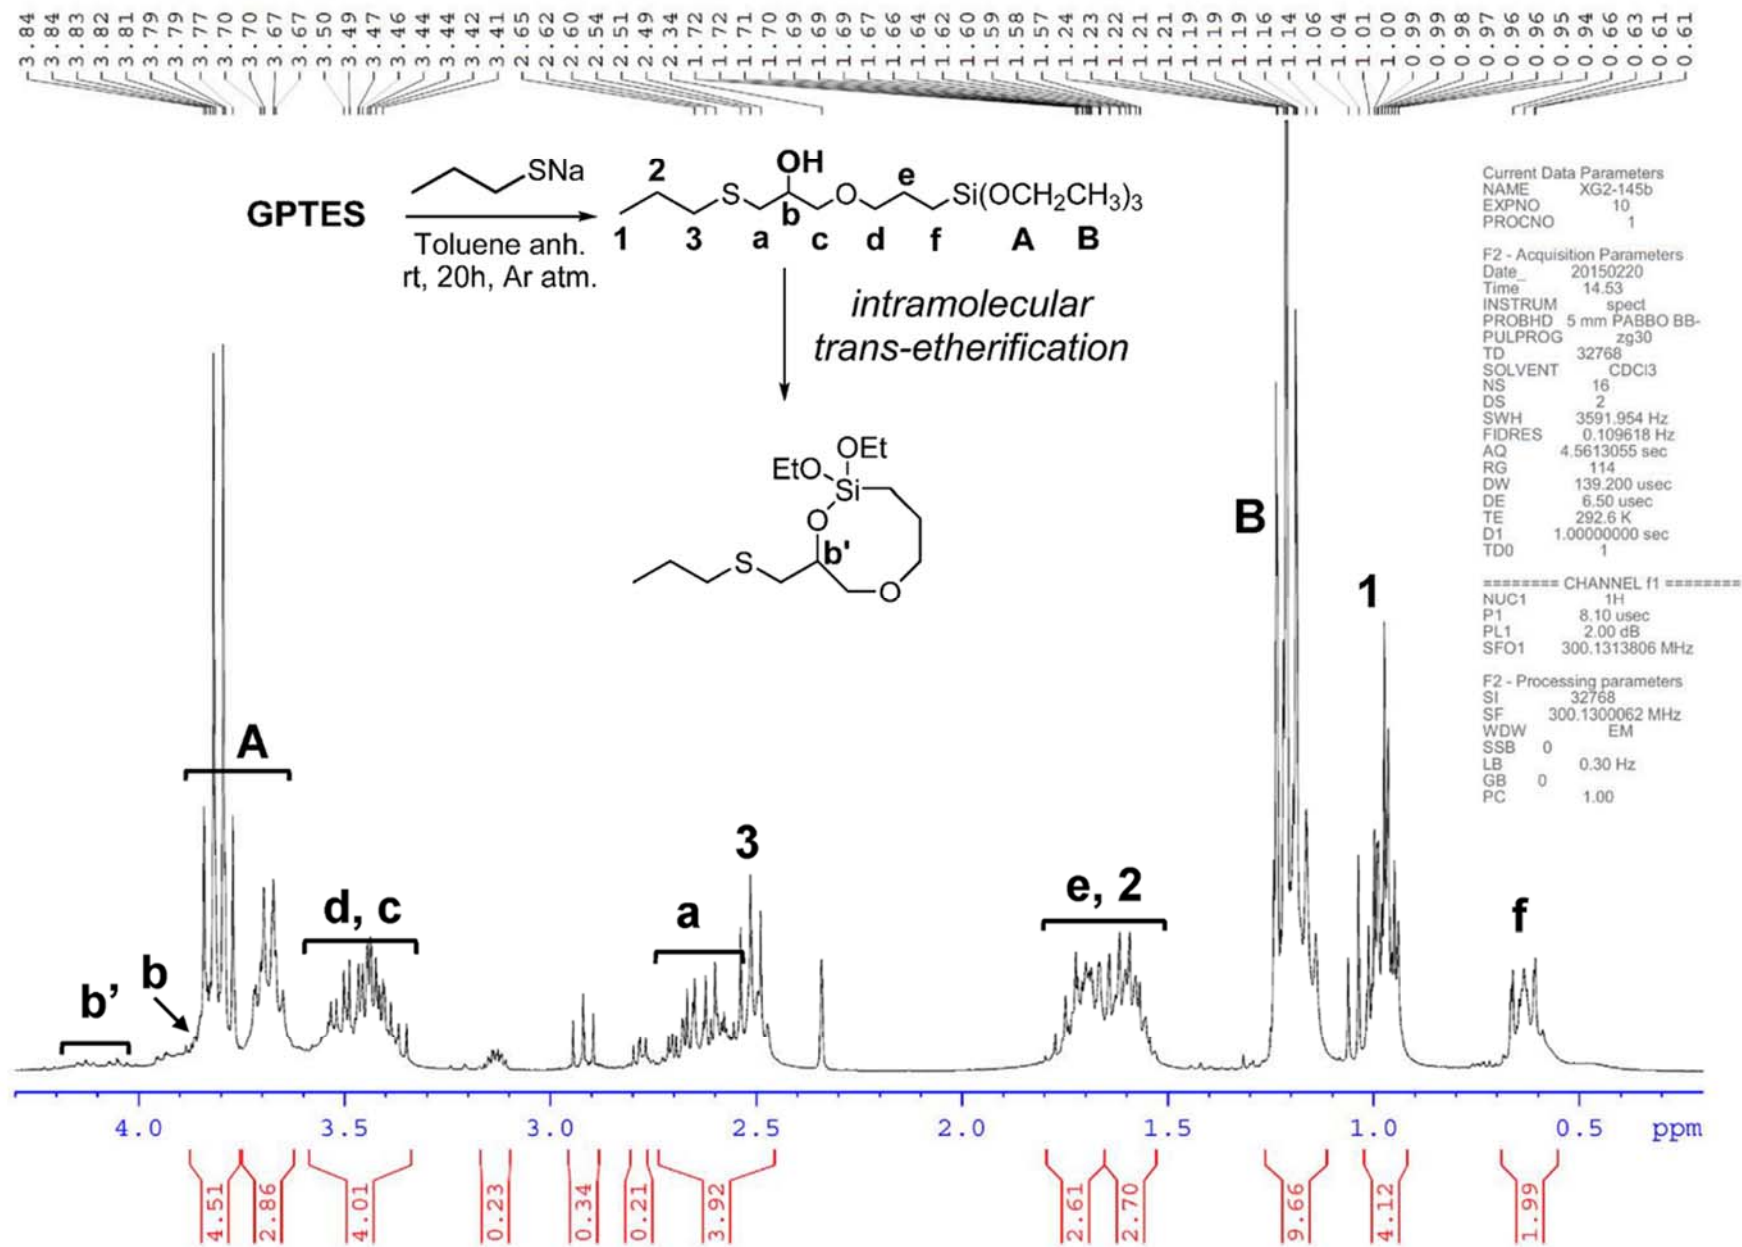Figure SI\_159:  $^1\text{H}$  NMR spectrum of the crude mixture of the reaction between sodium propylthiolate and GPTES in toluene (rt, 20h). (Scheme 6. in article)

# SI\_160

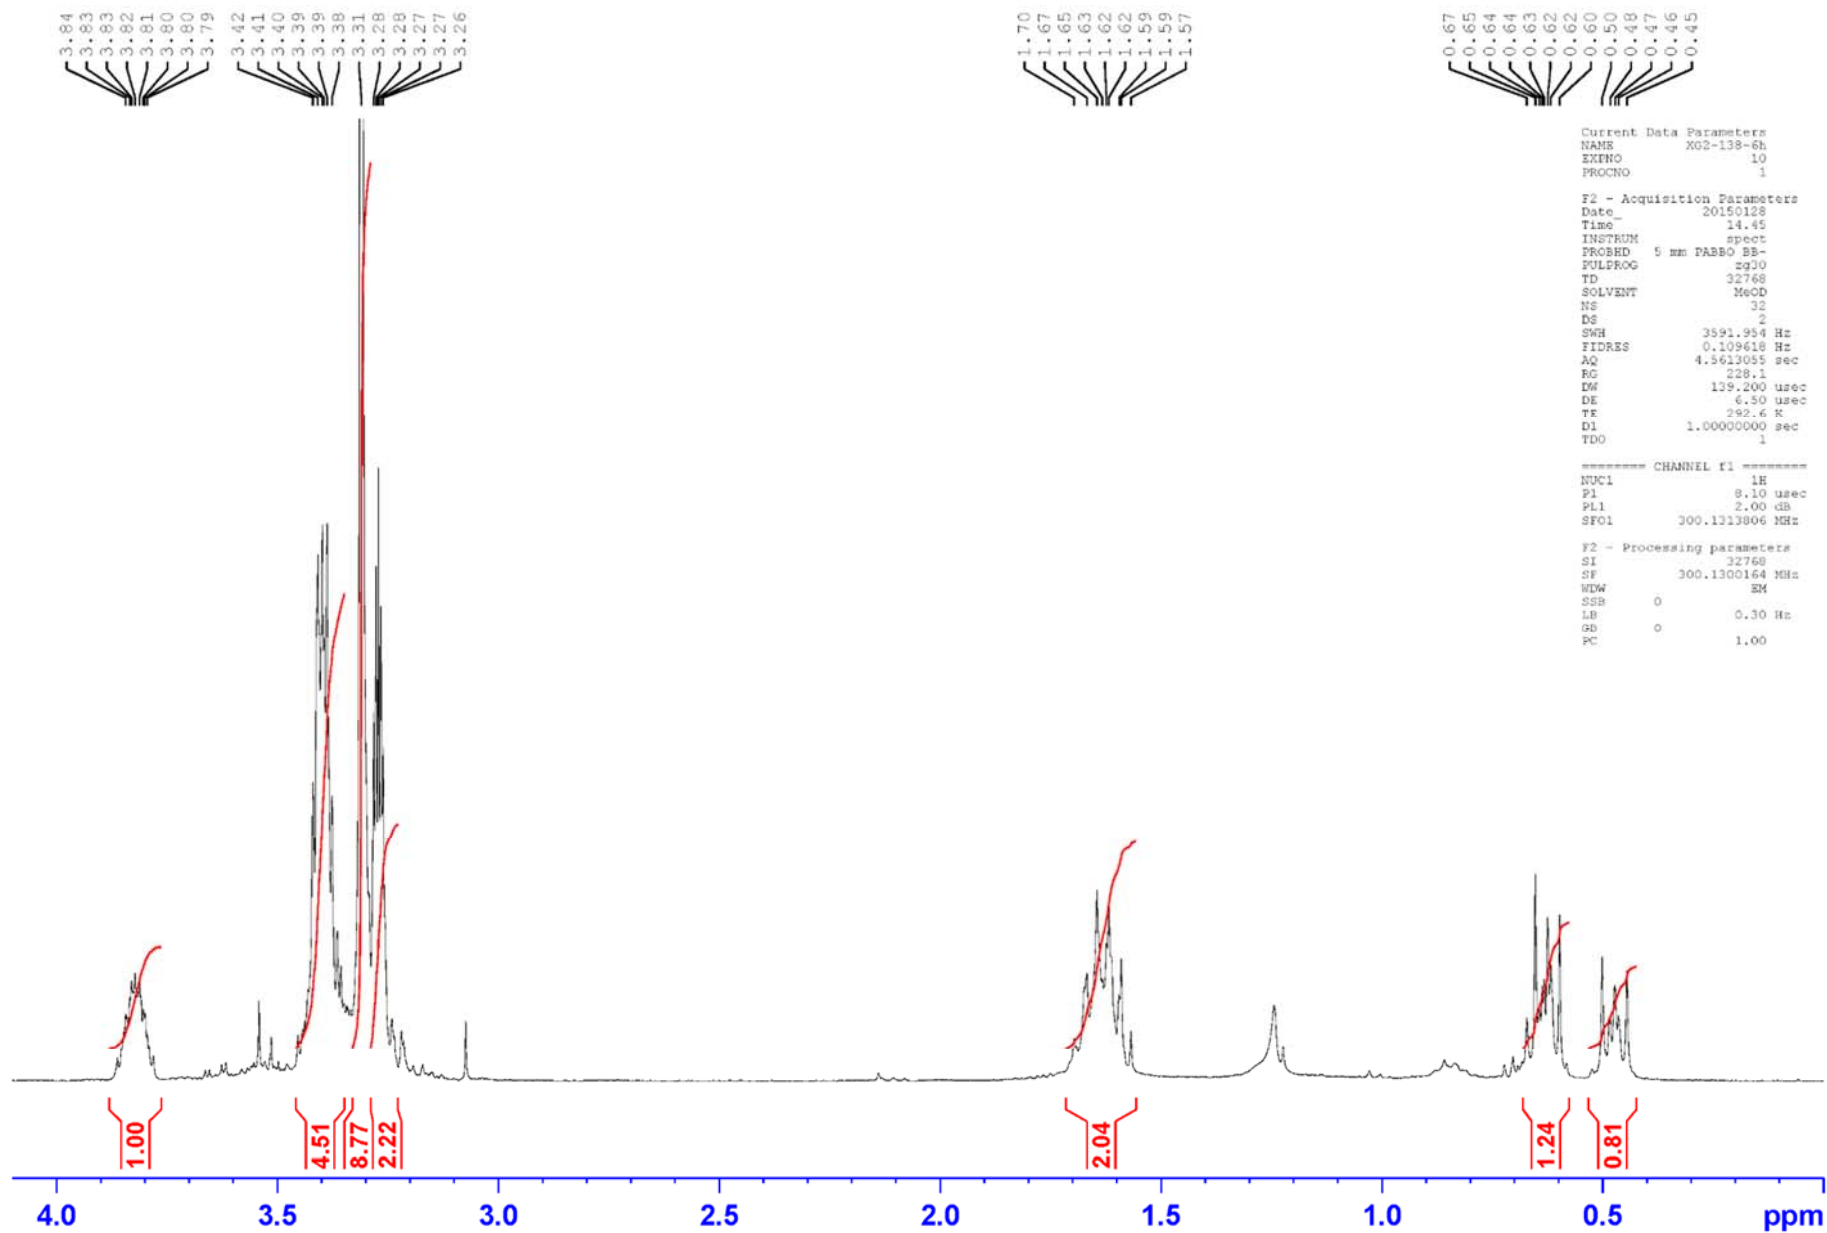

Figure SI\_160: <sup>1</sup>H NMR spectrum of the reaction mixture after 5h of reaction between NaN<sub>3</sub> (excess) and GPTMS in CD<sub>3</sub>OD .

# SI\_161

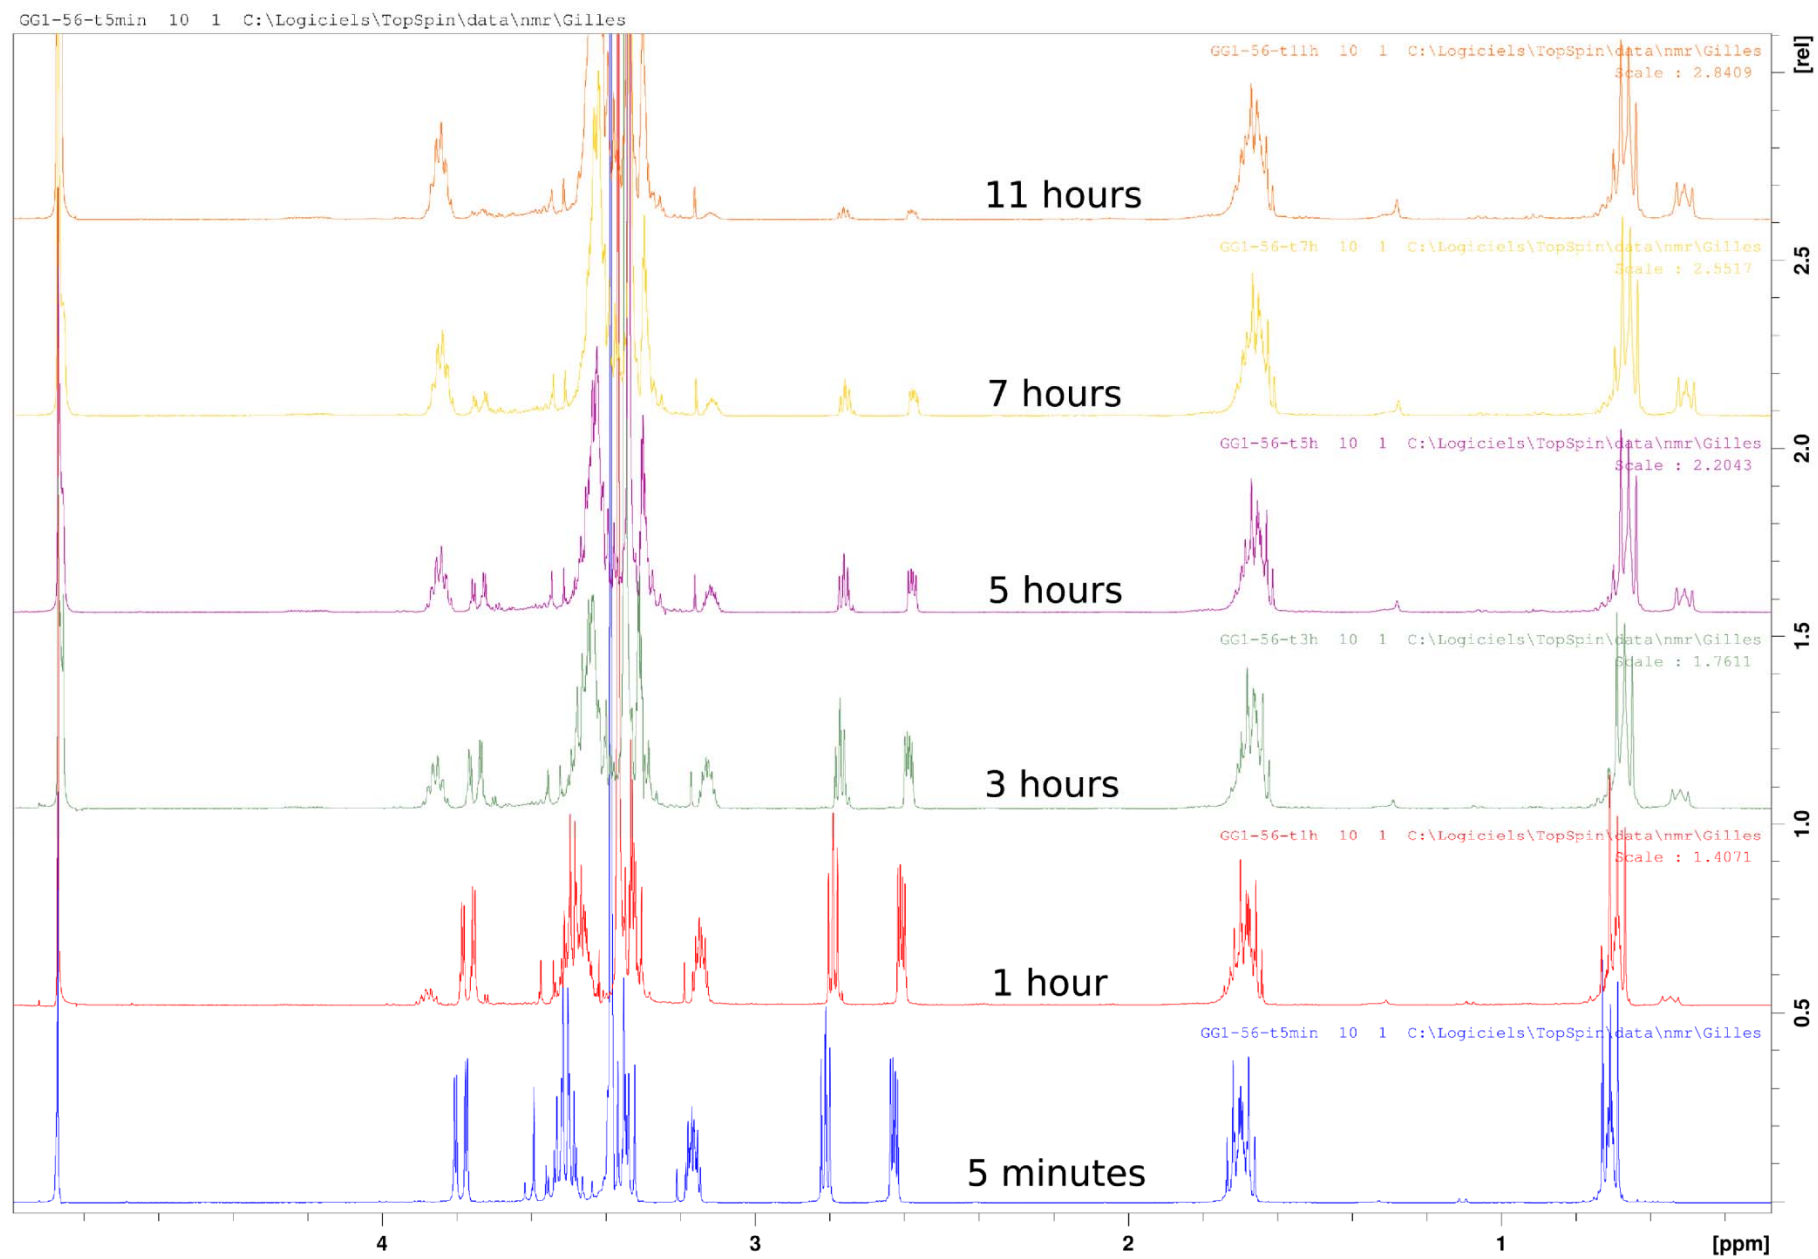

Figure SI\_161: <sup>1</sup>H NMR monitoring of the reaction between NaN<sub>3</sub> and GTPMS in stoichiometric conditions (CD<sub>3</sub>OD, 70°C).

# SI\_162

sonde CRYO DUAL 1H/13C  
spectre RMN-13C avec decouplage 1H  
sw = 236ppm avec angle de 30 degre

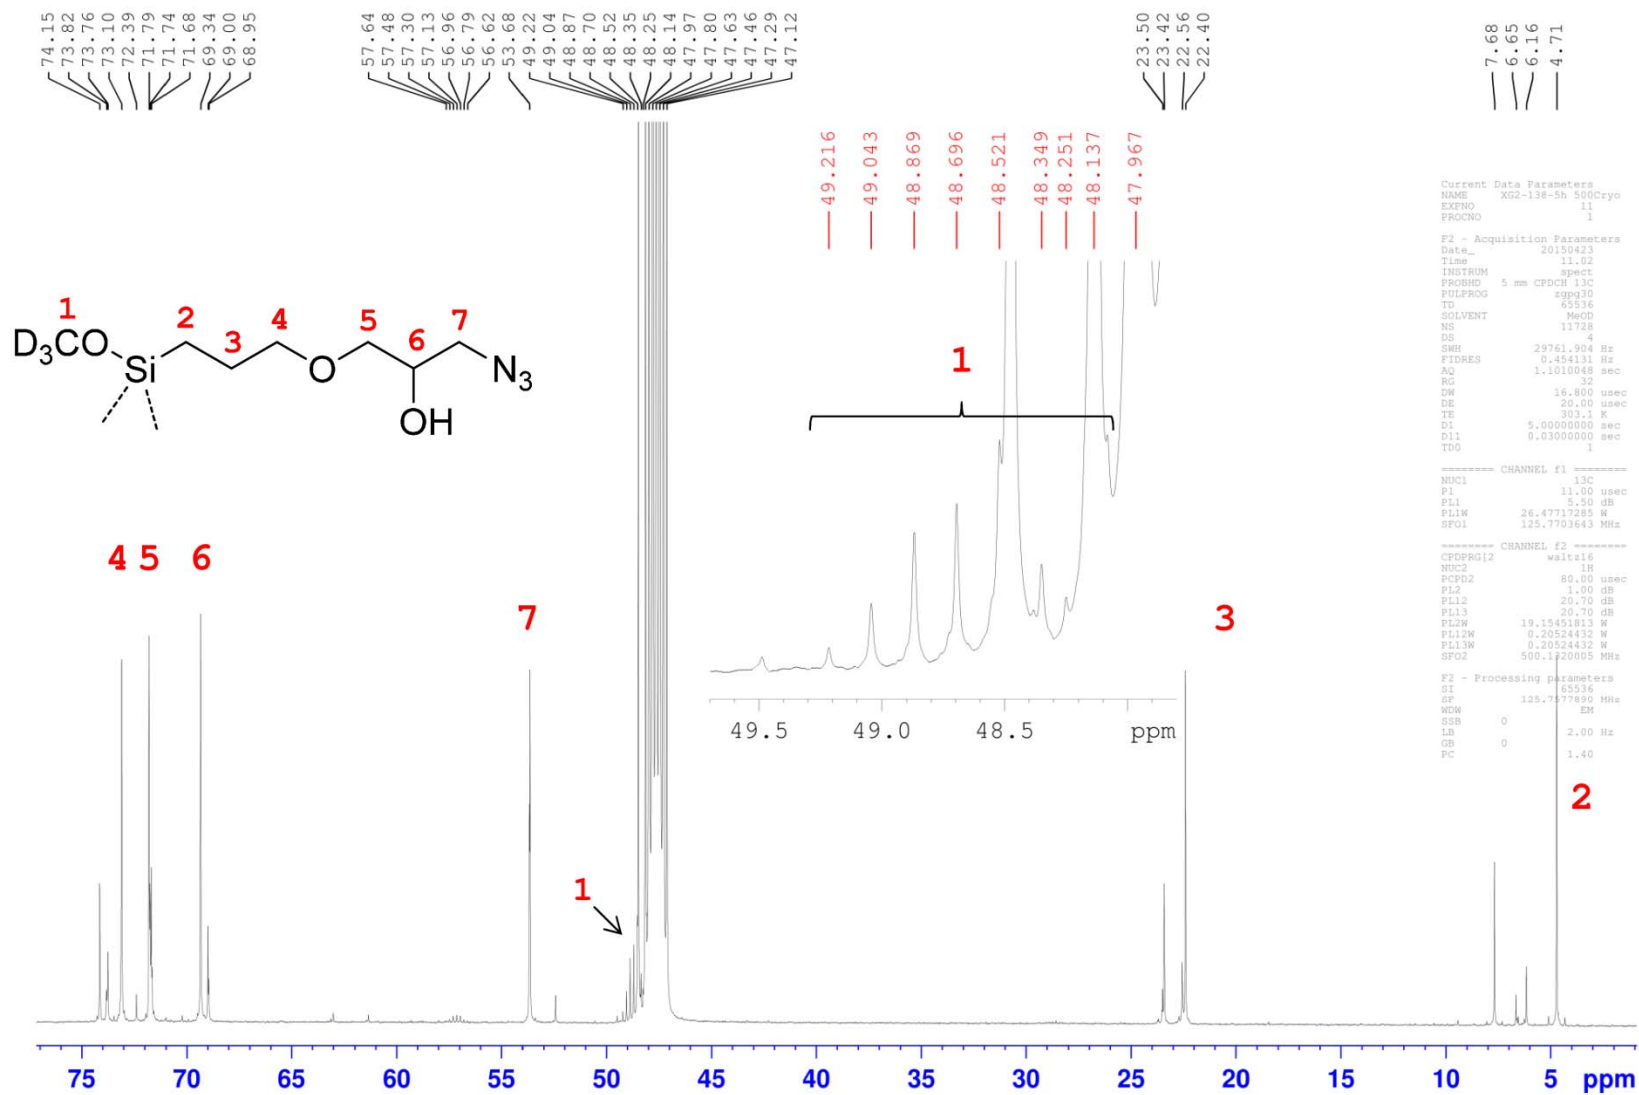

Figure SI\_162: <sup>13</sup>C NMR spectrum of the crude mixture after 5h of reaction between NaN<sub>3</sub> and GPTMS in refluxing deuterated methanol. (Scheme 7 (a.) in article)

# SI\_163

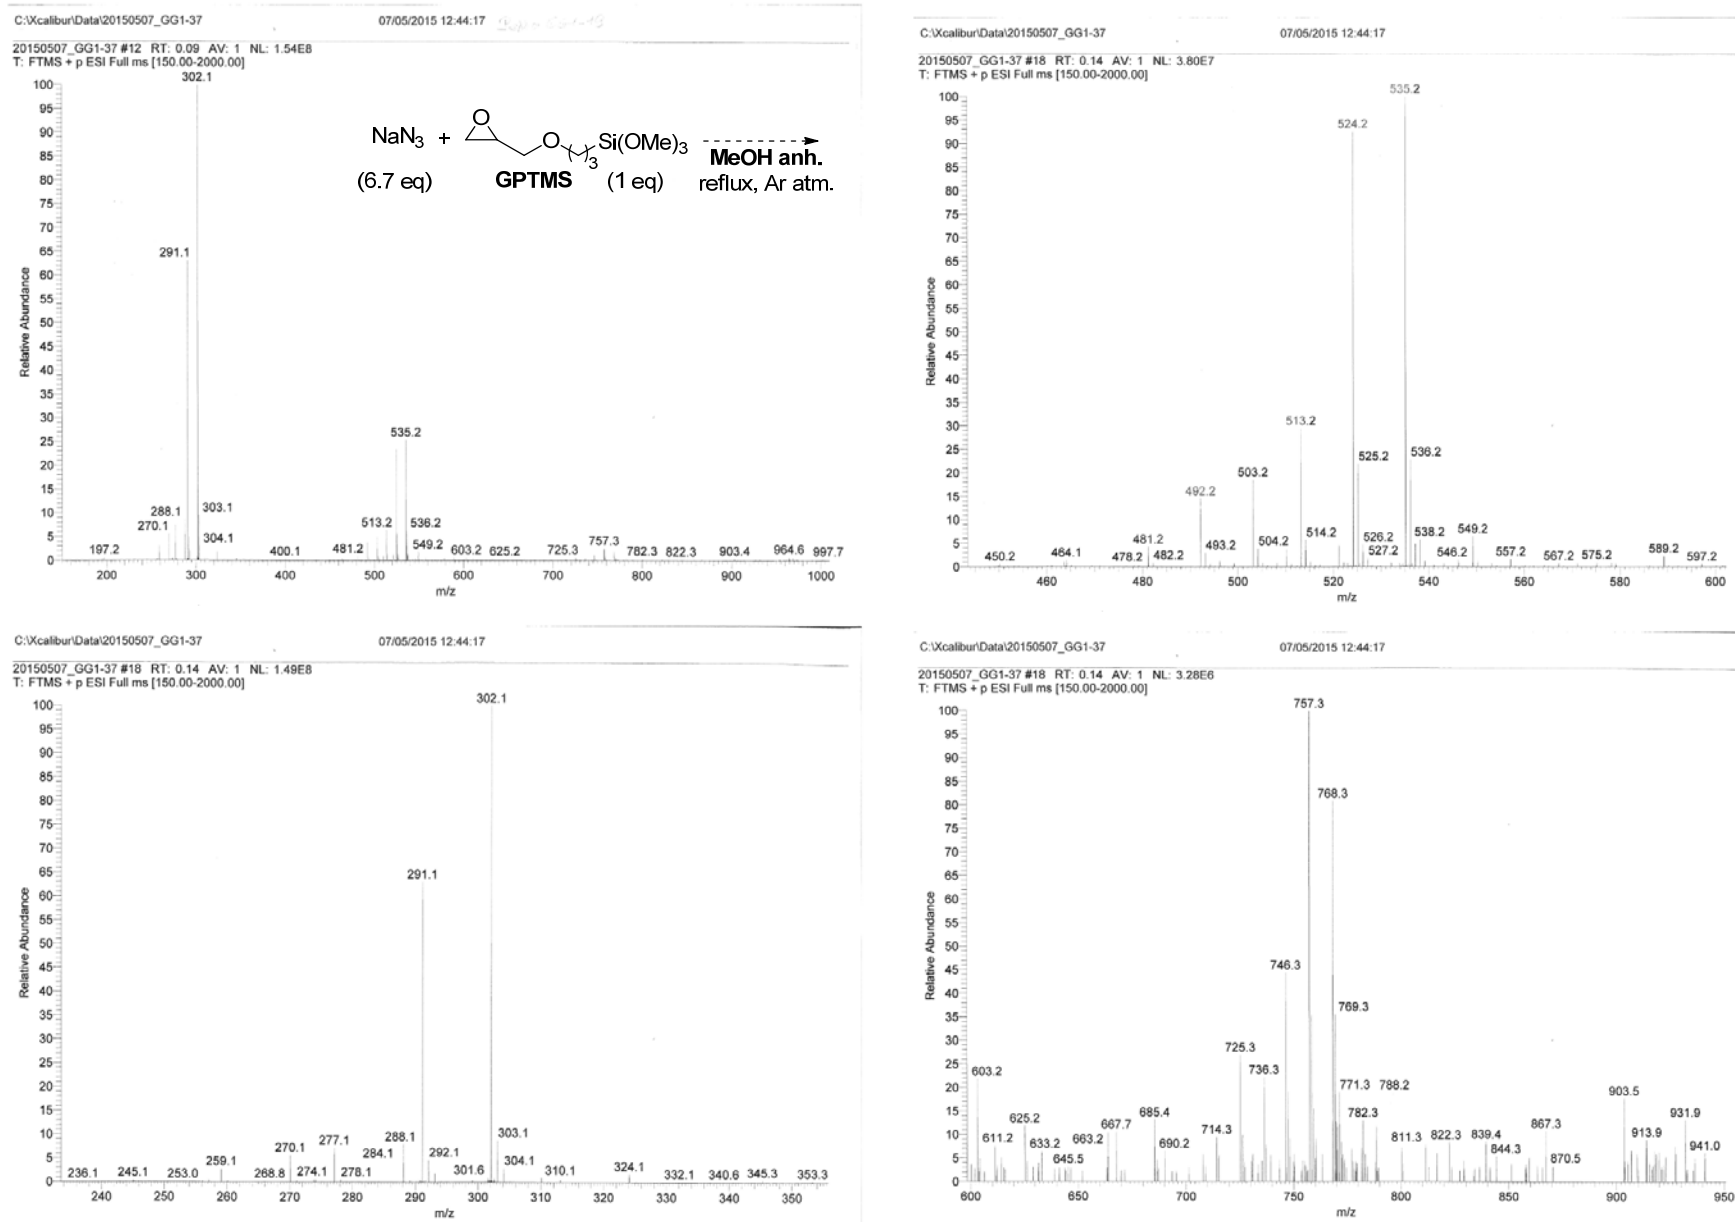

Figure SI\_163: Complementary MS-ESI spectra (with zoom) of the crude mixture after 5h of reaction between NaN<sub>3</sub> and GPTMS in refluxing methanol. (Figure 6. in article)



# SI\_164

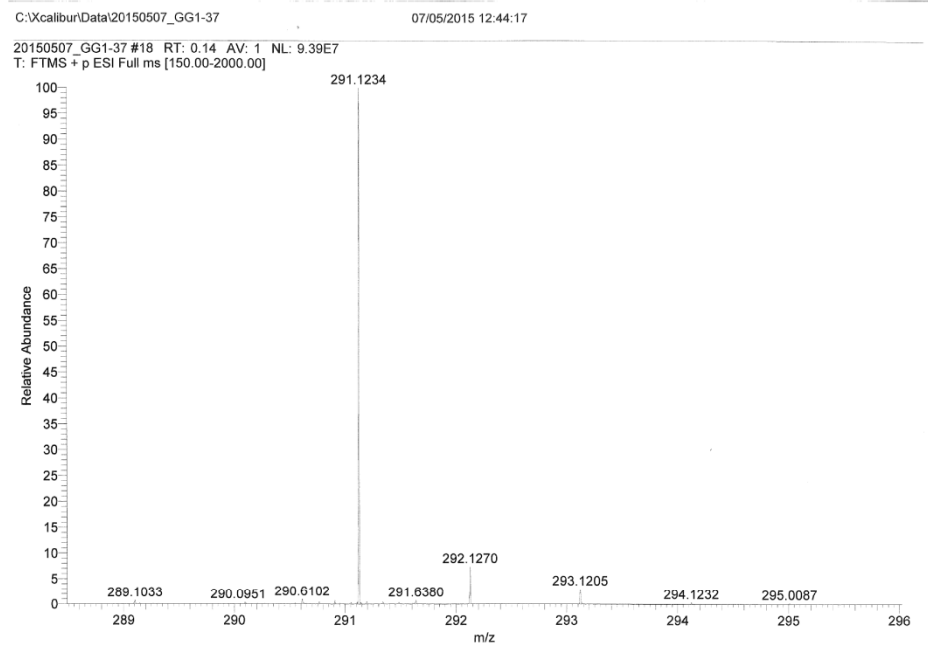

Elemental composition search on mass 291.12

| m/z      | Theo. Mass | Delta (ppm) | RDB equiv. | Composition                                                       |
|----------|------------|-------------|------------|-------------------------------------------------------------------|
| 291.1234 | 291.1232   | 0.97        | 3.5        | C <sub>8</sub> H <sub>19</sub> O <sub>4</sub> N <sub>6</sub> Si ✓ |
|          | 291.1240   | -2.16       | 12.5       | C <sub>17</sub> H <sub>15</sub> O <sub>4</sub> N <sub>4</sub>     |
|          | 291.1227   | 2.44        | 7.5        | C <sub>16</sub> H <sub>19</sub> O <sub>5</sub>                    |
|          | 291.1245   | -3.72       | 8.5        | C <sub>9</sub> H <sub>15</sub> N <sub>10</sub> Si                 |

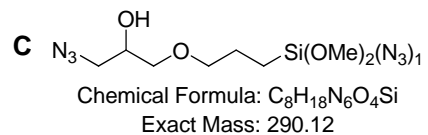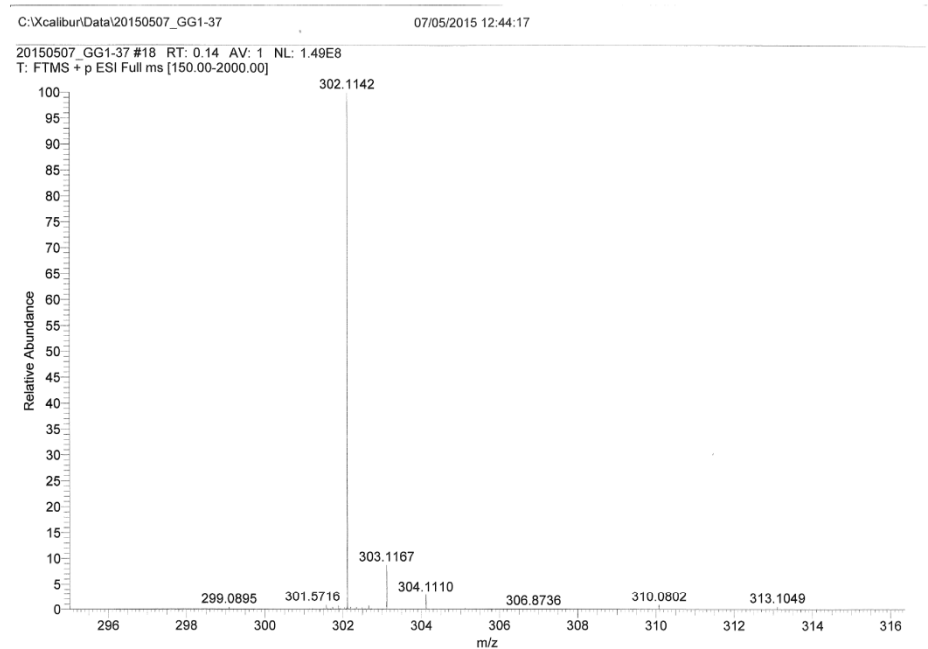

Elemental composition search on mass 302.11

| m/z      | Theo. Mass | Delta (ppm) | RDB equiv. | Composition                                                       |
|----------|------------|-------------|------------|-------------------------------------------------------------------|
| 302.1142 | 302.1140   | 0.60        | 5.5        | C <sub>7</sub> H <sub>16</sub> O <sub>3</sub> N <sub>9</sub> Si ✓ |
|          | 302.1135   | 2.11        | 9.5        | C <sub>15</sub> H <sub>16</sub> O <sub>4</sub> N <sub>3</sub>     |
|          | 302.1149   | -2.32       | 14.5       | C <sub>16</sub> H <sub>12</sub> N <sub>7</sub>                    |

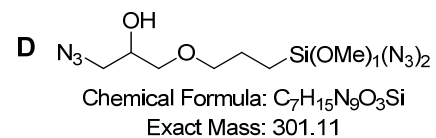

Figure SI\_164: HRMS-ESI spectra of the molecular peaks ( $[M+H]^+$ ) of compounds C (left) & D (right).



# SI\_165

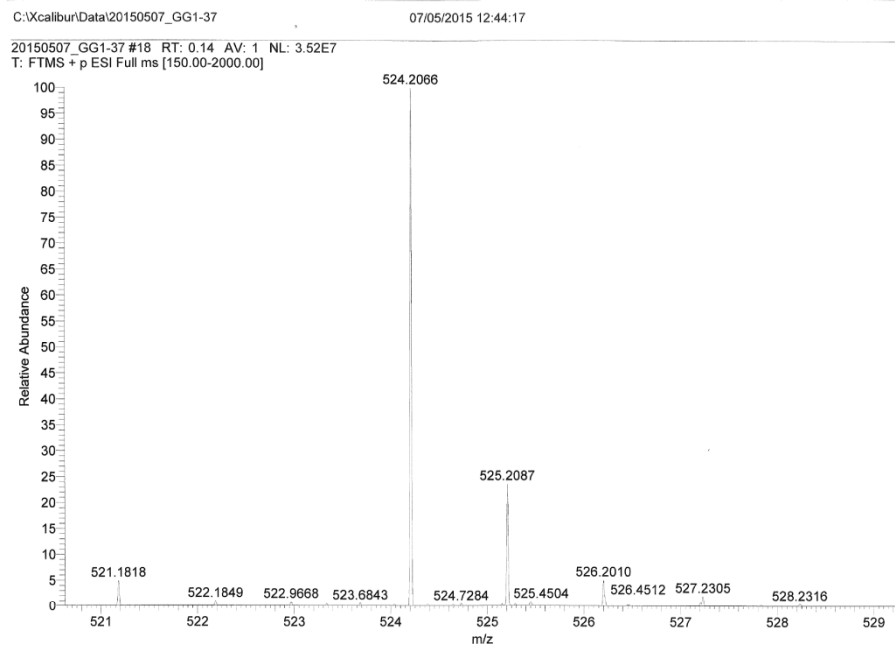

Elemental composition search on mass 524.21

| m/z      | Theo. Mass | Delta (ppm) | RDB equiv. | Composition                                                                      |
|----------|------------|-------------|------------|----------------------------------------------------------------------------------|
| 524.2066 | 524.2066   | -0.03       | 7.0        | C <sub>16</sub> H <sub>33</sub> O <sub>3</sub> N <sub>10</sub> NaSi <sub>2</sub> |
| 524.2066 | 524.2066   | -0.04       | 1.5        | C <sub>17</sub> H <sub>39</sub> O <sub>10</sub> N <sub>3</sub> NaSi <sub>2</sub> |
| 524.2063 | 524.2063   | 0.49        | 0.0        | C <sub>16</sub> H <sub>40</sub> O <sub>13</sub> N <sub>2</sub> Si <sub>2</sub>   |
| 524.2063 | 524.2063   | 0.50        | 5.5        | C <sub>15</sub> H <sub>34</sub> O <sub>8</sub> N <sub>9</sub> Si <sub>2</sub>    |
| 524.2058 | 524.2058   | 1.47        | 18.0       | C <sub>29</sub> H <sub>32</sub> O <sub>2</sub> N <sub>4</sub> Si <sub>2</sub>    |
| 524.2077 | 524.2077   | -2.06       | 5.0        | C <sub>17</sub> H <sub>30</sub> O <sub>9</sub> N <sub>6</sub> Si <sub>2</sub>    |
| 524.2053 | 524.2053   | 2.53        | 2.0        | C <sub>15</sub> H <sub>37</sub> O <sub>9</sub> N <sub>6</sub> NaSi <sub>2</sub>  |
| 524.2080 | 524.2080   | -2.59       | 6.5        | C <sub>18</sub> H <sub>35</sub> O <sub>6</sub> N <sub>7</sub> NaSi <sub>2</sub>  |
| 524.2080 | 524.2080   | -2.60       | 1.0        | C <sub>19</sub> H <sub>41</sub> O <sub>11</sub> NaSi <sub>2</sub>                |
| 524.2050 | 524.2050   | 3.05        | 0.5        | C <sub>14</sub> H <sub>38</sub> O <sub>12</sub> N <sub>5</sub> Si <sub>2</sub>   |
| 524.2050 | 524.2050   | 3.06        | 6.0        | C <sub>13</sub> H <sub>32</sub> O <sub>7</sub> N <sub>12</sub> Si <sub>2</sub>   |
| 524.2048 | 524.2048   | 3.49        | 14.5       | C <sub>29</sub> H <sub>35</sub> O <sub>3</sub> N <sub>3</sub> NaSi <sub>2</sub>  |
| 524.2045 | 524.2045   | 4.02        | 13.0       | C <sub>28</sub> H <sub>30</sub> O <sub>6</sub> Si <sub>2</sub>                   |
| 524.2045 | 524.2045   | 4.03        | 18.5       | C <sub>27</sub> H <sub>30</sub> O <sub>7</sub> Si <sub>2</sub>                   |
| 524.2090 | 524.2090   | -4.61       | 10.0       | C <sub>18</sub> H <sub>32</sub> O <sub>5</sub> N <sub>10</sub> Si <sub>2</sub>   |
| 524.2090 | 524.2090   | -4.62       | 4.5        | C <sub>19</sub> H <sub>36</sub> O <sub>10</sub> N <sub>3</sub> Si <sub>2</sub>   |

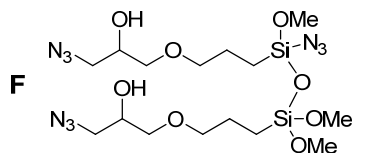

Chemical Formula: C<sub>15</sub>H<sub>33</sub>N<sub>9</sub>O<sub>8</sub>Si<sub>2</sub>  
Exact Mass: 523.20

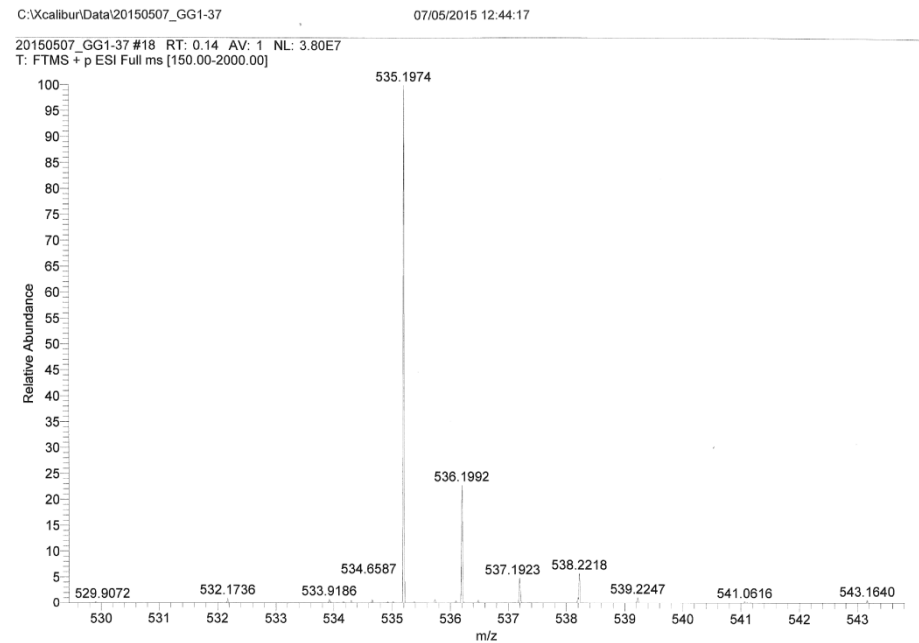

Elemental composition search on mass 535.20

| m/z      | Theo. Mass | Delta (ppm) | RDB equiv. | Composition                                                                      |
|----------|------------|-------------|------------|----------------------------------------------------------------------------------|
| 535.1974 | 535.1975   | -0.11       | 3.5        | C <sub>16</sub> H <sub>36</sub> O <sub>9</sub> N <sub>6</sub> NaSi <sub>2</sub>  |
| 535.1972 | 535.1972   | 0.40        | 2.0        | C <sub>15</sub> H <sub>37</sub> O <sub>12</sub> N <sub>5</sub> Si <sub>2</sub>   |
| 535.1972 | 535.1972   | 0.41        | 7.5        | C <sub>14</sub> H <sub>31</sub> O <sub>7</sub> N <sub>12</sub> Si <sub>2</sub>   |
| 535.1969 | 535.1969   | 0.83        | 16.0       | C <sub>30</sub> H <sub>34</sub> O <sub>3</sub> N <sub>3</sub> NaSi <sub>2</sub>  |
| 535.1980 | 535.1980   | -1.15       | 19.5       | C <sub>30</sub> H <sub>31</sub> O <sub>2</sub> N <sub>4</sub> Si <sub>2</sub>    |
| 535.1967 | 535.1967   | 1.35        | 14.5       | C <sub>29</sub> H <sub>30</sub> O <sub>6</sub> Si <sub>2</sub>                   |
| 535.1967 | 535.1967   | 1.36        | 20.0       | C <sub>28</sub> H <sub>29</sub> O <sub>7</sub> Si <sub>2</sub>                   |
| 535.1985 | 535.1985   | -2.10       | 7.0        | C <sub>16</sub> H <sub>33</sub> O <sub>8</sub> N <sub>9</sub> Si <sub>2</sub>    |
| 535.1985 | 535.1985   | -2.11       | 1.5        | C <sub>17</sub> H <sub>39</sub> O <sub>13</sub> N <sub>2</sub> Si <sub>2</sub>   |
| 535.1961 | 535.1961   | 2.40        | 4.0        | C <sub>14</sub> H <sub>34</sub> O <sub>8</sub> N <sub>9</sub> NaSi <sub>2</sub>  |
| 535.1988 | 535.1988   | -2.61       | 8.5        | C <sub>17</sub> H <sub>32</sub> O <sub>5</sub> N <sub>10</sub> NaSi <sub>2</sub> |
| 535.1988 | 535.1988   | -2.62       | 3.0        | C <sub>18</sub> H <sub>36</sub> O <sub>10</sub> N <sub>3</sub> NaSi <sub>2</sub> |
| 535.1958 | 535.1958   | 2.91        | 2.5        | C <sub>13</sub> H <sub>30</sub> O <sub>11</sub> N <sub>8</sub> Si <sub>2</sub>   |
| 535.1956 | 535.1956   | 3.34        | 16.5       | C <sub>28</sub> H <sub>32</sub> O <sub>2</sub> N <sub>4</sub> NaSi <sub>2</sub>  |
| 535.1953 | 535.1953   | 3.86        | 15.0       | C <sub>27</sub> H <sub>33</sub> O <sub>5</sub> N <sub>3</sub> Si <sub>2</sub>    |
| 535.1953 | 535.1953   | 3.87        | 20.5       | C <sub>26</sub> H <sub>27</sub> N <sub>10</sub> Si <sub>2</sub>                  |
| 535.1999 | 535.1999   | -4.61       | 6.5        | C <sub>18</sub> H <sub>35</sub> O <sub>9</sub> N <sub>6</sub> Si <sub>2</sub>    |
| 535.1948 | 535.1948   | 4.89        | -1.0       | C <sub>13</sub> H <sub>30</sub> O <sub>12</sub> N <sub>5</sub> NaSi <sub>2</sub> |
| 535.1948 | 535.1948   | 4.90        | 4.5        | C <sub>12</sub> H <sub>32</sub> O <sub>7</sub> N <sub>12</sub> NaSi <sub>2</sub> |

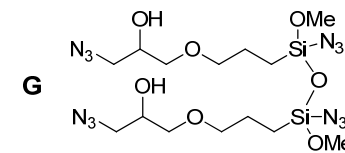

Chemical Formula: C<sub>14</sub>H<sub>30</sub>N<sub>12</sub>O<sub>7</sub>Si<sub>2</sub>  
Exact Mass: 534.19

Figure SI\_165: HRMS-ESI spectra of the molecular peaks ( $[M+H]^+$ ) of compounds F (left) & G (right).

# SI\_166

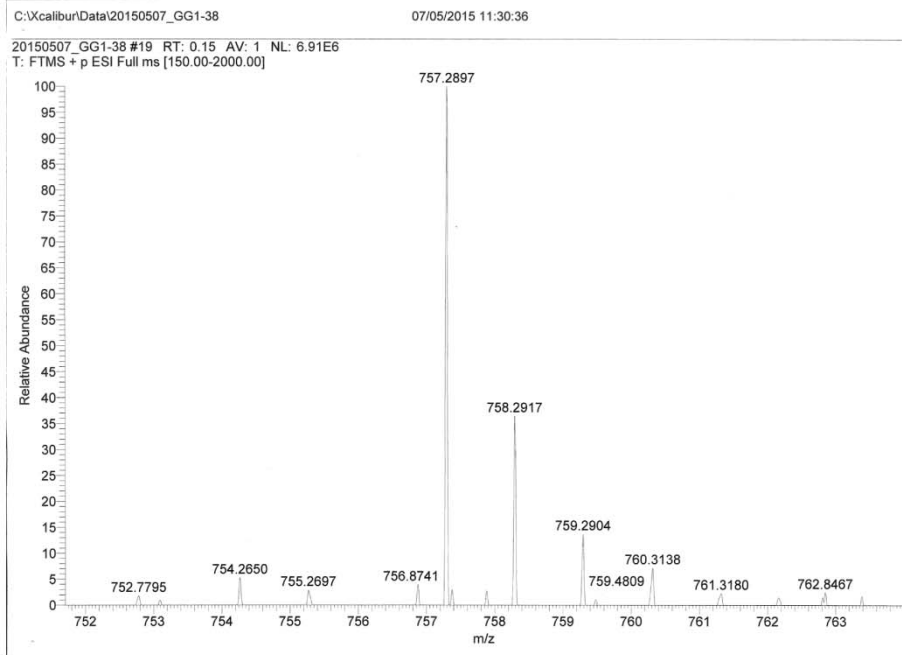

Elemental composition search on mass 757.29

| m/z      | Theo. Mass | Delta (ppm) | RB equiv. | Composition                                                                        |
|----------|------------|-------------|-----------|------------------------------------------------------------------------------------|
| 757.2897 | 757.2898   | -0.09       | 3.5       | C <sub>24</sub> H <sub>54</sub> O <sub>14</sub> N <sub>6</sub> NaSi <sub>3</sub> ← |
|          | 757.2895   | 0.28        | 7.5       | C <sub>22</sub> H <sub>49</sub> O <sub>12</sub> N <sub>12</sub> Si <sub>3</sub>    |
|          | 757.2909   | -1.50       | 7.0       | C <sub>24</sub> H <sub>51</sub> O <sub>13</sub> N <sub>9</sub> Si <sub>3</sub>     |
|          | 757.2885   | 1.68        | 4.0       | C <sub>22</sub> H <sub>52</sub> O <sub>13</sub> N <sub>9</sub> NaSi <sub>3</sub>   |
|          | 757.2911   | -1.86       | 8.5       | C <sub>25</sub> H <sub>50</sub> O <sub>10</sub> N <sub>10</sub> NaSi <sub>3</sub>  |
|          | 757.2911   | -1.87       | 3.0       | C <sub>26</sub> H <sub>56</sub> O <sub>15</sub> N <sub>3</sub> NaSi <sub>3</sub>   |
|          | 757.2922   | -3.27       | 6.5       | C <sub>26</sub> H <sub>53</sub> O <sub>14</sub> N <sub>6</sub> Si <sub>3</sub>     |
|          | 757.2871   | 3.45        | 4.5       | C <sub>20</sub> H <sub>50</sub> O <sub>12</sub> N <sub>12</sub> NaSi <sub>3</sub>  |
|          | 757.2925   | -3.63       | 8.0       | C <sub>27</sub> H <sub>52</sub> O <sub>11</sub> N <sub>7</sub> NaSi <sub>3</sub>   |
|          | 757.2868   | 3.82        | 3.0       | C <sub>19</sub> H <sub>51</sub> O <sub>15</sub> N <sub>11</sub> Si <sub>3</sub>    |

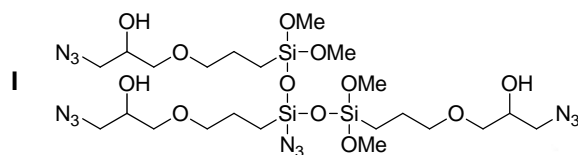

Chemical Formula: C<sub>22</sub>H<sub>48</sub>N<sub>12</sub>O<sub>12</sub>Si<sub>3</sub>  
Exact Mass: 756.28

Figure SI\_166: HRMS-ESI spectrum of the molecular peaks ( $[M+H]^+$ ) of compounds I.

# SI\_167

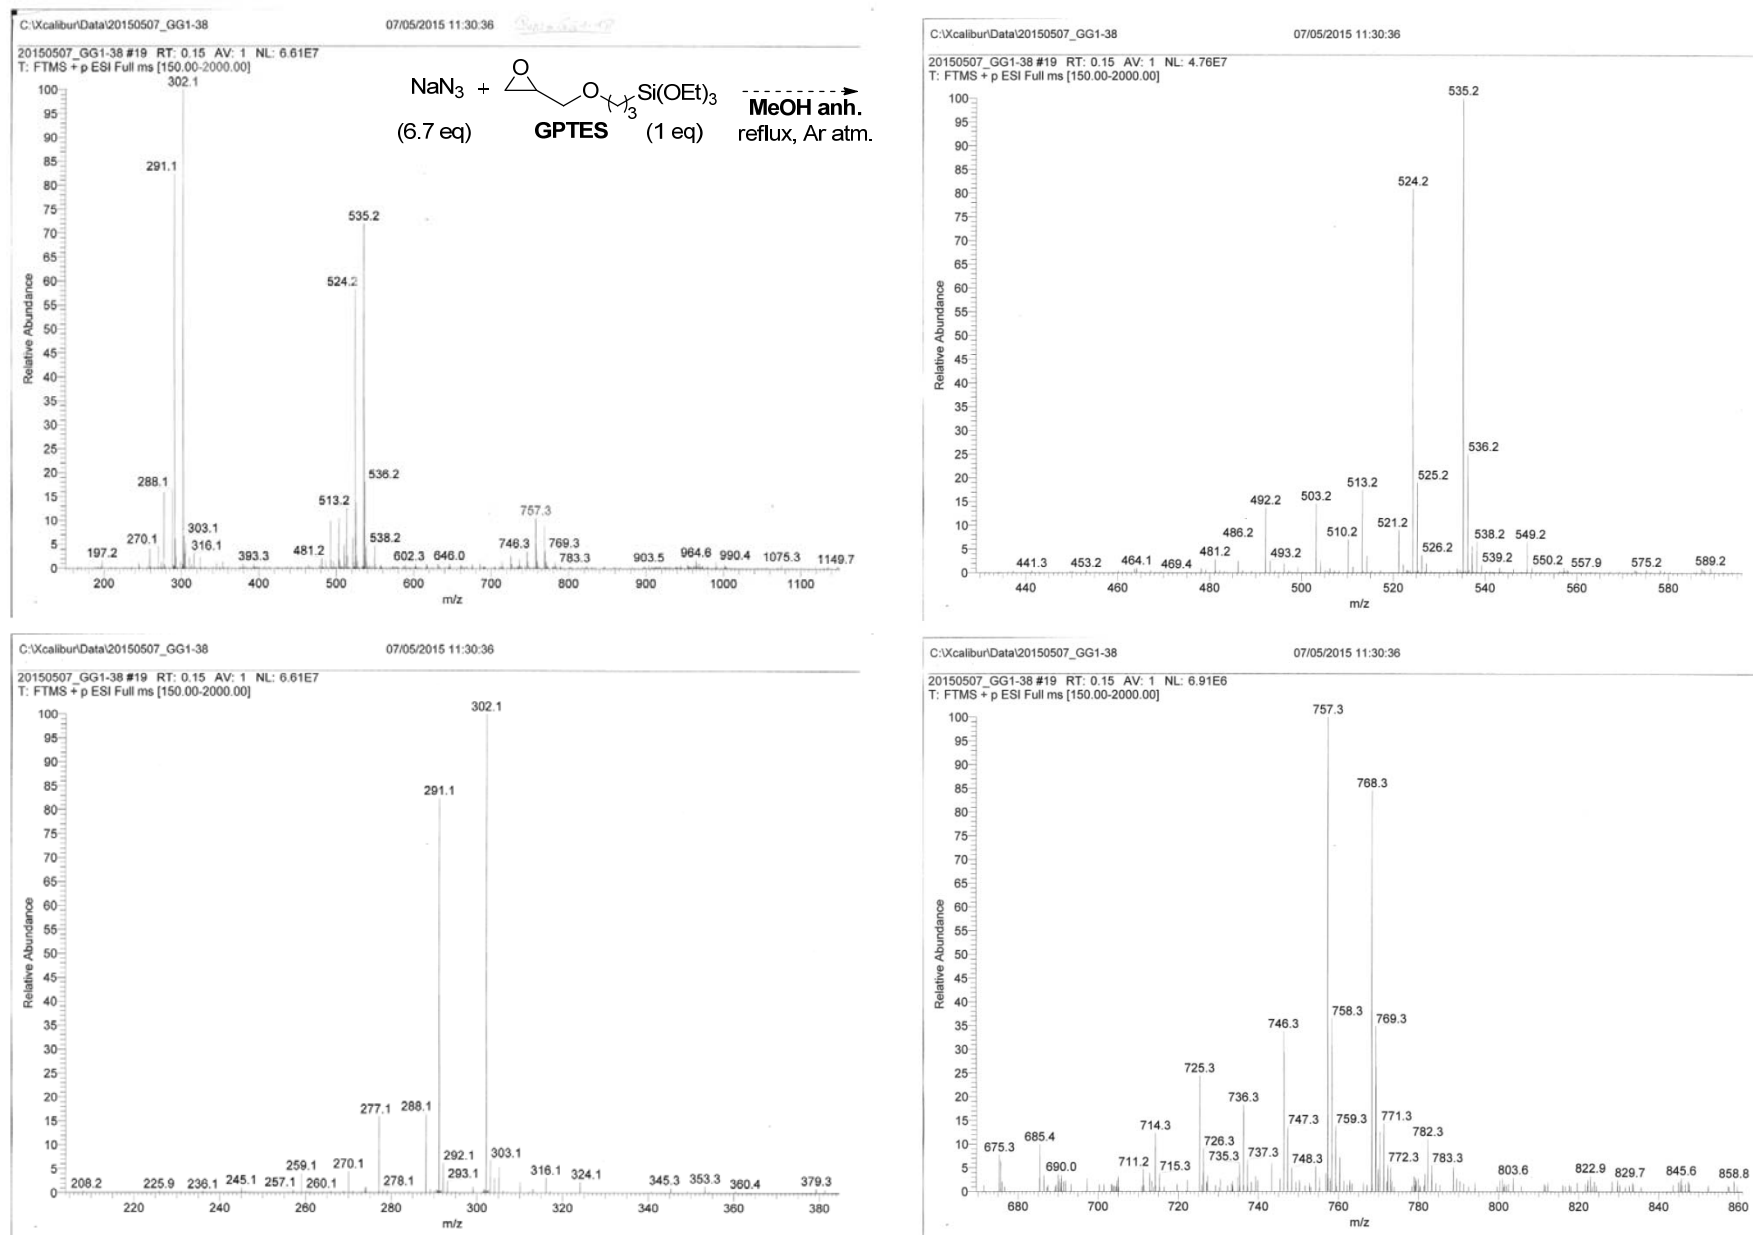

Figure SI\_167: MS-ESI spectra (with zoom) of the crude mixture after 5h of reaction between  $\text{NaN}_3$  and GPTES in refluxing methanol.

# SI\_168

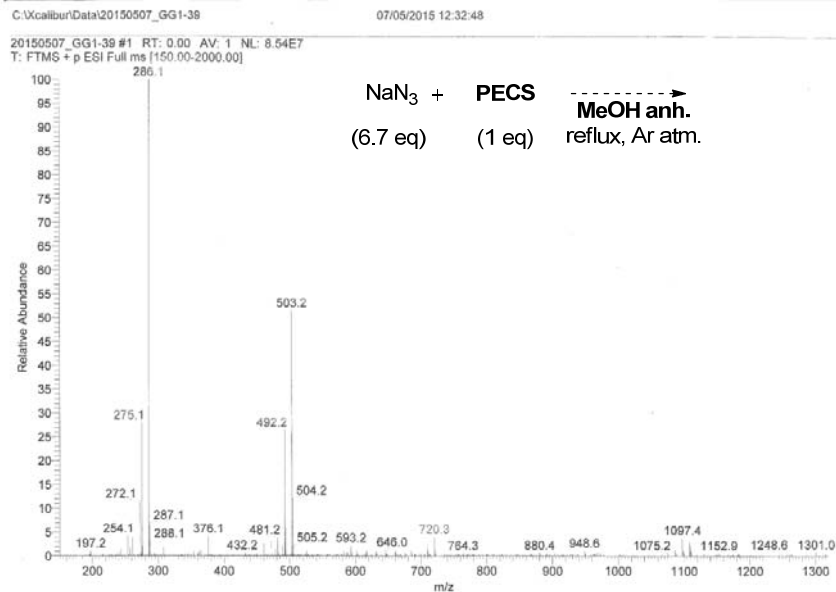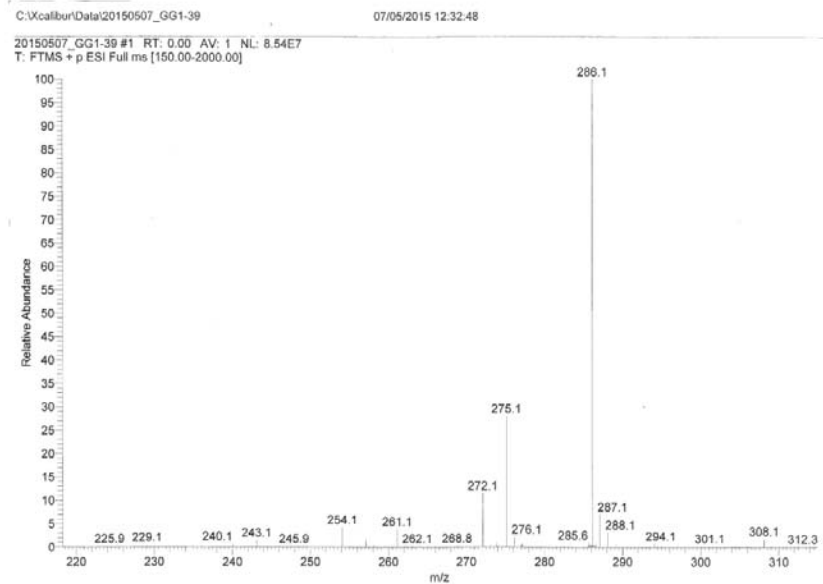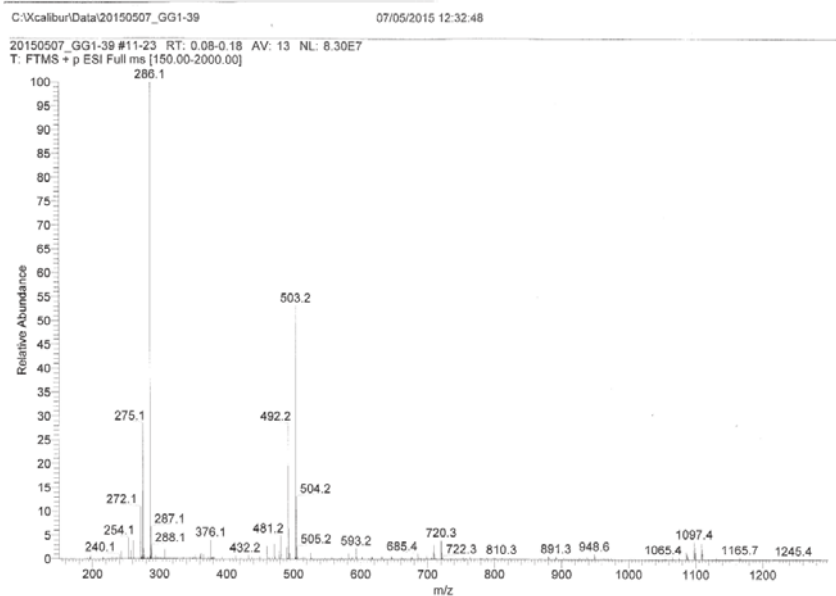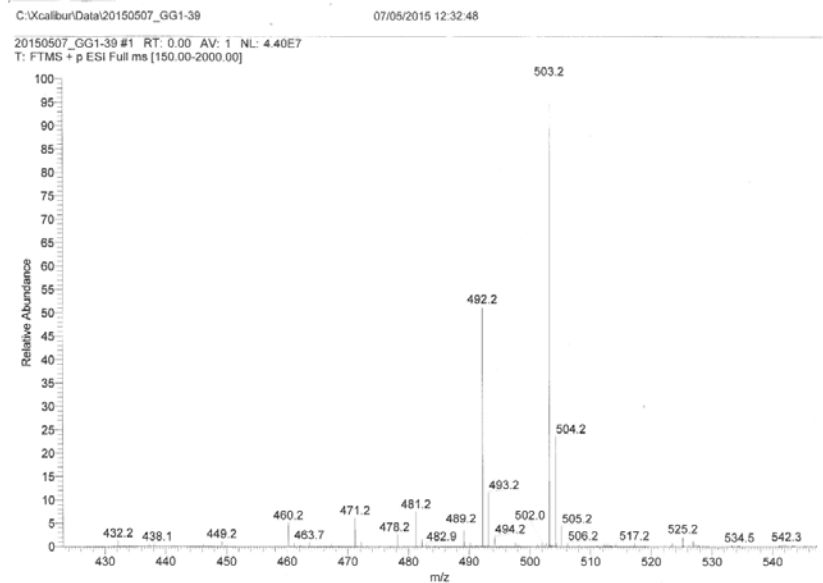

Figure SI\_168: MS-ESI spectra (with zoom) of the crude mixture after 5h of reaction between  $\text{NaN}_3$  and PECS in refluxing methanol.

# SI\_169

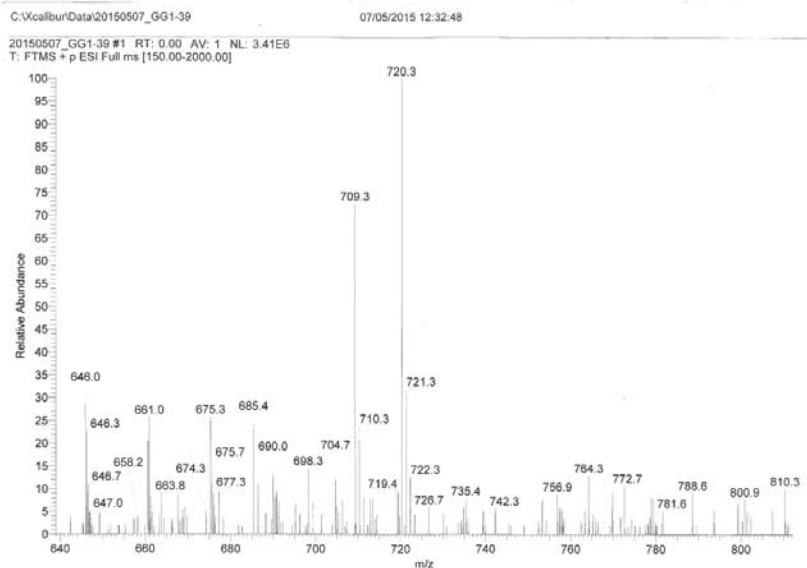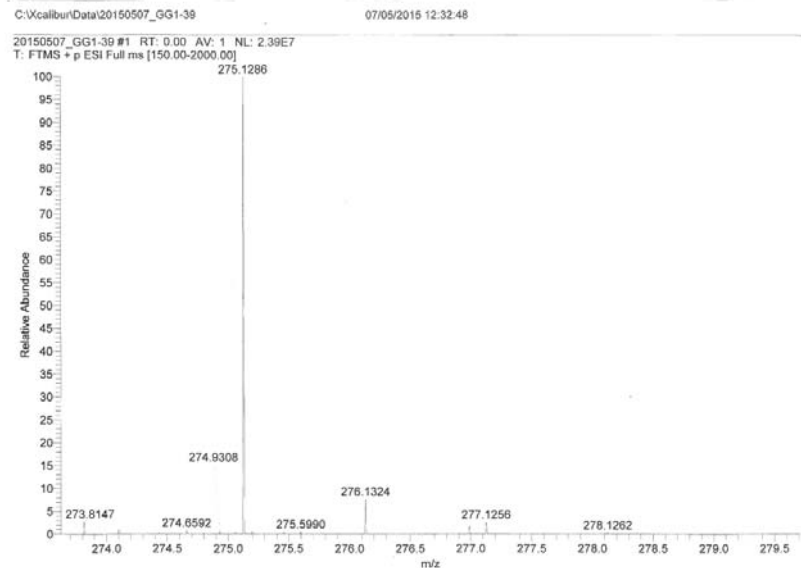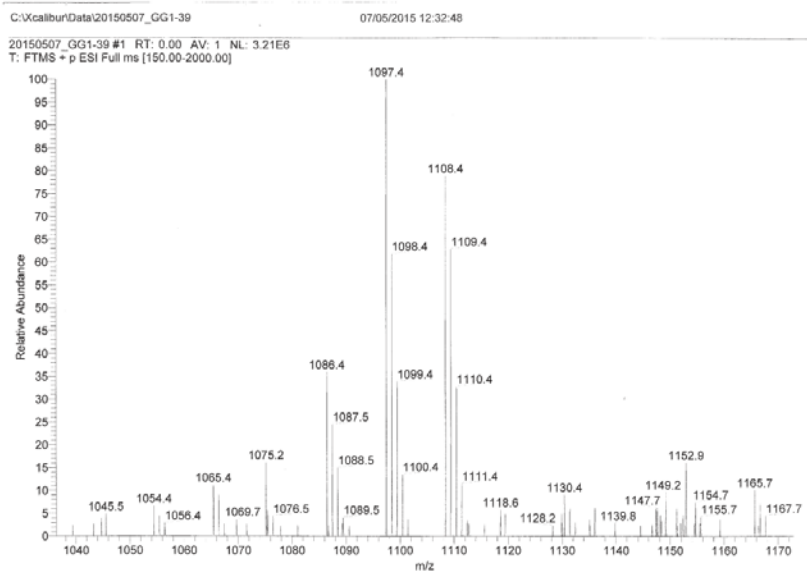

Elemental composition search on mass 275.13

| m/z      | Theo. Mass | Delta (ppm) | RDB equiv. | Composition                                                      |
|----------|------------|-------------|------------|------------------------------------------------------------------|
| 275.1286 | 275.1285   | 0.29        | -0.5       | C <sub>10</sub> H <sub>24</sub> O <sub>5</sub> NaSi ✓            |
| 275.1285 | 275.1285   | 0.30        | 5.0        | C <sub>9</sub> H <sub>18</sub> N <sub>7</sub> NaSi               |
| 275.1282 | 275.1282   | 1.30        | 3.5        | C <sub>8</sub> H <sub>18</sub> O <sub>3</sub> N <sub>6</sub> Si  |
| 275.1291 | 275.1291   | -1.90       | 12.5       | C <sub>17</sub> H <sub>15</sub> N <sub>4</sub>                   |
| 275.1281 | 275.1281   | 1.96        | 9.0        | C <sub>17</sub> H <sub>18</sub> ONNa                             |
| 275.1278 | 275.1278   | 2.96        | 7.5        | C <sub>18</sub> H <sub>19</sub> O <sub>4</sub>                   |
| 275.1296 | 275.1296   | -3.58       | 3.0        | C <sub>18</sub> H <sub>21</sub> O <sub>4</sub> N <sub>3</sub> Si |
| 275.1296 | 275.1296   | -3.75       | 0.0        | C <sub>3</sub> H <sub>17</sub> O <sub>6</sub> N <sub>9</sub>     |
| 275.1299 | 275.1299   | -4.58       | 4.5        | C <sub>11</sub> H <sub>20</sub> O <sub>4</sub> NaSi              |
| 275.1299 | 275.1299   | -4.75       | 1.5        | C <sub>6</sub> H <sub>14</sub> O <sub>3</sub> N <sub>10</sub> Na |

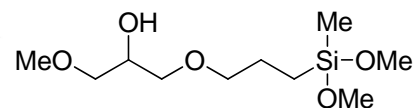

Chemical Formula: C<sub>10</sub>H<sub>24</sub>O<sub>5</sub>Si  
 Exact Mass: 252.14

or

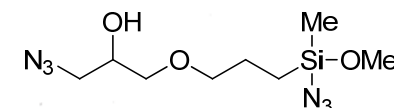

Chemical Formula: C<sub>8</sub>H<sub>18</sub>N<sub>6</sub>O<sub>3</sub>Si  
 Exact Mass: 274.12

Figure SI\_169: MS-ESI zoom spectra (left) and proposed structures for the specie at 275.1286 m/z.

# SI\_170

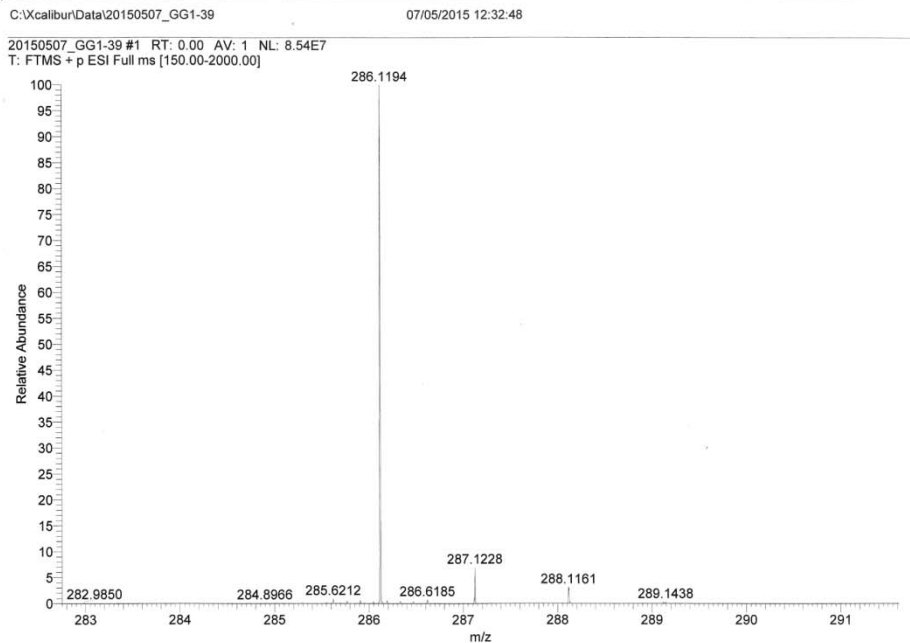

Elemental composition search on mass 286.12

| m/z      | Theo. Mass | Delta (ppm) | RDB equiv. | Composition                                                                  |
|----------|------------|-------------|------------|------------------------------------------------------------------------------|
| 286.1194 | 286.1194   | 0.23        | 1.5        | C <sub>9</sub> H <sub>21</sub> O <sub>4</sub> N <sub>3</sub> NaSi            |
| 286.1191 | 286.1191   | 1.05        | 2.5        | H <sub>12</sub> O <sub>4</sub> N <sub>15</sub>                               |
| 286.1198 | 286.1198   | -1.20       | 0.5        | C <sub>8</sub> H <sub>25</sub> O <sub>3</sub> NaSi <sub>3</sub>              |
| 286.1191 | 286.1191   | 1.21        | 5.5        | C <sub>7</sub> H <sub>16</sub> O <sub>2</sub> N <sub>9</sub> Si              |
| 286.1190 | 286.1190   | 1.37        | 8.5        | C <sub>14</sub> H <sub>20</sub> N <sub>3</sub> Si <sub>2</sub>               |
| 286.1186 | 286.1186   | 2.80        | 9.5        | C <sub>15</sub> H <sub>16</sub> O <sub>3</sub> N <sub>3</sub>                |
| 286.1202 | 286.1202   | -2.85       | 10.5       | C <sub>18</sub> H <sub>17</sub> ONa                                          |
| 286.1205 | 286.1205   | -3.63       | 7.5        | C <sub>8</sub> H <sub>9</sub> N <sub>19</sub>                                |
| 286.1207 | 286.1207   | -4.44       | 6.5        | C <sub>10</sub> H <sub>17</sub> N <sub>7</sub> NaSi                          |
| 286.1181 | 286.1181   | 4.45        | -0.5       | C <sub>5</sub> H <sub>24</sub> O <sub>3</sub> N <sub>5</sub> Si <sub>3</sub> |
| 286.1207 | 286.1207   | -4.61       | 3.5        | C <sub>3</sub> H <sub>13</sub> O <sub>2</sub> N <sub>13</sub> Na             |

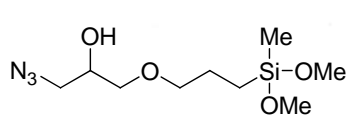

Chemical Formula: C<sub>9</sub>H<sub>21</sub>N<sub>3</sub>O<sub>4</sub>Si  
Exact Mass: 263.13

or

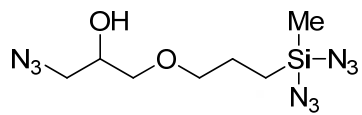

Chemical Formula: C<sub>7</sub>H<sub>15</sub>N<sub>9</sub>O<sub>2</sub>Si  
Exact Mass: 285.11

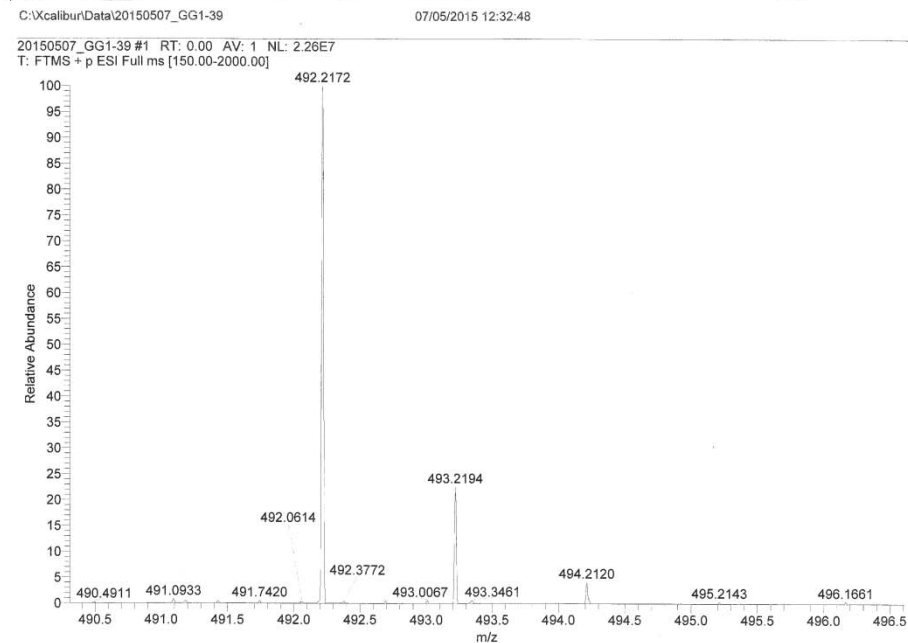

Elemental composition search on mass 492.22

| m/z      | Theo. Mass | Delta (ppm) | RDB equiv. | Composition                                                                      |
|----------|------------|-------------|------------|----------------------------------------------------------------------------------|
| 492.2172 | 492.2174   | -0.41       | 14.5       | C <sub>24</sub> H <sub>30</sub> O <sub>3</sub> N <sub>7</sub> Si                 |
| 492.2174 | 492.2174   | -0.42       | 9.0        | C <sub>25</sub> H <sub>36</sub> O <sub>8</sub> Si                                |
| 492.2174 | 492.2174   | -0.51       | 6.0        | C <sub>18</sub> H <sub>32</sub> O <sub>10</sub> Ne                               |
| 492.2168 | 492.2168   | 0.81        | 1.5        | C <sub>17</sub> H <sub>39</sub> O <sub>8</sub> N <sub>3</sub> NaSi <sub>2</sub>  |
| 492.2168 | 492.2168   | 0.82        | 7.0        | C <sub>16</sub> H <sub>33</sub> O <sub>3</sub> N <sub>10</sub> NaSi <sub>2</sub> |
| 492.2177 | 492.2177   | -0.97       | 16.0       | C <sub>25</sub> H <sub>29</sub> N <sub>8</sub> NaSi                              |
| 492.2177 | 492.2177   | -0.98       | 10.5       | C <sub>26</sub> H <sub>35</sub> O <sub>5</sub> N <sub>5</sub> NaSi               |
| 492.2177 | 492.2177   | -1.07       | 7.5        | C <sub>19</sub> H <sub>31</sub> O <sub>7</sub> N <sub>7</sub> Na                 |
| 492.2177 | 492.2177   | -1.08       | 2.0        | C <sub>20</sub> H <sub>37</sub> O <sub>12</sub> Na                               |
| 492.2179 | 492.2179   | -1.34       | 5.0        | C <sub>17</sub> H <sub>35</sub> O <sub>7</sub> N <sub>6</sub> Si <sub>2</sub>    |
| 492.2165 | 492.2165   | 1.37        | 0.0        | C <sub>16</sub> H <sub>40</sub> O <sub>11</sub> N <sub>2</sub> Si <sub>2</sub>   |
| 492.2165 | 492.2165   | 1.38        | 5.5        | C <sub>15</sub> H <sub>34</sub> O <sub>6</sub> N <sub>9</sub> Si <sub>2</sub>    |
| 492.2164 | 492.2164   | 1.65        | 2.5        | C <sub>18</sub> H <sub>35</sub> O <sub>11</sub> N <sub>3</sub> Na                |
| 492.2164 | 492.2164   | 1.66        | 8.0        | C <sub>17</sub> H <sub>29</sub> O <sub>6</sub> N <sub>10</sub> Na                |
| 492.2163 | 492.2163   | 1.75        | 11.0       | C <sub>24</sub> H <sub>33</sub> O <sub>4</sub> N <sub>4</sub> NaSi               |
| 492.2181 | 492.2181   | -1.90       | 6.5        | C <sub>18</sub> H <sub>35</sub> O <sub>4</sub> N <sub>7</sub> NaSi <sub>2</sub>  |
| 492.2181 | 492.2181   | -1.91       | 1.0        | C <sub>19</sub> H <sub>41</sub> O <sub>9</sub> NaSi <sub>2</sub>                 |
| 492.2161 | 492.2161   | 2.20        | 1.0        | C <sub>17</sub> H <sub>36</sub> O <sub>14</sub> N <sub>2</sub>                   |
| 492.2161 | 492.2161   | 2.21        | 6.5        | C <sub>16</sub> H <sub>30</sub> O <sub>9</sub> N <sub>9</sub>                    |
| 492.2161 | 492.2161   | 2.31        | 9.5        | C <sub>23</sub> H <sub>34</sub> O <sub>7</sub> N <sub>3</sub> Si                 |

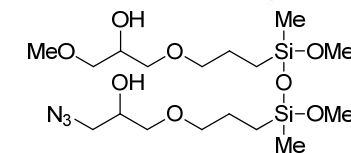

Chemical Formula: C<sub>17</sub>H<sub>39</sub>N<sub>3</sub>O<sub>8</sub>Si<sub>2</sub>  
Exact Mass: 469.23

or

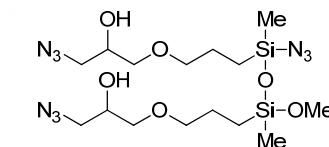

Chemical Formula: C<sub>15</sub>H<sub>33</sub>N<sub>9</sub>O<sub>6</sub>Si<sub>2</sub>  
Exact Mass: 491.21

Figure SI\_170: Proposed structures for the species at 286.1194 m/z (left) and 492.2172 m/z (right).

# SI\_171

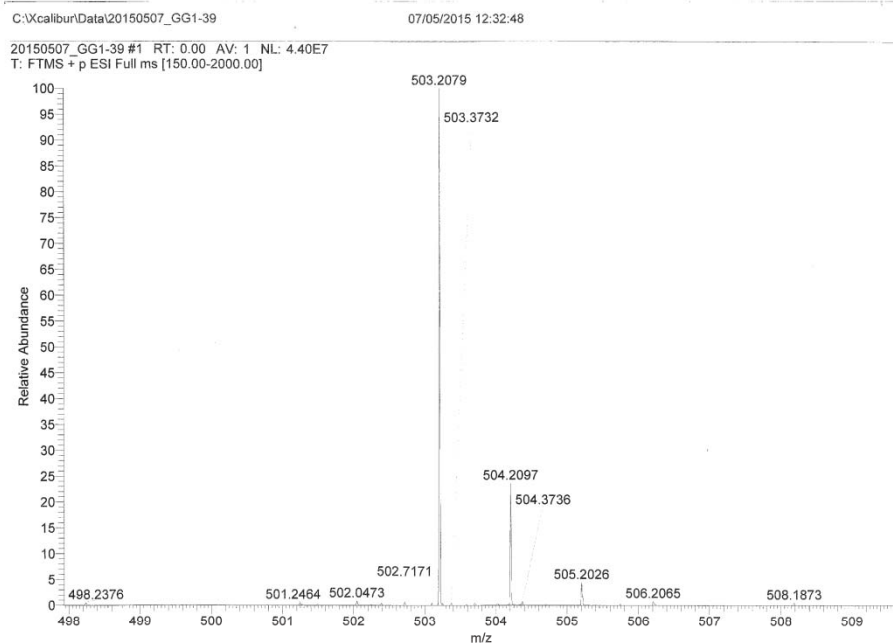

Elemental composition search on mass 503.21

| m/z      | Theo. Mass | Delta (ppm) | RDB equiv. | Composition                                                                       |
|----------|------------|-------------|------------|-----------------------------------------------------------------------------------|
| 503.2079 | 503.2082   | -0.45       | 19.5       | C <sub>30</sub> H <sub>31</sub> N <sub>4</sub> Si <sub>2</sub>                    |
|          | 503.2082   | -0.54       | 16.5       | C <sub>23</sub> H <sub>27</sub> O <sub>2</sub> N <sub>10</sub> Si                 |
|          | 503.2082   | -0.55       | 11.0       | C <sub>24</sub> H <sub>33</sub> O <sub>7</sub> N <sub>3</sub> Si                  |
|          | 503.2083   | -0.65       | 8.0        | C <sub>17</sub> H <sub>29</sub> O <sub>9</sub> N <sub>9</sub>                     |
|          | 503.2076   | 0.65        | 3.5        | C <sub>16</sub> H <sub>36</sub> O <sub>7</sub> N <sub>6</sub> NaSi <sub>2</sub> ✓ |
|          | 503.2083   | -0.66       | 2.5        | C <sub>18</sub> H <sub>35</sub> O <sub>14</sub> N <sub>2</sub>                    |
|          | 503.2085   | -1.10       | 12.5       | C <sub>25</sub> H <sub>32</sub> O <sub>4</sub> N <sub>4</sub> NaSi                |
|          | 503.2085   | -1.19       | 9.5        | C <sub>18</sub> H <sub>28</sub> O <sub>6</sub> N <sub>10</sub> Na                 |
|          | 503.2073   | 1.20        | 2.0        | C <sub>15</sub> H <sub>37</sub> O <sub>10</sub> N <sub>5</sub> Si <sub>2</sub>    |
|          | 503.2086   | -1.20       | 4.0        | C <sub>19</sub> H <sub>34</sub> O <sub>11</sub> N <sub>3</sub> Na                 |
|          | 503.2087   | -1.46       | 7.0        | C <sub>16</sub> H <sub>33</sub> O <sub>6</sub> N <sub>9</sub> Si <sub>2</sub>     |
|          | 503.2072   | 1.47        | 4.5        | C <sub>17</sub> H <sub>32</sub> O <sub>10</sub> N <sub>6</sub> Na                 |
|          | 503.2087   | -1.47       | 1.5        | C <sub>17</sub> H <sub>39</sub> O <sub>11</sub> N <sub>2</sub> Si <sub>2</sub>    |
|          | 503.2072   | 1.56        | 7.5        | C <sub>24</sub> H <sub>36</sub> O <sub>8</sub> NaSi                               |
|          | 503.2072   | 1.57        | 13.0       | C <sub>23</sub> H <sub>30</sub> O <sub>3</sub> N <sub>7</sub> NaSi                |
|          | 503.2071   | 1.66        | 16.0       | C <sub>30</sub> H <sub>34</sub> O <sub>N</sub> NaSi <sub>2</sub>                  |
|          | 503.2090   | -2.01       | 8.5        | C <sub>17</sub> H <sub>32</sub> O <sub>3</sub> N <sub>10</sub> NaSi <sub>2</sub>  |
|          | 503.2069   | 2.01        | 3.0        | C <sub>16</sub> H <sub>33</sub> O <sub>13</sub> N <sub>5</sub>                    |
|          | 503.2090   | -2.02       | 3.0        | C <sub>18</sub> H <sub>38</sub> O <sub>8</sub> N <sub>3</sub> NaSi <sub>2</sub>   |
|          | 503.2090   | -2.11       | 0.0        | C <sub>11</sub> H <sub>34</sub> O <sub>10</sub> N <sub>9</sub> NaSi               |

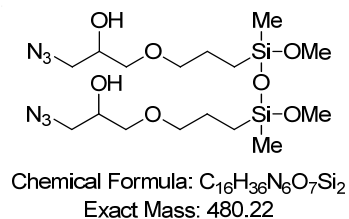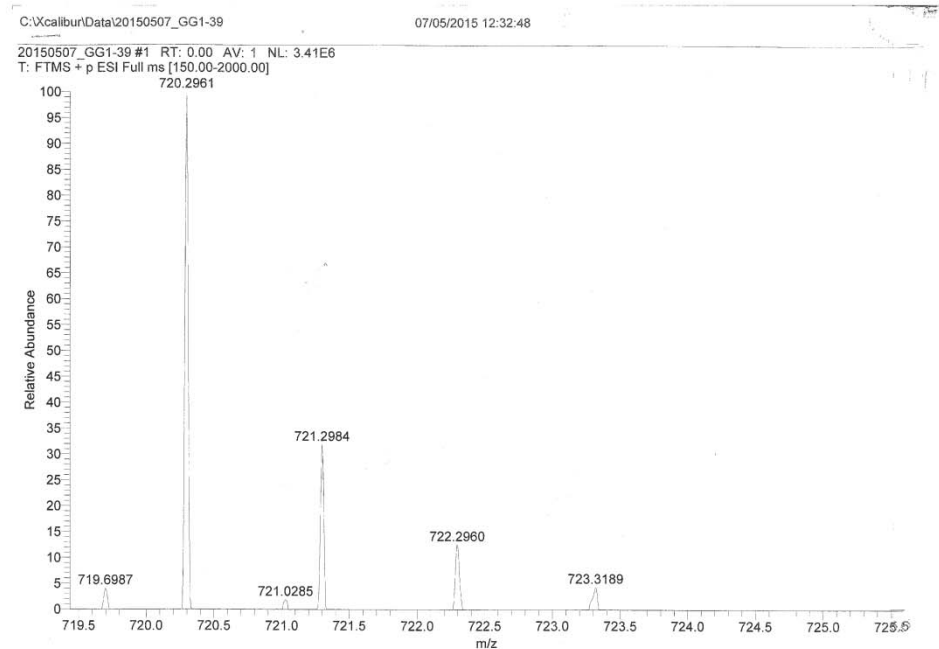

Elemental composition search on mass 720.30

| m/z      | Theo. Mass | Delta (ppm) | RDB equiv. | Composition                                                                      |
|----------|------------|-------------|------------|----------------------------------------------------------------------------------|
| 720.2961 | 720.2956   | 0.74        | 9.5        | C <sub>21</sub> H <sub>46</sub> O <sub>8</sub> N <sub>15</sub> Si <sub>3</sub> ✓ |
|          | 720.2956   | 0.80        | 12.5       | C <sub>28</sub> H <sub>50</sub> O <sub>6</sub> N <sub>9</sub> Si <sub>4</sub>    |
|          | 720.2970   | -1.13       | 3.5        | C <sub>24</sub> H <sub>54</sub> O <sub>14</sub> N <sub>5</sub> Si <sub>3</sub>   |
|          | 720.2951   | 1.43        | 16.5       | C <sub>36</sub> H <sub>50</sub> O <sub>7</sub> N <sub>3</sub> Si <sub>3</sub>    |
|          | 720.2943   | 2.59        | 4.5        | C <sub>20</sub> H <sub>50</sub> O <sub>12</sub> N <sub>11</sub> Si <sub>3</sub>  |
|          | 720.2942   | 2.66        | 7.5        | C <sub>27</sub> H <sub>54</sub> O <sub>10</sub> N <sub>5</sub> Si <sub>4</sub>   |
|          | 720.2982   | -2.93       | 11.5       | C <sub>32</sub> H <sub>54</sub> O <sub>8</sub> N <sub>3</sub> Si <sub>4</sub>    |
|          | 720.2983   | -2.99       | 8.5        | C <sub>25</sub> H <sub>50</sub> O <sub>10</sub> N <sub>9</sub> Si <sub>3</sub>   |
|          | 720.2991   | -4.15       | 20.5       | C <sub>41</sub> H <sub>50</sub> O <sub>5</sub> N <sub>5</sub> Si <sub>3</sub>    |
|          | 720.2929   | 4.52        | 2.5        | C <sub>26</sub> H <sub>58</sub> O <sub>14</sub> N <sub>8</sub> Si <sub>4</sub>   |
|          | 720.2996   | -4.85       | 13.5       | C <sub>26</sub> H <sub>46</sub> O <sub>6</sub> N <sub>13</sub> Si <sub>3</sub>   |

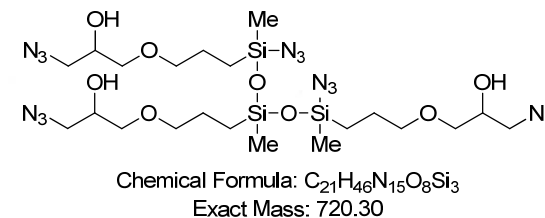

Figure SI\_171: Proposed structures for the species at 503.2079 m/z (left) and 720.2961 m/z (right).

# SI\_172

GG1-30b 1H CDC13

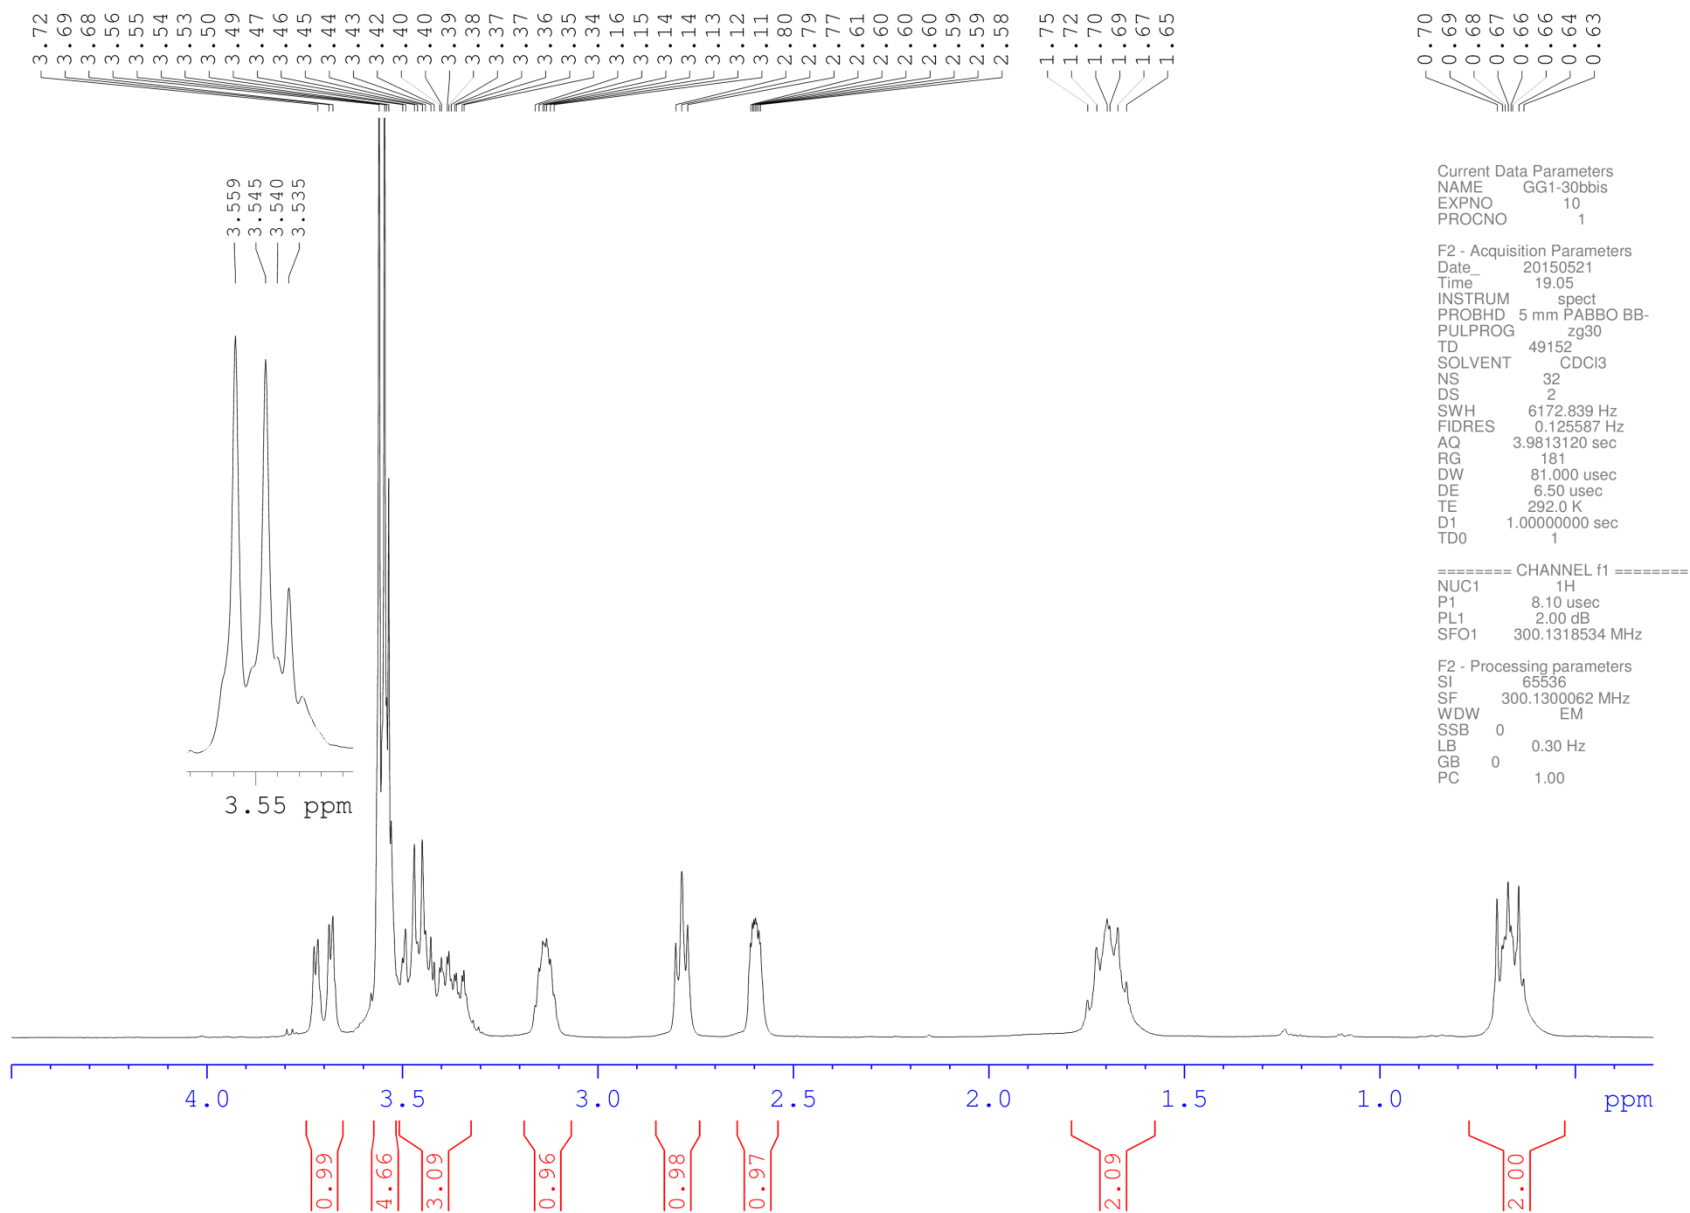

Figure SI\_172: <sup>1</sup>H NMR spectrum of the crude mixture of the reaction between sodium ethoxide and GPTMS in THF (rt, 5h). (Scheme 8 (a.) in article)



# SI\_173

GG1-31b 1H CDC13

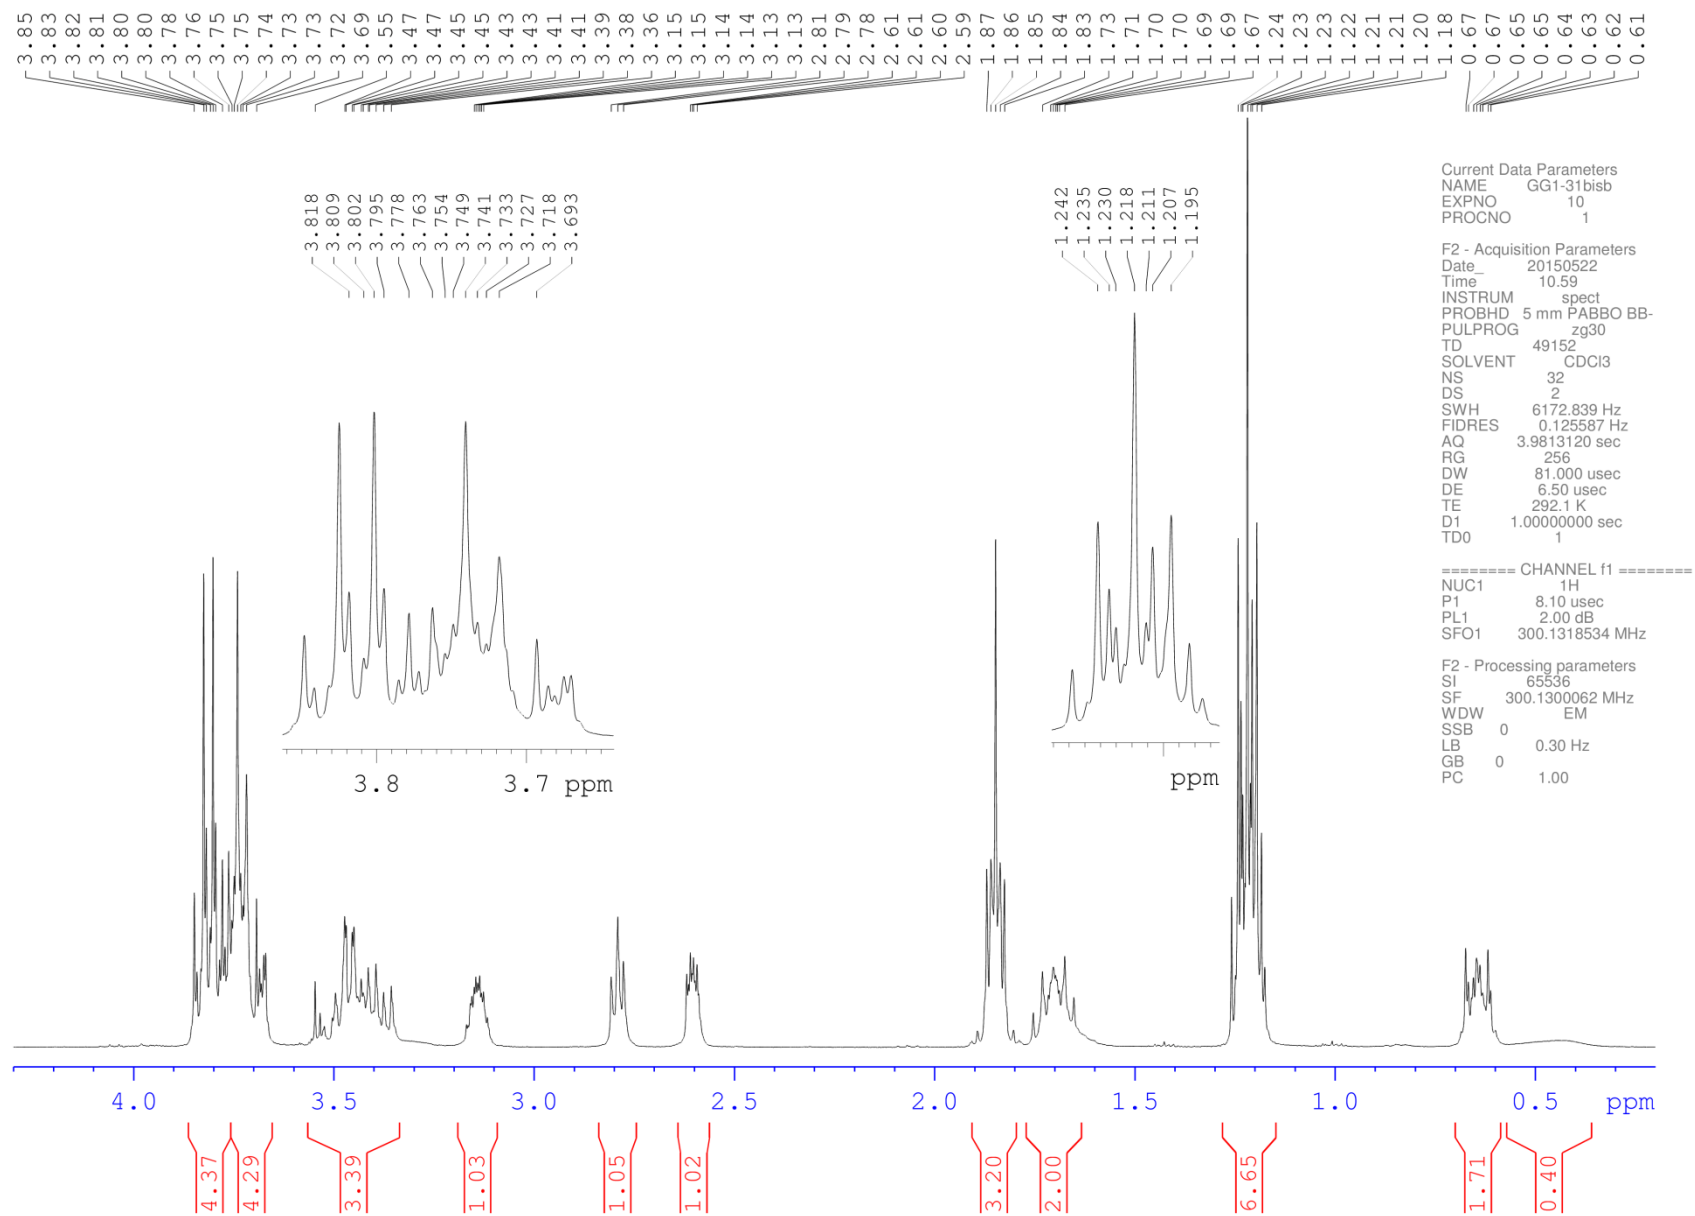

Figure SI\_173: <sup>1</sup>H NMR spectrum of the crude mixture of the reaction between sodium methoxide and GPTEs in THF (rt, 8h). (Scheme 8 (b.) in article)

# SI\_174

XG2-83b 1H CDC13

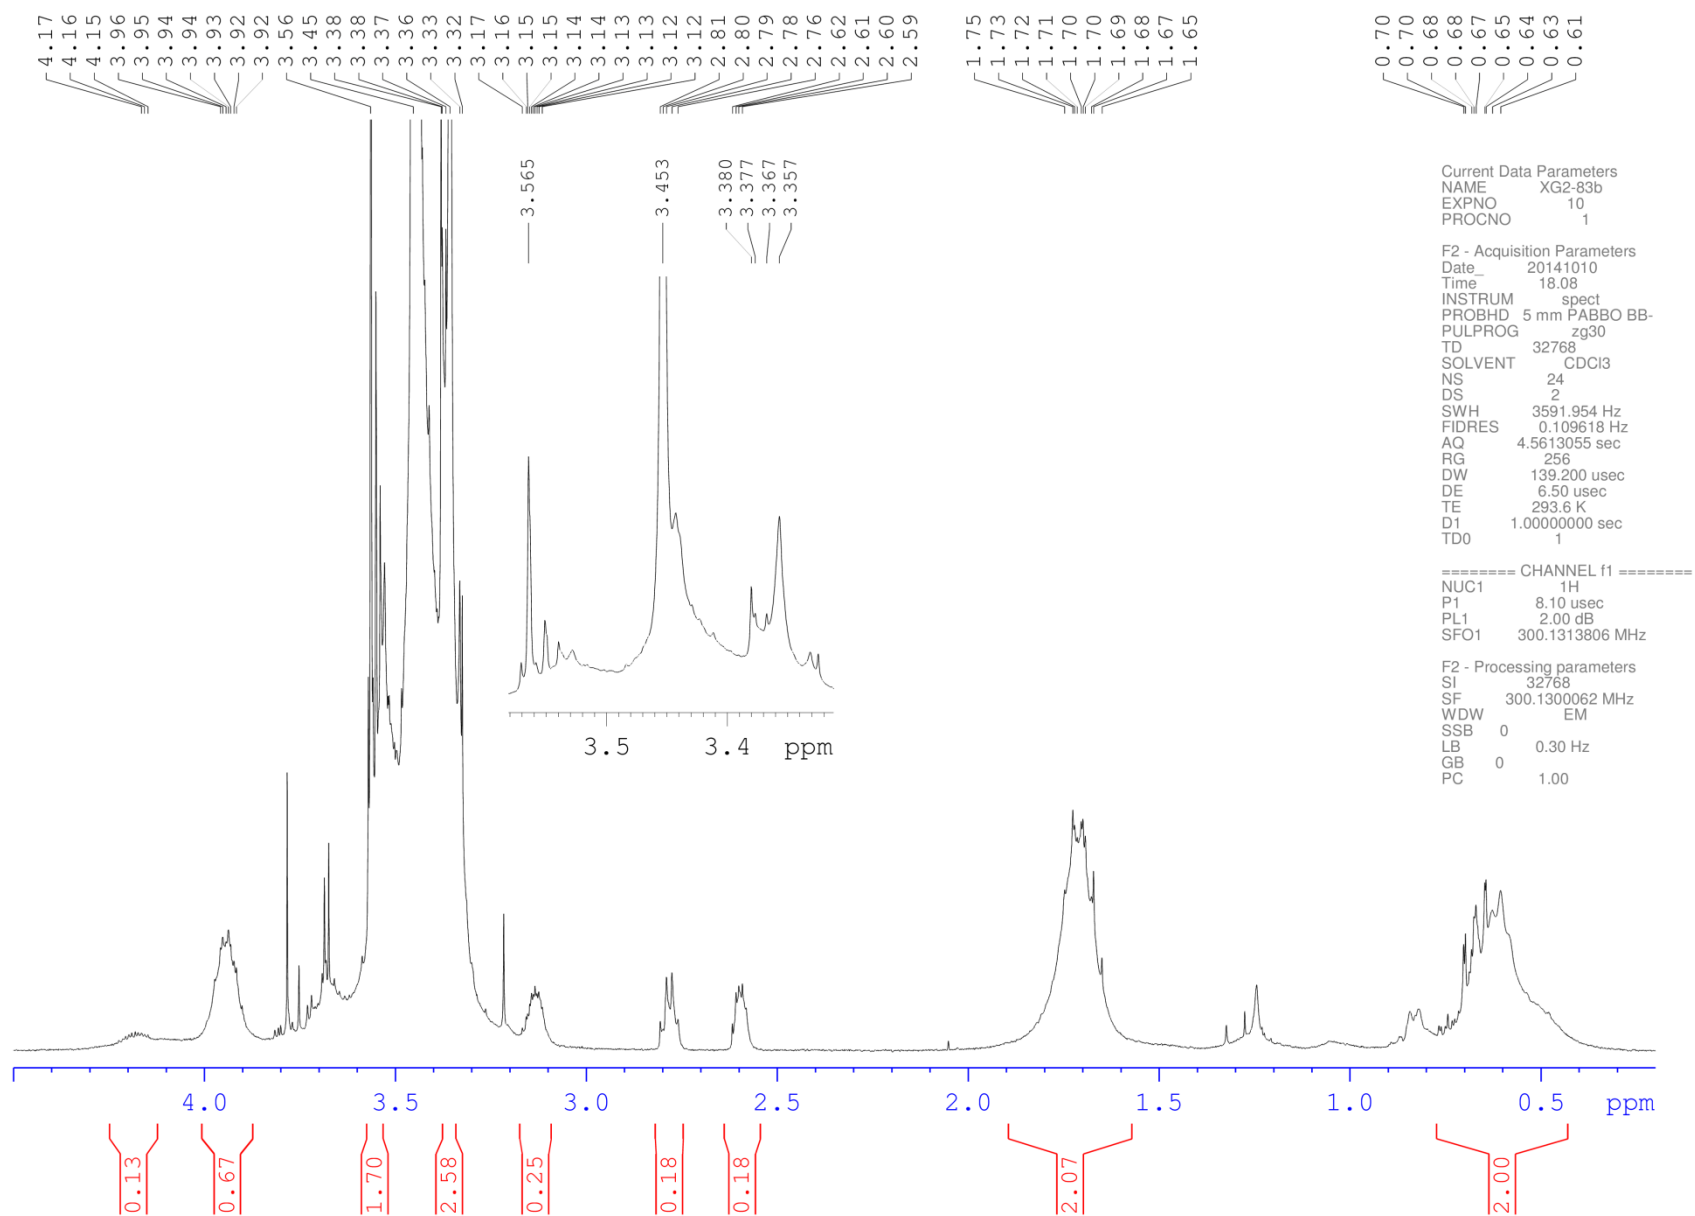

Figure SI\_174: <sup>1</sup>H NMR spectrum of the crude mixture of the reaction between sodium methoxide and GPTMS in methanol (reflux, 3.5h). (Scheme 8 (c.) in article)

# SI\_175

XG2-129b 1H CDC13

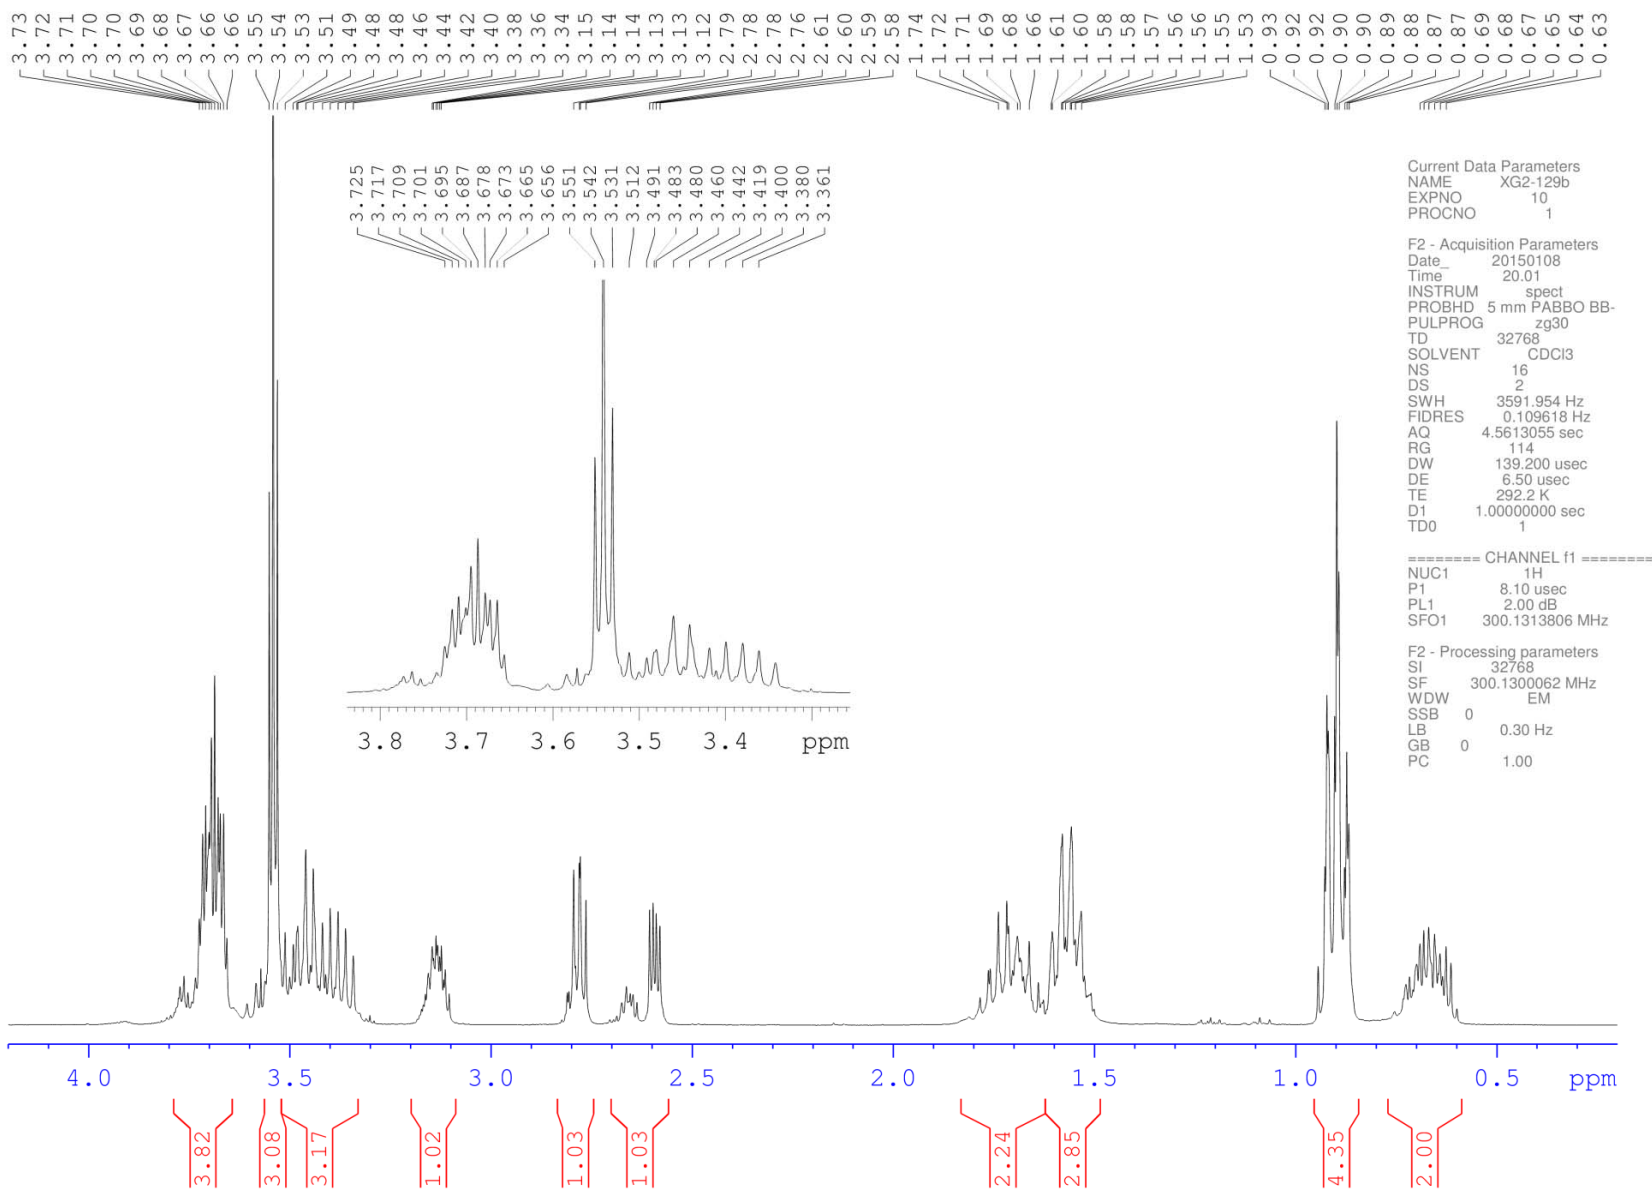

Figure SI\_175: <sup>1</sup>H NMR spectrum of the crude mixture of the reaction of GPTMS with *n*-propanol in presence of 3 mol% of BF<sub>3</sub>•Et<sub>2</sub>O (DCM, rt, 1.5h). (Scheme 9. in article)

# SI\_176

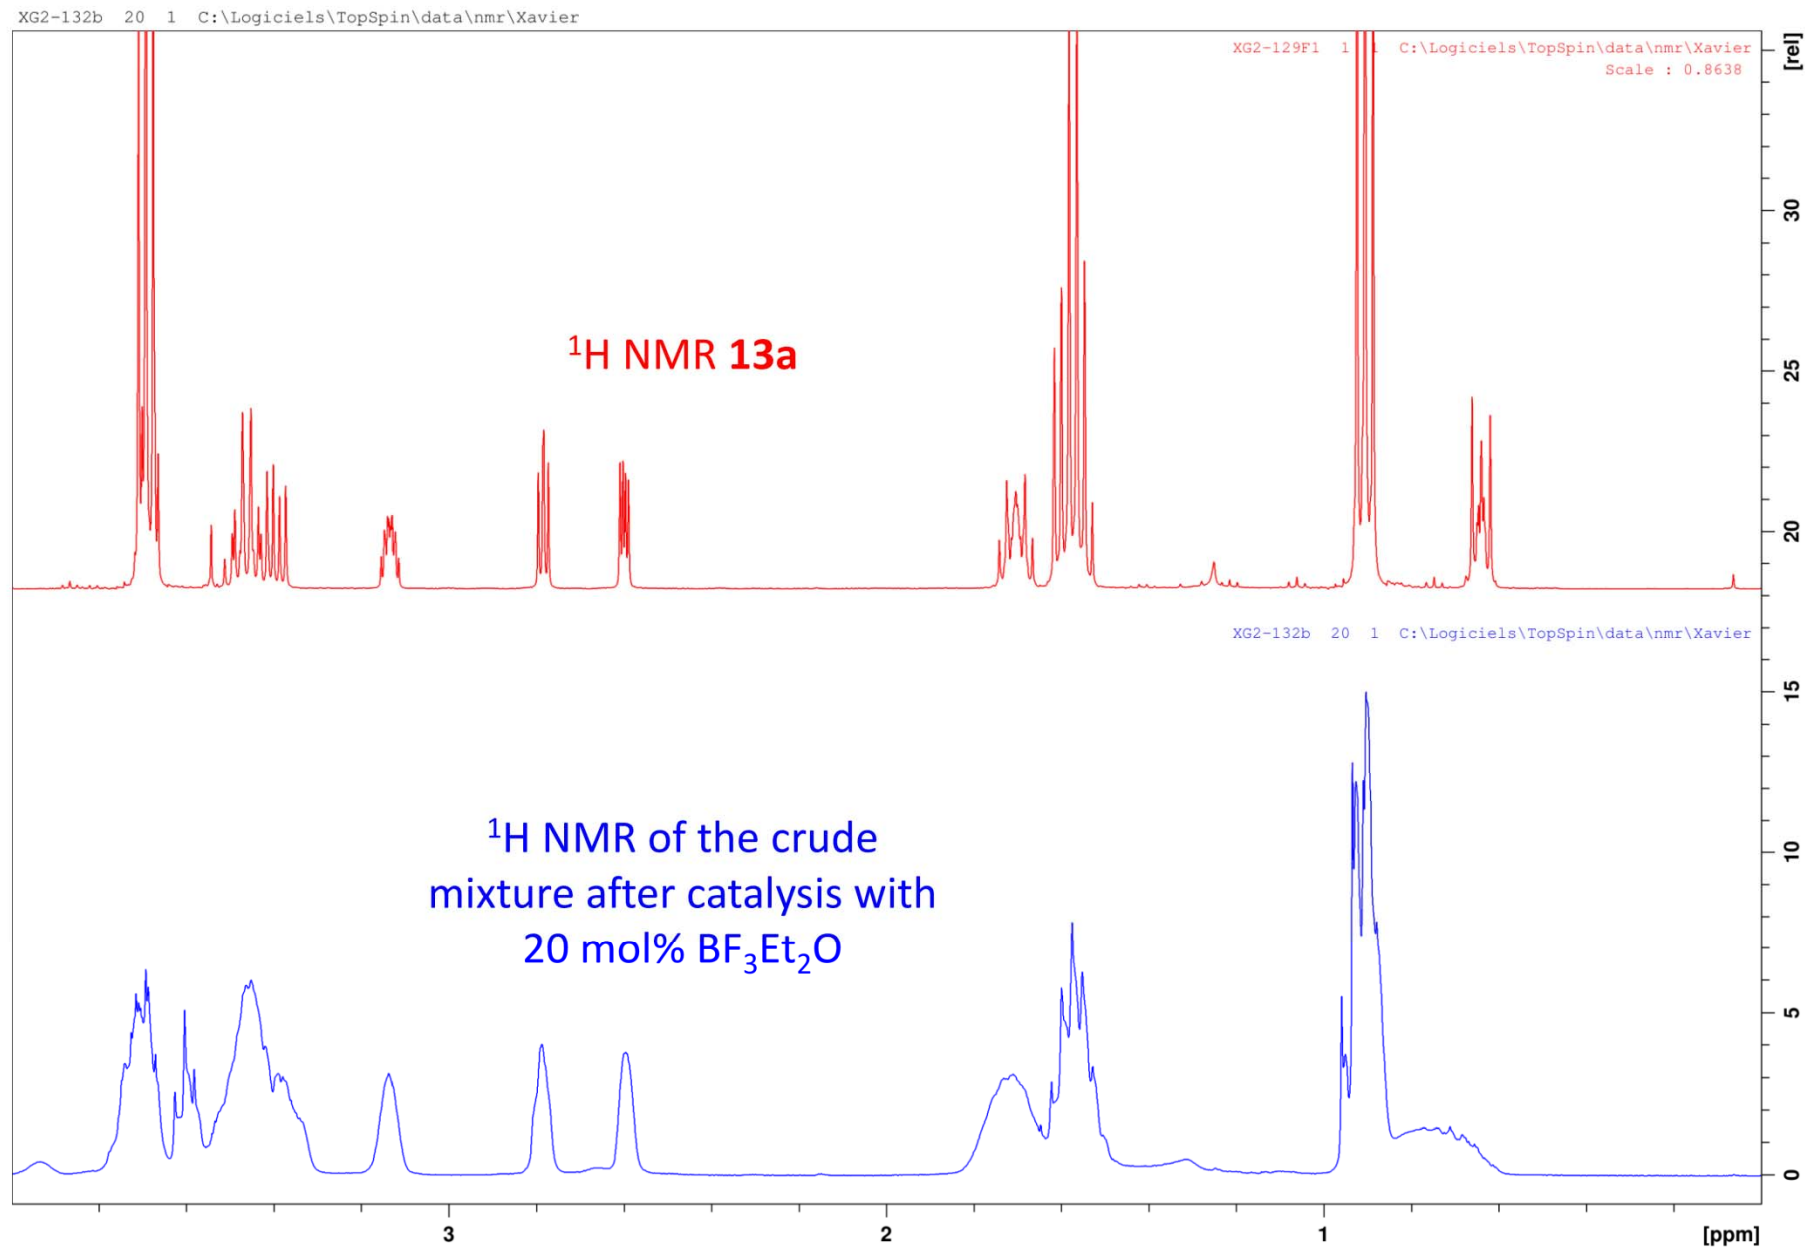

Figure SI\_176: Comparison of the  $^1\text{H}$  NMR spectra of the crude mixture (blue) obtained after the reaction of GPTMS with *n*-propanol in presence of 20mol% of  $\text{BF}_3\cdot\text{Et}_2\text{O}$  with the spectra of compound 13a (red).

### G. Annex of the article gathering objections and misinterpretations of the literature

This article aims at exploring the dual reactivity of functional alkoxy-silanes and their sensitivity towards reaction conditions. These investigations revealed results that could bring questioning about published work. In our sense, the reactivity of the silicon moiety of functional alkoxy-silanes versus the epoxide function has been widely underestimated in various articles describing the reactivity of alkoxy-silanes. In fact, such reactions in sol-gel hybrid synthesis using nucleophiles are not well characterized in the literature and can suggest some misinterpretations in some published results. So that, we can contest that some data at the molecular level (NMR for instance) are missing in papers, but these data are clearly essential to conclude to epoxide opening of the glycidyl moiety within glycidylalkoxy-silanes. As general statement we can dispute that several misinterpretations are commonly made in the literature. This section is dedicated to describe few of these collected examples from the literature.

- It appeared in the literature that the reaction schemes describing the reactivity of alkoxy-silanes with varied nucleophiles give no alteration of the silicon moiety. In the view of our results, it seems complicated to describe selective modification of the epoxide moiety by using alcohols or thiols reactive species.

Based on our results, these data remain unclear and there is no spectral evidence in these papers showing that the epoxide function and/or the alkoxy-silane moiety have/has been modified.

- B. Yan, X.-L. Wang, K. Qian, H.-F. Lu *Journal of Photochemistry and Photobiology A: Chemistry* 212 (2010) 75–80

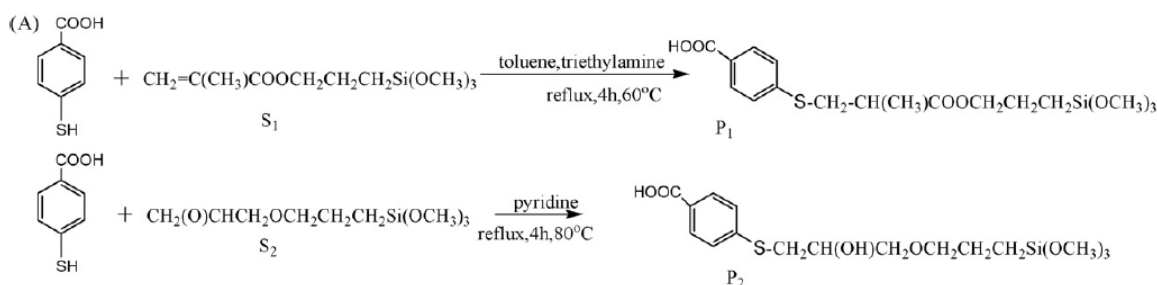

- M. A. Melo Jr., F.J.V.E. Oliveira, C. Airoidi *Applied Clay Science* 42 (2008) 130–136

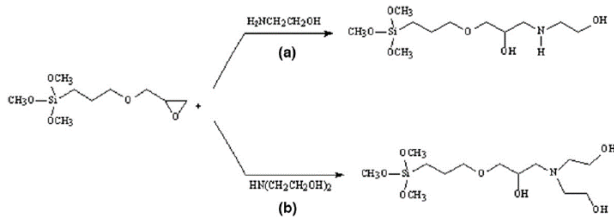

The silylating agents were synthesized by adding, with stirring under a dry nitrogen atmosphere, 2.10 cm<sup>3</sup> (35.0 mmol) of ethanolamine or 3.36 cm<sup>3</sup> (35.0 mmol) of diethanolamine to 7.74 cm<sup>3</sup> (35.0 mmol), of 3-glycidyloxypropyltrimethoxysilane dissolved in 100 cm<sup>3</sup> of dry ethanol. To complete the incorporation of these molecules into the epoxide three membered ring, the mixture was left under reflux for 72 h at 323 K.

- H.M. Tan, S.F. Soh, J. Zhao, E.L. Yong, Y. Gong *Chirality* 23 (2011) E91–E97

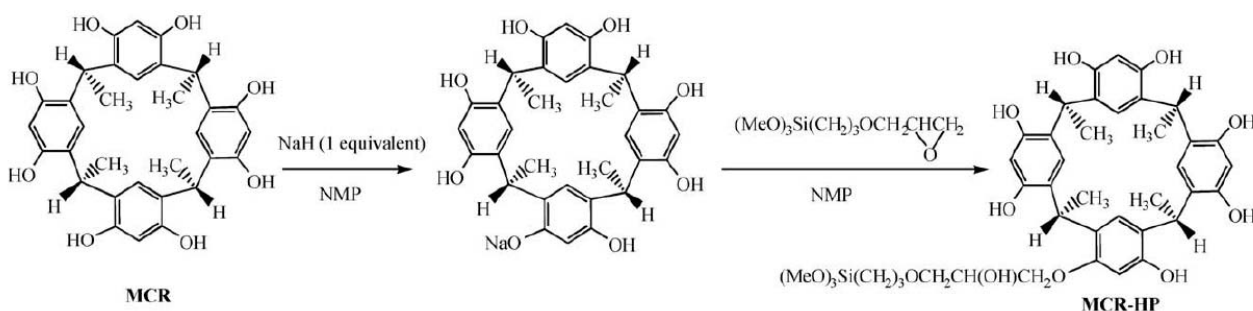

# SI\_178

- W. Tang, J. Zhao, B. Sha, H. Liu J. Appl. Polym. Sci. 127, (2013), 2803-2808.

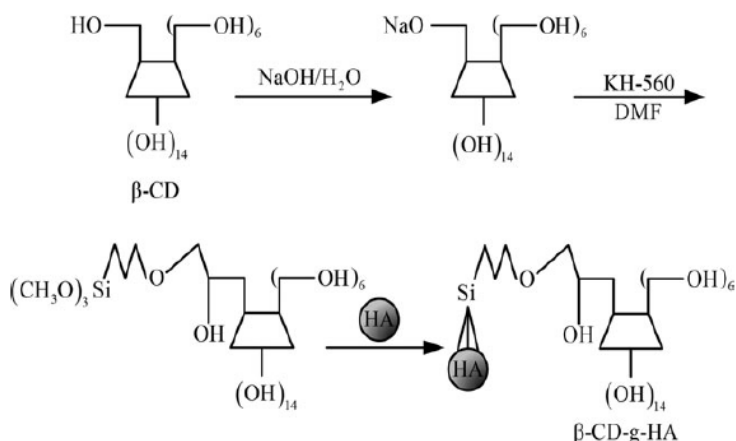

At first, this paper did not write properly the resulting product arising from ring-opening reaction. Only ring opening reaction is described which is not in accordance with the reactivity of alkoxides in presence of GPTMS.

- After exploring intensively the reactivity of alkoxysilanes (GPTMS, GPTES) using various simple nucleophiles, we discuss in our article that the  $^1\text{H}$  NMR chemical shift relative to the ring opening of the epoxide function of glycidyl moiety is very significant in comparison to the native epoxide. In fact, the  $^1\text{H}$  NMR chemical shift of C-H epoxide are located at 3.1-3.2ppm whereas the chemical shift of CH for the ring opened compounds are located at 3.8-4.2ppm. In the course of our studies, these information are crucial in order to conclude whether the epoxide is still remaining.

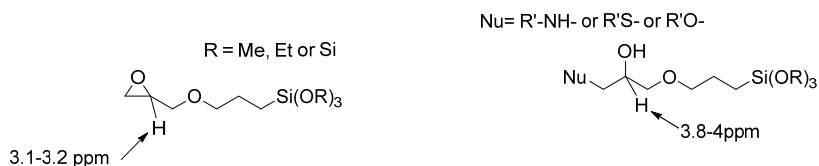

In our model studies, these observations were relatively clear since our resulting compounds displayed NMR data more simple than some of the more sophisticated structures that appear in the literature. Nevertheless, it appeared a collection of published examples where the native epoxide is clearly present in the NMR spectra (when these spectra are available). In our point of view, the following articles revealed misinterpretations regarding the reactivity of the epoxide in presence of nucleophiles. These following examples have been selected because NMR data analysis were provided and could suggest eventual misinterpretations from the authors. In many cases of the literature, the analytical information are not fully provided, so that it is hard to conclude on the ring opening of the epoxide without these NMR data.

- M. Das, D. Bandyopadhyay, R.P. Singh, H. Harde, S. Kumara, S.J. Mater. Chem., 2012, 22, 24652

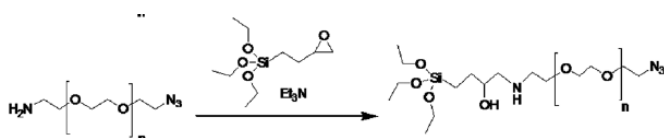

2.2.1.2. *Synthesis of azido-terminated PEG silane.* For synthesis of azido-terminated PEG silane,  $\alpha$ -amino,  $\omega$ -azido PEG-600 (0.1 mmol) was added to an ethanolic solution of 3-glycidoxypropyltriethoxy-silane (0.09 mmol).  $\text{Et}_3\text{N}$  (0.14 mmol, 20  $\mu\text{l}$ ) was added to the solution and the reaction mixture was left to stirring for 12 h.

# SI\_179

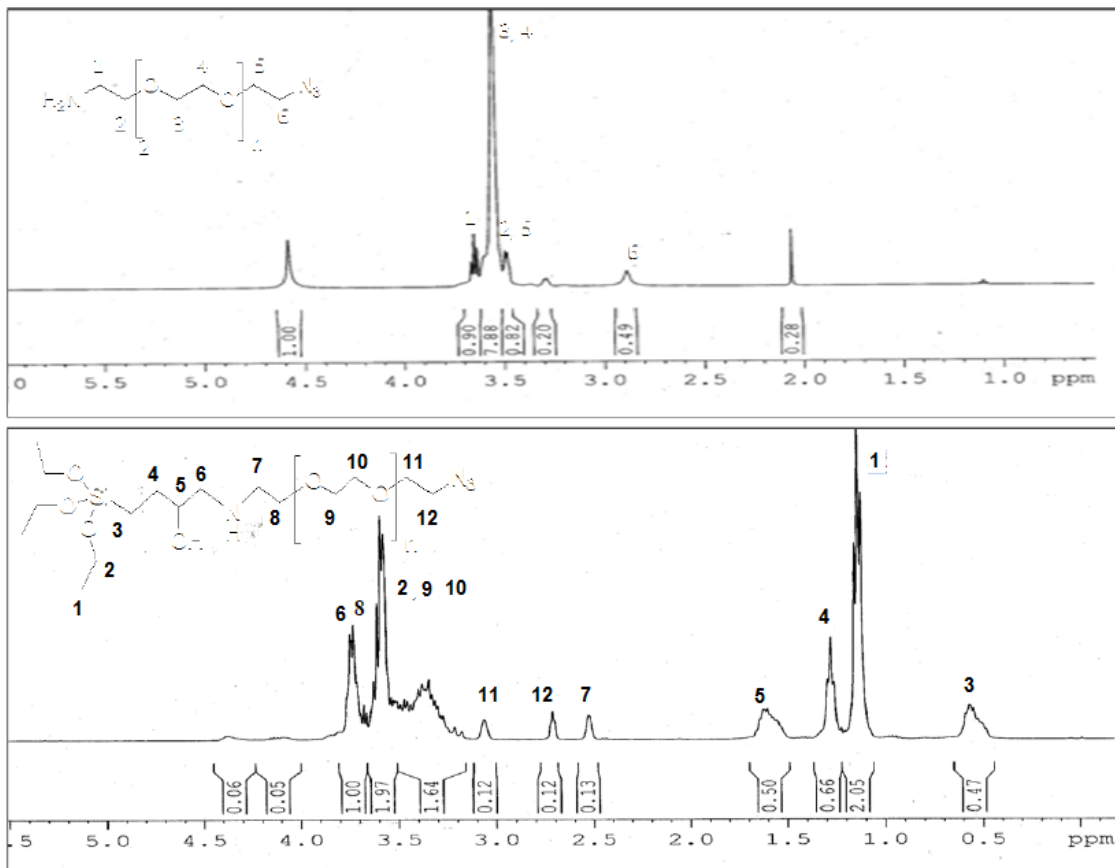

At first, the authors did not describe properly the chemical structures of the GPTES and the proposed resulting compound. As previously mentioned, the chemical shift of the CH(5) resulting from ring opening of the epoxide should be located around 3.8-4.2 ppm. The authors have described this proton-CH(5) at 1.6ppm which could be actually more assigned to the missing protons of the structure as represented as the CH<sub>2</sub>(d) in the below-described <sup>1</sup>H-NMR of GPTES that we provide. After comparison of these <sup>1</sup>H-NMR spectra between their structure and the starting material GPTES, the signals H-11, H-12 and H-7 look very similar to the native glycidyl part of the GPTES starting material. So that, these observations could bring questioning about the ring opening of the epoxide function.

# SI\_180

## $^1\text{H-NMR}$ of assigned GPTES in $\text{CDCl}_3$

GPTES  $\text{CDCl}_3$  RMN  $^1\text{H}$

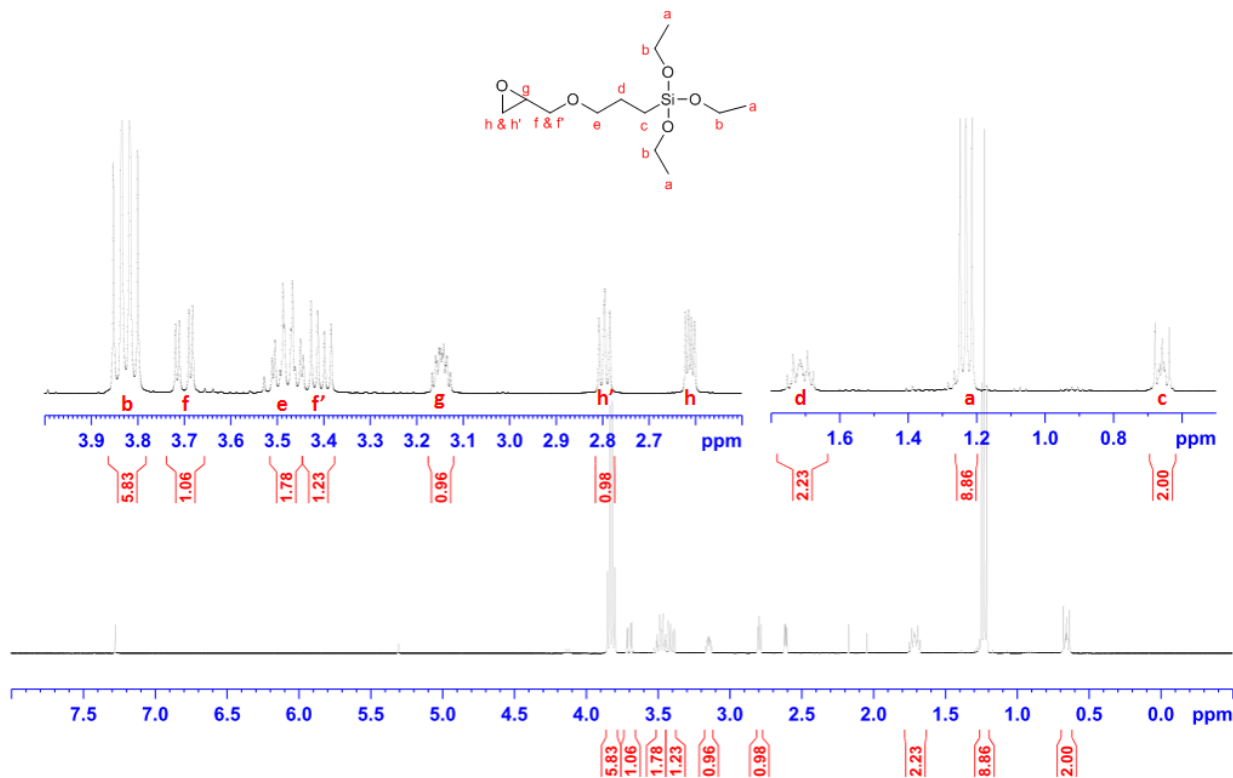

- M.M. Wan, L. Gao, Z. Chen, Y.K. Wang, Y. Wang, J. H. Zhu *Microporous and Mesoporous Materials* 155 (2012) 24–33.

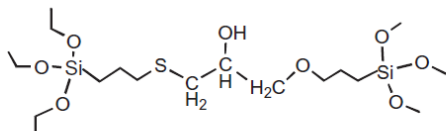

**Scheme 1.** The structure of the 1-O-[trimethoxysilylpropyl]-3-S-[triethoxysilylpropyl]-2-propanol (M-G).

To prepare the M-G bridge molecule, GPTMS (4.72 g, 20 mmol) was firstly dissolved in toluene with stirring, and then MPTES (4.76 g, 20 mmol) was added into the solution by drops. The mixture was refluxed at 85 °C under nitrogen atmosphere for 24 h.



# SI\_181

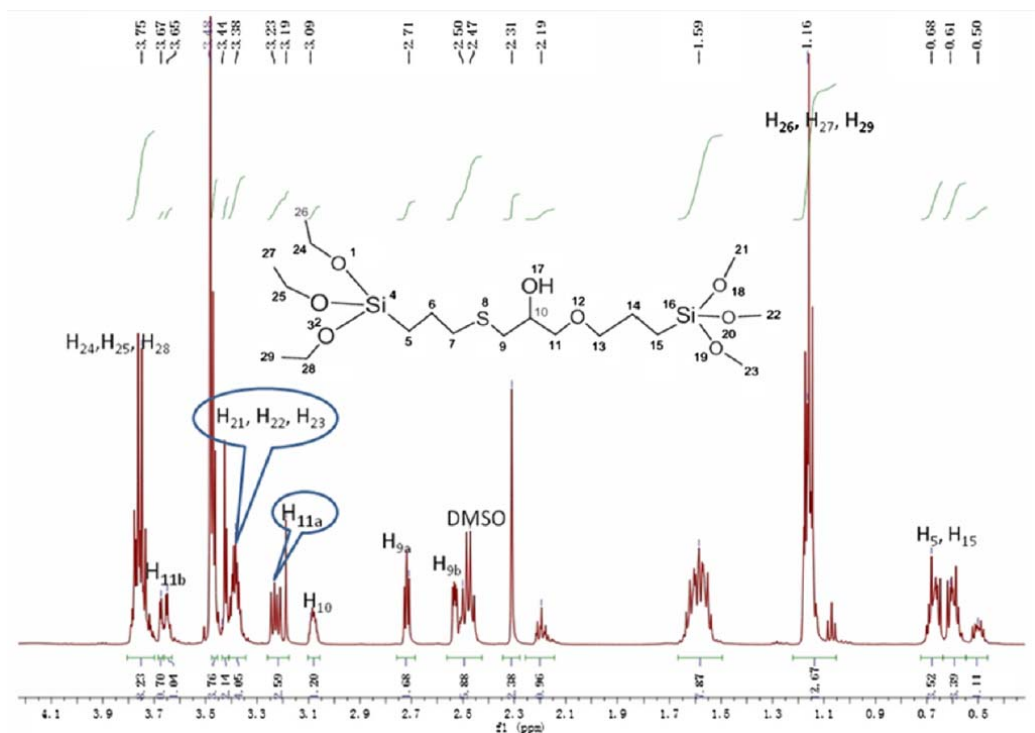

Firstly, the attribution for the protons H-21, H-22 and H-23 should be more located at 3.5ppm, whereas this signal at 3.38ppm would fit better with both protons H-13 (as similar as the GPTMS signals labelled H<sub>e</sub>– see below). In this cited article, the authors have also assigned the proton (H-10) at 3.1ppm. However, this signal related to the ring opened product should be more shifted at 3.8-4.2ppm. Actually, in this region (3.8-4.2ppm), there is no evidence of ring-opened product. In consequence, it seems that the <sup>1</sup>H NMR signals at 3.1ppm, 2.7ppm and 2.6ppm are more representative of the unmodified glycidyl moiety of GPTMS(H<sub>f</sub>, H<sub>g</sub>, H<sub>h</sub>) (see below for the <sup>1</sup>H NMR of the GPTMS in DMSO).

# SI\_182

## <sup>1</sup>H-NMR of assigned GPTMS in DMSO

GPTMS-DMSO

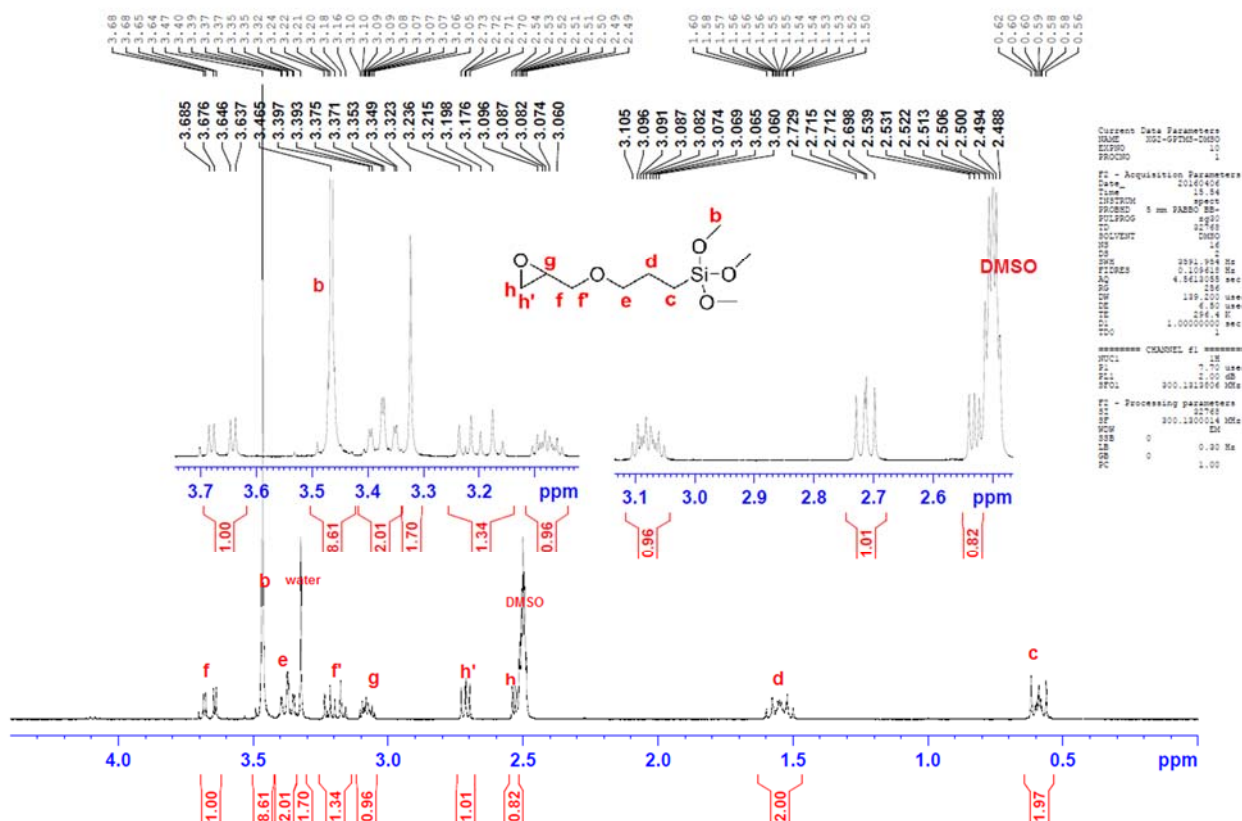

- M. Arslan, S. Sayin, M. Yilmaz Tetrahedron: Asymmetry 24 (2013) 982–989

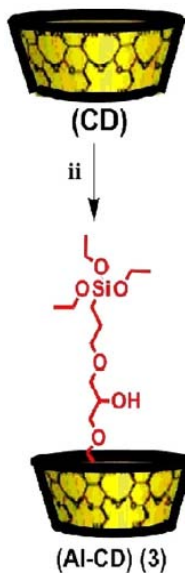

(ii) [3-(2,3-epoxypropoxy)propyl]trimethoxysilane, DMF, 50 °C, 3 h;

### 5.3.3. Synthesis of alcohol functionalized $\beta$ -cyclodextrin (Al-CD) 3

Yield 71.8%, <sup>1</sup>H NMR (400 MHz, DMSO):  $\delta$  (ppm) 2.70 (br, 14H), 2.86 (br, 14H), 3.34–3.26 (m, 42H), 3.70–3.42 (m, 119H), 4.81 (d, 21H,  $J = 5.48$  Hz). <sup>13</sup>C NMR (400 MHz, DMSO):  $\delta$  (ppm) 31.23, 36.24, 60.39, 72.50, 72.89, 73.52, 81.99, 102.40. Anal. Calcd for C<sub>126</sub>H<sub>252</sub>O<sub>70</sub>Si<sub>7</sub>: C, 49.07; H, 8.24. Found: C, 49.18; H, 8.08.

# SI\_183

In this cited article, even if NMR data are provided, the assignment seem incomplete by comparison with the expected structure.

- J.-T. Hu, A. Gu, G. Liang, D. Zhuo, L. Yuan *Journal of Applied Polymer Science*, 126, (2012) 205–215.

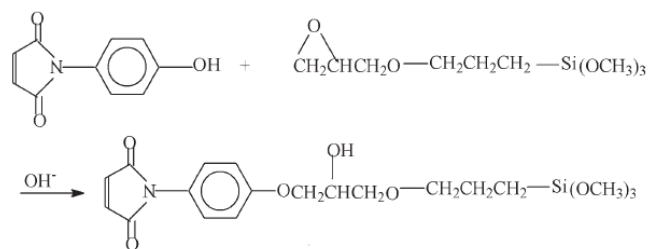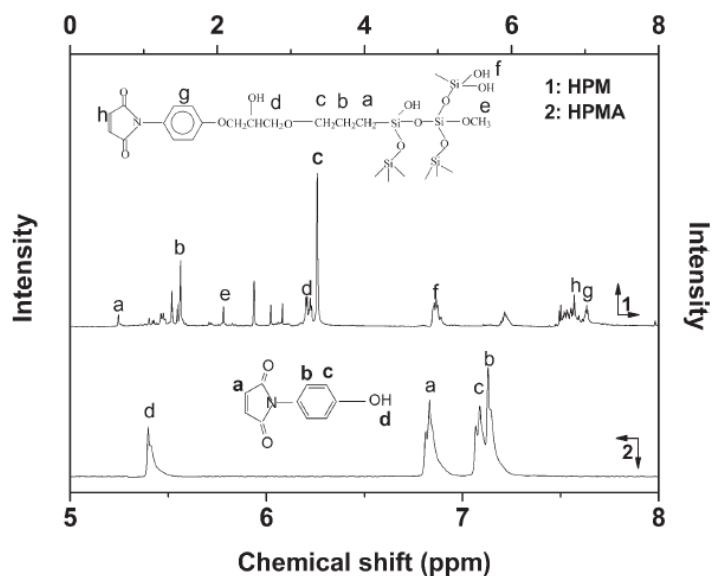

$^1\text{H-NMR}$  (*N*-dimethylsulfoxide as solvent, ppm):  
 0.66 ( $\text{Si-CH}_2-$ ); 1.5, 3.4 ( $-\text{CH}_2-\text{CH}_2-\text{CH}_2-$ ); 3.2 ( $-\text{O-CH}_2-$ ); 6.75 ( $-\text{CH}=\text{CH}-$  of maleimide ring);  
 7.02 (aromatic protons).

In this cited article, the NMR assignments are once again incomplete by comparison with the expected structure. Some misinterpretations are also disclosed: the methoxy group  $\text{H}_e$  should be assigned at 3.3ppm. There is no clear evidence of the C-H proton resulting from ring opening reaction which should be expected at 3.8-4.2 ppm. The unlabeled signals at 2.5; 2.7 and 3.1 ppm could fit with the starting glycidyl moiety of GPTMS.

## H. Annex of the article: References of the literature being disputed when using $\text{BF}_3 \cdot \text{Et}_2\text{O}$ for functionalization of glycidylalkoxysilanes.

As discussed in the article, the use of  $\text{BF}_3 \cdot \text{Et}_2\text{O}$  as activator is very common in order to facilitate the ring opening of epoxide function. However, our results strongly suggest that the addition of alcohols nucleophiles in presence of such activator and GPTMS or GPTES reagents results only in trans-etherification reaction on the silicon group. Here are few examples of the literature disclosing ring-opening reaction of glycidylalkoxysilanes:

- S. Tang, T. Ikai, M. Tsuji, Y. Okamoto *J. Sep. Sci.* 33, (2010), 1255–1263

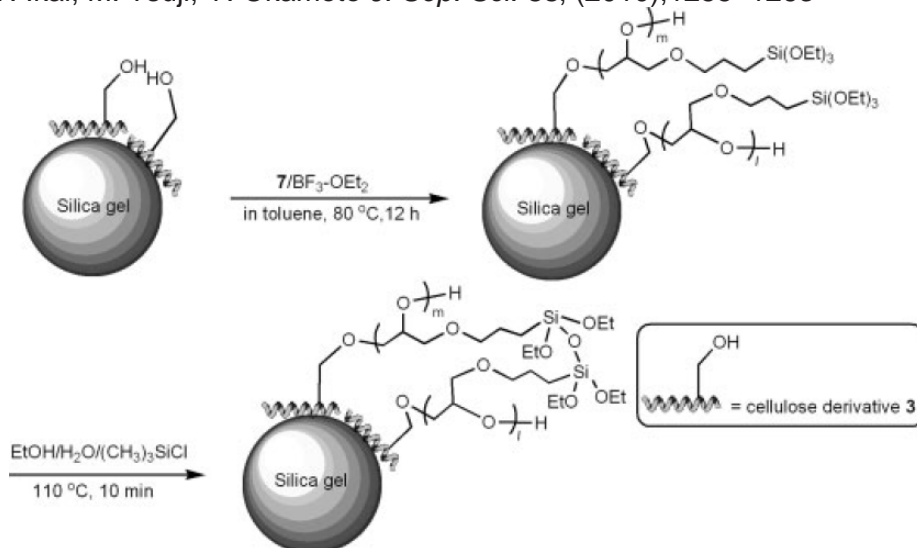

- Y. Xin, Z. Rui, L. Guoquan *Journal of Liquid Chromatography & Related Technologies* 23, (2000) 1821-1830.

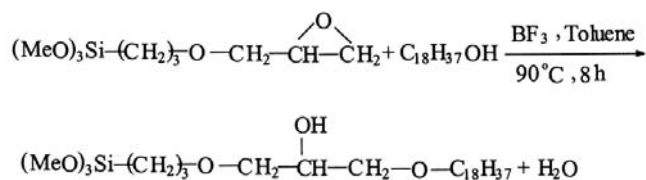

Bonding of the terminal C<sub>18</sub> chain onto  $\gamma$ -glycidoxypropyltrimethoxysilane was through ring opening reaction then followed by silanization with silica gel as follows:

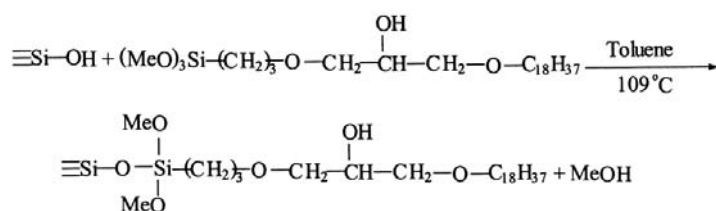

Supplement: c6ra01658h1.pdf [file c6ra01658h1.pdf]
